# Supplementary material
Source: publisher figshare collection journal article supplement (https://acs.figshare.com/ndownloader/files/5763771)
Supplement: Supplementary file 1 [file 5763771]

# ja990034a.cif

data_[Cp2Ti(SH)2RuClCp*](3)
#------------------------------------------------------------------------------
_audit_creation_date                  'Tue Oct 21 20:07:18 1997'
_audit_creation_method                'from TEXRAY.INF file'
_audit_update_record                   ?
#------------------------------------------------------------------------------
_computing_data_collection            'MSC/AFC Diffractometer Control'
_computing_cell_refinement            'MSC/AFC Diffractometer Control'
_computing_data_reduction             'teXsan: PROCESS (MSC)'
_computing_structure_solution          ?
_computing_structure_refinement       'teXsan: LS (MSC)'
_computing_publication_material       'teXsan: FINISH (MSC)'
#------------------------------------------------------------------------------
_cell_length_a                         15.800(2)
_cell_length_b                         16.424(4)
_cell_length_c                         8.073(2)
_cell_angle_alpha                      90
_cell_angle_beta                       90
_cell_angle_gamma                      90
_cell_volume                           2095.1(6)
_cell_formula_units_Z                  4.00
_cell_measurement_temperature          23.0
_cell_measurement_reflns_used          25
_cell_measurement_theta_min            36.07
_cell_measurement_theta_max            39.89
#------------------------------------------------------------------------------
_symmetry_cell_setting                 orthorhombic
_symmetry_space_group_name_H-M        'P 21 21 21 '
_symmetry_Int_Tables_number            19
_symmetry_space_group_name_Hall        ?
loop_
_symmetry_equiv_pos_as_xyz
  '   +x,   +y,   +z'
  '1/2-x,   -y,1/2+z'
  '1/2+x,1/2-y,   -z'
  '   -x,1/2+y,1/2-z'
#------------------------------------------------------------------------------
_exptl_crystal_description            'prismatic'
_exptl_crystal_colour                 'red'
_exptl_crystal_size_max                0.8
_exptl_crystal_size_mid                0.5
_exptl_crystal_size_min                0.3
_exptl_crystal_density_diffrn          1.636
_exptl_crystal_density_measured        ?
_exptl_crystal_F000                    1048.00
_exptl_absorpt_coefficient_mu_cm       14.300
_exptl_absorpt_correction_type         empirical
_exptl_absorpt_process_descript        psi-scan
_exptl_absorpt_correction_T_max        1.000
_exptl_absorpt_correction_T_min        0.950
#------------------------------------------------------------------------------
_diffrn_special_details                none
_diffrn_ambient_temperature            23.0
_diffrn_radiation_wavelength           0.7107
_diffrn_radiation_type                 MoKalpha
_diffrn_radiation_source              'X-ray tube'
_diffrn_radiation_monochromator        graphite
_diffrn_radiation_detector             ?
_diffrn_measurement_device            'AFC7R'
_diffrn_measurement_method            'omega/2-theta scans'

_diffrn_standards_number              3
_diffrn_standards_interval_count      150
_diffrn_standards_decay_\%             -0.31
loop_
_diffrn_standard_refln_index_h
_diffrn_standard_refln_index_k
_diffrn_standard_refln_index_l
   -1 -1 -1    -2 0 -1    0 -2 -1  

_diffrn_reflns_number                  2148
_diffrn_reflns_av_R_equivalents        0.00
_diffrn_reflns_av_sigmaI/Inet          ?
_diffrn_reflns_h_min                   0
_diffrn_reflns_h_max                   18
_diffrn_reflns_k_min                   0
_diffrn_reflns_k_max                   19
_diffrn_reflns_l_min                   0
_diffrn_reflns_l_max                   1
_diffrn_theta_min                      ?
_diffrn_theta_max                      24.9984
_diffrn_reflns_reduction_process       ?

_diffrn_orient_matrix_11              -0.03410
_diffrn_orient_matrix_12              -0.04792
_diffrn_orient_matrix_13              -0.03721
_diffrn_orient_matrix_21              -0.05327
_diffrn_orient_matrix_22               0.02974
_diffrn_orient_matrix_23               0.02850
_diffrn_orient_matrix_31              -0.00218
_diffrn_orient_matrix_32               0.02295
_diffrn_orient_matrix_33              -0.11465
#------------------------------------------------------------------------------
loop_
_atom_type_symbol
_atom_type_oxidation_number
_atom_type_number_in_cell
_atom_type_scat_dispersion_real
_atom_type_scat_dispersion_imag
_atom_type_scat_source
  C  0    80 0.003 0.002    'International Tables'
  H  0   108 0.000 0.000    'International Tables'
  S  0     8 0.125 0.123    'International Tables'
  Cl 0     4 0.148 0.159    'International Tables'
  Ti 0     4 0.278 0.446    'International Tables'
  Ru 0     4 -1.259 0.836    'International Tables'
#------------------------------------------------------------------------------
loop_
_atom_site_label
_atom_site_fract_x
_atom_site_fract_y
_atom_site_fract_z
_atom_site_U_iso_or_equiv
_atom_site_thermal_displace_type
_atom_site_calc_flag
_atom_site_calc_attached_atom
 Ru     0.02465(3)  0.07190(3)  0.12435(6)  0.0313      Uij ? ?
 Ti     0.16503(7)  0.20704(6)  0.1206(2)   0.0384      Uij ? ?
 Cl     -0.04547(9) 0.1262(1)   -0.1214(3)  0.0618      Uij ? ?
 S1     0.0223(1)   0.20375(9)  0.2414(2)   0.0525      Uij ? ?
 S2     0.15463(9)  0.0747(1)   -0.0199(2)  0.0383      Uij ? ?
 C1     0.1913(6)   0.1661(8)   0.398(1)    0.1020      Uij ? ?
 C2     0.2157(6)   0.2435(5)   0.389(1)    0.0797      Uij ? ?
 C3     0.2832(6)   0.2456(6)   0.285(1)    0.0795      Uij ? ?
 C4     0.2993(6)   0.1681(9)   0.228(1)    0.1030      Uij ? ?
 C5     0.2395(9)   0.1179(5)   0.305(2)    0.1138      Uij ? ?
 C6     0.1095(5)   0.2660(4)   -0.124(1)   0.0633      Uij ? ?
 C7     0.1066(5)   0.3256(4)   -0.004(1)   0.0741      Uij ? ?
 C8     0.1877(6)   0.3448(4)   0.0410(9)   0.0685      Uij ? ?
 C9     0.2415(4)   0.2973(5)   -0.0530(10) 0.0609      Uij ? ?
 C10    0.1938(5)   0.2490(4)   -0.1558(9)  0.0561      Uij ? ?
 C11    -0.0622(4)  0.0230(4)   0.3125(8)   0.0424      Uij ? ?
 C12    0.0213(4)   -0.0002(3)  0.3534(8)   0.0392      Uij ? ?
 C13    0.0532(4)   -0.0485(4)  0.2234(8)   0.0390      Uij ? ?
 C14    -0.0100(3)  -0.0558(3)  0.0986(7)   0.0365      Uij ? ?
 C15    -0.0822(4)  -0.0115(4)  0.1608(9)   0.0451      Uij ? ?
 C16    -0.1208(4)  0.0697(5)   0.4262(10)  0.0836      Uij ? ?
 C17    0.0601(5)   0.0094(5)   0.5220(8)   0.0711      Uij ? ?
 C18    0.1352(4)   -0.0945(4)  0.2252(9)   0.0641      Uij ? ?
 C19    -0.0066(4)  -0.1060(4)  -0.0539(8)  0.0662      Uij ? ?
 C20    -0.1664(4)  -0.0078(4)  0.072(1)    0.0857      Uij ? ?
 H1     0.1452      0.1464      0.4619      0.1107      Uij ? ?
 H2     0.1922      0.2880      0.4451      0.0978      Uij ? ?
 H3     0.3145      0.2931      0.2546      0.0922      Uij ? ?
 H4     0.3435      0.1537      0.1541      0.1198      Uij ? ?
 H5     0.2353      0.0608      0.2892      0.1155      Uij ? ?
 H6     0.0626      0.2410      -0.1758     0.0779      Uij ? ?
 H7     0.0579      0.3502      0.0418      0.0855      Uij ? ?
 H8     0.2054      0.3835      0.1227      0.0827      Uij ? ?
 H9     0.3018      0.2978      -0.0484     0.0701      Uij ? ?
 H10    0.2152      0.2111      -0.2325     0.0678      Uij ? ?
 H11    -0.0967     0.1206      0.4530      0.0912      Uij ? ?
 H12    -0.1739     0.0769      0.3745      0.0912      Uij ? ?
 H13    -0.1288     0.0391      0.5269      0.0912      Uij ? ?
 H14    0.0636      -0.0427     0.5743      0.0747      Uij ? ?
 H15    0.1154      0.0313      0.5111      0.0747      Uij ? ?
 H16    0.0262      0.0444      0.5870      0.0747      Uij ? ?
 H17    0.1346      -0.1330     0.3134      0.0774      Uij ? ?
 H18    0.1422      -0.1221     0.1231      0.0774      Uij ? ?
 H19    0.1806      -0.0575     0.2414      0.0774      Uij ? ?
 H20    -0.0580     -0.0998     -0.1132     0.0696      Uij ? ?
 H21    0.0393      -0.0879     -0.1206     0.0696      Uij ? ?
 H22    0.0014      -0.1613     -0.0251     0.0696      Uij ? ?
 H23    -0.1806     0.0476      0.0488      0.0844      Uij ? ?
 H24    -0.1631     -0.0367     -0.0305     0.0844      Uij ? ?
 H25    -0.2097     -0.0312     0.1383      0.1021      Uij ? ?
 H26    -0.0170     0.2378      0.1351      0.0636      Uij ? ?
 H27    0.1256      0.0990      -0.1384     0.1017      Uij ? ?

loop_
_atom_site_aniso_label
_atom_site_aniso_U_11
_atom_site_aniso_U_22
_atom_site_aniso_U_33
_atom_site_aniso_U_12
_atom_site_aniso_U_13
_atom_site_aniso_U_23
 Ru     0.0276(2)   0.0352(2)   0.0312(2)   0.0039(3)   0.0008(3)   -0.0006(3) 
 Ti     0.0457(7)   0.0320(6)   0.0376(6)   -0.0021(5)  -0.0028(7)  0.0001(7)  
 Cl     0.0448(10)  0.089(1)    0.0518(10)  0.0017(9)   -0.010(1)   0.021(1)   
 S1     0.067(1)    0.0378(9)   0.052(1)    0.008(1)    0.021(1)    -0.0063(9) 
 S2     0.0351(8)   0.0360(9)   0.0439(9)   0.0028(9)   0.0089(8)   -0.0037(9) 
 C1     0.109(9)    0.116(9)    0.081(8)    -0.071(8)   -0.048(7)   0.048(7)   
 C2     0.106(7)    0.090(7)    0.043(5)    -0.019(6)   -0.015(6)   -0.013(6)  
 C3     0.075(6)    0.109(8)    0.055(5)    -0.050(6)   -0.023(5)   0.016(6)   
 C4     0.065(6)    0.17(1)     0.071(7)    0.049(7)    -0.039(6)   -0.028(8)  
 C5     0.16(1)     0.044(6)    0.13(1)     -0.008(6)   -0.12(1)    0.018(6)   
 C6     0.066(5)    0.056(5)    0.069(5)    -0.004(4)   -0.016(6)   0.023(5)   
 C7     0.077(6)    0.043(5)    0.102(7)    0.026(5)    0.040(6)    0.030(5)   
 C8     0.108(7)    0.040(5)    0.057(5)    -0.010(5)   0.020(6)    0.002(4)   
 C9     0.055(5)    0.066(6)    0.062(5)    -0.011(5)   -0.001(4)   0.018(5)   
 C10    0.079(6)    0.045(4)    0.044(5)    0.008(4)    0.011(5)    0.011(4)   
 C11    0.039(4)    0.038(4)    0.050(5)    -0.001(3)   0.014(3)    -0.003(3)  
 C12    0.041(4)    0.046(4)    0.031(4)    -0.009(4)   0.004(4)    0.003(3)   
 C13    0.034(4)    0.043(4)    0.040(4)    0.001(3)    0.004(3)    0.011(3)   
 C14    0.040(4)    0.031(3)    0.038(4)    -0.002(3)   0.003(3)    0.001(3)   
 C15    0.032(4)    0.036(4)    0.068(5)    -0.007(3)   -0.005(4)   0.020(4)   
 C16    0.069(5)    0.073(5)    0.109(7)    -0.004(5)   0.055(5)    -0.004(6)  
 C17    0.082(6)    0.093(6)    0.038(4)    -0.044(5)   0.004(4)    0.010(4)   
 C18    0.044(4)    0.050(5)    0.098(6)    0.014(4)    0.005(4)    0.027(5)   
 C19    0.097(6)    0.050(4)    0.051(4)    -0.018(4)   0.002(4)    -0.002(4)  
 C20    0.055(5)    0.064(5)    0.138(9)    -0.021(4)   -0.051(6)   0.029(5)   
#------------------------------------------------------------------------------
_refine_special_details                ?
_refine_ls_structure_factor_coef       F
_refine_ls_matrix_type                 full
_refine_ls_weighting_scheme            sigma
_refine_ls_hydrogen_treatment          ?
_refine_ls_extinction_method           Zachariasen_type_2_Gaussian_isotropic
_refine_ls_extinction_coef             2.70501
_refine_ls_abs_structure_details       ?
_refine_ls_abs_structure_Flack         ?
_refine_ls_number_reflns               1919
_refine_ls_number_parameters           227
_refine_ls_number_restraints           0
_refine_ls_number_constraints          ?
_refine_ls_R_factor_all                ?
_refine_ls_R_factor_obs                0.0280
_refine_ls_wR_factor_all               ?
_refine_ls_wR_factor_obs               0.0220
_refine_ls_goodness_of_fit_all         ?
_refine_ls_goodness_of_fit_obs         2.460
_refine_ls_shift/esd_max               0.2220
_refine_ls_shift/esd_mean              ?
_refine_diff_density_min               0.34800
_refine_diff_density_max               -0.54140
#------------------------------------------------------------------------------
_geom_special_details                  ?
loop_
_geom_bond_atom_site_label_1
_geom_bond_atom_site_label_2
_geom_bond_distance
_geom_bond_site_symmetry_1
_geom_bond_site_symmetry_2
_geom_bond_publ_flag
    Ru        Cl        2.441(2)   ? ? yes
    Ru        S(1)      2.363(2)   ? ? yes
    Ru        S(2)      2.361(2)   ? ? yes
    Ru        C(11)     2.200(6)   ? ? yes
    Ru        C(12)     2.196(6)   ? ? yes
    Ru        C(13)     2.181(6)   ? ? yes
    Ru        C(14)     2.177(5)   ? ? yes
    Ru        C(15)     2.194(6)   ? ? yes
    Ti        S(1)      2.458(2)   ? ? yes
    Ti        S(2)      2.458(2)   ? ? yes
    Ti        C(1)      2.37(1)    ? ? yes
    Ti        C(2)      2.389(8)   ? ? yes
    Ti        C(3)      2.377(7)   ? ? yes
    Ti        C(4)      2.381(8)   ? ? yes
    Ti        C(5)      2.394(9)   ? ? yes
    Ti        C(6)      2.370(8)   ? ? yes
    Ti        C(7)      2.378(7)   ? ? yes
    Ti        C(8)      2.379(7)   ? ? yes
    Ti        C(9)      2.371(7)   ? ? yes
    Ti        C(10)     2.379(7)   ? ? yes
    C(1)      C(2)      1.33(1)    ? ? yes
    C(1)      C(5)      1.33(1)    ? ? yes
    C(2)      C(3)      1.36(1)    ? ? yes
    C(3)      C(4)      1.38(1)    ? ? yes
    C(4)      C(5)      1.40(1)    ? ? yes
    C(6)      C(7)      1.38(1)    ? ? yes
    C(6)      C(10)     1.384(9)   ? ? yes
    C(7)      C(8)      1.368(10)  ? ? yes
    C(8)      C(9)      1.381(9)   ? ? yes
    C(9)      C(10)     1.373(9)   ? ? yes
    C(11)     C(12)     1.412(8)   ? ? yes
    C(11)     C(15)     1.386(9)   ? ? yes
    C(11)     C(16)     1.513(8)   ? ? yes
    C(12)     C(13)     1.409(8)   ? ? yes
    C(12)     C(17)     1.501(8)   ? ? yes
    C(13)     C(14)     1.424(7)   ? ? yes
    C(13)     C(18)     1.500(7)   ? ? yes
    C(14)     C(15)     1.442(8)   ? ? yes
    C(14)     C(19)     1.483(8)   ? ? yes
    C(15)     C(20)     1.514(8)   ? ? yes
#------------------------------------------------------------------------------
loop_
_geom_angle_atom_site_label_1
_geom_angle_atom_site_label_2
_geom_angle_atom_site_label_3
_geom_angle
_geom_angle_site_symmetry_1
_geom_angle_site_symmetry_2
_geom_angle_site_symmetry_3
_geom_bond_publ_flag
   Cl        Ru        S(1)      89.03(7)   ? ? ? yes
   Cl        Ru        S(2)      89.24(6)   ? ? ? yes
   Cl        Ru        C(11)     114.3(2)   ? ? ? yes
   Cl        Ru        C(12)     150.5(2)   ? ? ? yes
   Cl        Ru        C(13)     136.3(2)   ? ? ? yes
   Cl        Ru        C(14)     99.2(2)    ? ? ? yes
   Cl        Ru        C(15)     89.3(2)    ? ? ? yes
   S(1)      Ru        S(2)      101.15(6)  ? ? ? yes
   S(1)      Ru        C(11)     92.8(2)    ? ? ? yes
   S(1)      Ru        C(12)     99.0(2)    ? ? ? yes
   S(1)      Ru        C(13)     133.5(2)   ? ? ? yes
   S(1)      Ru        C(14)     156.5(2)   ? ? ? yes
   S(1)      Ru        C(15)     120.4(2)   ? ? ? yes
   S(2)      Ru        C(11)     152.9(2)   ? ? ? yes
   S(2)      Ru        C(12)     116.5(2)   ? ? ? yes
   S(2)      Ru        C(13)     91.1(2)    ? ? ? yes
   S(2)      Ru        C(14)     101.0(2)   ? ? ? yes
   S(2)      Ru        C(15)     138.4(2)   ? ? ? yes
   C(11)     Ru        C(12)     37.5(2)    ? ? ? yes
   C(11)     Ru        C(13)     62.9(2)    ? ? ? yes
   C(11)     Ru        C(14)     63.7(2)    ? ? ? yes
   C(11)     Ru        C(15)     36.8(2)    ? ? ? yes
   C(12)     Ru        C(13)     37.6(2)    ? ? ? yes
   C(12)     Ru        C(14)     63.6(2)    ? ? ? yes
   C(12)     Ru        C(15)     62.1(2)    ? ? ? yes
   C(13)     Ru        C(14)     38.1(2)    ? ? ? yes
   C(13)     Ru        C(15)     62.8(2)    ? ? ? yes
   C(14)     Ru        C(15)     38.5(2)    ? ? ? yes
   S(1)      Ti        S(2)      95.87(6)   ? ? ? yes
   S(1)      Ti        C(1)      77.3(3)    ? ? ? yes
   S(1)      Ti        C(2)      87.3(3)    ? ? ? yes
   S(1)      Ti        C(3)      120.3(3)   ? ? ? yes
   S(1)      Ti        C(4)      131.8(3)   ? ? ? yes
   S(1)      Ti        C(5)      101.0(4)   ? ? ? yes
   S(1)      Ti        C(6)      90.0(2)    ? ? ? yes
   S(1)      Ti        C(7)      80.2(2)    ? ? ? yes
   S(1)      Ti        C(8)      105.4(2)   ? ? ? yes
   S(1)      Ti        C(9)      135.7(2)   ? ? ? yes
   S(1)      Ti        C(10)     123.6(2)   ? ? ? yes
   S(2)      Ti        C(1)      101.3(3)   ? ? ? yes
   S(2)      Ti        C(2)      131.5(2)   ? ? ? yes
   S(2)      Ti        C(3)      123.1(3)   ? ? ? yes
   S(2)      Ti        C(4)      89.5(3)    ? ? ? yes
   S(2)      Ti        C(5)      77.2(3)    ? ? ? yes
   S(2)      Ti        C(6)      87.2(2)    ? ? ? yes
   S(2)      Ti        C(7)      120.2(3)   ? ? ? yes
   S(2)      Ti        C(8)      136.6(2)   ? ? ? yes
   S(2)      Ti        C(9)      108.3(2)   ? ? ? yes
   S(2)      Ti        C(10)     80.6(2)    ? ? ? yes
   C(1)      Ti        C(2)      32.5(3)    ? ? ? yes
   C(1)      Ti        C(3)      53.9(3)    ? ? ? yes
   C(1)      Ti        C(4)      54.8(4)    ? ? ? yes
   C(1)      Ti        C(5)      32.4(3)    ? ? ? yes
   C(1)      Ti        C(6)      165.3(4)   ? ? ? yes
   C(1)      Ti        C(7)      134.3(4)   ? ? ? yes
   C(1)      Ti        C(8)      119.9(3)   ? ? ? yes
   C(1)      Ti        C(9)      130.2(3)   ? ? ? yes
   C(1)      Ti        C(10)     158.9(3)   ? ? ? yes
   C(2)      Ti        C(3)      33.1(3)    ? ? ? yes
   C(2)      Ti        C(4)      55.7(3)    ? ? ? yes
   C(2)      Ti        C(5)      54.9(3)    ? ? ? yes
   C(2)      Ti        C(6)      141.2(3)   ? ? ? yes
   C(2)      Ti        C(7)      108.0(3)   ? ? ? yes
   C(2)      Ti        C(8)      87.5(3)    ? ? ? yes
   C(2)      Ti        C(9)      102.1(3)   ? ? ? yes
   C(2)      Ti        C(10)     135.7(3)   ? ? ? yes
   C(3)      Ti        C(4)      33.6(3)    ? ? ? yes
   C(3)      Ti        C(5)      55.3(3)    ? ? ? yes
   C(3)      Ti        C(6)      130.4(3)   ? ? ? yes
   C(3)      Ti        C(7)      108.9(3)   ? ? ? yes
   C(3)      Ti        C(8)      77.3(3)    ? ? ? yes
   C(3)      Ti        C(9)      76.3(3)    ? ? ? yes
   C(3)      Ti        C(10)     107.3(3)   ? ? ? yes
   C(4)      Ti        C(5)      34.0(3)    ? ? ? yes
   C(4)      Ti        C(6)      138.1(3)   ? ? ? yes
   C(4)      Ti        C(7)      136.1(4)   ? ? ? yes
   C(4)      Ti        C(8)      102.7(4)   ? ? ? yes
   C(4)      Ti        C(9)      86.0(4)    ? ? ? yes
   C(4)      Ti        C(10)     104.5(3)   ? ? ? yes
   C(5)      Ti        C(6)      161.7(4)   ? ? ? yes
   C(5)      Ti        C(7)      162.5(3)   ? ? ? yes
   C(5)      Ti        C(8)      132.5(3)   ? ? ? yes
   C(5)      Ti        C(9)      119.9(4)   ? ? ? yes
   C(5)      Ti        C(10)     131.7(4)   ? ? ? yes
   C(6)      Ti        C(7)      33.8(2)    ? ? ? yes
   C(6)      Ti        C(8)      56.1(3)    ? ? ? yes
   C(6)      Ti        C(9)      55.9(2)    ? ? ? yes
   C(6)      Ti        C(10)     33.9(2)    ? ? ? yes
   C(7)      Ti        C(8)      33.4(2)    ? ? ? yes
   C(7)      Ti        C(9)      55.7(2)    ? ? ? yes
   C(7)      Ti        C(10)     56.0(3)    ? ? ? yes
   C(8)      Ti        C(9)      33.8(2)    ? ? ? yes
   C(8)      Ti        C(10)     56.1(2)    ? ? ? yes
   C(9)      Ti        C(10)     33.6(2)    ? ? ? yes
   Ru        S(1)      Ti        81.20(6)   ? ? ? yes
   Ru        S(2)      Ti        81.24(6)   ? ? ? yes
   Ti        C(1)      C(2)      74.4(6)    ? ? ? yes
   Ti        C(1)      C(5)      74.7(7)    ? ? ? yes
   C(2)      C(1)      C(5)      111(1)     ? ? ? yes
   Ti        C(2)      C(1)      73.1(6)    ? ? ? yes
   Ti        C(2)      C(3)      73.0(5)    ? ? ? yes
   C(1)      C(2)      C(3)      106.5(9)   ? ? ? yes
   Ti        C(3)      C(2)      73.9(5)    ? ? ? yes
   Ti        C(3)      C(4)      73.4(5)    ? ? ? yes
   C(2)      C(3)      C(4)      109.2(9)   ? ? ? yes
   Ti        C(4)      C(3)      73.0(5)    ? ? ? yes
   Ti        C(4)      C(5)      73.5(5)    ? ? ? yes
   C(3)      C(4)      C(5)      105.9(10)  ? ? ? yes
   Ti        C(5)      C(1)      72.9(6)    ? ? ? yes
   Ti        C(5)      C(4)      72.5(5)    ? ? ? yes
   C(1)      C(5)      C(4)      106.6(10)  ? ? ? yes
   Ti        C(6)      C(7)      73.4(5)    ? ? ? yes
   Ti        C(6)      C(10)     73.4(5)    ? ? ? yes
   C(7)      C(6)      C(10)     107.7(7)   ? ? ? yes
   Ti        C(7)      C(6)      72.8(4)    ? ? ? yes
   Ti        C(7)      C(8)      73.3(5)    ? ? ? yes
   C(6)      C(7)      C(8)      108.6(7)   ? ? ? yes
   Ti        C(8)      C(7)      73.2(4)    ? ? ? yes
   Ti        C(8)      C(9)      72.8(4)    ? ? ? yes
   C(7)      C(8)      C(9)      107.5(7)   ? ? ? yes
   Ti        C(9)      C(8)      73.4(4)    ? ? ? yes
   Ti        C(9)      C(10)     73.5(4)    ? ? ? yes
   C(8)      C(9)      C(10)     108.7(7)   ? ? ? yes
   Ti        C(10)     C(6)      72.7(5)    ? ? ? yes
   Ti        C(10)     C(9)      72.9(4)    ? ? ? yes
   C(6)      C(10)     C(9)      107.5(7)   ? ? ? yes
   Ru        C(11)     C(12)     71.1(3)    ? ? ? yes
   Ru        C(11)     C(15)     71.4(4)    ? ? ? yes
   Ru        C(11)     C(16)     128.0(5)   ? ? ? yes
   C(12)     C(11)     C(15)     108.0(6)   ? ? ? yes
   C(12)     C(11)     C(16)     124.5(6)   ? ? ? yes
   C(15)     C(11)     C(16)     127.2(7)   ? ? ? yes
   Ru        C(12)     C(11)     71.4(4)    ? ? ? yes
   Ru        C(12)     C(13)     70.6(3)    ? ? ? yes
   Ru        C(12)     C(17)     134.2(4)   ? ? ? yes
   C(11)     C(12)     C(13)     108.2(6)   ? ? ? yes
   C(11)     C(12)     C(17)     124.4(6)   ? ? ? yes
   C(13)     C(12)     C(17)     126.0(6)   ? ? ? yes
   Ru        C(13)     C(12)     71.8(3)    ? ? ? yes
   Ru        C(13)     C(14)     70.8(3)    ? ? ? yes
   Ru        C(13)     C(18)     129.7(4)   ? ? ? yes
   C(12)     C(13)     C(14)     108.8(5)   ? ? ? yes
   C(12)     C(13)     C(18)     125.9(6)   ? ? ? yes
   C(14)     C(13)     C(18)     124.8(6)   ? ? ? yes
   Ru        C(14)     C(13)     71.1(3)    ? ? ? yes
   Ru        C(14)     C(15)     71.4(3)    ? ? ? yes
   Ru        C(14)     C(19)     127.3(4)   ? ? ? yes
   C(13)     C(14)     C(15)     105.4(5)   ? ? ? yes
   C(13)     C(14)     C(19)     127.5(6)   ? ? ? yes
   C(15)     C(14)     C(19)     126.7(6)   ? ? ? yes
   Ru        C(15)     C(11)     71.8(4)    ? ? ? yes
   Ru        C(15)     C(14)     70.1(3)    ? ? ? yes
   Ru        C(15)     C(20)     126.0(4)   ? ? ? yes
   C(11)     C(15)     C(14)     109.5(6)   ? ? ? yes
   C(11)     C(15)     C(20)     127.1(7)   ? ? ? yes
   C(14)     C(15)     C(20)     123.4(7)   ? ? ? yes
#------------------------------------------------------------------------------
_publ_requested_journal               ' Journal of the American Chemical Society'

_publ_contact_author
;
    Masanobu Hidai
 Department of Chemistry and Biotechnology, Graduate School of Engineering, The University of Tokyo, Hongo, Bunkyo-ku, Tokyo 113-8656, Japan
;
_publ_contact_letter
;
    -
;

_publ_requested_coeditor_name          ?
_publ_contact_author_phone            ' +81-3-3812-2111 '
_publ_contact_author_fax              ' +81-3-5800-6945 '
_publ_contact_author_email            ' hidai@chembio.t.u-tokyo.ac.jp '
loop_
_publ_author_name
_publ_author_address
' Shin-ichiro Kabashima '
;
Department of Chemistry and Biotechnology, Graduate School of Engineering, The University of Tokyo, Hongo, Bunkyo-ku, Tokyo 113-8656, Japan
;

_publ_section_title
;
    Electron-Deficient Early-Late Heterobimetallic Sulfido Clusters.  Unusual Reactivities of Ti2Ru2S4 Cubane-Type Clusters with Four Cyclopentadienyl Coligands
;

_publ_section_abstract
;
    -
;

_publ_section_experimental
;
    -
;

_publ_section_comment
;
    -
;

_publ_section_references
;
    -
;

_publ_section_figure_captions
;
    -
;


data_[(CpTi)2(Cp*Ru)2S4](4)
#------------------------------------------------------------------------------
_audit_creation_date                  'Sat Apr 18 14:08:52 1998'
_audit_creation_method                'from TEXRAY.INF file'
_audit_update_record                   ?
#------------------------------------------------------------------------------
_computing_data_collection            'Rigaku/AFC Diffractometer Control'
_computing_cell_refinement            'Rigaku/AFC Diffractometer Control'
_computing_data_reduction             'teXsan'
_computing_structure_solution          ?
_computing_structure_refinement       'teXsan'
_computing_publication_material       'teXsan'
_computing_molecular_graphics          ?
#------------------------------------------------------------------------------
_chemical_compound_source              ?
_chemical_name_common                  ?
_chemical_formula_weight               826.83
_chemical_formula_analytical           ?
_chemical_formula_sum                  'C30 H40 S4 Ru2 Ti2 '
_chemical_formula_moiety               'C30 H40 S4 Ru2 Ti2 '
_chemical_formula_structural           ?
_chemical_melting_point                ?
#------------------------------------------------------------------------------
_cell_length_a                         16.799(1)
_cell_length_b                         19.335(2)
_cell_length_c                         10.035(1)
_cell_angle_alpha                      90
_cell_angle_beta                       90
_cell_angle_gamma                      90
_cell_volume                           3259.4(5)
_cell_formula_units_Z                  4
_cell_measurement_temperature          296.2
_cell_measurement_reflns_used          25
_cell_measurement_theta_min            19.6
_cell_measurement_theta_max            20.0
#------------------------------------------------------------------------------
_symmetry_cell_setting                 orthorhombic
_symmetry_space_group_name_H-M        'P n m a      '
_symmetry_Int_Tables_number            62
_symmetry_space_group_name_Hall        ?
loop_
_symmetry_equiv_pos_as_xyz
x,y,z
1/2+x,1/2-y,1/2-z
-x,1/2+y,-z
1/2-x,-y,1/2+z
-x,-y,-z
1/2-x,1/2+y,1/2+z
x,1/2-y,z
1/2+x,y,1/2-z
#------------------------------------------------------------------------------
_exptl_crystal_description            'prismatic'
_exptl_crystal_colour                 'darkred'
_exptl_crystal_size_max                0.400
_exptl_crystal_size_mid                0.300
_exptl_crystal_size_min                0.300
_exptl_crystal_density_diffrn          1.685
_exptl_crystal_density_method         'not measured'
_exptl_crystal_F_000                   1664.00
_exptl_absorpt_coefficient_mu          1.657
_exptl_absorpt_correction_type         psi-scan
_exptl_absorpt_process_details        '(North, Phillips & Mathews, 1968)'
_exptl_absorpt_correction_T_min        0.673
_exptl_absorpt_correction_T_max        0.998
_exptl_special_details
;
 ?
;
#------------------------------------------------------------------------------
_diffrn_special_details
;
 ?
;
_diffrn_ambient_temperature            296.2
_diffrn_radiation_wavelength           0.7107
_diffrn_radiation_type                'Mo K\a'
_diffrn_radiation_source              'Rigaku rotating anode'
_diffrn_radiation_monochromator        graphite
_diffrn_radiation_detector            'scintillation counter'
_diffrn_measurement_device_type       'Rigaku AFC7R'
_diffrn_measurement_method             \w-2\q

_diffrn_standards_number              3
_diffrn_standards_interval_count      150
_diffrn_standards_decay_%             -0.05
loop_
_diffrn_standard_refln_index_h
_diffrn_standard_refln_index_k
_diffrn_standard_refln_index_l
     -3      -1      1
     -2      -2      1
     -2      -2      0
_diffrn_reflns_number                  4202
_reflns_number_total                   4202
_reflns_number_gt                      0
_reflns_observed_expression             >2.0sigma(I)
_diffrn_reflns_av_R_equivalents        0.000
_diffrn_reflns_av_sigmaI/netI          0.041
_diffrn_reflns_limit_h_min             0
_diffrn_reflns_limit_h_max             21
_diffrn_reflns_limit_k_min             0
_diffrn_reflns_limit_k_max             25
_diffrn_reflns_limit_l_min             0
_diffrn_reflns_limit_l_max             13
_diffrn_reflns_theta_min               2.59
_diffrn_reflns_theta_max               27.49
_diffrn_reflns_reduction_process      'Lp corrections applied'
_diffrn_orient_matrix_UB_11            0.00600
_diffrn_orient_matrix_UB_12           -0.05077
_diffrn_orient_matrix_UB_13            0.01616
_diffrn_orient_matrix_UB_21            0.01483
_diffrn_orient_matrix_UB_22            0.00945
_diffrn_orient_matrix_UB_23            0.09478
_diffrn_orient_matrix_UB_31           -0.05734
_diffrn_orient_matrix_UB_32           -0.00287
_diffrn_orient_matrix_UB_33            0.02620
#------------------------------------------------------------------------------
loop_
_atom_type_symbol
_atom_type_description
_atom_type_scat_dispersion_real
_atom_type_scat_imag
_atom_type_scat_source
  'C'  'C'   0.003 0.002 
;International Tables for Crystallography
(1992, Vol. C, Tables 4.2.6.8 and 6.1.1.1)
;
  'H'  'H'   0.000 0.000 
;International Tables for Crystallography
(1992, Vol. C, Table 6.1.1.2)
;
  'S'  'S'   0.125 0.123 
;International Tables for Crystallography
(1992, Vol. C, Tables 4.2.6.8 and 6.1.1.1)
;
  'RuRu'   -1.259 0.836 
;International Tables for Crystallography
(1992, Vol. C, Tables 4.2.6.8 and 6.1.1.1)
;
  'TiTi'   0.278 0.446 
;International Tables for Crystallography
(1992, Vol. C, Tables 4.2.6.8 and 6.1.1.1)
;
#------------------------------------------------------------------------------
loop_
_atom_site_label
_atom_site_type_symbol
_atom_site_fract_x
_atom_site_fract_y
_atom_site_fract_z
_atom_site_U_iso_or_equiv
_atom_site_adp_type
_atom_site_occupancy
_atom_site_calc_flags
_atom_site_refinement_flags
_atom_site_disorder_assembly
_atom_site_disorder_group
 Ru     Ru 0.11571(2)  0.15827(2)  0.09637(3)  0.03863(8)  Uani 1.00 d ...
 Ti(1)  Ti 0.25098(6)  0.2500      0.0367(1)   0.0453(3)   Uani 1.00 d S..
 Ti(2)  Ti 0.16998(6)  0.2500      0.3099(1)   0.0438(3)   Uani 1.00 d S..
 S(1)   S  0.24165(6)  0.16281(6)  0.1992(1)   0.0515(3)   Uani 1.00 d ...
 S(2)   S  0.13032(8)  0.2500      -0.0622(1)  0.0406(4)   Uani 1.00 d S..
 S(3)   S  0.04934(8)  0.2500      0.2099(1)   0.0382(4)   Uani 1.00 d S..
 C(1)   C  0.3908(4)   0.2500      0.0119(6)   0.074(3)    Uani 1.00 d S..
 C(2)   C  0.3624(3)   0.1927(3)   -0.0535(5)  0.076(2)    Uani 1.00 d ...
 C(3)   C  0.3156(3)   0.2147(2)   -0.1586(4)  0.083(2)    Uani 1.00 d ...
 C(4)   C  0.2430(4)   0.2500      0.5078(8)   0.106(4)    Uani 1.00 d S..
 C(5)   C  0.1939(4)   0.1931(3)   0.5125(5)   0.097(2)    Uani 1.00 d ...
 C(6)   C  0.1173(3)   0.2158(3)   0.5157(4)   0.098(2)    Uani 1.00 d ...
 C(7)   C  0.1304(3)   0.0486(2)   0.0423(6)   0.070(2)    Uani 1.00 d ...
 C(8)   C  0.0880(4)   0.0814(3)   -0.0581(5)  0.081(2)    Uani 1.00 d ...
 C(9)   C  0.0164(3)   0.1060(2)   0.0015(7)   0.077(2)    Uani 1.00 d ...
 C(10)  C  0.0168(3)   0.0869(2)   0.1369(6)   0.062(2)    Uani 1.00 d ...
 C(11)  C  0.0871(3)   0.0526(2)   0.1617(5)   0.063(2)    Uani 1.00 d ...
 C(12)  C  0.2092(3)   0.0127(3)   0.0231(9)   0.174(3)    Uani 1.00 d ...
 C(13)  C  0.1102(6)   0.0883(3)   -0.2013(5)  0.226(4)    Uani 1.00 d ...
 C(14)  C  -0.0509(4)  0.1433(3)   -0.0701(9)  0.210(4)    Uani 1.00 d ...
 C(15)  C  -0.0496(3)  0.0991(3)   0.2356(8)   0.169(3)    Uani 1.00 d ...
 C(16)  C  0.1094(5)   0.0215(3)   0.2920(6)   0.161(3)    Uani 1.00 d ...
 H(1)   H  0.4240      0.2500      0.0885      0.0877      Uiso 1.00 calc S..
 H(2)   H  0.3731      0.1460      -0.0306     0.0918      Uiso 1.00 calc ...
 H(3)   H  0.2883      0.1857      -0.2198     0.1000      Uiso 1.00 calc ...
 H(4)   H  0.2997      0.2500      0.5018      0.1265      Uiso 1.00 calc S..
 H(5)   H  0.2107      0.1461      0.5129      0.1180      Uiso 1.00 calc ...
 H(6)   H  0.0715      0.1875      0.5180      0.1183      Uiso 1.00 calc ...
 H(7)   H  0.2255      -0.0068     0.1072      0.2097      Uiso 1.00 calc ...
 H(8)   H  0.2029      -0.0244     -0.0388     0.2097      Uiso 1.00 calc ...
 H(9)   H  0.2475      0.0439      -0.0069     0.2097      Uiso 1.00 calc ...
 H(10)  H  0.1144      0.0445      -0.2411     0.2671      Uiso 1.00 calc ...
 H(11)  H  0.0688      0.1143      -0.2467     0.2671      Uiso 1.00 calc ...
 H(12)  H  0.1585      0.1131      -0.2095     0.2671      Uiso 1.00 calc ...
 H(13)  H  -0.0604     0.1864      -0.0292     0.2622      Uiso 1.00 calc ...
 H(14)  H  -0.0361     0.1501      -0.1609     0.2622      Uiso 1.00 calc ...
 H(15)  H  -0.0974     0.1155      -0.0666     0.2622      Uiso 1.00 calc ...
 H(16)  H  -0.0307     0.1260      0.3073      0.2014      Uiso 1.00 calc ...
 H(17)  H  -0.0915     0.1246      0.1911      0.2014      Uiso 1.00 calc ...
 H(18)  H  -0.0699     0.0567      0.2652      0.2014      Uiso 1.00 calc ...
 H(19)  H  0.0721      -0.0133     0.3155      0.1893      Uiso 1.00 calc ...
 H(20)  H  0.1611      0.0004      0.2840      0.1893      Uiso 1.00 calc ...
 H(21)  H  0.1113      0.0559      0.3583      0.1893      Uiso 1.00 calc ...

loop_
_atom_site_aniso_label
_atom_site_aniso_U_11
_atom_site_aniso_U_22
_atom_site_aniso_U_33
_atom_site_aniso_U_12
_atom_site_aniso_U_13
_atom_site_aniso_U_23
 Ru     0.0375(2)   0.0391(2)   0.0393(2)   0.0045(2)   -0.0018(2)  0.0006(2)  
 Ti(1)  0.0343(6)   0.0688(7)   0.0329(6)   0.0000      0.0010(5)   0.0000     
 Ti(2)  0.0383(6)   0.0627(7)   0.0305(6)   0.0000      -0.0019(5)  0.0000     
 S(1)   0.0404(6)   0.0699(7)   0.0442(6)   0.0127(6)   -0.0041(5)  0.0045(6)  
 S(2)   0.0418(9)   0.0458(8)   0.0343(9)   0.0000      -0.0043(7)  0.0000     
 S(3)   0.0342(8)   0.0402(8)   0.0404(9)   0.0000      0.0025(7)   0.0000     
 C(1)   0.038(4)    0.137(7)    0.046(4)    0.0000      0.002(4)    0.0000     
 C(2)   0.058(3)    0.105(4)    0.065(4)    0.021(3)    0.024(3)    -0.012(3)  
 C(3)   0.055(3)    0.148(6)    0.045(3)    -0.002(3)   0.015(2)    -0.031(3)  
 C(4)   0.046(5)    0.24(1)     0.035(4)    0.0000      -0.011(4)   0.0000     
 C(5)   0.154(7)    0.102(5)    0.036(3)    0.042(5)    -0.008(4)   0.017(3)   
 C(6)   0.102(4)    0.163(7)    0.031(2)    -0.048(4)   -0.002(3)   0.023(3)   
 C(7)   0.057(3)    0.039(3)    0.113(5)    0.001(2)    0.019(3)    -0.014(3)  
 C(8)   0.147(6)    0.043(3)    0.054(3)    -0.027(3)   0.015(4)    -0.010(3)  
 C(9)   0.082(4)    0.031(3)    0.119(5)    -0.008(3)   -0.058(4)   -0.005(3)  
 C(10)  0.056(3)    0.040(3)    0.091(4)    -0.010(2)   0.013(3)    -0.015(3)  
 C(11)  0.089(4)    0.040(3)    0.060(3)    -0.011(3)   -0.004(3)   0.008(2)   
 C(12)  0.080(4)    0.070(4)    0.37(1)     0.010(3)    0.076(6)    -0.046(6)  
 C(13)  0.50(1)     0.124(5)    0.052(4)    -0.165(8)   0.063(7)    -0.039(4)  
 C(14)  0.190(7)    0.082(5)    0.36(1)     -0.032(4)   -0.231(8)   0.023(6)   
 C(15)  0.120(5)    0.088(4)    0.298(10)   -0.059(4)   0.140(6)    -0.085(5)  
 C(16)  0.273(9)    0.087(4)    0.122(5)    -0.080(5)   -0.093(6)   0.057(4)   
#------------------------------------------------------------------------------
_refine_special_details
;
Refinement based on F against all reflections. The weighted R-factor (wR) and
goodness of fit (S) are based on F, conventional R-factors (R) are calculated
on F, with F set to zero for negative F. The threshold expression of
F^2^ > 2sigma(F^2^) is used only for calculating R-factors(gt) etc. thus the
refinement was done using all reflections.  
;

_refine_ls_structure_factor_coef       F
_refine_ls_matrix_type                 full
_refine_ls_weighting_scheme            calc
_refine_ls_weighting_details
   'w = 1/[\s^2^(Fo) + 0.00000|Fo|^2^]'
_refine_ls_hydrogen_treatment          noref
_refine_ls_extinction_method           
   'Zachariasen(1967) type 2 Gaussian isotropic'
_refine_ls_extinction_coef             0.00088(6)
_refine_ls_abs_structure_details       ?
_refine_ls_abs_structure_Flack         ?
_refine_ls_number_reflns               2723
_refine_ls_number_parameters           182
_refine_ls_number_restraints           0
_refine_ls_number_constraints          0
_refine_ls_R_factor_all                0.0000
_refine_ls_R_factor_gt                 0.0000
_refine_ls_wR_factor_all               ?
_refine_ls_wR_factor_ref               0.0240
_refine_ls_wR_factor_gt                0.0000
_refine_ls_goodness_of_fit_all         ?
_refine_ls_goodness_of_fit_ref         2.704
_refine_ls_shift/su_max                0.0290
_refine_ls_shift/su_mean               0.0040
_refine_diff_density_min               -0.39
_refine_diff_density_max               0.47
#------------------------------------------------------------------------------
_geom_special_details
;
 ?
;
loop_
_geom_bond_atom_site_label_1
_geom_bond_atom_site_label_2
_geom_bond_distance
_geom_bond_site_symmetry_1
_geom_bond_site_symmetry_2
_geom_bond_publ_flag
 Ru        Ti(1)     2.9440(8)  1_555 1_555 yes
 Ru        Ti(2)     2.9269(8)  1_555 1_555 yes
 Ru        S(1)      2.356(1)   1_555 1_555 yes
 Ru        S(2)      2.3956(9)  1_555 1_555 yes
 Ru        S(3)      2.385(1)   1_555 1_555 yes
 Ru        C(7)      2.203(4)   1_555 1_555 yes
 Ru        C(8)      2.197(4)   1_555 1_555 yes
 Ru        C(9)      2.171(4)   1_555 1_555 yes
 Ru        C(10)     2.197(4)   1_555 1_555 yes
 Ru        C(11)     2.198(4)   1_555 1_555 yes
 Ti(1)     Ti(2)     3.060(1)   1_555 1_555 yes
 Ti(1)     S(1)      2.351(1)   1_555 1_555 yes
 Ti(1)     S(1)      2.351(1)   1_555 7_555 yes
 Ti(1)     S(2)      2.257(2)   1_555 1_555 yes
 Ti(1)     C(1)      2.361(6)   1_555 1_555 yes
 Ti(1)     C(2)      2.356(4)   1_555 1_555 yes
 Ti(1)     C(2)      2.356(4)   1_555 7_555 yes
 Ti(1)     C(3)      2.342(4)   1_555 1_555 yes
 Ti(1)     C(3)      2.342(4)   1_555 7_555 yes
 Ti(2)     S(1)      2.350(1)   1_555 1_555 yes
 Ti(2)     S(1)      2.350(1)   1_555 7_555 yes
 Ti(2)     S(3)      2.261(2)   1_555 1_555 yes
 Ti(2)     C(4)      2.335(7)   1_555 1_555 yes
 Ti(2)     C(5)      2.347(5)   1_555 1_555 yes
 Ti(2)     C(5)      2.347(5)   1_555 7_555 yes
 Ti(2)     C(6)      2.342(4)   1_555 1_555 yes
 Ti(2)     C(6)      2.342(4)   1_555 7_555 yes
 C(1)      C(2)      1.372(6)   1_555 1_555 yes
 C(1)      C(2)      1.372(6)   1_555 7_555 yes
 C(2)      C(3)      1.382(6)   1_555 1_555 yes
 C(3)      C(3)      1.367(10)  1_555 7_555 yes
 C(4)      C(5)      1.377(7)   1_555 1_555 yes
 C(4)      C(5)      1.377(7)   1_555 7_555 yes
 C(5)      C(6)      1.359(7)   1_555 1_555 yes
 C(6)      C(6)      1.32(1)    1_555 7_555 yes
 C(7)      C(8)      1.387(6)   1_555 1_555 yes
 C(7)      C(11)     1.404(6)   1_555 1_555 yes
 C(7)      C(12)     1.507(6)   1_555 1_555 yes
 C(8)      C(9)      1.425(7)   1_555 1_555 yes
 C(8)      C(13)     1.491(7)   1_555 1_555 yes
 C(9)      C(10)     1.408(7)   1_555 1_555 yes
 C(9)      C(14)     1.522(6)   1_555 1_555 yes
 C(10)     C(11)     1.377(6)   1_555 1_555 yes
 C(10)     C(15)     1.510(6)   1_555 1_555 yes
 C(11)     C(16)     1.488(6)   1_555 1_555 yes
#------------------------------------------------------------------------------
loop_
_geom_angle_atom_site_label_1
_geom_angle_atom_site_label_2
_geom_angle_atom_site_label_3
_geom_angle
_geom_angle_site_symmetry_1
_geom_angle_site_symmetry_2
_geom_angle_site_symmetry_3
_geom_angle_publ_flag
   Ti(1)     Ru        Ti(2)     62.83(3)   1_555 1_555 1_555 yes
   Ti(1)     Ru        S(1)      51.20(3)   1_555 1_555 1_555 yes
   Ti(1)     Ru        S(2)      48.69(4)   1_555 1_555 1_555 yes
   Ti(1)     Ru        S(3)      90.57(3)   1_555 1_555 1_555 yes
   Ti(1)     Ru        C(7)      116.3(1)   1_555 1_555 1_555 yes
   Ti(1)     Ru        C(8)      115.3(1)   1_555 1_555 1_555 yes
   Ti(1)     Ru        C(9)      141.7(2)   1_555 1_555 1_555 yes
   Ti(1)     Ru        C(10)     178.0(1)   1_555 1_555 1_555 yes
   Ti(1)     Ru        C(11)     142.1(1)   1_555 1_555 1_555 yes
   Ti(2)     Ru        S(1)      51.46(3)   1_555 1_555 1_555 yes
   Ti(2)     Ru        S(2)      90.34(3)   1_555 1_555 1_555 yes
   Ti(2)     Ru        S(3)      49.10(4)   1_555 1_555 1_555 yes
   Ti(2)     Ru        C(7)      136.8(2)   1_555 1_555 1_555 yes
   Ti(2)     Ru        C(8)      172.8(2)   1_555 1_555 1_555 yes
   Ti(2)     Ru        C(9)      147.4(2)   1_555 1_555 1_555 yes
   Ti(2)     Ru        C(10)     118.7(1)   1_555 1_555 1_555 yes
   Ti(2)     Ru        C(11)     114.4(1)   1_555 1_555 1_555 yes
   S(1)      Ru        S(2)      99.88(4)   1_555 1_555 1_555 yes
   S(1)      Ru        S(3)      100.54(4)  1_555 1_555 1_555 yes
   S(1)      Ru        C(7)      92.5(1)    1_555 1_555 1_555 yes
   S(1)      Ru        C(8)      121.6(2)   1_555 1_555 1_555 yes
   S(1)      Ru        C(9)      154.1(1)   1_555 1_555 1_555 yes
   S(1)      Ru        C(10)     128.4(2)   1_555 1_555 1_555 yes
   S(1)      Ru        C(11)     95.8(1)    1_555 1_555 1_555 yes
   S(2)      Ru        S(3)      79.32(4)   1_555 1_555 1_555 yes
   S(2)      Ru        C(7)      122.5(2)   1_555 1_555 1_555 yes
   S(2)      Ru        C(8)      93.1(1)    1_555 1_555 1_555 yes
   S(2)      Ru        C(9)      97.6(2)    1_555 1_555 1_555 yes
   S(2)      Ru        C(10)     131.7(2)   1_555 1_555 1_555 yes
   S(2)      Ru        C(11)     155.3(1)   1_555 1_555 1_555 yes
   S(3)      Ru        C(7)      152.4(1)   1_555 1_555 1_555 yes
   S(3)      Ru        C(8)      137.8(2)   1_555 1_555 1_555 yes
   S(3)      Ru        C(9)      101.3(2)   1_555 1_555 1_555 yes
   S(3)      Ru        C(10)     91.4(1)    1_555 1_555 1_555 yes
   S(3)      Ru        C(11)     116.5(1)   1_555 1_555 1_555 yes
   C(7)      Ru        C(8)      36.8(2)    1_555 1_555 1_555 yes
   C(7)      Ru        C(9)      62.0(2)    1_555 1_555 1_555 yes
   C(7)      Ru        C(10)     61.7(2)    1_555 1_555 1_555 yes
   C(7)      Ru        C(11)     37.2(2)    1_555 1_555 1_555 yes
   C(8)      Ru        C(9)      38.1(2)    1_555 1_555 1_555 yes
   C(8)      Ru        C(10)     63.0(2)    1_555 1_555 1_555 yes
   C(8)      Ru        C(11)     62.3(2)    1_555 1_555 1_555 yes
   C(9)      Ru        C(10)     37.6(2)    1_555 1_555 1_555 yes
   C(9)      Ru        C(11)     62.0(2)    1_555 1_555 1_555 yes
   C(10)     Ru        C(11)     36.5(2)    1_555 1_555 1_555 yes
   Ru        Ti(1)     Ru        74.08(3)   1_555 1_555 7_555 yes
   Ru        Ti(1)     Ti(2)     58.31(2)   1_555 1_555 1_555 yes
   Ru        Ti(1)     S(1)      51.35(3)   1_555 1_555 1_555 yes
   Ru        Ti(1)     S(1)      103.86(4)  1_555 1_555 7_555 yes
   Ru        Ti(1)     S(2)      52.86(3)   1_555 1_555 1_555 yes
   Ru        Ti(1)     C(1)      142.10(3)  1_555 1_555 1_555 yes
   Ru        Ti(1)     C(2)      114.1(1)   1_555 1_555 1_555 yes
   Ru        Ti(1)     C(2)      167.0(1)   1_555 1_555 7_555 yes
   Ru        Ti(1)     C(3)      110.6(1)   1_555 1_555 1_555 yes
   Ru        Ti(1)     C(3)      134.7(1)   1_555 1_555 7_555 yes
   Ru        Ti(1)     Ti(2)     58.31(2)   7_555 1_555 1_555 yes
   Ru        Ti(1)     S(1)      103.86(4)  7_555 1_555 1_555 yes
   Ru        Ti(1)     S(1)      51.35(3)   7_555 1_555 7_555 yes
   Ru        Ti(1)     S(2)      52.86(3)   7_555 1_555 1_555 yes
   Ru        Ti(1)     C(1)      142.10(3)  7_555 1_555 1_555 yes
   Ru        Ti(1)     C(2)      167.0(1)   7_555 1_555 1_555 yes
   Ru        Ti(1)     C(2)      114.1(1)   7_555 1_555 7_555 yes
   Ru        Ti(1)     C(3)      134.7(1)   7_555 1_555 1_555 yes
   Ru        Ti(1)     C(3)      110.6(1)   7_555 1_555 7_555 yes
   Ti(2)     Ti(1)     S(1)      49.38(3)   1_555 1_555 1_555 yes
   Ti(2)     Ti(1)     S(1)      49.38(3)   1_555 1_555 7_555 yes
   Ti(2)     Ti(1)     S(2)      89.70(5)   1_555 1_555 1_555 yes
   Ti(2)     Ti(1)     C(1)      122.5(2)   1_555 1_555 1_555 yes
   Ti(2)     Ti(1)     C(2)      134.2(1)   1_555 1_555 1_555 yes
   Ti(2)     Ti(1)     C(2)      134.2(1)   1_555 1_555 7_555 yes
   Ti(2)     Ti(1)     C(3)      162.8(1)   1_555 1_555 1_555 yes
   Ti(2)     Ti(1)     C(3)      162.8(1)   1_555 1_555 7_555 yes
   S(1)      Ti(1)     S(1)      91.64(6)   1_555 1_555 7_555 yes
   S(1)      Ti(1)     S(2)      104.20(5)  1_555 1_555 1_555 yes
   S(1)      Ti(1)     C(1)      98.0(1)    1_555 1_555 1_555 yes
   S(1)      Ti(1)     C(2)      89.0(1)    1_555 1_555 1_555 yes
   S(1)      Ti(1)     C(2)      131.0(1)   1_555 1_555 7_555 yes
   S(1)      Ti(1)     C(3)      113.7(1)   1_555 1_555 1_555 yes
   S(1)      Ti(1)     C(3)      145.1(1)   1_555 1_555 7_555 yes
   S(1)      Ti(1)     S(2)      104.20(5)  7_555 1_555 1_555 yes
   S(1)      Ti(1)     C(1)      98.0(1)    7_555 1_555 1_555 yes
   S(1)      Ti(1)     C(2)      131.0(1)   7_555 1_555 1_555 yes
   S(1)      Ti(1)     C(2)      89.0(1)    7_555 1_555 7_555 yes
   S(1)      Ti(1)     C(3)      145.1(1)   7_555 1_555 1_555 yes
   S(1)      Ti(1)     C(3)      113.7(1)   7_555 1_555 7_555 yes
   S(2)      Ti(1)     C(1)      147.8(2)   1_555 1_555 1_555 yes
   S(2)      Ti(1)     C(2)      123.0(1)   1_555 1_555 1_555 yes
   S(2)      Ti(1)     C(2)      123.0(1)   1_555 1_555 7_555 yes
   S(2)      Ti(1)     C(3)      92.8(1)    1_555 1_555 1_555 yes
   S(2)      Ti(1)     C(3)      92.8(1)    1_555 1_555 7_555 yes
   C(1)      Ti(1)     C(2)      33.8(1)    1_555 1_555 1_555 yes
   C(1)      Ti(1)     C(2)      33.8(1)    1_555 1_555 7_555 yes
   C(1)      Ti(1)     C(3)      56.7(2)    1_555 1_555 1_555 yes
   C(1)      Ti(1)     C(3)      56.7(2)    1_555 1_555 7_555 yes
   C(2)      Ti(1)     C(2)      56.1(3)    1_555 1_555 7_555 yes
   C(2)      Ti(1)     C(3)      34.2(1)    1_555 1_555 1_555 yes
   C(2)      Ti(1)     C(3)      56.4(1)    1_555 1_555 7_555 yes
   C(2)      Ti(1)     C(3)      56.4(1)    7_555 1_555 1_555 yes
   C(2)      Ti(1)     C(3)      34.2(1)    7_555 1_555 7_555 yes
   C(3)      Ti(1)     C(3)      33.9(2)    1_555 1_555 7_555 yes
   Ru        Ti(2)     Ru        74.59(3)   1_555 1_555 7_555 yes
   Ru        Ti(2)     Ti(1)     58.86(2)   1_555 1_555 1_555 yes
   Ru        Ti(2)     S(1)      51.62(3)   1_555 1_555 1_555 yes
   Ru        Ti(2)     S(1)      104.38(4)  1_555 1_555 7_555 yes
   Ru        Ti(2)     S(3)      52.85(3)   1_555 1_555 1_555 yes
   Ru        Ti(2)     C(4)      141.86(4)  1_555 1_555 1_555 yes
   Ru        Ti(2)     C(5)      113.8(2)   1_555 1_555 1_555 yes
   Ru        Ti(2)     C(5)      166.3(2)   1_555 1_555 7_555 yes
   Ru        Ti(2)     C(6)      110.9(1)   1_555 1_555 1_555 yes
   Ru        Ti(2)     C(6)      134.3(1)   1_555 1_555 7_555 yes
   Ru        Ti(2)     Ti(1)     58.86(2)   7_555 1_555 1_555 yes
   Ru        Ti(2)     S(1)      104.38(4)  7_555 1_555 1_555 yes
   Ru        Ti(2)     S(1)      51.62(3)   7_555 1_555 7_555 yes
   Ru        Ti(2)     S(3)      52.85(3)   7_555 1_555 1_555 yes
   Ru        Ti(2)     C(4)      141.86(4)  7_555 1_555 1_555 yes
   Ru        Ti(2)     C(5)      166.3(2)   7_555 1_555 1_555 yes
   Ru        Ti(2)     C(5)      113.8(2)   7_555 1_555 7_555 yes
   Ru        Ti(2)     C(6)      134.3(1)   7_555 1_555 1_555 yes
   Ru        Ti(2)     C(6)      110.9(1)   7_555 1_555 7_555 yes
   Ti(1)     Ti(2)     S(1)      49.39(3)   1_555 1_555 1_555 yes
   Ti(1)     Ti(2)     S(1)      49.39(3)   1_555 1_555 7_555 yes
   Ti(1)     Ti(2)     S(3)      90.06(5)   1_555 1_555 1_555 yes
   Ti(1)     Ti(2)     C(4)      121.9(2)   1_555 1_555 1_555 yes
   Ti(1)     Ti(2)     C(5)      134.4(2)   1_555 1_555 1_555 yes
   Ti(1)     Ti(2)     C(5)      134.4(2)   1_555 1_555 7_555 yes
   Ti(1)     Ti(2)     C(6)      163.3(1)   1_555 1_555 1_555 yes
   Ti(1)     Ti(2)     C(6)      163.3(1)   1_555 1_555 7_555 yes
   S(1)      Ti(2)     S(1)      91.66(6)   1_555 1_555 7_555 yes
   S(1)      Ti(2)     S(3)      104.45(5)  1_555 1_555 1_555 yes
   S(1)      Ti(2)     C(4)      97.6(1)    1_555 1_555 1_555 yes
   S(1)      Ti(2)     C(5)      89.2(2)    1_555 1_555 1_555 yes
   S(1)      Ti(2)     C(5)      131.2(2)   1_555 1_555 7_555 yes
   S(1)      Ti(2)     C(6)      114.1(1)   1_555 1_555 1_555 yes
   S(1)      Ti(2)     C(6)      144.3(1)   1_555 1_555 7_555 yes
   S(1)      Ti(2)     S(3)      104.45(5)  7_555 1_555 1_555 yes
   S(1)      Ti(2)     C(4)      97.6(1)    7_555 1_555 1_555 yes
   S(1)      Ti(2)     C(5)      131.2(2)   7_555 1_555 1_555 yes
   S(1)      Ti(2)     C(5)      89.2(2)    7_555 1_555 7_555 yes
   S(1)      Ti(2)     C(6)      144.3(1)   7_555 1_555 1_555 yes
   S(1)      Ti(2)     C(6)      114.1(1)   7_555 1_555 7_555 yes
   S(3)      Ti(2)     C(4)      148.0(2)   1_555 1_555 1_555 yes
   S(3)      Ti(2)     C(5)      122.5(2)   1_555 1_555 1_555 yes
   S(3)      Ti(2)     C(5)      122.5(2)   1_555 1_555 7_555 yes
   S(3)      Ti(2)     C(6)      93.0(1)    1_555 1_555 1_555 yes
   S(3)      Ti(2)     C(6)      93.0(1)    1_555 1_555 7_555 yes
   C(4)      Ti(2)     C(5)      34.2(2)    1_555 1_555 1_555 yes
   C(4)      Ti(2)     C(5)      34.2(2)    1_555 1_555 7_555 yes
   C(4)      Ti(2)     C(6)      56.5(2)    1_555 1_555 1_555 yes
   C(4)      Ti(2)     C(6)      56.5(2)    1_555 1_555 7_555 yes
   C(5)      Ti(2)     C(5)      55.9(3)    1_555 1_555 7_555 yes
   C(5)      Ti(2)     C(6)      33.7(2)    1_555 1_555 1_555 yes
   C(5)      Ti(2)     C(6)      55.4(2)    1_555 1_555 7_555 yes
   C(5)      Ti(2)     C(6)      55.4(2)    7_555 1_555 1_555 yes
   C(5)      Ti(2)     C(6)      33.7(2)    7_555 1_555 7_555 yes
   C(6)      Ti(2)     C(6)      32.8(3)    1_555 1_555 7_555 yes
   Ru        S(1)      Ti(1)     77.44(4)   1_555 1_555 1_555 yes
   Ru        S(1)      Ti(2)     76.92(4)   1_555 1_555 1_555 yes
   Ti(1)     S(1)      Ti(2)     81.22(4)   1_555 1_555 1_555 yes
   Ru        S(2)      Ru        95.52(5)   1_555 1_555 7_555 yes
   Ru        S(2)      Ti(1)     78.44(4)   1_555 1_555 1_555 yes
   Ru        S(2)      Ti(1)     78.44(4)   7_555 1_555 1_555 yes
   Ru        S(3)      Ru        96.10(5)   1_555 1_555 7_555 yes
   Ru        S(3)      Ti(2)     78.05(4)   1_555 1_555 1_555 yes
   Ru        S(3)      Ti(2)     78.05(4)   7_555 1_555 1_555 yes
   Ti(1)     C(1)      C(2)      72.9(3)    1_555 1_555 1_555 yes
   Ti(1)     C(1)      C(2)      72.9(3)    1_555 1_555 7_555 yes
   Ti(1)     C(1)      H(1)      119.9(5)   1_555 1_555 1_555 no
   C(2)      C(1)      C(2)      107.6(6)   1_555 1_555 7_555 yes
   C(2)      C(1)      H(1)      126.2(3)   1_555 1_555 1_555 no
   C(2)      C(1)      H(1)      126.2(3)   7_555 1_555 1_555 no
   Ti(1)     C(2)      C(1)      73.3(3)    1_555 1_555 1_555 yes
   Ti(1)     C(2)      C(3)      72.4(3)    1_555 1_555 1_555 yes
   Ti(1)     C(2)      H(2)      120.3(3)   1_555 1_555 1_555 no
   C(1)      C(2)      C(3)      108.3(5)   1_555 1_555 1_555 yes
   C(1)      C(2)      H(2)      125.9(5)   1_555 1_555 1_555 no
   C(3)      C(2)      H(2)      125.7(5)   1_555 1_555 1_555 no
   Ti(1)     C(3)      C(2)      73.4(2)    1_555 1_555 1_555 yes
   Ti(1)     C(3)      C(3)      73.0(1)    1_555 1_555 7_555 yes
   Ti(1)     C(3)      H(3)      119.3(3)   1_555 1_555 1_555 no
   C(2)      C(3)      C(3)      107.9(3)   1_555 1_555 7_555 yes
   C(2)      C(3)      H(3)      126.0(5)   1_555 1_555 1_555 no
   C(3)      C(3)      H(3)      126.1(3)   7_555 1_555 1_555 no
   Ti(2)     C(4)      C(5)      73.4(4)    1_555 1_555 1_555 yes
   Ti(2)     C(4)      C(5)      73.4(4)    1_555 1_555 7_555 yes
   Ti(2)     C(4)      H(4)      118.0(6)   1_555 1_555 1_555 no
   C(5)      C(4)      C(5)      106.2(8)   1_555 1_555 7_555 yes
   C(5)      C(4)      H(4)      126.9(4)   1_555 1_555 1_555 no
   C(5)      C(4)      H(4)      126.9(4)   7_555 1_555 1_555 no
   Ti(2)     C(5)      C(4)      72.4(4)    1_555 1_555 1_555 yes
   Ti(2)     C(5)      C(6)      73.0(3)    1_555 1_555 1_555 yes
   Ti(2)     C(5)      H(5)      120.1(4)   1_555 1_555 1_555 no
   C(4)      C(5)      C(6)      108.0(6)   1_555 1_555 1_555 yes
   C(4)      C(5)      H(5)      125.8(7)   1_555 1_555 1_555 no
   C(6)      C(5)      H(5)      126.2(7)   1_555 1_555 1_555 no
   Ti(2)     C(6)      C(5)      73.4(3)    1_555 1_555 1_555 yes
   Ti(2)     C(6)      C(6)      73.6(1)    1_555 1_555 7_555 yes
   Ti(2)     C(6)      H(6)      119.5(3)   1_555 1_555 1_555 no
   C(5)      C(6)      C(6)      108.9(4)   1_555 1_555 7_555 yes
   C(5)      C(6)      H(6)      125.7(7)   1_555 1_555 1_555 no
   C(6)      C(6)      H(6)      125.4(4)   7_555 1_555 1_555 no
   Ru        C(7)      C(8)      71.4(3)    1_555 1_555 1_555 yes
   Ru        C(7)      C(11)     71.2(3)    1_555 1_555 1_555 yes
   Ru        C(7)      C(12)     125.0(3)   1_555 1_555 1_555 yes
   C(8)      C(7)      C(11)     109.1(4)   1_555 1_555 1_555 yes
   C(8)      C(7)      C(12)     124.7(6)   1_555 1_555 1_555 yes
   C(11)     C(7)      C(12)     126.2(6)   1_555 1_555 1_555 yes
   Ru        C(8)      C(7)      71.8(3)    1_555 1_555 1_555 yes
   Ru        C(8)      C(9)      70.0(3)    1_555 1_555 1_555 yes
   Ru        C(8)      C(13)     124.4(4)   1_555 1_555 1_555 yes
   C(7)      C(8)      C(9)      106.4(5)   1_555 1_555 1_555 yes
   C(7)      C(8)      C(13)     127.7(7)   1_555 1_555 1_555 yes
   C(9)      C(8)      C(13)     125.9(7)   1_555 1_555 1_555 yes
   Ru        C(9)      C(8)      72.0(3)    1_555 1_555 1_555 yes
   Ru        C(9)      C(10)     72.2(3)    1_555 1_555 1_555 yes
   Ru        C(9)      C(14)     123.9(3)   1_555 1_555 1_555 yes
   C(8)      C(9)      C(10)     108.3(5)   1_555 1_555 1_555 yes
   C(8)      C(9)      C(14)     126.0(7)   1_555 1_555 1_555 yes
   C(10)     C(9)      C(14)     125.7(7)   1_555 1_555 1_555 yes
   Ru        C(10)     C(9)      70.2(3)    1_555 1_555 1_555 yes
   Ru        C(10)     C(11)     71.8(3)    1_555 1_555 1_555 yes
   Ru        C(10)     C(15)     125.6(3)   1_555 1_555 1_555 yes
   C(9)      C(10)     C(11)     107.8(5)   1_555 1_555 1_555 yes
   C(9)      C(10)     C(15)     126.0(6)   1_555 1_555 1_555 yes
   C(11)     C(10)     C(15)     126.1(6)   1_555 1_555 1_555 yes
   Ru        C(11)     C(7)      71.6(3)    1_555 1_555 1_555 yes
   Ru        C(11)     C(10)     71.7(3)    1_555 1_555 1_555 yes
   Ru        C(11)     C(16)     125.7(3)   1_555 1_555 1_555 yes
   C(7)      C(11)     C(10)     108.5(4)   1_555 1_555 1_555 yes
   C(7)      C(11)     C(16)     126.7(6)   1_555 1_555 1_555 yes
   C(10)     C(11)     C(16)     124.8(6)   1_555 1_555 1_555 yes
   C(7)      C(12)     H(7)      108.5(6)   1_555 1_555 1_555 no
   C(7)      C(12)     H(8)      109.5(5)   1_555 1_555 1_555 no
   C(7)      C(12)     H(9)      110.5(5)   1_555 1_555 1_555 no
   H(7)      C(12)     H(8)      108.0(5)   1_555 1_555 1_555 no
   H(7)      C(12)     H(9)      109.7(6)   1_555 1_555 1_555 no
   H(8)      C(12)     H(9)      110.6(7)   1_555 1_555 1_555 no
   C(8)      C(13)     H(10)     110.3(5)   1_555 1_555 1_555 no
   C(8)      C(13)     H(11)     108.6(8)   1_555 1_555 1_555 no
   C(8)      C(13)     H(12)     110.2(6)   1_555 1_555 1_555 no
   H(10)     C(13)     H(11)     108.6(7)   1_555 1_555 1_555 no
   H(10)     C(13)     H(12)     110.9(9)   1_555 1_555 1_555 no
   H(11)     C(13)     H(12)     108.2(6)   1_555 1_555 1_555 no
   C(9)      C(14)     H(13)     109.8(5)   1_555 1_555 1_555 no
   C(9)      C(14)     H(14)     108.8(7)   1_555 1_555 1_555 no
   C(9)      C(14)     H(15)     109.0(5)   1_555 1_555 1_555 no
   H(13)     C(14)     H(14)     109.8(6)   1_555 1_555 1_555 no
   H(13)     C(14)     H(15)     110.2(9)   1_555 1_555 1_555 no
   H(14)     C(14)     H(15)     109.2(6)   1_555 1_555 1_555 no
   C(10)     C(15)     H(16)     109.7(5)   1_555 1_555 1_555 no
   C(10)     C(15)     H(17)     108.3(7)   1_555 1_555 1_555 no
   C(10)     C(15)     H(18)     110.0(5)   1_555 1_555 1_555 no
   H(16)     C(15)     H(17)     108.4(5)   1_555 1_555 1_555 no
   H(16)     C(15)     H(18)     111.3(8)   1_555 1_555 1_555 no
   H(17)     C(15)     H(18)     109.1(6)   1_555 1_555 1_555 no
   C(11)     C(16)     H(19)     109.8(5)   1_555 1_555 1_555 no
   C(11)     C(16)     H(20)     108.9(6)   1_555 1_555 1_555 no
   C(11)     C(16)     H(21)     110.1(5)   1_555 1_555 1_555 no
   H(19)     C(16)     H(20)     108.5(5)   1_555 1_555 1_555 no
   H(19)     C(16)     H(21)     110.3(7)   1_555 1_555 1_555 no
   H(20)     C(16)     H(21)     109.1(6)   1_555 1_555 1_555 no
#------------------------------------------------------------------------------
loop_
_geom_torsion_atom_site_label_1
_geom_torsion_atom_site_label_2
_geom_torsion_atom_site_label_3
_geom_torsion_atom_site_label_4
_geom_torsion
_geom_torsion_site_symmetry_1
_geom_torsion_site_symmetry_2
_geom_torsion_site_symmetry_3
_geom_torsion_site_symmetry_4
_geom_torsion_publ_flag
   Ru      Ti(1)   Ru      Ti(2)   62.23(2) 1_555 1_555 7_555 1_555 yes
   Ru      Ti(1)   Ru      S(1)    123.16(4) 1_555 1_555 7_555 7_555 yes
   Ru      Ti(1)   Ru      S(2)    -55.14(3) 1_555 1_555 7_555 1_555 yes
   Ru      Ti(1)   Ru      S(3)    20.06(4) 1_555 1_555 7_555 1_555 yes
   Ru      Ti(1)   Ru      C(7)    -166.5(2) 1_555 1_555 7_555 7_555 yes
   Ru      Ti(1)   Ru      C(8)    -125.5(2) 1_555 1_555 7_555 7_555 yes
   Ru      Ti(1)   Ru      C(9)    -89.2(2) 1_555 1_555 7_555 7_555 yes
   Ru      Ti(1)   Ru      C(10)   -157(4)  1_555 1_555 7_555 7_555 yes
   Ru      Ti(1)   Ru      C(11)   157.7(2) 1_555 1_555 7_555 7_555 yes
   Ru      Ti(1)   Ti(2)   S(1)    64.06(3) 1_555 1_555 1_555 1_555 yes
   Ru      Ti(1)   Ti(2)   S(1)    -154.19(5) 1_555 1_555 1_555 7_555 yes
   Ru      Ti(1)   Ti(2)   S(3)    -45.07(1) 1_555 1_555 1_555 1_555 yes
   Ru      Ti(1)   Ti(2)   C(4)    134.93(1) 1_555 1_555 1_555 1_555 yes
   Ru      Ti(1)   Ti(2)   C(5)    93.9(2)  1_555 1_555 1_555 1_555 yes
   Ru      Ti(1)   Ti(2)   C(5)    176.0(2) 1_555 1_555 1_555 7_555 yes
   Ru      Ti(1)   Ti(2)   C(6)    55.8(5)  1_555 1_555 1_555 1_555 yes
   Ru      Ti(1)   Ti(2)   C(6)    -145.9(5) 1_555 1_555 1_555 7_555 yes
   Ru      Ti(1)   S(1)    Ti(2)   -78.45(3) 1_555 1_555 1_555 1_555 yes
   Ru      Ti(1)   S(1)    Ti(2)   22.43(4) 1_555 1_555 7_555 1_555 yes
   Ru      Ti(1)   C(1)    C(2)    43.7(5)  1_555 1_555 1_555 1_555 yes
   Ru      Ti(1)   C(1)    C(2)    158.9(2) 1_555 1_555 1_555 7_555 yes
   Ru      Ti(1)   C(2)    C(1)    -152.3(3) 1_555 1_555 1_555 1_555 yes
   Ru      Ti(1)   C(2)    C(3)    91.6(3)  1_555 1_555 1_555 1_555 yes
   Ru      Ti(1)   C(2)    C(1)    -80.5(6) 1_555 1_555 7_555 1_555 yes
   Ru      Ti(1)   C(2)    C(3)    35.6(8)  1_555 1_555 7_555 7_555 yes
   Ru      Ti(1)   C(3)    C(2)    -102.9(3) 1_555 1_555 1_555 1_555 yes
   Ru      Ti(1)   C(3)    C(3)    141.96(8) 1_555 1_555 1_555 7_555 yes
   Ru      Ti(1)   C(3)    C(2)    -169.4(2) 1_555 1_555 7_555 7_555 yes
   Ru      Ti(1)   C(3)    C(3)    -54.2(1) 1_555 1_555 7_555 1_555 yes
   Ru      Ti(2)   Ru      Ti(1)   -62.60(2) 1_555 1_555 7_555 1_555 yes
   Ru      Ti(2)   Ru      S(1)    -123.16(4) 1_555 1_555 7_555 7_555 yes
   Ru      Ti(2)   Ru      S(2)    -20.76(4) 1_555 1_555 7_555 1_555 yes
   Ru      Ti(2)   Ru      S(3)    54.75(4) 1_555 1_555 7_555 1_555 yes
   Ru      Ti(2)   Ru      C(7)    -163.0(2) 1_555 1_555 7_555 7_555 yes
   Ru      Ti(2)   Ru      C(8)    -139(1)  1_555 1_555 7_555 7_555 yes
   Ru      Ti(2)   Ru      C(9)    84.0(3)  1_555 1_555 7_555 7_555 yes
   Ru      Ti(2)   Ru      C(10)   118.9(2) 1_555 1_555 7_555 7_555 yes
   Ru      Ti(2)   Ru      C(11)   159.6(2) 1_555 1_555 7_555 7_555 yes
   Ru      Ti(2)   Ti(1)   S(1)    -64.06(3) 1_555 1_555 1_555 1_555 yes
   Ru      Ti(2)   Ti(1)   S(1)    154.19(5) 1_555 1_555 1_555 7_555 yes
   Ru      Ti(2)   Ti(1)   S(2)    45.07(1) 1_555 1_555 1_555 1_555 yes
   Ru      Ti(2)   Ti(1)   C(1)    -134.93(1) 1_555 1_555 1_555 1_555 yes
   Ru      Ti(2)   Ti(1)   C(2)    -93.9(2) 1_555 1_555 1_555 1_555 yes
   Ru      Ti(2)   Ti(1)   C(2)    -175.9(2) 1_555 1_555 1_555 7_555 yes
   Ru      Ti(2)   Ti(1)   C(3)    -53.3(4) 1_555 1_555 1_555 1_555 yes
   Ru      Ti(2)   Ti(1)   C(3)    143.5(4) 1_555 1_555 1_555 7_555 yes
   Ru      Ti(2)   S(1)    Ti(1)   79.05(4) 1_555 1_555 1_555 1_555 yes
   Ru      Ti(2)   S(1)    Ti(1)   -22.62(4) 1_555 1_555 7_555 1_555 yes
   Ru      Ti(2)   C(4)    C(5)    -44.6(6) 1_555 1_555 1_555 1_555 yes
   Ru      Ti(2)   C(4)    C(5)    -157.7(3) 1_555 1_555 1_555 7_555 yes
   Ru      Ti(2)   C(5)    C(4)    151.7(4) 1_555 1_555 1_555 1_555 yes
   Ru      Ti(2)   C(5)    C(6)    -92.4(4) 1_555 1_555 1_555 1_555 yes
   Ru      Ti(2)   C(5)    C(4)    82.6(8)  1_555 1_555 7_555 1_555 yes
   Ru      Ti(2)   C(5)    C(6)    -33.3(10) 1_555 1_555 7_555 7_555 yes
   Ru      Ti(2)   C(6)    C(5)    101.8(4) 1_555 1_555 1_555 1_555 yes
   Ru      Ti(2)   C(6)    C(6)    -142.05(9) 1_555 1_555 1_555 7_555 yes
   Ru      Ti(2)   C(6)    C(5)    169.6(3) 1_555 1_555 7_555 7_555 yes
   Ru      Ti(2)   C(6)    C(6)    53.4(1)  1_555 1_555 7_555 1_555 yes
   Ru      S(1)    Ti(1)   Ti(2)   78.45(3) 1_555 1_555 1_555 1_555 yes
   Ru      S(1)    Ti(1)   S(1)    106.49(4) 1_555 1_555 1_555 7_555 yes
   Ru      S(1)    Ti(1)   S(2)    1.40(4)  1_555 1_555 1_555 1_555 yes
   Ru      S(1)    Ti(1)   C(1)    -155.2(1) 1_555 1_555 1_555 1_555 yes
   Ru      S(1)    Ti(1)   C(2)    -122.5(1) 1_555 1_555 1_555 1_555 yes
   Ru      S(1)    Ti(1)   C(2)    -163.4(2) 1_555 1_555 1_555 7_555 yes
   Ru      S(1)    Ti(1)   C(3)    -98.1(1) 1_555 1_555 1_555 1_555 yes
   Ru      S(1)    Ti(1)   C(3)    -115.3(2) 1_555 1_555 1_555 7_555 yes
   Ru      S(1)    Ti(2)   Ti(1)   -79.05(4) 1_555 1_555 1_555 1_555 yes
   Ru      S(1)    Ti(2)   S(1)    -107.10(4) 1_555 1_555 1_555 7_555 yes
   Ru      S(1)    Ti(2)   S(3)    -1.72(4) 1_555 1_555 1_555 1_555 yes
   Ru      S(1)    Ti(2)   C(4)    155.0(1) 1_555 1_555 1_555 1_555 yes
   Ru      S(1)    Ti(2)   C(5)    121.7(2) 1_555 1_555 1_555 1_555 yes
   Ru      S(1)    Ti(2)   C(5)    162.6(2) 1_555 1_555 1_555 7_555 yes
   Ru      S(1)    Ti(2)   C(6)    98.4(1)  1_555 1_555 1_555 1_555 yes
   Ru      S(1)    Ti(2)   C(6)    115.2(3) 1_555 1_555 1_555 7_555 yes
   Ru      S(2)    Ru      Ti(1)   76.99(4) 1_555 1_555 7_555 1_555 yes
   Ru      S(2)    Ru      Ti(2)   24.80(4) 1_555 1_555 7_555 1_555 yes
   Ru      S(2)    Ru      S(1)    75.64(5) 1_555 1_555 7_555 7_555 yes
   Ru      S(2)    Ru      S(3)    -23.34(5) 1_555 1_555 7_555 1_555 yes
   Ru      S(2)    Ru      C(7)    175.0(1) 1_555 1_555 7_555 7_555 yes
   Ru      S(2)    Ru      C(8)    -161.5(2) 1_555 1_555 7_555 7_555 yes
   Ru      S(2)    Ru      C(9)    -123.5(2) 1_555 1_555 7_555 7_555 yes
   Ru      S(2)    Ru      C(10)   -105.7(2) 1_555 1_555 7_555 7_555 yes
   Ru      S(2)    Ru      C(11)   -155.9(4) 1_555 1_555 7_555 7_555 yes
   Ru      S(2)    Ti(1)   Ti(2)   -49.08(2) 1_555 1_555 1_555 1_555 yes
   Ru      S(2)    Ti(1)   S(1)    -1.37(4) 1_555 1_555 1_555 1_555 yes
   Ru      S(2)    Ti(1)   S(1)    -96.79(4) 1_555 1_555 1_555 7_555 yes
   Ru      S(2)    Ti(1)   C(1)    130.92(2) 1_555 1_555 1_555 1_555 yes
   Ru      S(2)    Ti(1)   C(2)    96.8(2)  1_555 1_555 1_555 1_555 yes
   Ru      S(2)    Ti(1)   C(2)    165.0(2) 1_555 1_555 1_555 7_555 yes
   Ru      S(2)    Ti(1)   C(3)    113.9(1) 1_555 1_555 1_555 1_555 yes
   Ru      S(2)    Ti(1)   C(3)    147.9(1) 1_555 1_555 1_555 7_555 yes
   Ru      S(3)    Ru      Ti(1)   -24.17(4) 1_555 1_555 7_555 1_555 yes
   Ru      S(3)    Ru      Ti(2)   -76.38(4) 1_555 1_555 7_555 1_555 yes
   Ru      S(3)    Ru      S(1)    -74.72(5) 1_555 1_555 7_555 7_555 yes
   Ru      S(3)    Ru      S(2)    23.48(5) 1_555 1_555 7_555 1_555 yes
   Ru      S(3)    Ru      C(7)    168.5(3) 1_555 1_555 7_555 7_555 yes
   Ru      S(3)    Ru      C(8)    106.2(2) 1_555 1_555 7_555 7_555 yes
   Ru      S(3)    Ru      C(9)    119.2(2) 1_555 1_555 7_555 7_555 yes
   Ru      S(3)    Ru      C(10)   155.7(2) 1_555 1_555 7_555 7_555 yes
   Ru      S(3)    Ru      C(11)   -176.7(1) 1_555 1_555 7_555 7_555 yes
   Ru      S(3)    Ti(2)   Ti(1)   49.48(2) 1_555 1_555 1_555 1_555 yes
   Ru      S(3)    Ti(2)   S(1)    1.69(4)  1_555 1_555 1_555 1_555 yes
   Ru      S(3)    Ti(2)   S(1)    97.27(4) 1_555 1_555 1_555 7_555 yes
   Ru      S(3)    Ti(2)   C(4)    -130.52(2) 1_555 1_555 1_555 1_555 yes
   Ru      S(3)    Ti(2)   C(5)    -96.7(2) 1_555 1_555 1_555 1_555 yes
   Ru      S(3)    Ti(2)   C(5)    -164.3(2) 1_555 1_555 1_555 7_555 yes
   Ru      S(3)    Ti(2)   C(6)    -114.1(1) 1_555 1_555 1_555 1_555 yes
   Ru      S(3)    Ti(2)   C(6)    -146.9(1) 1_555 1_555 1_555 7_555 yes
   Ru      C(7)    C(8)    C(9)    -61.8(3) 1_555 1_555 1_555 1_555 yes
   Ru      C(7)    C(8)    C(13)   119.9(5) 1_555 1_555 1_555 1_555 yes
   Ru      C(7)    C(11)   C(10)   62.6(3)  1_555 1_555 1_555 1_555 yes
   Ru      C(7)    C(11)   C(16)   -121.2(5) 1_555 1_555 1_555 1_555 yes
   Ru      C(8)    C(7)    C(11)   61.6(3)  1_555 1_555 1_555 1_555 yes
   Ru      C(8)    C(7)    C(12)   -120.3(5) 1_555 1_555 1_555 1_555 yes
   Ru      C(8)    C(9)    C(10)   -63.5(3) 1_555 1_555 1_555 1_555 yes
   Ru      C(8)    C(9)    C(14)   119.2(5) 1_555 1_555 1_555 1_555 yes
   Ru      C(9)    C(8)    C(7)    63.1(3)  1_555 1_555 1_555 1_555 yes
   Ru      C(9)    C(8)    C(13)   -118.6(5) 1_555 1_555 1_555 1_555 yes
   Ru      C(9)    C(10)   C(11)   -62.4(3) 1_555 1_555 1_555 1_555 yes
   Ru      C(9)    C(10)   C(15)   120.2(5) 1_555 1_555 1_555 1_555 yes
   Ru      C(10)   C(9)    C(8)    63.4(3)  1_555 1_555 1_555 1_555 yes
   Ru      C(10)   C(9)    C(14)   -119.3(5) 1_555 1_555 1_555 1_555 yes
   Ru      C(10)   C(11)   C(7)    -62.5(3) 1_555 1_555 1_555 1_555 yes
   Ru      C(10)   C(11)   C(16)   121.2(5) 1_555 1_555 1_555 1_555 yes
   Ru      C(11)   C(7)    C(8)    -61.7(3) 1_555 1_555 1_555 1_555 yes
   Ru      C(11)   C(7)    C(12)   120.2(5) 1_555 1_555 1_555 1_555 yes
   Ru      C(11)   C(10)   C(9)    61.3(3)  1_555 1_555 1_555 1_555 yes
   Ru      C(11)   C(10)   C(15)   -121.3(5) 1_555 1_555 1_555 1_555 yes
   Ti(1)   Ru      Ti(2)   S(1)    -60.56(4) 1_555 1_555 1_555 1_555 yes
   Ti(1)   Ru      Ti(2)   S(1)    19.95(4) 1_555 1_555 1_555 7_555 yes
   Ti(1)   Ru      Ti(2)   S(3)    117.35(4) 1_555 1_555 1_555 1_555 yes
   Ti(1)   Ru      Ti(2)   C(4)    -103.3(3) 1_555 1_555 1_555 1_555 yes
   Ti(1)   Ru      Ti(2)   C(5)    -128.9(2) 1_555 1_555 1_555 1_555 yes
   Ti(1)   Ru      Ti(2)   C(5)    -167.8(7) 1_555 1_555 1_555 7_555 yes
   Ti(1)   Ru      Ti(2)   C(6)    -165.3(2) 1_555 1_555 1_555 1_555 yes
   Ti(1)   Ru      Ti(2)   C(6)    167.0(2) 1_555 1_555 1_555 7_555 yes
   Ti(1)   Ru      S(1)    Ti(2)   83.76(4) 1_555 1_555 1_555 1_555 yes
   Ti(1)   Ru      S(3)    Ti(2)   -52.21(4) 1_555 1_555 1_555 1_555 yes
   Ti(1)   Ru      C(7)    C(8)    -97.8(3) 1_555 1_555 1_555 1_555 yes
   Ti(1)   Ru      C(7)    C(11)   143.6(3) 1_555 1_555 1_555 1_555 yes
   Ti(1)   Ru      C(7)    C(12)   22.0(6)  1_555 1_555 1_555 1_555 yes
   Ti(1)   Ru      C(8)    C(7)    100.7(3) 1_555 1_555 1_555 1_555 yes
   Ti(1)   Ru      C(8)    C(9)    -143.5(3) 1_555 1_555 1_555 1_555 yes
   Ti(1)   Ru      C(8)    C(13)   -23.1(8) 1_555 1_555 1_555 1_555 yes
   Ti(1)   Ru      C(9)    C(8)    60.2(4)  1_555 1_555 1_555 1_555 yes
   Ti(1)   Ru      C(9)    C(10)   176.9(2) 1_555 1_555 1_555 1_555 yes
   Ti(1)   Ru      C(9)    C(14)   -61.5(7) 1_555 1_555 1_555 1_555 yes
   Ti(1)   Ru      C(10)   C(9)    -70(4)   1_555 1_555 1_555 1_555 yes
   Ti(1)   Ru      C(10)   C(11)   46(4)    1_555 1_555 1_555 1_555 yes
   Ti(1)   Ru      C(10)   C(15)   168(4)   1_555 1_555 1_555 1_555 yes
   Ti(1)   Ru      C(11)   C(7)    -60.1(4) 1_555 1_555 1_555 1_555 yes
   Ti(1)   Ru      C(11)   C(10)   -177.6(2) 1_555 1_555 1_555 1_555 yes
   Ti(1)   Ru      C(11)   C(16)   62.3(6)  1_555 1_555 1_555 1_555 yes
   Ti(1)   Ru      Ti(2)   S(1)    -19.95(4) 1_555 7_555 1_555 1_555 yes
   Ti(1)   Ru      Ti(2)   S(1)    60.56(4) 1_555 7_555 1_555 7_555 yes
   Ti(1)   Ru      Ti(2)   S(3)    -117.35(4) 1_555 7_555 1_555 1_555 yes
   Ti(1)   Ru      Ti(2)   C(4)    103.3(3) 1_555 7_555 1_555 1_555 yes
   Ti(1)   Ru      Ti(2)   C(5)    167.8(7) 1_555 7_555 1_555 1_555 yes
   Ti(1)   Ru      Ti(2)   C(5)    128.9(2) 1_555 7_555 1_555 7_555 yes
   Ti(1)   Ru      Ti(2)   C(6)    -167.0(2) 1_555 7_555 1_555 1_555 yes
   Ti(1)   Ru      Ti(2)   C(6)    165.3(2) 1_555 7_555 1_555 7_555 yes
   Ti(1)   Ru      S(1)    Ti(2)   -83.76(4) 1_555 7_555 7_555 1_555 yes
   Ti(1)   Ru      S(3)    Ti(2)   52.21(4) 1_555 7_555 1_555 1_555 yes
   Ti(1)   Ru      C(9)    C(8)    -60.2(4) 1_555 7_555 7_555 7_555 yes
   Ti(1)   Ru      C(9)    C(10)   -176.9(2) 1_555 7_555 7_555 7_555 yes
   Ti(1)   Ru      C(9)    C(14)   61.5(7)  1_555 7_555 7_555 7_555 yes
   Ti(1)   Ru      C(10)   C(9)    70(4)    1_555 7_555 7_555 7_555 yes
   Ti(1)   Ru      C(10)   C(11)   -46(4)   1_555 7_555 7_555 7_555 yes
   Ti(1)   Ru      C(10)   C(15)   -168(4)  1_555 7_555 7_555 7_555 yes
   Ti(1)   Ti(2)   Ru      S(1)    60.56(4) 1_555 1_555 1_555 1_555 yes
   Ti(1)   Ti(2)   Ru      S(2)    -41.84(4) 1_555 1_555 1_555 1_555 yes
   Ti(1)   Ti(2)   Ru      S(3)    -117.35(4) 1_555 1_555 1_555 1_555 yes
   Ti(1)   Ti(2)   Ru      C(7)    100.4(2) 1_555 1_555 1_555 1_555 yes
   Ti(1)   Ti(2)   Ru      C(8)    76(1)    1_555 1_555 1_555 1_555 yes
   Ti(1)   Ti(2)   Ru      C(9)    -146.6(3) 1_555 1_555 1_555 1_555 yes
   Ti(1)   Ti(2)   Ru      C(10)   178.5(2) 1_555 1_555 1_555 1_555 yes
   Ti(1)   Ti(2)   Ru      C(11)   137.8(2) 1_555 1_555 1_555 1_555 yes
   Ti(1)   Ti(2)   Ru      S(1)    -60.56(4) 1_555 1_555 7_555 7_555 yes
   Ti(1)   Ti(2)   Ru      S(2)    41.84(4) 1_555 1_555 7_555 1_555 yes
   Ti(1)   Ti(2)   Ru      S(3)    117.35(4) 1_555 1_555 7_555 1_555 yes
   Ti(1)   Ti(2)   Ru      C(7)    -100.4(2) 1_555 1_555 7_555 7_555 yes
   Ti(1)   Ti(2)   Ru      C(8)    -76(1)   1_555 1_555 7_555 7_555 yes
   Ti(1)   Ti(2)   Ru      C(9)    146.6(3) 1_555 1_555 7_555 7_555 yes
   Ti(1)   Ti(2)   Ru      C(10)   -178.5(2) 1_555 1_555 7_555 7_555 yes
   Ti(1)   Ti(2)   Ru      C(11)   -137.8(2) 1_555 1_555 7_555 7_555 yes
   Ti(1)   Ti(2)   C(4)    C(5)    -123.5(4) 1_555 1_555 1_555 1_555 yes
   Ti(1)   Ti(2)   C(4)    C(5)    123.5(4) 1_555 1_555 1_555 7_555 yes
   Ti(1)   Ti(2)   C(5)    C(4)    82.8(5)  1_555 1_555 1_555 1_555 yes
   Ti(1)   Ti(2)   C(5)    C(6)    -161.4(3) 1_555 1_555 1_555 1_555 yes
   Ti(1)   Ti(2)   C(5)    C(4)    -82.8(5) 1_555 1_555 7_555 1_555 yes
   Ti(1)   Ti(2)   C(5)    C(6)    161.4(3) 1_555 1_555 7_555 7_555 yes
   Ti(1)   Ti(2)   C(6)    C(5)    52.5(6)  1_555 1_555 1_555 1_555 yes
   Ti(1)   Ti(2)   C(6)    C(6)    168.7(5) 1_555 1_555 1_555 7_555 yes
   Ti(1)   Ti(2)   C(6)    C(5)    -52.5(6) 1_555 1_555 7_555 7_555 yes
   Ti(1)   Ti(2)   C(6)    C(6)    -168.7(5) 1_555 1_555 7_555 1_555 yes
   Ti(1)   S(1)    Ru      Ti(2)   -83.76(4) 1_555 1_555 1_555 1_555 yes
   Ti(1)   S(1)    Ru      S(2)    -1.29(4) 1_555 1_555 1_555 1_555 yes
   Ti(1)   S(1)    Ru      S(3)    -82.15(4) 1_555 1_555 1_555 1_555 yes
   Ti(1)   S(1)    Ru      C(7)    122.3(2) 1_555 1_555 1_555 1_555 yes
   Ti(1)   S(1)    Ru      C(8)    98.6(2)  1_555 1_555 1_555 1_555 yes
   Ti(1)   S(1)    Ru      C(9)    130.5(4) 1_555 1_555 1_555 1_555 yes
   Ti(1)   S(1)    Ru      C(10)   177.5(2) 1_555 1_555 1_555 1_555 yes
   Ti(1)   S(1)    Ru      C(11)   159.5(1) 1_555 1_555 1_555 1_555 yes
   Ti(1)   S(1)    Ti(2)   S(1)    -28.05(5) 1_555 1_555 1_555 7_555 yes
   Ti(1)   S(1)    Ti(2)   S(3)    77.33(5) 1_555 1_555 1_555 1_555 yes
   Ti(1)   S(1)    Ti(2)   C(4)    -126.0(1) 1_555 1_555 1_555 1_555 yes
   Ti(1)   S(1)    Ti(2)   C(5)    -159.2(2) 1_555 1_555 1_555 1_555 yes
   Ti(1)   S(1)    Ti(2)   C(5)    -118.4(2) 1_555 1_555 1_555 7_555 yes
   Ti(1)   S(1)    Ti(2)   C(6)    177.4(1) 1_555 1_555 1_555 1_555 yes
   Ti(1)   S(1)    Ti(2)   C(6)    -165.8(3) 1_555 1_555 1_555 7_555 yes
   Ti(1)   S(1)    Ru      Ti(2)   83.76(4) 1_555 7_555 7_555 1_555 yes
   Ti(1)   S(1)    Ru      S(2)    1.29(4)  1_555 7_555 7_555 1_555 yes
   Ti(1)   S(1)    Ru      S(3)    82.15(4) 1_555 7_555 7_555 1_555 yes
   Ti(1)   S(1)    Ru      C(7)    -122.3(2) 1_555 7_555 7_555 7_555 yes
   Ti(1)   S(1)    Ru      C(8)    -98.6(2) 1_555 7_555 7_555 7_555 yes
   Ti(1)   S(1)    Ru      C(9)    -130.5(4) 1_555 7_555 7_555 7_555 yes
   Ti(1)   S(1)    Ru      C(10)   -177.5(2) 1_555 7_555 7_555 7_555 yes
   Ti(1)   S(1)    Ru      C(11)   -159.5(1) 1_555 7_555 7_555 7_555 yes
   Ti(1)   S(1)    Ti(2)   S(1)    28.05(5) 1_555 7_555 1_555 1_555 yes
   Ti(1)   S(1)    Ti(2)   S(3)    -77.33(5) 1_555 7_555 1_555 1_555 yes
   Ti(1)   S(1)    Ti(2)   C(4)    126.0(1) 1_555 7_555 1_555 1_555 yes
   Ti(1)   S(1)    Ti(2)   C(5)    118.4(2) 1_555 7_555 1_555 1_555 yes
   Ti(1)   S(1)    Ti(2)   C(5)    159.2(2) 1_555 7_555 1_555 7_555 yes
   Ti(1)   S(1)    Ti(2)   C(6)    165.8(3) 1_555 7_555 1_555 1_555 yes
   Ti(1)   S(1)    Ti(2)   C(6)    -177.4(1) 1_555 7_555 1_555 7_555 yes
   Ti(1)   S(2)    Ru      Ti(2)   52.19(4) 1_555 1_555 1_555 1_555 yes
   Ti(1)   S(2)    Ru      S(1)    1.34(4)  1_555 1_555 1_555 1_555 yes
   Ti(1)   S(2)    Ru      S(3)    100.32(4) 1_555 1_555 1_555 1_555 yes
   Ti(1)   S(2)    Ru      C(7)    -98.0(1) 1_555 1_555 1_555 1_555 yes
   Ti(1)   S(2)    Ru      C(8)    -121.5(2) 1_555 1_555 1_555 1_555 yes
   Ti(1)   S(2)    Ru      C(9)    -159.5(2) 1_555 1_555 1_555 1_555 yes
   Ti(1)   S(2)    Ru      C(10)   -177.4(2) 1_555 1_555 1_555 1_555 yes
   Ti(1)   S(2)    Ru      C(11)   -127.1(4) 1_555 1_555 1_555 1_555 yes
   Ti(1)   S(2)    Ru      Ti(2)   -52.19(4) 1_555 1_555 7_555 1_555 yes
   Ti(1)   S(2)    Ru      S(1)    -1.34(4) 1_555 1_555 7_555 7_555 yes
   Ti(1)   S(2)    Ru      S(3)    -100.32(4) 1_555 1_555 7_555 1_555 yes
   Ti(1)   S(2)    Ru      C(7)    98.0(1)  1_555 1_555 7_555 7_555 yes
   Ti(1)   S(2)    Ru      C(8)    121.5(2) 1_555 1_555 7_555 7_555 yes
   Ti(1)   S(2)    Ru      C(9)    159.5(2) 1_555 1_555 7_555 7_555 yes
   Ti(1)   S(2)    Ru      C(10)   177.4(2) 1_555 1_555 7_555 7_555 yes
   Ti(1)   S(2)    Ru      C(11)   127.1(4) 1_555 1_555 7_555 7_555 yes
   Ti(1)   C(1)    C(2)    C(3)    64.3(3)  1_555 1_555 1_555 1_555 yes
   Ti(1)   C(1)    C(2)    C(3)    -64.3(3) 1_555 1_555 7_555 7_555 yes
   Ti(1)   C(2)    C(1)    C(2)    -65.1(5) 1_555 1_555 1_555 7_555 yes
   Ti(1)   C(2)    C(3)    C(3)    65.4(1)  1_555 1_555 1_555 7_555 yes
   Ti(1)   C(2)    C(1)    C(2)    65.1(5)  1_555 7_555 1_555 1_555 yes
   Ti(1)   C(2)    C(3)    C(3)    -65.4(1) 1_555 7_555 7_555 1_555 yes
   Ti(1)   C(3)    C(2)    C(1)    -65.0(4) 1_555 1_555 1_555 1_555 yes
   Ti(1)   C(3)    C(3)    C(2)    65.7(3)  1_555 1_555 7_555 7_555 yes
   Ti(1)   C(3)    C(2)    C(1)    65.0(4)  1_555 7_555 7_555 1_555 yes
   Ti(1)   C(3)    C(3)    C(2)    -65.7(3) 1_555 7_555 1_555 1_555 yes
   Ti(2)   Ru      Ti(1)   S(1)    60.93(4) 1_555 1_555 1_555 1_555 yes
   Ti(2)   Ru      Ti(1)   S(1)    -19.90(4) 1_555 1_555 1_555 7_555 yes
   Ti(2)   Ru      Ti(1)   S(2)    -117.38(4) 1_555 1_555 1_555 1_555 yes
   Ti(2)   Ru      Ti(1)   C(1)    103.5(3) 1_555 1_555 1_555 1_555 yes
   Ti(2)   Ru      Ti(1)   C(2)    128.5(1) 1_555 1_555 1_555 1_555 yes
   Ti(2)   Ru      Ti(1)   C(2)    166.9(6) 1_555 1_555 1_555 7_555 yes
   Ti(2)   Ru      Ti(1)   C(3)    165.4(1) 1_555 1_555 1_555 1_555 yes
   Ti(2)   Ru      Ti(1)   C(3)    -165.7(2) 1_555 1_555 1_555 7_555 yes
   Ti(2)   Ru      C(7)    C(8)    -175.2(3) 1_555 1_555 1_555 1_555 yes
   Ti(2)   Ru      C(7)    C(11)   66.1(3)  1_555 1_555 1_555 1_555 yes
   Ti(2)   Ru      C(7)    C(12)   -55.4(7) 1_555 1_555 1_555 1_555 yes
   Ti(2)   Ru      C(8)    C(7)    27(1)    1_555 1_555 1_555 1_555 yes
   Ti(2)   Ru      C(8)    C(9)    143.1(10) 1_555 1_555 1_555 1_555 yes
   Ti(2)   Ru      C(8)    C(13)   -96(1)   1_555 1_555 1_555 1_555 yes
   Ti(2)   Ru      C(9)    C(8)    -172.0(2) 1_555 1_555 1_555 1_555 yes
   Ti(2)   Ru      C(9)    C(10)   -55.2(4) 1_555 1_555 1_555 1_555 yes
   Ti(2)   Ru      C(9)    C(14)   66.3(8)  1_555 1_555 1_555 1_555 yes
   Ti(2)   Ru      C(10)   C(9)    149.7(3) 1_555 1_555 1_555 1_555 yes
   Ti(2)   Ru      C(10)   C(11)   -92.9(3) 1_555 1_555 1_555 1_555 yes
   Ti(2)   Ru      C(10)   C(15)   29.0(6)  1_555 1_555 1_555 1_555 yes
   Ti(2)   Ru      C(11)   C(7)    -136.6(3) 1_555 1_555 1_555 1_555 yes
   Ti(2)   Ru      C(11)   C(10)   105.9(3) 1_555 1_555 1_555 1_555 yes
   Ti(2)   Ru      C(11)   C(16)   -14.2(6) 1_555 1_555 1_555 1_555 yes
   Ti(2)   Ru      Ti(1)   S(1)    19.90(4) 1_555 7_555 1_555 1_555 yes
   Ti(2)   Ru      Ti(1)   S(1)    -60.93(4) 1_555 7_555 1_555 7_555 yes
   Ti(2)   Ru      Ti(1)   S(2)    117.38(4) 1_555 7_555 1_555 1_555 yes
   Ti(2)   Ru      Ti(1)   C(1)    -103.5(3) 1_555 7_555 1_555 1_555 yes
   Ti(2)   Ru      Ti(1)   C(2)    -166.9(6) 1_555 7_555 1_555 1_555 yes
   Ti(2)   Ru      Ti(1)   C(2)    -128.5(1) 1_555 7_555 1_555 7_555 yes
   Ti(2)   Ru      Ti(1)   C(3)    165.7(2) 1_555 7_555 1_555 1_555 yes
   Ti(2)   Ru      Ti(1)   C(3)    -165.4(1) 1_555 7_555 1_555 7_555 yes
   Ti(2)   Ru      C(9)    C(8)    172.0(2) 1_555 7_555 7_555 7_555 yes
   Ti(2)   Ru      C(9)    C(10)   55.2(4)  1_555 7_555 7_555 7_555 yes
   Ti(2)   Ru      C(9)    C(14)   -66.3(8) 1_555 7_555 7_555 7_555 yes
   Ti(2)   Ru      C(10)   C(9)    -149.7(3) 1_555 7_555 7_555 7_555 yes
   Ti(2)   Ru      C(10)   C(11)   92.9(3)  1_555 7_555 7_555 7_555 yes
   Ti(2)   Ru      C(10)   C(15)   -29.0(6) 1_555 7_555 7_555 7_555 yes
   Ti(2)   Ti(1)   Ru      S(1)    -60.93(4) 1_555 1_555 1_555 1_555 yes
   Ti(2)   Ti(1)   Ru      S(2)    117.38(4) 1_555 1_555 1_555 1_555 yes
   Ti(2)   Ti(1)   Ru      S(3)    42.18(4) 1_555 1_555 1_555 1_555 yes
   Ti(2)   Ti(1)   Ru      C(7)    -131.3(2) 1_555 1_555 1_555 1_555 yes
   Ti(2)   Ti(1)   Ru      C(8)    -172.3(2) 1_555 1_555 1_555 1_555 yes
   Ti(2)   Ti(1)   Ru      C(9)    151.4(2) 1_555 1_555 1_555 1_555 yes
   Ti(2)   Ti(1)   Ru      C(10)   -140(4)  1_555 1_555 1_555 1_555 yes
   Ti(2)   Ti(1)   Ru      C(11)   -95.5(2) 1_555 1_555 1_555 1_555 yes
   Ti(2)   Ti(1)   Ru      S(1)    60.93(4) 1_555 1_555 7_555 7_555 yes
   Ti(2)   Ti(1)   Ru      S(2)    -117.38(4) 1_555 1_555 7_555 1_555 yes
   Ti(2)   Ti(1)   Ru      S(3)    -42.18(4) 1_555 1_555 7_555 1_555 yes
   Ti(2)   Ti(1)   Ru      C(7)    131.3(2) 1_555 1_555 7_555 7_555 yes
   Ti(2)   Ti(1)   Ru      C(8)    172.3(2) 1_555 1_555 7_555 7_555 yes
   Ti(2)   Ti(1)   Ru      C(9)    -151.4(2) 1_555 1_555 7_555 7_555 yes
   Ti(2)   Ti(1)   Ru      C(10)   140(4)   1_555 1_555 7_555 7_555 yes
   Ti(2)   Ti(1)   Ru      C(11)   95.5(2)  1_555 1_555 7_555 7_555 yes
   Ti(2)   Ti(1)   C(1)    C(2)    122.4(3) 1_555 1_555 1_555 1_555 yes
   Ti(2)   Ti(1)   C(1)    C(2)    -122.4(3) 1_555 1_555 1_555 7_555 yes
   Ti(2)   Ti(1)   C(2)    C(1)    -83.8(4) 1_555 1_555 1_555 1_555 yes
   Ti(2)   Ti(1)   C(2)    C(3)    160.0(2) 1_555 1_555 1_555 1_555 yes
   Ti(2)   Ti(1)   C(2)    C(1)    83.8(4)  1_555 1_555 7_555 1_555 yes
   Ti(2)   Ti(1)   C(2)    C(3)    -160.0(2) 1_555 1_555 7_555 7_555 yes
   Ti(2)   Ti(1)   C(3)    C(2)    -56.1(6) 1_555 1_555 1_555 1_555 yes
   Ti(2)   Ti(1)   C(3)    C(3)    -171.2(4) 1_555 1_555 1_555 7_555 yes
   Ti(2)   Ti(1)   C(3)    C(2)    56.1(6)  1_555 1_555 7_555 7_555 yes
   Ti(2)   Ti(1)   C(3)    C(3)    171.2(4) 1_555 1_555 7_555 1_555 yes
   Ti(2)   S(1)    Ru      S(2)    82.47(4) 1_555 1_555 1_555 1_555 yes
   Ti(2)   S(1)    Ru      S(3)    1.61(4)  1_555 1_555 1_555 1_555 yes
   Ti(2)   S(1)    Ru      C(7)    -153.9(2) 1_555 1_555 1_555 1_555 yes
   Ti(2)   S(1)    Ru      C(8)    -177.6(2) 1_555 1_555 1_555 1_555 yes
   Ti(2)   S(1)    Ru      C(9)    -145.7(4) 1_555 1_555 1_555 1_555 yes
   Ti(2)   S(1)    Ru      C(10)   -98.8(2) 1_555 1_555 1_555 1_555 yes
   Ti(2)   S(1)    Ru      C(11)   -116.8(1) 1_555 1_555 1_555 1_555 yes
   Ti(2)   S(1)    Ti(1)   S(1)    28.05(5) 1_555 1_555 1_555 7_555 yes
   Ti(2)   S(1)    Ti(1)   S(2)    -77.05(5) 1_555 1_555 1_555 1_555 yes
   Ti(2)   S(1)    Ti(1)   C(1)    126.4(1) 1_555 1_555 1_555 1_555 yes
   Ti(2)   S(1)    Ti(1)   C(2)    159.1(1) 1_555 1_555 1_555 1_555 yes
   Ti(2)   S(1)    Ti(1)   C(2)    118.2(2) 1_555 1_555 1_555 7_555 yes
   Ti(2)   S(1)    Ti(1)   C(3)    -176.6(1) 1_555 1_555 1_555 1_555 yes
   Ti(2)   S(1)    Ti(1)   C(3)    166.2(2) 1_555 1_555 1_555 7_555 yes
   Ti(2)   S(1)    Ru      S(2)    -82.47(4) 1_555 7_555 7_555 1_555 yes
   Ti(2)   S(1)    Ru      S(3)    -1.61(4) 1_555 7_555 7_555 1_555 yes
   Ti(2)   S(1)    Ru      C(7)    153.9(2) 1_555 7_555 7_555 7_555 yes
   Ti(2)   S(1)    Ru      C(8)    177.6(2) 1_555 7_555 7_555 7_555 yes
   Ti(2)   S(1)    Ru      C(9)    145.7(4) 1_555 7_555 7_555 7_555 yes
   Ti(2)   S(1)    Ru      C(10)   98.8(2)  1_555 7_555 7_555 7_555 yes
   Ti(2)   S(1)    Ru      C(11)   116.8(1) 1_555 7_555 7_555 7_555 yes
   Ti(2)   S(1)    Ti(1)   S(1)    -28.05(5) 1_555 7_555 1_555 1_555 yes
   Ti(2)   S(1)    Ti(1)   S(2)    77.05(5) 1_555 7_555 1_555 1_555 yes
   Ti(2)   S(1)    Ti(1)   C(1)    -126.4(1) 1_555 7_555 1_555 1_555 yes
   Ti(2)   S(1)    Ti(1)   C(2)    -118.2(2) 1_555 7_555 1_555 1_555 yes
   Ti(2)   S(1)    Ti(1)   C(2)    -159.1(1) 1_555 7_555 1_555 7_555 yes
   Ti(2)   S(1)    Ti(1)   C(3)    -166.2(2) 1_555 7_555 1_555 1_555 yes
   Ti(2)   S(1)    Ti(1)   C(3)    176.6(1) 1_555 7_555 1_555 7_555 yes
   Ti(2)   S(3)    Ru      S(1)    -1.66(4) 1_555 1_555 1_555 1_555 yes
   Ti(2)   S(3)    Ru      S(2)    -99.86(4) 1_555 1_555 1_555 1_555 yes
   Ti(2)   S(3)    Ru      C(7)    115.1(3) 1_555 1_555 1_555 1_555 yes
   Ti(2)   S(3)    Ru      C(8)    177.4(2) 1_555 1_555 1_555 1_555 yes
   Ti(2)   S(3)    Ru      C(9)    164.4(2) 1_555 1_555 1_555 1_555 yes
   Ti(2)   S(3)    Ru      C(10)   127.9(2) 1_555 1_555 1_555 1_555 yes
   Ti(2)   S(3)    Ru      C(11)   100.3(1) 1_555 1_555 1_555 1_555 yes
   Ti(2)   S(3)    Ru      S(1)    1.66(4)  1_555 1_555 7_555 7_555 yes
   Ti(2)   S(3)    Ru      S(2)    99.86(4) 1_555 1_555 7_555 1_555 yes
   Ti(2)   S(3)    Ru      C(7)    -115.1(3) 1_555 1_555 7_555 7_555 yes
   Ti(2)   S(3)    Ru      C(8)    -177.4(2) 1_555 1_555 7_555 7_555 yes
   Ti(2)   S(3)    Ru      C(9)    -164.4(2) 1_555 1_555 7_555 7_555 yes
   Ti(2)   S(3)    Ru      C(10)   -127.9(2) 1_555 1_555 7_555 7_555 yes
   Ti(2)   S(3)    Ru      C(11)   -100.3(1) 1_555 1_555 7_555 7_555 yes
   Ti(2)   C(4)    C(5)    C(6)    -64.8(4) 1_555 1_555 1_555 1_555 yes
   Ti(2)   C(4)    C(5)    C(6)    64.8(4)  1_555 1_555 7_555 7_555 yes
   Ti(2)   C(5)    C(4)    C(5)    66.6(6)  1_555 1_555 1_555 7_555 yes
   Ti(2)   C(5)    C(6)    C(6)    -65.6(1) 1_555 1_555 1_555 7_555 yes
   Ti(2)   C(5)    C(4)    C(5)    -66.6(6) 1_555 7_555 1_555 1_555 yes
   Ti(2)   C(5)    C(6)    C(6)    65.6(1)  1_555 7_555 7_555 1_555 yes
   Ti(2)   C(6)    C(5)    C(4)    64.4(5)  1_555 1_555 1_555 1_555 yes
   Ti(2)   C(6)    C(6)    C(5)    -65.4(3) 1_555 1_555 7_555 7_555 yes
   Ti(2)   C(6)    C(5)    C(4)    -64.4(5) 1_555 7_555 7_555 1_555 yes
   Ti(2)   C(6)    C(6)    C(5)    65.4(3)  1_555 7_555 1_555 1_555 yes
   S(1)    Ru      Ti(1)   S(2)    -178.30(5) 1_555 1_555 1_555 1_555 yes
   S(1)    Ru      Ti(1)   C(1)    42.6(3)  1_555 1_555 1_555 1_555 yes
   S(1)    Ru      Ti(1)   C(2)    67.5(1)  1_555 1_555 1_555 1_555 yes
   S(1)    Ru      Ti(1)   C(2)    105.9(6) 1_555 1_555 1_555 7_555 yes
   S(1)    Ru      Ti(1)   C(3)    104.4(1) 1_555 1_555 1_555 1_555 yes
   S(1)    Ru      Ti(1)   C(3)    133.4(2) 1_555 1_555 1_555 7_555 yes
   S(1)    Ru      Ti(2)   S(3)    177.91(5) 1_555 1_555 1_555 1_555 yes
   S(1)    Ru      Ti(2)   C(4)    -42.8(3) 1_555 1_555 1_555 1_555 yes
   S(1)    Ru      Ti(2)   C(5)    -68.3(2) 1_555 1_555 1_555 1_555 yes
   S(1)    Ru      Ti(2)   C(5)    -107.3(7) 1_555 1_555 1_555 7_555 yes
   S(1)    Ru      Ti(2)   C(6)    -104.7(2) 1_555 1_555 1_555 1_555 yes
   S(1)    Ru      Ti(2)   C(6)    -132.4(2) 1_555 1_555 1_555 7_555 yes
   S(1)    Ru      C(7)    C(8)    -145.1(3) 1_555 1_555 1_555 1_555 yes
   S(1)    Ru      C(7)    C(11)   96.3(3)  1_555 1_555 1_555 1_555 yes
   S(1)    Ru      C(7)    C(12)   -25.2(6) 1_555 1_555 1_555 1_555 yes
   S(1)    Ru      C(8)    C(7)    42.2(4)  1_555 1_555 1_555 1_555 yes
   S(1)    Ru      C(8)    C(9)    158.0(3) 1_555 1_555 1_555 1_555 yes
   S(1)    Ru      C(8)    C(13)   -81.6(7) 1_555 1_555 1_555 1_555 yes
   S(1)    Ru      C(9)    C(8)    -46.9(7) 1_555 1_555 1_555 1_555 yes
   S(1)    Ru      C(9)    C(10)   69.8(6)  1_555 1_555 1_555 1_555 yes
   S(1)    Ru      C(9)    C(14)   -168.6(5) 1_555 1_555 1_555 1_555 yes
   S(1)    Ru      C(10)   C(9)    -148.5(3) 1_555 1_555 1_555 1_555 yes
   S(1)    Ru      C(10)   C(11)   -31.1(4) 1_555 1_555 1_555 1_555 yes
   S(1)    Ru      C(10)   C(15)   90.8(6)  1_555 1_555 1_555 1_555 yes
   S(1)    Ru      C(11)   C(7)    -86.5(3) 1_555 1_555 1_555 1_555 yes
   S(1)    Ru      C(11)   C(10)   156.0(3) 1_555 1_555 1_555 1_555 yes
   S(1)    Ru      C(11)   C(16)   35.9(6)  1_555 1_555 1_555 1_555 yes
   S(1)    Ti(1)   Ru      S(2)    178.30(5) 1_555 1_555 1_555 1_555 yes
   S(1)    Ti(1)   Ru      S(3)    103.10(5) 1_555 1_555 1_555 1_555 yes
   S(1)    Ti(1)   Ru      C(7)    -70.4(2) 1_555 1_555 1_555 1_555 yes
   S(1)    Ti(1)   Ru      C(8)    -111.4(2) 1_555 1_555 1_555 1_555 yes
   S(1)    Ti(1)   Ru      C(9)    -147.6(2) 1_555 1_555 1_555 1_555 yes
   S(1)    Ti(1)   Ru      C(10)   -79(4)   1_555 1_555 1_555 1_555 yes
   S(1)    Ti(1)   Ru      C(11)   -34.6(2) 1_555 1_555 1_555 1_555 yes
   S(1)    Ti(1)   Ru      S(2)    -97.48(5) 1_555 1_555 7_555 1_555 yes
   S(1)    Ti(1)   Ru      S(3)    -22.28(5) 1_555 1_555 7_555 1_555 yes
   S(1)    Ti(1)   Ru      C(7)    151.2(2) 1_555 1_555 7_555 7_555 yes
   S(1)    Ti(1)   Ru      C(8)    -167.8(2) 1_555 1_555 7_555 7_555 yes
   S(1)    Ti(1)   Ru      C(9)    -131.5(2) 1_555 1_555 7_555 7_555 yes
   S(1)    Ti(1)   Ru      C(10)   160(4)   1_555 1_555 7_555 7_555 yes
   S(1)    Ti(1)   Ru      C(11)   115.4(2) 1_555 1_555 7_555 7_555 yes
   S(1)    Ti(1)   Ti(2)   S(3)    -109.13(4) 1_555 1_555 1_555 1_555 yes
   S(1)    Ti(1)   Ti(2)   C(4)    70.87(4) 1_555 1_555 1_555 1_555 yes
   S(1)    Ti(1)   Ti(2)   C(5)    29.8(2)  1_555 1_555 1_555 1_555 yes
   S(1)    Ti(1)   Ti(2)   C(5)    111.9(2) 1_555 1_555 1_555 7_555 yes
   S(1)    Ti(1)   Ti(2)   C(6)    -8.3(5)  1_555 1_555 1_555 1_555 yes
   S(1)    Ti(1)   Ti(2)   C(6)    150.0(5) 1_555 1_555 1_555 7_555 yes
   S(1)    Ti(1)   C(1)    C(2)    76.0(3)  1_555 1_555 1_555 1_555 yes
   S(1)    Ti(1)   C(1)    C(2)    -168.8(3) 1_555 1_555 1_555 7_555 yes
   S(1)    Ti(1)   C(2)    C(1)    -106.1(3) 1_555 1_555 1_555 1_555 yes
   S(1)    Ti(1)   C(2)    C(3)    137.8(3) 1_555 1_555 1_555 1_555 yes
   S(1)    Ti(1)   C(2)    C(1)    14.8(4)  1_555 1_555 7_555 1_555 yes
   S(1)    Ti(1)   C(2)    C(3)    130.9(3) 1_555 1_555 7_555 7_555 yes
   S(1)    Ti(1)   C(3)    C(2)    -47.2(3) 1_555 1_555 1_555 1_555 yes
   S(1)    Ti(1)   C(3)    C(3)    -162.34(9) 1_555 1_555 1_555 7_555 yes
   S(1)    Ti(1)   C(3)    C(2)    -86.1(4) 1_555 1_555 7_555 7_555 yes
   S(1)    Ti(1)   C(3)    C(3)    29.1(2)  1_555 1_555 7_555 1_555 yes
   S(1)    Ti(2)   Ru      S(2)    -102.40(5) 1_555 1_555 1_555 1_555 yes
   S(1)    Ti(2)   Ru      S(3)    -177.91(5) 1_555 1_555 1_555 1_555 yes
   S(1)    Ti(2)   Ru      C(7)    39.9(2)  1_555 1_555 1_555 1_555 yes
   S(1)    Ti(2)   Ru      C(8)    16(1)    1_555 1_555 1_555 1_555 yes
   S(1)    Ti(2)   Ru      C(9)    152.8(3) 1_555 1_555 1_555 1_555 yes
   S(1)    Ti(2)   Ru      C(10)   118.0(2) 1_555 1_555 1_555 1_555 yes
   S(1)    Ti(2)   Ru      C(11)   77.3(2)  1_555 1_555 1_555 1_555 yes
   S(1)    Ti(2)   Ru      S(2)    21.89(5) 1_555 1_555 7_555 1_555 yes
   S(1)    Ti(2)   Ru      S(3)    97.40(5) 1_555 1_555 7_555 1_555 yes
   S(1)    Ti(2)   Ru      C(7)    -120.4(2) 1_555 1_555 7_555 7_555 yes
   S(1)    Ti(2)   Ru      C(8)    -96(1)   1_555 1_555 7_555 7_555 yes
   S(1)    Ti(2)   Ru      C(9)    126.7(3) 1_555 1_555 7_555 7_555 yes
   S(1)    Ti(2)   Ru      C(10)   161.5(2) 1_555 1_555 7_555 7_555 yes
   S(1)    Ti(2)   Ru      C(11)   -157.8(2) 1_555 1_555 7_555 7_555 yes
   S(1)    Ti(2)   Ti(1)   S(2)    109.13(4) 1_555 1_555 1_555 1_555 yes
   S(1)    Ti(2)   Ti(1)   C(1)    -70.87(4) 1_555 1_555 1_555 1_555 yes
   S(1)    Ti(2)   Ti(1)   C(2)    -29.9(2) 1_555 1_555 1_555 1_555 yes
   S(1)    Ti(2)   Ti(1)   C(2)    -111.9(2) 1_555 1_555 1_555 7_555 yes
   S(1)    Ti(2)   Ti(1)   C(3)    10.7(4)  1_555 1_555 1_555 1_555 yes
   S(1)    Ti(2)   Ti(1)   C(3)    -152.5(4) 1_555 1_555 1_555 7_555 yes
   S(1)    Ti(2)   C(4)    C(5)    -77.1(4) 1_555 1_555 1_555 1_555 yes
   S(1)    Ti(2)   C(4)    C(5)    169.8(4) 1_555 1_555 1_555 7_555 yes
   S(1)    Ti(2)   C(5)    C(4)    104.9(4) 1_555 1_555 1_555 1_555 yes
   S(1)    Ti(2)   C(5)    C(6)    -139.2(4) 1_555 1_555 1_555 1_555 yes
   S(1)    Ti(2)   C(5)    C(4)    -13.5(5) 1_555 1_555 7_555 1_555 yes
   S(1)    Ti(2)   C(5)    C(6)    -129.3(3) 1_555 1_555 7_555 7_555 yes
   S(1)    Ti(2)   C(6)    C(5)    45.7(4)  1_555 1_555 1_555 1_555 yes
   S(1)    Ti(2)   C(6)    C(6)    161.8(1) 1_555 1_555 1_555 7_555 yes
   S(1)    Ti(2)   C(6)    C(5)    86.9(5)  1_555 1_555 7_555 7_555 yes
   S(1)    Ti(2)   C(6)    C(6)    -29.3(2) 1_555 1_555 7_555 1_555 yes
   S(2)    Ru      Ti(1)   C(1)    -139.1(3) 1_555 1_555 1_555 1_555 yes
   S(2)    Ru      Ti(1)   C(2)    -114.2(1) 1_555 1_555 1_555 1_555 yes
   S(2)    Ru      Ti(1)   C(2)    -75.8(6) 1_555 1_555 1_555 7_555 yes
   S(2)    Ru      Ti(1)   C(3)    -77.3(1) 1_555 1_555 1_555 1_555 yes
   S(2)    Ru      Ti(1)   C(3)    -48.3(2) 1_555 1_555 1_555 7_555 yes
   S(2)    Ru      Ti(2)   S(3)    75.51(5) 1_555 1_555 1_555 1_555 yes
   S(2)    Ru      Ti(2)   C(4)    -145.2(3) 1_555 1_555 1_555 1_555 yes
   S(2)    Ru      Ti(2)   C(5)    -170.7(2) 1_555 1_555 1_555 1_555 yes
   S(2)    Ru      Ti(2)   C(5)    150.3(7) 1_555 1_555 1_555 7_555 yes
   S(2)    Ru      Ti(2)   C(6)    152.9(2) 1_555 1_555 1_555 1_555 yes
   S(2)    Ru      Ti(2)   C(6)    125.2(2) 1_555 1_555 1_555 7_555 yes
   S(2)    Ru      C(7)    C(8)    -41.7(4) 1_555 1_555 1_555 1_555 yes
   S(2)    Ru      C(7)    C(11)   -160.4(3) 1_555 1_555 1_555 1_555 yes
   S(2)    Ru      C(7)    C(12)   78.1(6)  1_555 1_555 1_555 1_555 yes
   S(2)    Ru      C(8)    C(7)    145.8(3) 1_555 1_555 1_555 1_555 yes
   S(2)    Ru      C(8)    C(9)    -98.4(3) 1_555 1_555 1_555 1_555 yes
   S(2)    Ru      C(8)    C(13)   22.0(7)  1_555 1_555 1_555 1_555 yes
   S(2)    Ru      C(9)    C(8)    85.3(3)  1_555 1_555 1_555 1_555 yes
   S(2)    Ru      C(9)    C(10)   -157.9(3) 1_555 1_555 1_555 1_555 yes
   S(2)    Ru      C(9)    C(14)   -36.4(7) 1_555 1_555 1_555 1_555 yes
   S(2)    Ru      C(10)   C(9)    29.9(4)  1_555 1_555 1_555 1_555 yes
   S(2)    Ru      C(10)   C(11)   147.3(3) 1_555 1_555 1_555 1_555 yes
   S(2)    Ru      C(10)   C(15)   -90.9(6) 1_555 1_555 1_555 1_555 yes
   S(2)    Ru      C(11)   C(7)    42.7(5)  1_555 1_555 1_555 1_555 yes
   S(2)    Ru      C(11)   C(10)   -74.8(5) 1_555 1_555 1_555 1_555 yes
   S(2)    Ru      C(11)   C(16)   165.0(4) 1_555 1_555 1_555 1_555 yes
   S(2)    Ru      Ti(1)   C(1)    139.1(3) 1_555 7_555 1_555 1_555 yes
   S(2)    Ru      Ti(1)   C(2)    75.8(6)  1_555 7_555 1_555 1_555 yes
   S(2)    Ru      Ti(1)   C(2)    114.2(1) 1_555 7_555 1_555 7_555 yes
   S(2)    Ru      Ti(1)   C(3)    48.3(2)  1_555 7_555 1_555 1_555 yes
   S(2)    Ru      Ti(1)   C(3)    77.3(1)  1_555 7_555 1_555 7_555 yes
   S(2)    Ru      Ti(2)   S(3)    -75.51(5) 1_555 7_555 1_555 1_555 yes
   S(2)    Ru      Ti(2)   C(4)    145.2(3) 1_555 7_555 1_555 1_555 yes
   S(2)    Ru      Ti(2)   C(5)    -150.3(7) 1_555 7_555 1_555 1_555 yes
   S(2)    Ru      Ti(2)   C(5)    170.7(2) 1_555 7_555 1_555 7_555 yes
   S(2)    Ru      Ti(2)   C(6)    -125.2(2) 1_555 7_555 1_555 1_555 yes
   S(2)    Ru      Ti(2)   C(6)    -152.9(2) 1_555 7_555 1_555 7_555 yes
   S(2)    Ru      C(9)    C(8)    -85.3(3) 1_555 7_555 7_555 7_555 yes
   S(2)    Ru      C(9)    C(10)   157.9(3) 1_555 7_555 7_555 7_555 yes
   S(2)    Ru      C(9)    C(14)   36.4(7)  1_555 7_555 7_555 7_555 yes
   S(2)    Ru      C(10)   C(9)    -29.9(4) 1_555 7_555 7_555 7_555 yes
   S(2)    Ru      C(10)   C(11)   -147.3(3) 1_555 7_555 7_555 7_555 yes
   S(2)    Ru      C(10)   C(15)   90.9(6)  1_555 7_555 7_555 7_555 yes
   S(2)    Ti(1)   Ru      S(3)    -75.20(5) 1_555 1_555 1_555 1_555 yes
   S(2)    Ti(1)   Ru      C(7)    111.3(2) 1_555 1_555 1_555 1_555 yes
   S(2)    Ti(1)   Ru      C(8)    70.3(2)  1_555 1_555 1_555 1_555 yes
   S(2)    Ti(1)   Ru      C(9)    34.1(2)  1_555 1_555 1_555 1_555 yes
   S(2)    Ti(1)   Ru      C(10)   102(4)   1_555 1_555 1_555 1_555 yes
   S(2)    Ti(1)   Ru      C(11)   147.1(2) 1_555 1_555 1_555 1_555 yes
   S(2)    Ti(1)   Ru      S(3)    75.20(5) 1_555 1_555 7_555 1_555 yes
   S(2)    Ti(1)   Ru      C(7)    -111.3(2) 1_555 1_555 7_555 7_555 yes
   S(2)    Ti(1)   Ru      C(8)    -70.3(2) 1_555 1_555 7_555 7_555 yes
   S(2)    Ti(1)   Ru      C(9)    -34.1(2) 1_555 1_555 7_555 7_555 yes
   S(2)    Ti(1)   Ru      C(10)   -102(4)  1_555 1_555 7_555 7_555 yes
   S(2)    Ti(1)   Ru      C(11)   -147.1(2) 1_555 1_555 7_555 7_555 yes
   S(2)    Ti(1)   Ti(2)   S(3)    0.0      1_555 1_555 1_555 1_555 yes
   S(2)    Ti(1)   Ti(2)   C(4)    180.0    1_555 1_555 1_555 1_555 yes
   S(2)    Ti(1)   Ti(2)   C(5)    138.9(2) 1_555 1_555 1_555 1_555 yes
   S(2)    Ti(1)   Ti(2)   C(5)    -138.9(2) 1_555 1_555 1_555 7_555 yes
   S(2)    Ti(1)   Ti(2)   C(6)    100.9(5) 1_555 1_555 1_555 1_555 yes
   S(2)    Ti(1)   Ti(2)   C(6)    -100.9(5) 1_555 1_555 1_555 7_555 yes
   S(2)    Ti(1)   C(1)    C(2)    -57.6(3) 1_555 1_555 1_555 1_555 yes
   S(2)    Ti(1)   C(1)    C(2)    57.6(3)  1_555 1_555 1_555 7_555 yes
   S(2)    Ti(1)   C(2)    C(1)    147.6(3) 1_555 1_555 1_555 1_555 yes
   S(2)    Ti(1)   C(2)    C(3)    31.5(4)  1_555 1_555 1_555 1_555 yes
   S(2)    Ti(1)   C(2)    C(1)    -147.6(3) 1_555 1_555 7_555 1_555 yes
   S(2)    Ti(1)   C(2)    C(3)    -31.5(4) 1_555 1_555 7_555 7_555 yes
   S(2)    Ti(1)   C(3)    C(2)    -154.0(3) 1_555 1_555 1_555 1_555 yes
   S(2)    Ti(1)   C(3)    C(3)    90.84(4) 1_555 1_555 1_555 7_555 yes
   S(2)    Ti(1)   C(3)    C(2)    154.0(3) 1_555 1_555 7_555 7_555 yes
   S(2)    Ti(1)   C(3)    C(3)    -90.84(4) 1_555 1_555 7_555 1_555 yes
   S(3)    Ru      Ti(1)   C(1)    145.7(3) 1_555 1_555 1_555 1_555 yes
   S(3)    Ru      Ti(1)   C(2)    170.6(1) 1_555 1_555 1_555 1_555 yes
   S(3)    Ru      Ti(1)   C(2)    -151.0(6) 1_555 1_555 1_555 7_555 yes
   S(3)    Ru      Ti(1)   C(3)    -152.5(1) 1_555 1_555 1_555 1_555 yes
   S(3)    Ru      Ti(1)   C(3)    -123.5(2) 1_555 1_555 1_555 7_555 yes
   S(3)    Ru      Ti(2)   C(4)    139.3(3) 1_555 1_555 1_555 1_555 yes
   S(3)    Ru      Ti(2)   C(5)    113.8(2) 1_555 1_555 1_555 1_555 yes
   S(3)    Ru      Ti(2)   C(5)    74.8(7)  1_555 1_555 1_555 7_555 yes
   S(3)    Ru      Ti(2)   C(6)    77.4(2)  1_555 1_555 1_555 1_555 yes
   S(3)    Ru      Ti(2)   C(6)    49.7(2)  1_555 1_555 1_555 7_555 yes
   S(3)    Ru      C(7)    C(8)    96.4(5)  1_555 1_555 1_555 1_555 yes
   S(3)    Ru      C(7)    C(11)   -22.2(5) 1_555 1_555 1_555 1_555 yes
   S(3)    Ru      C(7)    C(12)   -143.8(5) 1_555 1_555 1_555 1_555 yes
   S(3)    Ru      C(8)    C(7)    -136.7(3) 1_555 1_555 1_555 1_555 yes
   S(3)    Ru      C(8)    C(9)    -20.9(4) 1_555 1_555 1_555 1_555 yes
   S(3)    Ru      C(8)    C(13)   99.5(7)  1_555 1_555 1_555 1_555 yes
   S(3)    Ru      C(9)    C(8)    165.9(3) 1_555 1_555 1_555 1_555 yes
   S(3)    Ru      C(9)    C(10)   -77.4(3) 1_555 1_555 1_555 1_555 yes
   S(3)    Ru      C(9)    C(14)   44.2(7)  1_555 1_555 1_555 1_555 yes
   S(3)    Ru      C(10)   C(9)    106.8(3) 1_555 1_555 1_555 1_555 yes
   S(3)    Ru      C(10)   C(11)   -135.8(3) 1_555 1_555 1_555 1_555 yes
   S(3)    Ru      C(10)   C(15)   -13.9(6) 1_555 1_555 1_555 1_555 yes
   S(3)    Ru      C(11)   C(7)    168.7(3) 1_555 1_555 1_555 1_555 yes
   S(3)    Ru      C(11)   C(10)   51.2(3)  1_555 1_555 1_555 1_555 yes
   S(3)    Ru      C(11)   C(16)   -68.9(6) 1_555 1_555 1_555 1_555 yes
   S(3)    Ru      Ti(1)   C(1)    -145.7(3) 1_555 7_555 1_555 1_555 yes
   S(3)    Ru      Ti(1)   C(2)    151.0(6) 1_555 7_555 1_555 1_555 yes
   S(3)    Ru      Ti(1)   C(2)    -170.6(1) 1_555 7_555 1_555 7_555 yes
   S(3)    Ru      Ti(1)   C(3)    123.5(2) 1_555 7_555 1_555 1_555 yes
   S(3)    Ru      Ti(1)   C(3)    152.5(1) 1_555 7_555 1_555 7_555 yes
   S(3)    Ru      Ti(2)   C(4)    -139.3(3) 1_555 7_555 1_555 1_555 yes
   S(3)    Ru      Ti(2)   C(5)    -74.8(7) 1_555 7_555 1_555 1_555 yes
   S(3)    Ru      Ti(2)   C(5)    -113.8(2) 1_555 7_555 1_555 7_555 yes
   S(3)    Ru      Ti(2)   C(6)    -49.7(2) 1_555 7_555 1_555 1_555 yes
   S(3)    Ru      Ti(2)   C(6)    -77.4(2) 1_555 7_555 1_555 7_555 yes
   S(3)    Ru      C(9)    C(8)    -165.9(3) 1_555 7_555 7_555 7_555 yes
   S(3)    Ru      C(9)    C(10)   77.4(3)  1_555 7_555 7_555 7_555 yes
   S(3)    Ru      C(9)    C(14)   -44.2(7) 1_555 7_555 7_555 7_555 yes
   S(3)    Ru      C(10)   C(9)    -106.8(3) 1_555 7_555 7_555 7_555 yes
   S(3)    Ru      C(10)   C(11)   135.8(3) 1_555 7_555 7_555 7_555 yes
   S(3)    Ru      C(10)   C(15)   13.9(6)  1_555 7_555 7_555 7_555 yes
   S(3)    Ti(2)   Ru      C(7)    -142.2(2) 1_555 1_555 1_555 1_555 yes
   S(3)    Ti(2)   Ru      C(8)    -165(1)  1_555 1_555 1_555 1_555 yes
   S(3)    Ti(2)   Ru      C(9)    -29.3(3) 1_555 1_555 1_555 1_555 yes
   S(3)    Ti(2)   Ru      C(10)   -64.1(2) 1_555 1_555 1_555 1_555 yes
   S(3)    Ti(2)   Ru      C(11)   -104.8(2) 1_555 1_555 1_555 1_555 yes
   S(3)    Ti(2)   Ru      C(7)    142.2(2) 1_555 1_555 7_555 7_555 yes
   S(3)    Ti(2)   Ru      C(8)    165(1)   1_555 1_555 7_555 7_555 yes
   S(3)    Ti(2)   Ru      C(9)    29.3(3)  1_555 1_555 7_555 7_555 yes
   S(3)    Ti(2)   Ru      C(10)   64.1(2)  1_555 1_555 7_555 7_555 yes
   S(3)    Ti(2)   Ru      C(11)   104.8(2) 1_555 1_555 7_555 7_555 yes
   S(3)    Ti(2)   Ti(1)   C(1)    180.0    1_555 1_555 1_555 1_555 yes
   S(3)    Ti(2)   Ti(1)   C(2)    -139.0(2) 1_555 1_555 1_555 1_555 yes
   S(3)    Ti(2)   Ti(1)   C(2)    139.0(2) 1_555 1_555 1_555 7_555 yes
   S(3)    Ti(2)   Ti(1)   C(3)    -98.4(4) 1_555 1_555 1_555 1_555 yes
   S(3)    Ti(2)   Ti(1)   C(3)    98.4(4)  1_555 1_555 1_555 7_555 yes
   S(3)    Ti(2)   C(4)    C(5)    56.5(4)  1_555 1_555 1_555 1_555 yes
   S(3)    Ti(2)   C(4)    C(5)    -56.5(4) 1_555 1_555 1_555 7_555 yes
   S(3)    Ti(2)   C(5)    C(4)    -148.4(3) 1_555 1_555 1_555 1_555 yes
   S(3)    Ti(2)   C(5)    C(6)    -32.6(4) 1_555 1_555 1_555 1_555 yes
   S(3)    Ti(2)   C(5)    C(4)    148.4(3) 1_555 1_555 7_555 1_555 yes
   S(3)    Ti(2)   C(5)    C(6)    32.6(4)  1_555 1_555 7_555 7_555 yes
   S(3)    Ti(2)   C(6)    C(5)    153.0(4) 1_555 1_555 1_555 1_555 yes
   S(3)    Ti(2)   C(6)    C(6)    -90.89(4) 1_555 1_555 1_555 7_555 yes
   S(3)    Ti(2)   C(6)    C(5)    -153.0(4) 1_555 1_555 7_555 7_555 yes
   S(3)    Ti(2)   C(6)    C(6)    90.89(4) 1_555 1_555 7_555 1_555 yes
   C(1)    Ti(1)   Ru      C(7)    -27.8(3) 1_555 1_555 1_555 1_555 yes
   C(1)    Ti(1)   Ru      C(8)    -68.7(3) 1_555 1_555 1_555 1_555 yes
   C(1)    Ti(1)   Ru      C(9)    -105.0(3) 1_555 1_555 1_555 1_555 yes
   C(1)    Ti(1)   Ru      C(10)   -37(4)   1_555 1_555 1_555 1_555 yes
   C(1)    Ti(1)   Ru      C(11)   8.0(3)   1_555 1_555 1_555 1_555 yes
   C(1)    Ti(1)   Ru      C(7)    27.8(3)  1_555 1_555 7_555 7_555 yes
   C(1)    Ti(1)   Ru      C(8)    68.7(3)  1_555 1_555 7_555 7_555 yes
   C(1)    Ti(1)   Ru      C(9)    105.0(3) 1_555 1_555 7_555 7_555 yes
   C(1)    Ti(1)   Ru      C(10)   37(4)    1_555 1_555 7_555 7_555 yes
   C(1)    Ti(1)   Ru      C(11)   -8.0(3)  1_555 1_555 7_555 7_555 yes
   C(1)    Ti(1)   Ti(2)   C(4)    0.0      1_555 1_555 1_555 1_555 yes
   C(1)    Ti(1)   Ti(2)   C(5)    -41.1(2) 1_555 1_555 1_555 1_555 yes
   C(1)    Ti(1)   Ti(2)   C(5)    41.1(2)  1_555 1_555 1_555 7_555 yes
   C(1)    Ti(1)   Ti(2)   C(6)    -79.1(5) 1_555 1_555 1_555 1_555 yes
   C(1)    Ti(1)   Ti(2)   C(6)    79.1(5)  1_555 1_555 1_555 7_555 yes
   C(1)    Ti(1)   C(2)    C(3)    -116.1(5) 1_555 1_555 1_555 1_555 yes
   C(1)    Ti(1)   C(2)    C(3)    116.1(5) 1_555 1_555 7_555 7_555 yes
   C(1)    Ti(1)   C(3)    C(2)    36.7(3)  1_555 1_555 1_555 1_555 yes
   C(1)    Ti(1)   C(3)    C(3)    -78.4(1) 1_555 1_555 1_555 7_555 yes
   C(1)    Ti(1)   C(3)    C(2)    -36.7(3) 1_555 1_555 7_555 7_555 yes
   C(1)    Ti(1)   C(3)    C(3)    78.4(1)  1_555 1_555 7_555 1_555 yes
   C(1)    C(2)    Ti(1)   C(2)    37.4(3)  1_555 1_555 1_555 7_555 yes
   C(1)    C(2)    Ti(1)   C(3)    116.1(5) 1_555 1_555 1_555 1_555 yes
   C(1)    C(2)    Ti(1)   C(3)    78.8(4)  1_555 1_555 1_555 7_555 yes
   C(1)    C(2)    C(3)    C(3)    0.5(5)   1_555 1_555 1_555 7_555 yes
   C(1)    C(2)    Ti(1)   C(2)    -37.4(3) 1_555 7_555 1_555 1_555 yes
   C(1)    C(2)    Ti(1)   C(3)    -78.8(4) 1_555 7_555 1_555 1_555 yes
   C(1)    C(2)    Ti(1)   C(3)    -116.1(5) 1_555 7_555 1_555 7_555 yes
   C(1)    C(2)    C(3)    C(3)    -0.5(5)  1_555 7_555 7_555 1_555 yes
   C(2)    Ti(1)   Ru      C(7)    -2.8(2)  1_555 1_555 1_555 1_555 yes
   C(2)    Ti(1)   Ru      C(8)    -43.8(2) 1_555 1_555 1_555 1_555 yes
   C(2)    Ti(1)   Ru      C(9)    -80.1(3) 1_555 1_555 1_555 1_555 yes
   C(2)    Ti(1)   Ru      C(10)   -12(4)   1_555 1_555 1_555 1_555 yes
   C(2)    Ti(1)   Ru      C(11)   33.0(3)  1_555 1_555 1_555 1_555 yes
   C(2)    Ti(1)   Ru      C(7)    -35.6(6) 1_555 1_555 7_555 7_555 yes
   C(2)    Ti(1)   Ru      C(8)    5.4(6)   1_555 1_555 7_555 7_555 yes
   C(2)    Ti(1)   Ru      C(9)    41.7(6)  1_555 1_555 7_555 7_555 yes
   C(2)    Ti(1)   Ru      C(10)   -26(4)   1_555 1_555 7_555 7_555 yes
   C(2)    Ti(1)   Ru      C(11)   -71.3(6) 1_555 1_555 7_555 7_555 yes
   C(2)    Ti(1)   Ti(2)   C(4)    41.0(2)  1_555 1_555 1_555 1_555 yes
   C(2)    Ti(1)   Ti(2)   C(5)    -0.1(3)  1_555 1_555 1_555 1_555 yes
   C(2)    Ti(1)   Ti(2)   C(5)    82.1(3)  1_555 1_555 1_555 7_555 yes
   C(2)    Ti(1)   Ti(2)   C(6)    -38.2(5) 1_555 1_555 1_555 1_555 yes
   C(2)    Ti(1)   Ti(2)   C(6)    120.1(5) 1_555 1_555 1_555 7_555 yes
   C(2)    Ti(1)   C(2)    C(3)    78.7(3)  1_555 1_555 7_555 7_555 yes
   C(2)    Ti(1)   C(3)    C(3)    -115.2(3) 1_555 1_555 1_555 7_555 yes
   C(2)    Ti(1)   C(3)    C(3)    37.6(2)  1_555 1_555 7_555 1_555 yes
   C(2)    C(1)    Ti(1)   C(3)    -37.2(3) 1_555 1_555 1_555 1_555 yes
   C(2)    C(1)    Ti(1)   C(3)    -78.0(4) 1_555 1_555 1_555 7_555 yes
   C(2)    C(1)    C(2)    C(3)    0.8(8)   1_555 1_555 7_555 7_555 yes
   C(2)    C(3)    Ti(1)   C(3)    115.2(3) 1_555 1_555 1_555 7_555 yes
   C(2)    C(3)    C(3)    C(2)    0.0      1_555 1_555 7_555 7_555 yes
   C(3)    Ti(1)   Ru      C(7)    34.1(2)  1_555 1_555 1_555 1_555 yes
   C(3)    Ti(1)   Ru      C(8)    -6.9(2)  1_555 1_555 1_555 1_555 yes
   C(3)    Ti(1)   Ru      C(9)    -43.2(3) 1_555 1_555 1_555 1_555 yes
   C(3)    Ti(1)   Ru      C(10)   24(4)    1_555 1_555 1_555 1_555 yes
   C(3)    Ti(1)   Ru      C(11)   69.9(2)  1_555 1_555 1_555 1_555 yes
   C(3)    Ti(1)   Ru      C(7)    -63.0(2) 1_555 1_555 7_555 7_555 yes
   C(3)    Ti(1)   Ru      C(8)    -22.0(3) 1_555 1_555 7_555 7_555 yes
   C(3)    Ti(1)   Ru      C(9)    14.3(3)  1_555 1_555 7_555 7_555 yes
   C(3)    Ti(1)   Ru      C(10)   -53(4)   1_555 1_555 7_555 7_555 yes
   C(3)    Ti(1)   Ru      C(11)   -98.8(3) 1_555 1_555 7_555 7_555 yes
   C(3)    Ti(1)   Ti(2)   C(4)    81.6(4)  1_555 1_555 1_555 1_555 yes
   C(3)    Ti(1)   Ti(2)   C(5)    40.5(5)  1_555 1_555 1_555 1_555 yes
   C(3)    Ti(1)   Ti(2)   C(5)    122.7(5) 1_555 1_555 1_555 7_555 yes
   C(3)    Ti(1)   Ti(2)   C(6)    2.5(6)   1_555 1_555 1_555 1_555 yes
   C(3)    Ti(1)   Ti(2)   C(6)    160.7(6) 1_555 1_555 1_555 7_555 yes
   C(4)    Ti(2)   Ru      C(7)    -2.9(4)  1_555 1_555 1_555 1_555 yes
   C(4)    Ti(2)   Ru      C(8)    -26(1)   1_555 1_555 1_555 1_555 yes
   C(4)    Ti(2)   Ru      C(9)    110.1(4) 1_555 1_555 1_555 1_555 yes
   C(4)    Ti(2)   Ru      C(10)   75.2(4)  1_555 1_555 1_555 1_555 yes
   C(4)    Ti(2)   Ru      C(11)   34.5(4)  1_555 1_555 1_555 1_555 yes
   C(4)    Ti(2)   Ru      C(7)    2.9(4)   1_555 1_555 7_555 7_555 yes
   C(4)    Ti(2)   Ru      C(8)    26(1)    1_555 1_555 7_555 7_555 yes
   C(4)    Ti(2)   Ru      C(9)    -110.1(4) 1_555 1_555 7_555 7_555 yes
   C(4)    Ti(2)   Ru      C(10)   -75.2(4) 1_555 1_555 7_555 7_555 yes
   C(4)    Ti(2)   Ru      C(11)   -34.5(4) 1_555 1_555 7_555 7_555 yes
   C(4)    Ti(2)   C(5)    C(6)    115.9(6) 1_555 1_555 1_555 1_555 yes
   C(4)    Ti(2)   C(5)    C(6)    -115.9(6) 1_555 1_555 7_555 7_555 yes
   C(4)    Ti(2)   C(6)    C(5)    -37.4(4) 1_555 1_555 1_555 1_555 yes
   C(4)    Ti(2)   C(6)    C(6)    78.8(1)  1_555 1_555 1_555 7_555 yes
   C(4)    Ti(2)   C(6)    C(5)    37.4(4)  1_555 1_555 7_555 7_555 yes
   C(4)    Ti(2)   C(6)    C(6)    -78.8(1) 1_555 1_555 7_555 1_555 yes
   C(4)    C(5)    Ti(2)   C(5)    -38.6(4) 1_555 1_555 1_555 7_555 yes
   C(4)    C(5)    Ti(2)   C(6)    -115.9(6) 1_555 1_555 1_555 1_555 yes
   C(4)    C(5)    Ti(2)   C(6)    -79.7(4) 1_555 1_555 1_555 7_555 yes
   C(4)    C(5)    C(6)    C(6)    -1.2(6)  1_555 1_555 1_555 7_555 yes
   C(4)    C(5)    Ti(2)   C(5)    38.6(4)  1_555 7_555 1_555 1_555 yes
   C(4)    C(5)    Ti(2)   C(6)    79.7(4)  1_555 7_555 1_555 1_555 yes
   C(4)    C(5)    Ti(2)   C(6)    115.9(6) 1_555 7_555 1_555 7_555 yes
   C(4)    C(5)    C(6)    C(6)    1.2(6)   1_555 7_555 7_555 1_555 yes
   C(5)    Ti(2)   Ru      C(7)    -28.4(3) 1_555 1_555 1_555 1_555 yes
   C(5)    Ti(2)   Ru      C(8)    -52(1)   1_555 1_555 1_555 1_555 yes
   C(5)    Ti(2)   Ru      C(9)    84.5(3)  1_555 1_555 1_555 1_555 yes
   C(5)    Ti(2)   Ru      C(10)   49.7(2)  1_555 1_555 1_555 1_555 yes
   C(5)    Ti(2)   Ru      C(11)   9.0(2)   1_555 1_555 1_555 1_555 yes
   C(5)    Ti(2)   Ru      C(7)    67.4(7)  1_555 1_555 7_555 7_555 yes
   C(5)    Ti(2)   Ru      C(8)    90(1)    1_555 1_555 7_555 7_555 yes
   C(5)    Ti(2)   Ru      C(9)    -45.6(8) 1_555 1_555 7_555 7_555 yes
   C(5)    Ti(2)   Ru      C(10)   -10.7(7) 1_555 1_555 7_555 7_555 yes
   C(5)    Ti(2)   Ru      C(11)   30.0(7)  1_555 1_555 7_555 7_555 yes
   C(5)    Ti(2)   C(5)    C(6)    -77.2(4) 1_555 1_555 7_555 7_555 yes
   C(5)    Ti(2)   C(6)    C(6)    116.1(4) 1_555 1_555 1_555 7_555 yes
   C(5)    Ti(2)   C(6)    C(6)    -37.2(2) 1_555 1_555 7_555 1_555 yes
   C(5)    C(4)    Ti(2)   C(6)    36.8(4)  1_555 1_555 1_555 1_555 yes
   C(5)    C(4)    Ti(2)   C(6)    76.3(5)  1_555 1_555 1_555 7_555 yes
   C(5)    C(4)    C(5)    C(6)    -1.8(9)  1_555 1_555 7_555 7_555 yes
   C(5)    C(6)    Ti(2)   C(6)    -116.1(4) 1_555 1_555 1_555 7_555 yes
   C(5)    C(6)    C(6)    C(5)    0.0      1_555 1_555 7_555 7_555 yes
   C(6)    Ti(2)   Ru      C(7)    -64.8(3) 1_555 1_555 1_555 1_555 yes
   C(6)    Ti(2)   Ru      C(8)    -88(1)   1_555 1_555 1_555 1_555 yes
   C(6)    Ti(2)   Ru      C(9)    48.1(3)  1_555 1_555 1_555 1_555 yes
   C(6)    Ti(2)   Ru      C(10)   13.3(2)  1_555 1_555 1_555 1_555 yes
   C(6)    Ti(2)   Ru      C(11)   -27.4(2) 1_555 1_555 1_555 1_555 yes
   C(6)    Ti(2)   Ru      C(7)    92.6(3)  1_555 1_555 7_555 7_555 yes
   C(6)    Ti(2)   Ru      C(8)    116(1)   1_555 1_555 7_555 7_555 yes
   C(6)    Ti(2)   Ru      C(9)    -20.4(3) 1_555 1_555 7_555 7_555 yes
   C(6)    Ti(2)   Ru      C(10)   14.5(2)  1_555 1_555 7_555 7_555 yes
   C(6)    Ti(2)   Ru      C(11)   55.2(2)  1_555 1_555 7_555 7_555 yes
   C(7)    Ru      C(8)    C(9)    115.8(4) 1_555 1_555 1_555 1_555 yes
   C(7)    Ru      C(8)    C(13)   -123.8(9) 1_555 1_555 1_555 1_555 yes
   C(7)    Ru      C(9)    C(8)    -37.6(3) 1_555 1_555 1_555 1_555 yes
   C(7)    Ru      C(9)    C(10)   79.1(3)  1_555 1_555 1_555 1_555 yes
   C(7)    Ru      C(9)    C(14)   -159.3(8) 1_555 1_555 1_555 1_555 yes
   C(7)    Ru      C(10)   C(9)    -79.9(3) 1_555 1_555 1_555 1_555 yes
   C(7)    Ru      C(10)   C(11)   37.5(3)  1_555 1_555 1_555 1_555 yes
   C(7)    Ru      C(10)   C(15)   159.4(7) 1_555 1_555 1_555 1_555 yes
   C(7)    Ru      C(11)   C(10)   -117.5(4) 1_555 1_555 1_555 1_555 yes
   C(7)    Ru      C(11)   C(16)   122.4(7) 1_555 1_555 1_555 1_555 yes
   C(7)    C(8)    Ru      C(9)    -115.8(4) 1_555 1_555 1_555 1_555 yes
   C(7)    C(8)    Ru      C(10)   -78.1(3) 1_555 1_555 1_555 1_555 yes
   C(7)    C(8)    Ru      C(11)   -36.8(3) 1_555 1_555 1_555 1_555 yes
   C(7)    C(8)    C(9)    C(10)   -0.5(5)  1_555 1_555 1_555 1_555 yes
   C(7)    C(8)    C(9)    C(14)   -177.7(4) 1_555 1_555 1_555 1_555 yes
   C(7)    C(11)   Ru      C(8)    36.4(3)  1_555 1_555 1_555 1_555 yes
   C(7)    C(11)   Ru      C(9)    79.7(3)  1_555 1_555 1_555 1_555 yes
   C(7)    C(11)   Ru      C(10)   117.5(4) 1_555 1_555 1_555 1_555 yes
   C(7)    C(11)   C(10)   C(9)    -1.2(5)  1_555 1_555 1_555 1_555 yes
   C(7)    C(11)   C(10)   C(15)   176.2(4) 1_555 1_555 1_555 1_555 yes
   C(8)    Ru      C(7)    C(11)   -118.6(4) 1_555 1_555 1_555 1_555 yes
   C(8)    Ru      C(7)    C(12)   119.8(8) 1_555 1_555 1_555 1_555 yes
   C(8)    Ru      C(9)    C(10)   116.8(4) 1_555 1_555 1_555 1_555 yes
   C(8)    Ru      C(9)    C(14)   -121.7(8) 1_555 1_555 1_555 1_555 yes
   C(8)    Ru      C(10)   C(9)    -38.2(3) 1_555 1_555 1_555 1_555 yes
   C(8)    Ru      C(10)   C(11)   79.2(3)  1_555 1_555 1_555 1_555 yes
   C(8)    Ru      C(10)   C(15)   -158.9(7) 1_555 1_555 1_555 1_555 yes
   C(8)    Ru      C(11)   C(10)   -81.1(3) 1_555 1_555 1_555 1_555 yes
   C(8)    Ru      C(11)   C(16)   158.7(7) 1_555 1_555 1_555 1_555 yes
   C(8)    C(7)    Ru      C(9)    39.0(3)  1_555 1_555 1_555 1_555 yes
   C(8)    C(7)    Ru      C(10)   81.8(3)  1_555 1_555 1_555 1_555 yes
   C(8)    C(7)    Ru      C(11)   118.6(4) 1_555 1_555 1_555 1_555 yes
   C(8)    C(7)    C(11)   C(10)   0.9(6)   1_555 1_555 1_555 1_555 yes
   C(8)    C(7)    C(11)   C(16)   177.1(4) 1_555 1_555 1_555 1_555 yes
   C(8)    C(9)    Ru      C(10)   -116.8(4) 1_555 1_555 1_555 1_555 yes
   C(8)    C(9)    Ru      C(11)   -80.0(3) 1_555 1_555 1_555 1_555 yes
   C(8)    C(9)    C(10)   C(11)   1.0(5)   1_555 1_555 1_555 1_555 yes
   C(8)    C(9)    C(10)   C(15)   -176.4(4) 1_555 1_555 1_555 1_555 yes
   C(9)    Ru      C(7)    C(11)   -79.7(3) 1_555 1_555 1_555 1_555 yes
   C(9)    Ru      C(7)    C(12)   158.8(7) 1_555 1_555 1_555 1_555 yes
   C(9)    Ru      C(8)    C(13)   120.4(9) 1_555 1_555 1_555 1_555 yes
   C(9)    Ru      C(10)   C(11)   117.4(4) 1_555 1_555 1_555 1_555 yes
   C(9)    Ru      C(10)   C(15)   -120.7(7) 1_555 1_555 1_555 1_555 yes
   C(9)    Ru      C(11)   C(10)   -37.9(3) 1_555 1_555 1_555 1_555 yes
   C(9)    Ru      C(11)   C(16)   -158.0(7) 1_555 1_555 1_555 1_555 yes
   C(9)    C(8)    Ru      C(10)   37.7(3)  1_555 1_555 1_555 1_555 yes
   C(9)    C(8)    Ru      C(11)   79.0(3)  1_555 1_555 1_555 1_555 yes
   C(9)    C(8)    C(7)    C(11)   -0.2(5)  1_555 1_555 1_555 1_555 yes
   C(9)    C(8)    C(7)    C(12)   177.9(4) 1_555 1_555 1_555 1_555 yes
   C(9)    C(10)   Ru      C(11)   -117.4(4) 1_555 1_555 1_555 1_555 yes
   C(9)    C(10)   C(11)   C(16)   -177.5(4) 1_555 1_555 1_555 1_555 yes
   C(10)   Ru      C(7)    C(11)   -36.8(3) 1_555 1_555 1_555 1_555 yes
   C(10)   Ru      C(7)    C(12)   -158.3(7) 1_555 1_555 1_555 1_555 yes
   C(10)   Ru      C(8)    C(13)   158.1(8) 1_555 1_555 1_555 1_555 yes
   C(10)   Ru      C(9)    C(14)   121.5(8) 1_555 1_555 1_555 1_555 yes
   C(10)   Ru      C(11)   C(16)   -120.1(7) 1_555 1_555 1_555 1_555 yes
   C(10)   C(9)    Ru      C(11)   36.8(3)  1_555 1_555 1_555 1_555 yes
   C(10)   C(9)    C(8)    C(13)   177.8(5) 1_555 1_555 1_555 1_555 yes
   C(10)   C(11)   C(7)    C(12)   -177.2(4) 1_555 1_555 1_555 1_555 yes
   C(11)   Ru      C(7)    C(12)   -121.5(7) 1_555 1_555 1_555 1_555 yes
   C(11)   Ru      C(8)    C(13)   -160.6(8) 1_555 1_555 1_555 1_555 yes
   C(11)   Ru      C(9)    C(14)   158.3(8) 1_555 1_555 1_555 1_555 yes
   C(11)   Ru      C(10)   C(15)   121.9(7) 1_555 1_555 1_555 1_555 yes
   C(11)   C(7)    C(8)    C(13)   -178.5(5) 1_555 1_555 1_555 1_555 yes
   C(11)   C(10)   C(9)    C(14)   178.3(4) 1_555 1_555 1_555 1_555 yes
   C(12)   C(7)    C(8)    C(13)   -0.4(8)  1_555 1_555 1_555 1_555 yes
   C(12)   C(7)    C(11)   C(16)   -1.0(8)  1_555 1_555 1_555 1_555 yes
   C(13)   C(8)    C(9)    C(14)   0.6(8)   1_555 1_555 1_555 1_555 yes
   C(14)   C(9)    C(10)   C(15)   0.9(7)   1_555 1_555 1_555 1_555 yes
   C(15)   C(10)   C(11)   C(16)   0.0(8)   1_555 1_555 1_555 1_555 yes
#------------------------------------------------------------------------------
loop_
_geom_contact_atom_site_label_1
_geom_contact_atom_site_label_2
_geom_contact_distance
_geom_contact_site_symmetry_1
_geom_contact_site_symmetry_2
_geom_contact_publ_flag
 Ru        Ti(1)     2.9440(8)  1_555 1_555 ?
 Ru        Ti(2)     2.9269(8)  1_555 1_555 ?
 Ti(1)     Ti(2)     3.060(1)   1_555 1_555 ?
#------------------------------------------------------------------------------

_publ_contact_author_name           'Masanobu Hidai'

_publ_contact_author_address
;
    Department of Chemistry and Biotechnology, Graduate School of Engineering, The University of Tokyo, Hongo, Bunkyo-ku, Tokyo 113-8656, Japan

;
_publ_contact_author_email            ' hidai@chembio.t.u-tokyo.ac.jp '
_publ_contact_author_fax              ' +81-3-5800-6945 '
_publ_contact_author_phone            ' +81-3-3812-2111 '
_publ_contact_letter
;
    ENTER TEXT OF LETTER
;
_publ_requested_journal               ' Journal of the American Chemical Society'
_publ_requested_category              ' -'

_publ_requested_coeditor_name          ?

_publ_section_title
;
    Electron-Deficient Early-Late Heterobimetallic Sulfido Clusters.  Unusual Reactivities of Ti2Ru2S4 Cubane-Type Clusters with Four Cyclopentadienyl Coligands
;

_publ_section_title_footnote
;
    -
;
loop_
_publ_author_name
_publ_author_footnote
_publ_author_address' Shin-ichiro Kabashima '
;
  Department of Chemistry and Biotechnology, Graduate School of Engineering, The University of Tokyo, Hongo, Bunkyo-ku, Tokyo 113-8656, Japan

;

_publ_section_synopsis
;
    -
;

_publ_section_abstract
;
    -
;

_publ_section_comment
;
    -
;

_publ_section_acknowledgements
;
    -
;

_publ_section_experimental
;
    -
;

_publ_section_references
;
Molecular Structure Corporation, Rigaku Corporation. (1998). teXsan. 
Single Crystal Structure Analysis Software. Version 1.9.
MSC, 3200 Research Forest Drive, The Woodlands, TX 77381, USA.
Rigaku, 3-9-12 Akishima, Tokyo, Japan.
North, A.C.T., Phillips, D. C. & Mathews, F. S. (1968).
Acta Cryst. A24, 351-359.
Zachariasen, W. H. (1967). Acta Cryst. 23, 558-564.
;

_publ_section_table_legends
;
    -
;

_publ_section_figure_captions
;
    -
;

_publ_section_exptl_prep
;
    -
;

_publ_section_exptl_refinement
;
    -
;


data_[(CpTi)2(Cp*Ru)2S4][PF6]2.2DMF(5.2DMF)
#------------------------------------------------------------------------------
_audit_creation_date                  'Fri Oct 30 23:01:58 1998'
_audit_creation_method                'from TEXRAY.INF file'
_audit_update_record                   ?
#------------------------------------------------------------------------------
_computing_data_collection            'Rigaku/AFC Diffractometer Control'
_computing_cell_refinement            'Rigaku/AFC Diffractometer Control'
_computing_data_reduction             'teXsan'
_computing_structure_solution          SIR92
_computing_structure_refinement       'teXsan'
_computing_publication_material       'teXsan'
_computing_molecular_graphics          ?
#------------------------------------------------------------------------------
_chemical_compound_source              ?
_chemical_name_common                  ?
_chemical_formula_weight               1262.94
_chemical_formula_analytical           ?
_chemical_formula_sum                  'C36 H54 F12 N2 O2 P2 S4 Ru2 Ti2 '
_chemical_formula_moiety               '?'
_chemical_formula_structural           ?
_chemical_melting_point                ?
#------------------------------------------------------------------------------
_cell_length_a                         20.284(4)
_cell_length_b                         11.094(4)
_cell_length_c                         21.909(4)
_cell_angle_alpha                      90
_cell_angle_beta                       105.36(2)
_cell_angle_gamma                      90
_cell_volume                           4753(2)
_cell_formula_units_Z                  4
_cell_measurement_temperature          296.2
_cell_measurement_reflns_used          25
_cell_measurement_theta_min            19.3
_cell_measurement_theta_max            20.0
#------------------------------------------------------------------------------
_symmetry_cell_setting                 monoclinic
_symmetry_space_group_name_H-M        'P 21/n       '
_symmetry_Int_Tables_number            14
_symmetry_space_group_name_Hall        ?
loop_
_symmetry_equiv_pos_as_xyz
x,y,z
1/2-x,1/2+y,1/2-z
-x,-y,-z
1/2+x,1/2-y,1/2+z
#------------------------------------------------------------------------------
_exptl_crystal_description            'prismatic'
_exptl_crystal_colour                 'darkred'
_exptl_crystal_size_max                0.500
_exptl_crystal_size_mid                0.200
_exptl_crystal_size_min                0.200
_exptl_crystal_density_diffrn          1.764
_exptl_crystal_density_method         'not measured'
_exptl_crystal_F_000                   2536.00
_exptl_absorpt_coefficient_mu          1.272
_exptl_absorpt_correction_type         psi-scan
_exptl_absorpt_process_details        '(North, Phillips & Mathews, 1968)'
_exptl_absorpt_correction_T_min        0.758
_exptl_absorpt_correction_T_max        0.999
_exptl_special_details
;
 ?
;
#------------------------------------------------------------------------------
_diffrn_special_details
;
 ?
;
_diffrn_ambient_temperature            296.2
_diffrn_radiation_wavelength           0.7107
_diffrn_radiation_type                'Mo K\a'
_diffrn_radiation_source              'Rigaku rotating anode'
_diffrn_radiation_monochromator        graphite
_diffrn_radiation_detector            'scintillation counter'
_diffrn_measurement_device_type       'Rigaku AFC7R'
_diffrn_measurement_method             \w-2\q

_diffrn_standards_number              3
_diffrn_standards_interval_count      150
_diffrn_standards_decay_%             3.11
loop_
_diffrn_standard_refln_index_h
_diffrn_standard_refln_index_k
_diffrn_standard_refln_index_l
      3      -1     -1
      3       0     -3
      2       0      2
_diffrn_reflns_number                  11211
_reflns_number_total                   10911
_reflns_number_gt                      6494
_reflns_observed_expression             >2.0sigma(I)
_diffrn_reflns_av_R_equivalents        0.032
_diffrn_reflns_av_sigmaI/netI          0.099
_diffrn_reflns_limit_h_min             0
_diffrn_reflns_limit_h_max             26
_diffrn_reflns_limit_k_min             0
_diffrn_reflns_limit_k_max             14
_diffrn_reflns_limit_l_min             -28
_diffrn_reflns_limit_l_max             27
_diffrn_reflns_theta_min               2.52
_diffrn_reflns_theta_max               27.50
_diffrn_reflns_reduction_process      'Lp corrections applied'
_diffrn_orient_matrix_UB_11            0.04586
_diffrn_orient_matrix_UB_12            0.03985
_diffrn_orient_matrix_UB_13            0.01130
_diffrn_orient_matrix_UB_21            0.00950
_diffrn_orient_matrix_UB_22           -0.03419
_diffrn_orient_matrix_UB_23            0.04370
_diffrn_orient_matrix_UB_31            0.02051
_diffrn_orient_matrix_UB_32           -0.07327
_diffrn_orient_matrix_UB_33           -0.01425
#------------------------------------------------------------------------------
loop_
_atom_type_symbol
_atom_type_description
_atom_type_scat_dispersion_real
_atom_type_scat_imag
_atom_type_scat_source
  'C'  'C'   0.003 0.002 
;International Tables for Crystallography
(1992, Vol. C, Tables 4.2.6.8 and 6.1.1.1)
;
  'H'  'H'   0.000 0.000 
;International Tables for Crystallography
(1992, Vol. C, Table 6.1.1.2)
;
  'S'  'S'   0.125 0.123 
;International Tables for Crystallography
(1992, Vol. C, Tables 4.2.6.8 and 6.1.1.1)
;
  'P'  'P'   0.102 0.094 
;International Tables for Crystallography
(1992, Vol. C, Tables 4.2.6.8 and 6.1.1.1)
;
  'F'  'F'   0.017 0.010 
;International Tables for Crystallography
(1992, Vol. C, Tables 4.2.6.8 and 6.1.1.1)
;
  'TiTi'   0.278 0.446 
;International Tables for Crystallography
(1992, Vol. C, Tables 4.2.6.8 and 6.1.1.1)
;
  'RuRu'   -1.259 0.836 
;International Tables for Crystallography
(1992, Vol. C, Tables 4.2.6.8 and 6.1.1.1)
;
  'N'  'N'   0.006 0.003 
;International Tables for Crystallography
(1992, Vol. C, Tables 4.2.6.8 and 6.1.1.1)
;
  'O'  'O'   0.011 0.006 
;International Tables for Crystallography
(1992, Vol. C, Tables 4.2.6.8 and 6.1.1.1)
;
#------------------------------------------------------------------------------
loop_
_atom_site_label
_atom_site_type_symbol
_atom_site_fract_x
_atom_site_fract_y
_atom_site_fract_z
_atom_site_U_iso_or_equiv
_atom_site_adp_type
_atom_site_occupancy
_atom_site_calc_flags
_atom_site_refinement_flags
_atom_site_disorder_assembly
_atom_site_disorder_group
 Ru(1)  Ru 0.19120(3)  0.12677(5)  0.01113(2)  0.0289(1)   Uani 1.00 d ...
 Ru(2)  Ru 0.31611(2)  0.14641(5)  0.10468(2)  0.0281(1)   Uani 1.00 d ...
 Ti(1)  Ti 0.31585(6)  0.2072(1)   -0.02713(5) 0.0343(3)   Uani 1.00 d ...
 Ti(2)  Ti 0.24378(6)  0.3733(1)   0.04940(5)  0.0337(3)   Uani 1.00 d ...
 S(1)   S  0.20822(8)  0.2956(1)   -0.05215(7) 0.0354(5)   Uani 1.00 d ...
 S(2)   S  0.35785(8)  0.3234(1)   0.06291(7)  0.0361(5)   Uani 1.00 d ...
 S(3)   S  0.29377(8)  0.0278(1)   0.01393(7)  0.0334(5)   Uani 1.00 d ...
 S(4)   S  0.21073(8)  0.2273(1)   0.10791(7)  0.0329(5)   Uani 1.00 d ...
 P(1)   P  -0.0051(1)  0.5504(2)   -0.1497(1)  0.0599(7)   Uani 1.00 d ...
 P(2)   P  0.3915(1)   0.7045(2)   -0.0621(1)  0.0625(8)   Uani 1.00 d ...
 F(1)   F  0.0029(3)   0.5624(6)   -0.2182(2)  0.126(3)    Uani 1.00 d ...
 F(2)   F  -0.0751(3)  0.6150(7)   -0.1720(3)  0.157(3)    Uani 1.00 d ...
 F(3)   F  0.0297(3)   0.6742(5)   -0.1336(3)  0.135(3)    Uani 1.00 d ...
 F(4)   F  -0.0140(3)  0.5377(5)   -0.0815(2)  0.113(2)    Uani 1.00 d ...
 F(5)   F  0.0645(3)   0.4879(7)   -0.1272(3)  0.144(3)    Uani 1.00 d ...
 F(6)   F  -0.0424(4)  0.4289(6)   -0.1661(3)  0.153(3)    Uani 1.00 d ...
 F(7)   F  0.3840(4)   0.657(1)    -0.1275(3)  0.222(4)    Uani 1.00 d ...
 F(8)   F  0.3222(3)   0.7567(8)   -0.0764(5)  0.230(4)    Uani 1.00 d ...
 F(9)   F  0.4194(6)   0.8209(8)   -0.0705(6)  0.294(7)    Uani 1.00 d ...
 F(10)  F  0.4000(4)   0.7360(9)   0.0044(3)   0.215(4)    Uani 1.00 d ...
 F(11)  F  0.4626(3)   0.6607(10)  -0.0511(4)  0.222(4)    Uani 1.00 d ...
 F(12)  F  0.3596(6)   0.5898(7)   -0.0531(5)  0.268(6)    Uani 1.00 d ...
 O(1)   O  0.2045(4)   -0.0017(9)  -0.2222(4)  0.132(4)    Uani 1.00 d ...
 O(2)   O  -0.1024(3)  -0.0520(6)  -0.2646(3)  0.092(3)    Uani 1.00 d ...
 N(1)   N  0.2926(4)   -0.037(1)   -0.2632(4)  0.098(4)    Uani 1.00 d ...
 N(2)   N  -0.0076(3)  -0.1179(6)  -0.2900(3)  0.055(2)    Uani 1.00 d ...
 C(1)   C  0.3441(5)   0.3028(8)   -0.1108(4)  0.062(3)    Uani 1.00 d ...
 C(2)   C  0.4032(5)   0.2854(9)   -0.0654(4)  0.068(3)    Uani 1.00 d ...
 C(3)   C  0.4147(4)   0.163(1)    -0.0561(4)  0.074(3)    Uani 1.00 d ...
 C(4)   C  0.3592(5)   0.1042(8)   -0.0997(4)  0.068(3)    Uani 1.00 d ...
 C(5)   C  0.3170(4)   0.1930(10)  -0.1327(3)  0.065(3)    Uani 1.00 d ...
 C(6)   C  0.1889(4)   0.5159(6)   0.0980(4)   0.050(2)    Uani 1.00 d ...
 C(7)   C  0.2574(4)   0.5454(6)   0.1116(3)   0.051(2)    Uani 1.00 d ...
 C(8)   C  0.2723(4)   0.5762(6)   0.0545(4)   0.056(3)    Uani 1.00 d ...
 C(9)   C  0.2133(5)   0.5626(7)   0.0064(3)   0.063(3)    Uani 1.00 d ...
 C(10)  C  0.1602(4)   0.5238(7)   0.0332(4)   0.062(3)    Uani 1.00 d ...
 C(11)  C  0.1340(3)   -0.0448(6)  0.0174(3)   0.040(2)    Uani 1.00 d ...
 C(12)  C  0.1368(3)   -0.0300(6)  -0.0465(3)  0.042(2)    Uani 1.00 d ...
 C(13)  C  0.1018(3)   0.0773(6)   -0.0692(3)  0.043(2)    Uani 1.00 d ...
 C(14)  C  0.0787(3)   0.1312(6)   -0.0199(3)  0.042(2)    Uani 1.00 d ...
 C(15)  C  0.0968(3)   0.0535(6)   0.0331(3)   0.038(2)    Uani 1.00 d ...
 C(16)  C  0.1582(4)   -0.1540(7)  0.0573(4)   0.060(3)    Uani 1.00 d ...
 C(17)  C  0.1652(4)   -0.1216(7)  -0.0835(4)  0.065(3)    Uani 1.00 d ...
 C(18)  C  0.0871(4)   0.1204(8)   -0.1371(3)  0.066(3)    Uani 1.00 d ...
 C(19)  C  0.0345(4)   0.2414(7)   -0.0270(4)  0.069(3)    Uani 1.00 d ...
 C(20)  C  0.0727(3)   0.0677(7)   0.0913(3)   0.062(3)    Uani 1.00 d ...
 C(21)  C  0.3211(3)   0.0453(6)   0.1947(3)   0.041(2)    Uani 1.00 d ...
 C(22)  C  0.3546(3)   0.1600(6)   0.2103(3)   0.038(2)    Uani 1.00 d ...
 C(23)  C  0.4124(3)   0.1595(6)   0.1846(3)   0.037(2)    Uani 1.00 d ...
 C(24)  C  0.4126(3)   0.0504(6)   0.1515(3)   0.038(2)    Uani 1.00 d ...
 C(25)  C  0.3574(3)   -0.0225(6)  0.1593(3)   0.039(2)    Uani 1.00 d ...
 C(26)  C  0.2625(4)   0.0018(8)   0.2190(3)   0.067(3)    Uani 1.00 d ...
 C(27)  C  0.3382(4)   0.2536(7)   0.2531(3)   0.068(3)    Uani 1.00 d ...
 C(28)  C  0.4673(4)   0.2540(7)   0.1975(3)   0.064(3)    Uani 1.00 d ...
 C(29)  C  0.4676(4)   0.0097(8)   0.1215(3)   0.063(3)    Uani 1.00 d ...
 C(30)  C  0.3467(4)   -0.1537(6)  0.1413(3)   0.061(2)    Uani 1.00 d ...
 C(31)  C  0.2485(7)   -0.061(1)   -0.2302(6)  0.144(7)    Uani 1.00 d ...
 C(32)  C  0.2914(7)   0.065(1)    -0.3011(6)  0.146(6)    Uani 1.00 d ...
 C(33)  C  0.3467(6)   -0.118(1)   -0.2591(5)  0.140(6)    Uani 1.00 d ...
 C(34)  C  -0.0480(4)  -0.1018(8)  -0.2518(4)  0.061(3)    Uani 1.00 d ...
 C(35)  C  -0.0251(5)  -0.0728(9)  -0.3542(4)  0.097(4)    Uani 1.00 d ...
 C(36)  C  0.0575(4)   -0.1798(10) -0.2714(4)  0.095(4)    Uani 1.00 d ...
 H(1)   H  0.3247      0.3790      -0.1252     0.0749      Uiso 1.00 calc ...
 H(2)   H  0.4322      0.3474      -0.0433     0.0822      Uiso 1.00 calc ...
 H(3)   H  0.4520      0.1254      -0.0267     0.0892      Uiso 1.00 calc ...
 H(4)   H  0.3526      0.0197      -0.1050     0.0810      Uiso 1.00 calc ...
 H(5)   H  0.2760      0.1802      -0.1651     0.0783      Uiso 1.00 calc ...
 H(6)   H  0.1652      0.4936      0.1283      0.0600      Uiso 1.00 calc ...
 H(7)   H  0.2889      0.5449      0.1524      0.0616      Uiso 1.00 calc ...
 H(8)   H  0.3154      0.6019      0.0499      0.0672      Uiso 1.00 calc ...
 H(9)   H  0.2088      0.5767      -0.0373     0.0759      Uiso 1.00 calc ...
 H(10)  H  0.1142      0.5067      0.0111      0.0749      Uiso 1.00 calc ...
 H(11)  H  0.1506      -0.1429     0.0979      0.0726      Uiso 1.00 calc ...
 H(12)  H  0.1336      -0.2228     0.0376      0.0726      Uiso 1.00 calc ...
 H(13)  H  0.2056      -0.1654     0.0617      0.0726      Uiso 1.00 calc ...
 H(14)  H  0.1397      -0.1942     -0.0867     0.0784      Uiso 1.00 calc ...
 H(15)  H  0.1621      -0.0912     -0.1247     0.0784      Uiso 1.00 calc ...
 H(16)  H  0.2117      -0.1372     -0.0624     0.0784      Uiso 1.00 calc ...
 H(17)  H  0.0634      0.1951      -0.1412     0.0787      Uiso 1.00 calc ...
 H(18)  H  0.1289      0.1306      -0.1482     0.0787      Uiso 1.00 calc ...
 H(19)  H  0.0597      0.0624      -0.1643     0.0787      Uiso 1.00 calc ...
 H(20)  H  0.0572      0.3072      -0.0404     0.0822      Uiso 1.00 calc ...
 H(21)  H  -0.0076     0.2265      -0.0575     0.0822      Uiso 1.00 calc ...
 H(22)  H  0.0260      0.2602      0.0125      0.0822      Uiso 1.00 calc ...
 H(23)  H  0.0877      0.1432      0.1105      0.0746      Uiso 1.00 calc ...
 H(24)  H  0.0242      0.0646      0.0803      0.0746      Uiso 1.00 calc ...
 H(25)  H  0.0909      0.0045      0.1201      0.0746      Uiso 1.00 calc ...
 H(26)  H  0.2253      0.0565      0.2065      0.0804      Uiso 1.00 calc ...
 H(27)  H  0.2485      -0.0757     0.2020      0.0804      Uiso 1.00 calc ...
 H(28)  H  0.2766      -0.0029     0.2639      0.0804      Uiso 1.00 calc ...
 H(29)  H  0.3448      0.2209      0.2943      0.0813      Uiso 1.00 calc ...
 H(30)  H  0.3675      0.3211      0.2548      0.0813      Uiso 1.00 calc ...
 H(31)  H  0.2920      0.2782      0.2372      0.0813      Uiso 1.00 calc ...
 H(32)  H  0.5090      0.2197      0.2216      0.0768      Uiso 1.00 calc ...
 H(33)  H  0.4731      0.2834      0.1585      0.0768      Uiso 1.00 calc ...
 H(34)  H  0.4546      0.3184      0.2205      0.0768      Uiso 1.00 calc ...
 H(35)  H  0.4558      -0.0670     0.1024      0.0753      Uiso 1.00 calc ...
 H(36)  H  0.4717      0.0663      0.0902      0.0753      Uiso 1.00 calc ...
 H(37)  H  0.5098      0.0040      0.1531      0.0753      Uiso 1.00 calc ...
 H(38)  H  0.3065      -0.1821     0.1511      0.0734      Uiso 1.00 calc ...
 H(39)  H  0.3420      -0.1624     0.0972      0.0734      Uiso 1.00 calc ...
 H(40)  H  0.3850      -0.1992     0.1643      0.0734      Uiso 1.00 calc ...
 H(41)  H  0.2536      -0.1374     -0.2098     0.1695      Uiso 1.00 calc ...
 H(42)  H  0.2969      0.1358      -0.2755     0.1759      Uiso 1.00 calc ...
 H(43)  H  0.3275      0.0608      -0.3211     0.1759      Uiso 1.00 calc ...
 H(44)  H  0.2489      0.0691      -0.3324     0.1759      Uiso 1.00 calc ...
 H(45)  H  0.3287      -0.1960     -0.2720     0.1679      Uiso 1.00 calc ...
 H(46)  H  0.3738      -0.0923     -0.2860     0.1679      Uiso 1.00 calc ...
 H(47)  H  0.3742      -0.1217     -0.2167     0.1679      Uiso 1.00 calc ...
 H(48)  H  -0.0322     -0.1330     -0.2101     0.0729      Uiso 1.00 calc ...
 H(49)  H  -0.0296     0.0124      -0.3537     0.1170      Uiso 1.00 calc ...
 H(50)  H  0.0099      -0.0937     -0.3737     0.1170      Uiso 1.00 calc ...
 H(51)  H  -0.0671     -0.1075     -0.3773     0.1170      Uiso 1.00 calc ...
 H(52)  H  0.0504      -0.2609     -0.2606     0.1139      Uiso 1.00 calc ...
 H(53)  H  0.0781      -0.1789     -0.3056     0.1139      Uiso 1.00 calc ...
 H(54)  H  0.0865      -0.1404     -0.2359     0.1139      Uiso 1.00 calc ...

loop_
_atom_site_aniso_label
_atom_site_aniso_U_11
_atom_site_aniso_U_22
_atom_site_aniso_U_33
_atom_site_aniso_U_12
_atom_site_aniso_U_13
_atom_site_aniso_U_23
 Ru(1)  0.0294(3)   0.0252(3)   0.0331(3)   -0.0019(2)  0.0101(2)   -0.0019(2) 
 Ru(2)  0.0312(3)   0.0256(3)   0.0287(3)   0.0000(2)   0.0100(2)   -0.0007(2) 
 Ti(1)  0.0369(7)   0.0364(7)   0.0324(6)   -0.0024(6)  0.0143(5)   -0.0019(6) 
 Ti(2)  0.0412(7)   0.0244(6)   0.0373(7)   -0.0002(6)  0.0140(5)   -0.0008(6) 
 S(1)   0.0396(9)   0.0319(9)   0.0344(9)   -0.0010(8)  0.0094(7)   0.0028(8)  
 S(2)   0.0375(9)   0.0342(10)  0.0371(9)   -0.0079(8)  0.0105(7)   -0.0007(8) 
 S(3)   0.0361(9)   0.0288(9)   0.0368(9)   0.0024(7)   0.0123(7)   -0.0040(7) 
 S(4)   0.0369(9)   0.0293(9)   0.0361(9)   -0.0001(7)  0.0159(7)   -0.0015(7) 
 P(1)   0.059(1)    0.067(2)    0.052(1)    -0.002(1)   0.011(1)    -0.003(1)  
 P(2)   0.062(2)    0.065(2)    0.063(2)    -0.001(1)   0.021(1)    0.008(1)   
 F(1)   0.148(5)    0.180(7)    0.056(3)    -0.028(5)   0.035(3)    -0.004(4)  
 F(2)   0.089(4)    0.187(7)    0.197(7)    0.048(5)    0.043(4)    0.082(6)   
 F(3)   0.181(6)    0.095(5)    0.121(5)    -0.068(5)   0.027(5)    -0.006(4)  
 F(4)   0.153(5)    0.130(5)    0.069(3)    -0.012(4)   0.051(4)    -0.005(4)  
 F(5)   0.096(5)    0.211(8)    0.130(5)    0.066(5)    0.038(4)    0.042(5)   
 F(6)   0.229(8)    0.112(5)    0.098(5)    -0.084(5)   0.004(5)    -0.023(4)  
 F(7)   0.151(7)    0.41(1)     0.102(5)    -0.029(9)   0.020(5)    -0.074(8)  
 F(8)   0.079(5)    0.227(10)   0.35(1)     0.067(6)    -0.013(6)   -0.111(9)  
 F(9)   0.32(1)     0.114(7)    0.54(2)     -0.031(8)   0.29(1)     0.078(10)  
 F(10)  0.214(8)    0.37(1)     0.070(4)    -0.079(9)   0.047(5)    -0.075(6)  
 F(11)  0.093(5)    0.33(1)     0.200(8)    0.086(7)    -0.040(5)   -0.122(8)  
 F(12)  0.49(2)     0.091(6)    0.34(1)     -0.091(9)   0.31(1)     -0.048(7)  
 O(1)   0.088(6)    0.181(10)   0.137(7)    -0.016(6)   0.050(5)    -0.054(7)  
 O(2)   0.091(5)    0.096(5)    0.101(5)    0.042(4)    0.044(4)    0.013(4)   
 N(1)   0.061(6)    0.16(1)     0.082(7)    -0.015(6)   0.038(5)    -0.057(7)  
 N(2)   0.060(4)    0.056(4)    0.050(4)    0.010(4)    0.017(3)    0.004(3)   
 C(1)   0.077(6)    0.075(7)    0.048(5)    0.010(5)    0.040(5)    0.012(5)   
 C(2)   0.065(6)    0.095(8)    0.056(6)    -0.031(6)   0.035(5)    -0.013(5)  
 C(3)   0.049(5)    0.120(9)    0.062(6)    0.026(6)    0.028(4)    0.016(6)   
 C(4)   0.097(7)    0.057(6)    0.070(6)    0.003(5)    0.060(5)    -0.009(5)  
 C(5)   0.064(6)    0.106(8)    0.032(4)    -0.020(6)   0.024(4)    -0.012(5)  
 C(6)   0.066(5)    0.031(4)    0.065(5)    0.009(4)    0.039(4)    -0.009(4)  
 C(7)   0.062(5)    0.034(4)    0.056(5)    -0.001(4)   0.014(4)    -0.011(4)  
 C(8)   0.073(6)    0.025(4)    0.080(6)    -0.010(4)   0.037(5)    -0.006(4)  
 C(9)   0.112(8)    0.030(4)    0.047(5)    0.020(5)    0.020(5)    0.001(4)   
 C(10)  0.057(5)    0.038(5)    0.085(7)    0.016(4)    0.006(5)    -0.015(5)  
 C(11)  0.038(4)    0.031(4)    0.049(4)    -0.009(3)   0.009(3)    -0.002(3)  
 C(12)  0.038(4)    0.037(4)    0.050(4)    -0.014(3)   0.013(3)    -0.010(4)  
 C(13)  0.031(4)    0.046(5)    0.047(4)    -0.013(3)   0.000(3)    -0.001(4)  
 C(14)  0.031(3)    0.032(4)    0.060(5)    -0.005(3)   0.007(3)    -0.007(4)  
 C(15)  0.036(4)    0.036(4)    0.044(4)    -0.010(3)   0.016(3)    -0.007(3)  
 C(16)  0.066(5)    0.034(4)    0.083(6)    -0.006(4)   0.023(4)    0.007(4)   
 C(17)  0.062(5)    0.057(5)    0.080(6)    -0.023(5)   0.024(4)    -0.028(5)  
 C(18)  0.060(5)    0.084(7)    0.044(4)    -0.024(5)   -0.001(4)   0.002(5)   
 C(19)  0.040(4)    0.049(5)    0.114(7)    0.005(4)    0.014(5)    0.009(5)   
 C(20)  0.050(5)    0.076(6)    0.072(6)    -0.018(4)   0.036(4)    -0.014(5)  
 C(21)  0.044(4)    0.048(5)    0.031(4)    0.002(4)    0.008(3)    0.014(3)   
 C(22)  0.043(4)    0.043(4)    0.025(3)    0.011(3)    0.001(3)    0.001(3)   
 C(23)  0.036(4)    0.039(4)    0.033(4)    0.003(3)    0.003(3)    0.003(3)   
 C(24)  0.035(4)    0.047(5)    0.030(4)    0.007(3)    0.005(3)    0.000(3)   
 C(25)  0.047(4)    0.033(4)    0.032(4)    0.005(3)    0.002(3)    0.003(3)   
 C(26)  0.070(6)    0.086(7)    0.051(5)    -0.008(5)   0.028(4)    0.021(5)   
 C(27)  0.094(7)    0.066(6)    0.044(5)    0.022(5)    0.020(4)    -0.013(4)  
 C(28)  0.059(5)    0.059(5)    0.059(5)    -0.013(4)   -0.011(4)   0.004(4)   
 C(29)  0.061(5)    0.081(6)    0.055(5)    0.033(5)    0.028(4)    0.006(5)   
 C(30)  0.083(6)    0.030(4)    0.060(5)    0.008(4)    0.001(4)    0.003(4)   
 C(31)  0.14(1)     0.18(2)     0.12(1)     -0.05(1)    0.05(1)     -0.10(1)   
 C(32)  0.18(1)     0.11(1)     0.13(1)     0.01(1)     -0.004(10)  0.005(9)   
 C(33)  0.123(10)   0.21(2)     0.090(8)    -0.03(1)    0.037(8)    -0.003(10) 
 C(34)  0.070(6)    0.059(6)    0.057(5)    -0.006(5)   0.022(5)    -0.004(4)  
 C(35)  0.133(9)    0.085(8)    0.089(7)    0.043(7)    0.054(7)    0.031(6)   
 C(36)  0.069(6)    0.14(1)     0.072(6)    0.020(7)    0.018(5)    0.008(7)   
#------------------------------------------------------------------------------
_refine_special_details
;
Refinement based on F against all reflections. The weighted R-factor (wR) and
goodness of fit (S) are based on F, conventional R-factors (R) are calculated
on F, with F set to zero for negative F. The threshold expression of
F^2^ > 2sigma(F^2^) is used only for calculating R-factors(gt) etc. thus the
refinement was done using all reflections.  
;

_refine_ls_structure_factor_coef       F
_refine_ls_matrix_type                 full
_refine_ls_weighting_scheme            calc
_refine_ls_weighting_details
   'w = 1/[\s^2^(Fo) + 0.00001|Fo|^2^]'
_refine_ls_hydrogen_treatment          noref
_refine_ls_extinction_method           
   'Zachariasen(1967) type 2 Gaussian isotropic'
_refine_ls_extinction_coef             0.00033(6)
_refine_ls_abs_structure_details       ?
_refine_ls_abs_structure_Flack         ?
_refine_ls_number_reflns               6494
_refine_ls_number_parameters           560
_refine_ls_number_restraints           0
_refine_ls_number_constraints          0
_refine_ls_R_factor_all                0.0460
_refine_ls_R_factor_gt                 0.0460
_refine_ls_wR_factor_all               ?
_refine_ls_wR_factor_ref               0.0355
_refine_ls_wR_factor_gt                0.0355
_refine_ls_goodness_of_fit_all         ?
_refine_ls_goodness_of_fit_ref         1.855
_refine_ls_shift/su_max                0.1890
_refine_ls_shift/su_mean               0.0070
_refine_diff_density_min               -0.60
_refine_diff_density_max               0.79
#------------------------------------------------------------------------------
_geom_special_details
;
 ?
;
loop_
_geom_bond_atom_site_label_1
_geom_bond_atom_site_label_2
_geom_bond_distance
_geom_bond_site_symmetry_1
_geom_bond_site_symmetry_2
_geom_bond_publ_flag
 Ru(1)     Ru(2)     2.8136(8)  1_555 1_555 yes
 Ru(1)     Ti(1)     3.002(1)   1_555 1_555 yes
 Ru(1)     Ti(2)     2.975(1)   1_555 1_555 yes
 Ru(1)     S(1)      2.409(2)   1_555 1_555 yes
 Ru(1)     S(3)      2.339(2)   1_555 1_555 yes
 Ru(1)     S(4)      2.335(2)   1_555 1_555 yes
 Ru(1)     C(11)     2.253(6)   1_555 1_555 yes
 Ru(1)     C(12)     2.257(6)   1_555 1_555 yes
 Ru(1)     C(13)     2.236(6)   1_555 1_555 yes
 Ru(1)     C(14)     2.203(6)   1_555 1_555 yes
 Ru(1)     C(15)     2.248(6)   1_555 1_555 yes
 Ru(2)     Ti(1)     2.964(1)   1_555 1_555 yes
 Ru(2)     Ti(2)     3.003(1)   1_555 1_555 yes
 Ru(2)     S(2)      2.412(2)   1_555 1_555 yes
 Ru(2)     S(3)      2.326(2)   1_555 1_555 yes
 Ru(2)     S(4)      2.337(2)   1_555 1_555 yes
 Ru(2)     C(21)     2.248(6)   1_555 1_555 yes
 Ru(2)     C(22)     2.243(6)   1_555 1_555 yes
 Ru(2)     C(23)     2.257(6)   1_555 1_555 yes
 Ru(2)     C(24)     2.226(6)   1_555 1_555 yes
 Ru(2)     C(25)     2.262(6)   1_555 1_555 yes
 Ti(1)     Ti(2)     3.105(2)   1_555 1_555 yes
 Ti(1)     S(1)      2.323(2)   1_555 1_555 yes
 Ti(1)     S(2)      2.321(2)   1_555 1_555 yes
 Ti(1)     S(3)      2.277(2)   1_555 1_555 yes
 Ti(1)     C(1)      2.318(7)   1_555 1_555 yes
 Ti(1)     C(2)      2.319(8)   1_555 1_555 yes
 Ti(1)     C(3)      2.311(8)   1_555 1_555 yes
 Ti(1)     C(4)      2.312(7)   1_555 1_555 yes
 Ti(1)     C(5)      2.324(7)   1_555 1_555 yes
 Ti(2)     S(1)      2.316(2)   1_555 1_555 yes
 Ti(2)     S(2)      2.321(2)   1_555 1_555 yes
 Ti(2)     S(4)      2.274(2)   1_555 1_555 yes
 Ti(2)     C(6)      2.346(7)   1_555 1_555 yes
 Ti(2)     C(7)      2.319(7)   1_555 1_555 yes
 Ti(2)     C(8)      2.319(7)   1_555 1_555 yes
 Ti(2)     C(9)      2.317(7)   1_555 1_555 yes
 Ti(2)     C(10)     2.338(7)   1_555 1_555 yes
 P(1)      F(1)      1.557(5)   1_555 1_555 yes
 P(1)      F(2)      1.549(6)   1_555 1_555 yes
 P(1)      F(3)      1.542(6)   1_555 1_555 yes
 P(1)      F(4)      1.560(5)   1_555 1_555 yes
 P(1)      F(5)      1.532(5)   1_555 1_555 yes
 P(1)      F(6)      1.541(6)   1_555 1_555 yes
 P(2)      F(7)      1.495(7)   1_555 1_555 yes
 P(2)      F(8)      1.477(6)   1_555 1_555 yes
 P(2)      F(9)      1.441(8)   1_555 1_555 yes
 P(2)      F(10)     1.463(6)   1_555 1_555 yes
 P(2)      F(11)     1.479(6)   1_555 1_555 yes
 P(2)      F(12)     1.464(7)   1_555 1_555 yes
 O(1)      C(31)     1.16(1)    1_555 1_555 yes
 O(2)      C(34)     1.199(9)   1_555 1_555 yes
 N(1)      C(31)     1.32(1)    1_555 1_555 yes
 N(1)      C(32)     1.40(1)    1_555 1_555 yes
 N(1)      C(33)     1.41(1)    1_555 1_555 yes
 N(2)      C(34)     1.329(9)   1_555 1_555 yes
 N(2)      C(35)     1.446(9)   1_555 1_555 yes
 N(2)      C(36)     1.447(9)   1_555 1_555 yes
 C(1)      C(2)      1.35(1)    1_555 1_555 yes
 C(1)      C(5)      1.37(1)    1_555 1_555 yes
 C(2)      C(3)      1.39(1)    1_555 1_555 yes
 C(3)      C(4)      1.42(1)    1_555 1_555 yes
 C(4)      C(5)      1.38(1)    1_555 1_555 yes
 C(6)      C(7)      1.380(9)   1_555 1_555 yes
 C(6)      C(10)     1.388(10)  1_555 1_555 yes
 C(7)      C(8)      1.405(9)   1_555 1_555 yes
 C(8)      C(9)      1.378(10)  1_555 1_555 yes
 C(9)      C(10)     1.42(1)    1_555 1_555 yes
 C(11)     C(12)     1.425(9)   1_555 1_555 yes
 C(11)     C(15)     1.420(8)   1_555 1_555 yes
 C(11)     C(16)     1.498(9)   1_555 1_555 yes
 C(12)     C(13)     1.408(9)   1_555 1_555 yes
 C(12)     C(17)     1.508(9)   1_555 1_555 yes
 C(13)     C(14)     1.419(9)   1_555 1_555 yes
 C(13)     C(18)     1.513(9)   1_555 1_555 yes
 C(14)     C(15)     1.415(8)   1_555 1_555 yes
 C(14)     C(19)     1.499(9)   1_555 1_555 yes
 C(15)     C(20)     1.488(9)   1_555 1_555 yes
 C(21)     C(22)     1.441(9)   1_555 1_555 yes
 C(21)     C(25)     1.419(9)   1_555 1_555 yes
 C(21)     C(26)     1.505(9)   1_555 1_555 yes
 C(22)     C(23)     1.429(8)   1_555 1_555 yes
 C(22)     C(27)     1.494(9)   1_555 1_555 yes
 C(23)     C(24)     1.413(8)   1_555 1_555 yes
 C(23)     C(28)     1.500(9)   1_555 1_555 yes
 C(24)     C(25)     1.428(9)   1_555 1_555 yes
 C(24)     C(29)     1.505(9)   1_555 1_555 yes
 C(25)     C(30)     1.508(9)   1_555 1_555 yes
#------------------------------------------------------------------------------
loop_
_geom_angle_atom_site_label_1
_geom_angle_atom_site_label_2
_geom_angle_atom_site_label_3
_geom_angle
_geom_angle_site_symmetry_1
_geom_angle_site_symmetry_2
_geom_angle_site_symmetry_3
_geom_angle_publ_flag
   Ru(2)     Ru(1)     Ti(1)     61.18(3)   1_555 1_555 1_555 yes
   Ru(2)     Ru(1)     Ti(2)     62.42(3)   1_555 1_555 1_555 yes
   Ru(2)     Ru(1)     S(1)      96.91(4)   1_555 1_555 1_555 yes
   Ru(2)     Ru(1)     S(3)      52.70(4)   1_555 1_555 1_555 yes
   Ru(2)     Ru(1)     S(4)      52.99(4)   1_555 1_555 1_555 yes
   Ru(2)     Ru(1)     C(11)     113.6(2)   1_555 1_555 1_555 yes
   Ru(2)     Ru(1)     C(12)     132.8(2)   1_555 1_555 1_555 yes
   Ru(2)     Ru(1)     C(13)     168.2(2)   1_555 1_555 1_555 yes
   Ru(2)     Ru(1)     C(14)     152.0(2)   1_555 1_555 1_555 yes
   Ru(2)     Ru(1)     C(15)     121.7(2)   1_555 1_555 1_555 yes
   Ti(1)     Ru(1)     Ti(2)     62.60(3)   1_555 1_555 1_555 yes
   Ti(1)     Ru(1)     S(1)      49.35(5)   1_555 1_555 1_555 yes
   Ti(1)     Ru(1)     S(3)      48.53(5)   1_555 1_555 1_555 yes
   Ti(1)     Ru(1)     S(4)      99.13(5)   1_555 1_555 1_555 yes
   Ti(1)     Ru(1)     C(11)     138.9(2)   1_555 1_555 1_555 yes
   Ti(1)     Ru(1)     C(12)     113.3(2)   1_555 1_555 1_555 yes
   Ti(1)     Ru(1)     C(13)     114.9(2)   1_555 1_555 1_555 yes
   Ti(1)     Ru(1)     C(14)     142.0(2)   1_555 1_555 1_555 yes
   Ti(1)     Ru(1)     C(15)     174.8(2)   1_555 1_555 1_555 yes
   Ti(2)     Ru(1)     S(1)      49.60(4)   1_555 1_555 1_555 yes
   Ti(2)     Ru(1)     S(3)      100.03(5)  1_555 1_555 1_555 yes
   Ti(2)     Ru(1)     S(4)      48.92(5)   1_555 1_555 1_555 yes
   Ti(2)     Ru(1)     C(11)     155.8(2)   1_555 1_555 1_555 yes
   Ti(2)     Ru(1)     C(12)     162.1(2)   1_555 1_555 1_555 yes
   Ti(2)     Ru(1)     C(13)     127.1(2)   1_555 1_555 1_555 yes
   Ti(2)     Ru(1)     C(14)     109.3(2)   1_555 1_555 1_555 yes
   Ti(2)     Ru(1)     C(15)     122.3(2)   1_555 1_555 1_555 yes
   S(1)      Ru(1)     S(3)      96.77(6)   1_555 1_555 1_555 yes
   S(1)      Ru(1)     S(4)      97.79(6)   1_555 1_555 1_555 yes
   S(1)      Ru(1)     C(11)     147.9(2)   1_555 1_555 1_555 yes
   S(1)      Ru(1)     C(12)     113.6(2)   1_555 1_555 1_555 yes
   S(1)      Ru(1)     C(13)     87.0(2)    1_555 1_555 1_555 yes
   S(1)      Ru(1)     C(14)     95.7(2)    1_555 1_555 1_555 yes
   S(1)      Ru(1)     C(15)     131.7(2)   1_555 1_555 1_555 yes
   S(3)      Ru(1)     S(4)      105.35(6)  1_555 1_555 1_555 yes
   S(3)      Ru(1)     C(11)     94.1(2)    1_555 1_555 1_555 yes
   S(3)      Ru(1)     C(12)     87.3(2)    1_555 1_555 1_555 yes
   S(3)      Ru(1)     C(13)     115.8(2)   1_555 1_555 1_555 yes
   S(3)      Ru(1)     C(14)     149.4(2)   1_555 1_555 1_555 yes
   S(3)      Ru(1)     C(15)     128.9(2)   1_555 1_555 1_555 yes
   S(4)      Ru(1)     C(11)     108.3(2)   1_555 1_555 1_555 yes
   S(4)      Ru(1)     C(12)     144.7(2)   1_555 1_555 1_555 yes
   S(4)      Ru(1)     C(13)     137.7(2)   1_555 1_555 1_555 yes
   S(4)      Ru(1)     C(14)     100.5(2)   1_555 1_555 1_555 yes
   S(4)      Ru(1)     C(15)     85.8(2)    1_555 1_555 1_555 yes
   C(11)     Ru(1)     C(12)     36.8(2)    1_555 1_555 1_555 yes
   C(11)     Ru(1)     C(13)     61.1(2)    1_555 1_555 1_555 yes
   C(11)     Ru(1)     C(14)     61.9(2)    1_555 1_555 1_555 yes
   C(11)     Ru(1)     C(15)     36.8(2)    1_555 1_555 1_555 yes
   C(12)     Ru(1)     C(13)     36.5(2)    1_555 1_555 1_555 yes
   C(12)     Ru(1)     C(14)     62.1(2)    1_555 1_555 1_555 yes
   C(12)     Ru(1)     C(15)     61.5(2)    1_555 1_555 1_555 yes
   C(13)     Ru(1)     C(14)     37.3(2)    1_555 1_555 1_555 yes
   C(13)     Ru(1)     C(15)     61.3(2)    1_555 1_555 1_555 yes
   C(14)     Ru(1)     C(15)     37.1(2)    1_555 1_555 1_555 yes
   Ru(1)     Ru(2)     Ti(1)     62.56(3)   1_555 1_555 1_555 yes
   Ru(1)     Ru(2)     Ti(2)     61.42(3)   1_555 1_555 1_555 yes
   Ru(1)     Ru(2)     S(2)      97.21(4)   1_555 1_555 1_555 yes
   Ru(1)     Ru(2)     S(3)      53.11(4)   1_555 1_555 1_555 yes
   Ru(1)     Ru(2)     S(4)      52.94(4)   1_555 1_555 1_555 yes
   Ru(1)     Ru(2)     C(21)     115.0(2)   1_555 1_555 1_555 yes
   Ru(1)     Ru(2)     C(22)     139.2(2)   1_555 1_555 1_555 yes
   Ru(1)     Ru(2)     C(23)     176.1(2)   1_555 1_555 1_555 yes
   Ru(1)     Ru(2)     C(24)     144.2(2)   1_555 1_555 1_555 yes
   Ru(1)     Ru(2)     C(25)     117.2(2)   1_555 1_555 1_555 yes
   Ti(1)     Ru(2)     Ti(2)     62.72(3)   1_555 1_555 1_555 yes
   Ti(1)     Ru(2)     S(2)      49.87(4)   1_555 1_555 1_555 yes
   Ti(1)     Ru(2)     S(3)      49.19(5)   1_555 1_555 1_555 yes
   Ti(1)     Ru(2)     S(4)      100.17(5)  1_555 1_555 1_555 yes
   Ti(1)     Ru(2)     C(21)     163.0(2)   1_555 1_555 1_555 yes
   Ti(1)     Ru(2)     C(22)     154.2(2)   1_555 1_555 1_555 yes
   Ti(1)     Ru(2)     C(23)     121.3(2)   1_555 1_555 1_555 yes
   Ti(1)     Ru(2)     C(24)     109.4(2)   1_555 1_555 1_555 yes
   Ti(1)     Ru(2)     C(25)     127.5(2)   1_555 1_555 1_555 yes
   Ti(2)     Ru(2)     S(2)      49.29(5)   1_555 1_555 1_555 yes
   Ti(2)     Ru(2)     S(3)      99.54(5)   1_555 1_555 1_555 yes
   Ti(2)     Ru(2)     S(4)      48.48(5)   1_555 1_555 1_555 yes
   Ti(2)     Ru(2)     C(21)     132.5(2)   1_555 1_555 1_555 yes
   Ti(2)     Ru(2)     C(22)     111.1(2)   1_555 1_555 1_555 yes
   Ti(2)     Ru(2)     C(23)     119.3(2)   1_555 1_555 1_555 yes
   Ti(2)     Ru(2)     C(24)     149.7(2)   1_555 1_555 1_555 yes
   Ti(2)     Ru(2)     C(25)     168.8(2)   1_555 1_555 1_555 yes
   S(2)      Ru(2)     S(3)      98.31(6)   1_555 1_555 1_555 yes
   S(2)      Ru(2)     S(4)      96.59(6)   1_555 1_555 1_555 yes
   S(2)      Ru(2)     C(21)     143.2(2)   1_555 1_555 1_555 yes
   S(2)      Ru(2)     C(22)     106.0(2)   1_555 1_555 1_555 yes
   S(2)      Ru(2)     C(23)     85.6(2)    1_555 1_555 1_555 yes
   S(2)      Ru(2)     C(24)     102.1(2)   1_555 1_555 1_555 yes
   S(2)      Ru(2)     C(25)     139.2(2)   1_555 1_555 1_555 yes
   S(3)      Ru(2)     S(4)      105.70(6)  1_555 1_555 1_555 yes
   S(3)      Ru(2)     C(21)     114.9(2)   1_555 1_555 1_555 yes
   S(3)      Ru(2)     C(22)     148.8(2)   1_555 1_555 1_555 yes
   S(3)      Ru(2)     C(23)     129.2(2)   1_555 1_555 1_555 yes
   S(3)      Ru(2)     C(24)     94.1(2)    1_555 1_555 1_555 yes
   S(3)      Ru(2)     C(25)     86.8(2)    1_555 1_555 1_555 yes
   S(4)      Ru(2)     C(21)     89.6(2)    1_555 1_555 1_555 yes
   S(4)      Ru(2)     C(22)     90.8(2)    1_555 1_555 1_555 yes
   S(4)      Ru(2)     C(23)     124.2(2)   1_555 1_555 1_555 yes
   S(4)      Ru(2)     C(24)     150.4(2)   1_555 1_555 1_555 yes
   S(4)      Ru(2)     C(25)     121.0(2)   1_555 1_555 1_555 yes
   C(21)     Ru(2)     C(22)     37.4(2)    1_555 1_555 1_555 yes
   C(21)     Ru(2)     C(23)     61.5(2)    1_555 1_555 1_555 yes
   C(21)     Ru(2)     C(24)     61.8(2)    1_555 1_555 1_555 yes
   C(21)     Ru(2)     C(25)     36.7(2)    1_555 1_555 1_555 yes
   C(22)     Ru(2)     C(23)     37.0(2)    1_555 1_555 1_555 yes
   C(22)     Ru(2)     C(24)     62.2(2)    1_555 1_555 1_555 yes
   C(22)     Ru(2)     C(25)     62.0(2)    1_555 1_555 1_555 yes
   C(23)     Ru(2)     C(24)     36.7(2)    1_555 1_555 1_555 yes
   C(23)     Ru(2)     C(25)     61.3(2)    1_555 1_555 1_555 yes
   C(24)     Ru(2)     C(25)     37.1(2)    1_555 1_555 1_555 yes
   Ru(1)     Ti(1)     Ru(2)     56.27(2)   1_555 1_555 1_555 yes
   Ru(1)     Ti(1)     Ti(2)     58.26(3)   1_555 1_555 1_555 yes
   Ru(1)     Ti(1)     S(1)      51.90(5)   1_555 1_555 1_555 yes
   Ru(1)     Ti(1)     S(2)      94.27(5)   1_555 1_555 1_555 yes
   Ru(1)     Ti(1)     S(3)      50.33(5)   1_555 1_555 1_555 yes
   Ru(1)     Ti(1)     C(1)      139.5(2)   1_555 1_555 1_555 yes
   Ru(1)     Ti(1)     C(2)      172.9(3)   1_555 1_555 1_555 yes
   Ru(1)     Ti(1)     C(3)      150.4(3)   1_555 1_555 1_555 yes
   Ru(1)     Ti(1)     C(4)      123.1(2)   1_555 1_555 1_555 yes
   Ru(1)     Ti(1)     C(5)      119.2(2)   1_555 1_555 1_555 yes
   Ru(2)     Ti(1)     Ti(2)     59.25(3)   1_555 1_555 1_555 yes
   Ru(2)     Ti(1)     S(1)      94.88(5)   1_555 1_555 1_555 yes
   Ru(2)     Ti(1)     S(2)      52.62(5)   1_555 1_555 1_555 yes
   Ru(2)     Ti(1)     S(3)      50.65(5)   1_555 1_555 1_555 yes
   Ru(2)     Ti(1)     C(1)      159.7(2)   1_555 1_555 1_555 yes
   Ru(2)     Ti(1)     C(2)      129.2(2)   1_555 1_555 1_555 yes
   Ru(2)     Ti(1)     C(3)      116.2(2)   1_555 1_555 1_555 yes
   Ru(2)     Ti(1)     C(4)      130.9(2)   1_555 1_555 1_555 yes
   Ru(2)     Ti(1)     C(5)      162.9(3)   1_555 1_555 1_555 yes
   Ti(2)     Ti(1)     S(1)      47.88(5)   1_555 1_555 1_555 yes
   Ti(2)     Ti(1)     S(2)      48.01(5)   1_555 1_555 1_555 yes
   Ti(2)     Ti(1)     S(3)      97.78(6)   1_555 1_555 1_555 yes
   Ti(2)     Ti(1)     C(1)      114.0(2)   1_555 1_555 1_555 yes
   Ti(2)     Ti(1)     C(2)      119.1(2)   1_555 1_555 1_555 yes
   Ti(2)     Ti(1)     C(3)      147.3(3)   1_555 1_555 1_555 yes
   Ti(2)     Ti(1)     C(4)      169.6(3)   1_555 1_555 1_555 yes
   Ti(2)     Ti(1)     C(5)      135.0(3)   1_555 1_555 1_555 yes
   S(1)      Ti(1)     S(2)      94.39(7)   1_555 1_555 1_555 yes
   S(1)      Ti(1)     S(3)      101.04(7)  1_555 1_555 1_555 yes
   S(1)      Ti(1)     C(1)      92.0(2)    1_555 1_555 1_555 yes
   S(1)      Ti(1)     C(2)      121.1(3)   1_555 1_555 1_555 yes
   S(1)      Ti(1)     C(3)      148.7(2)   1_555 1_555 1_555 yes
   S(1)      Ti(1)     C(4)      123.5(3)   1_555 1_555 1_555 yes
   S(1)      Ti(1)     C(5)      92.9(2)    1_555 1_555 1_555 yes
   S(2)      Ti(1)     S(3)      102.47(7)  1_555 1_555 1_555 yes
   S(2)      Ti(1)     C(1)      107.8(2)   1_555 1_555 1_555 yes
   S(2)      Ti(1)     C(2)      87.5(2)    1_555 1_555 1_555 yes
   S(2)      Ti(1)     C(3)      101.7(3)   1_555 1_555 1_555 yes
   S(2)      Ti(1)     C(4)      137.5(3)   1_555 1_555 1_555 yes
   S(2)      Ti(1)     C(5)      141.7(2)   1_555 1_555 1_555 yes
   S(3)      Ti(1)     C(1)      145.9(2)   1_555 1_555 1_555 yes
   S(3)      Ti(1)     C(2)      135.9(3)   1_555 1_555 1_555 yes
   S(3)      Ti(1)     C(3)      101.4(3)   1_555 1_555 1_555 yes
   S(3)      Ti(1)     C(4)      89.4(2)    1_555 1_555 1_555 yes
   S(3)      Ti(1)     C(5)      112.9(3)   1_555 1_555 1_555 yes
   C(1)      Ti(1)     C(2)      33.9(3)    1_555 1_555 1_555 yes
   C(1)      Ti(1)     C(3)      57.7(3)    1_555 1_555 1_555 yes
   C(1)      Ti(1)     C(4)      57.6(3)    1_555 1_555 1_555 yes
   C(1)      Ti(1)     C(5)      34.4(3)    1_555 1_555 1_555 yes
   C(2)      Ti(1)     C(3)      34.8(3)    1_555 1_555 1_555 yes
   C(2)      Ti(1)     C(4)      58.0(3)    1_555 1_555 1_555 yes
   C(2)      Ti(1)     C(5)      57.1(3)    1_555 1_555 1_555 yes
   C(3)      Ti(1)     C(4)      35.9(3)    1_555 1_555 1_555 yes
   C(3)      Ti(1)     C(5)      58.3(3)    1_555 1_555 1_555 yes
   C(4)      Ti(1)     C(5)      34.6(3)    1_555 1_555 1_555 yes
   Ru(1)     Ti(2)     Ru(2)     56.16(3)   1_555 1_555 1_555 yes
   Ru(1)     Ti(2)     Ti(1)     59.14(3)   1_555 1_555 1_555 yes
   Ru(1)     Ti(2)     S(1)      52.39(5)   1_555 1_555 1_555 yes
   Ru(1)     Ti(2)     S(2)      95.01(5)   1_555 1_555 1_555 yes
   Ru(1)     Ti(2)     S(4)      50.70(5)   1_555 1_555 1_555 yes
   Ru(1)     Ti(2)     C(6)      124.8(2)   1_555 1_555 1_555 yes
   Ru(1)     Ti(2)     C(7)      154.2(2)   1_555 1_555 1_555 yes
   Ru(1)     Ti(2)     C(8)      166.5(2)   1_555 1_555 1_555 yes
   Ru(1)     Ti(2)     C(9)      133.0(2)   1_555 1_555 1_555 yes
   Ru(1)     Ti(2)     C(10)     115.0(2)   1_555 1_555 1_555 yes
   Ru(2)     Ti(2)     Ti(1)     58.03(3)   1_555 1_555 1_555 yes
   Ru(2)     Ti(2)     S(1)      94.01(5)   1_555 1_555 1_555 yes
   Ru(2)     Ti(2)     S(2)      51.99(5)   1_555 1_555 1_555 yes
   Ru(2)     Ti(2)     S(4)      50.28(5)   1_555 1_555 1_555 yes
   Ru(2)     Ti(2)     C(6)      128.5(2)   1_555 1_555 1_555 yes
   Ru(2)     Ti(2)     C(7)      118.9(2)   1_555 1_555 1_555 yes
   Ru(2)     Ti(2)     C(8)      134.8(2)   1_555 1_555 1_555 yes
   Ru(2)     Ti(2)     C(9)      166.7(3)   1_555 1_555 1_555 yes
   Ru(2)     Ti(2)     C(10)     156.5(2)   1_555 1_555 1_555 yes
   Ti(1)     Ti(2)     S(1)      48.07(5)   1_555 1_555 1_555 yes
   Ti(1)     Ti(2)     S(2)      48.02(5)   1_555 1_555 1_555 yes
   Ti(1)     Ti(2)     S(4)      97.63(6)   1_555 1_555 1_555 yes
   Ti(1)     Ti(2)     C(6)      173.3(2)   1_555 1_555 1_555 yes
   Ti(1)     Ti(2)     C(7)      143.7(2)   1_555 1_555 1_555 yes
   Ti(1)     Ti(2)     C(8)      117.1(2)   1_555 1_555 1_555 yes
   Ti(1)     Ti(2)     C(9)      115.6(2)   1_555 1_555 1_555 yes
   Ti(1)     Ti(2)     C(10)     140.1(2)   1_555 1_555 1_555 yes
   S(1)      Ti(2)     S(2)      94.58(7)   1_555 1_555 1_555 yes
   S(1)      Ti(2)     S(4)      102.30(7)  1_555 1_555 1_555 yes
   S(1)      Ti(2)     C(6)      128.5(2)   1_555 1_555 1_555 yes
   S(1)      Ti(2)     C(7)      146.0(2)   1_555 1_555 1_555 yes
   S(1)      Ti(2)     C(8)      114.7(2)   1_555 1_555 1_555 yes
   S(1)      Ti(2)     C(9)      88.0(2)    1_555 1_555 1_555 yes
   S(1)      Ti(2)     C(10)     95.2(2)    1_555 1_555 1_555 yes
   S(2)      Ti(2)     S(4)      101.00(7)  1_555 1_555 1_555 yes
   S(2)      Ti(2)     C(6)      132.8(2)   1_555 1_555 1_555 yes
   S(2)      Ti(2)     C(7)      99.3(2)    1_555 1_555 1_555 yes
   S(2)      Ti(2)     C(8)      89.9(2)    1_555 1_555 1_555 yes
   S(2)      Ti(2)     C(9)      114.7(3)   1_555 1_555 1_555 yes
   S(2)      Ti(2)     C(10)     148.0(2)   1_555 1_555 1_555 yes
   S(4)      Ti(2)     C(6)      88.7(2)    1_555 1_555 1_555 yes
   S(4)      Ti(2)     C(7)      105.2(2)   1_555 1_555 1_555 yes
   S(4)      Ti(2)     C(8)      140.4(2)   1_555 1_555 1_555 yes
   S(4)      Ti(2)     C(9)      142.0(2)   1_555 1_555 1_555 yes
   S(4)      Ti(2)     C(10)     106.5(2)   1_555 1_555 1_555 yes
   C(6)      Ti(2)     C(7)      34.4(2)    1_555 1_555 1_555 yes
   C(6)      Ti(2)     C(8)      57.7(3)    1_555 1_555 1_555 yes
   C(6)      Ti(2)     C(9)      57.7(3)    1_555 1_555 1_555 yes
   C(6)      Ti(2)     C(10)     34.5(2)    1_555 1_555 1_555 yes
   C(7)      Ti(2)     C(8)      35.3(2)    1_555 1_555 1_555 yes
   C(7)      Ti(2)     C(9)      58.0(2)    1_555 1_555 1_555 yes
   C(7)      Ti(2)     C(10)     58.0(2)    1_555 1_555 1_555 yes
   C(8)      Ti(2)     C(9)      34.6(2)    1_555 1_555 1_555 yes
   C(8)      Ti(2)     C(10)     58.4(3)    1_555 1_555 1_555 yes
   C(9)      Ti(2)     C(10)     35.5(3)    1_555 1_555 1_555 yes
   Ru(1)     S(1)      Ti(1)     78.75(6)   1_555 1_555 1_555 yes
   Ru(1)     S(1)      Ti(2)     78.01(6)   1_555 1_555 1_555 yes
   Ti(1)     S(1)      Ti(2)     84.05(6)   1_555 1_555 1_555 yes
   Ru(2)     S(2)      Ti(1)     77.51(6)   1_555 1_555 1_555 yes
   Ru(2)     S(2)      Ti(2)     78.72(6)   1_555 1_555 1_555 yes
   Ti(1)     S(2)      Ti(2)     83.98(6)   1_555 1_555 1_555 yes
   Ru(1)     S(3)      Ru(2)     74.19(5)   1_555 1_555 1_555 yes
   Ru(1)     S(3)      Ti(1)     81.14(6)   1_555 1_555 1_555 yes
   Ru(2)     S(3)      Ti(1)     80.16(6)   1_555 1_555 1_555 yes
   Ru(1)     S(4)      Ru(2)     74.07(5)   1_555 1_555 1_555 yes
   Ru(1)     S(4)      Ti(2)     80.37(6)   1_555 1_555 1_555 yes
   Ru(2)     S(4)      Ti(2)     81.25(6)   1_555 1_555 1_555 yes
   F(1)      P(1)      F(2)      88.8(3)    1_555 1_555 1_555 yes
   F(1)      P(1)      F(3)      89.3(3)    1_555 1_555 1_555 yes
   F(1)      P(1)      F(4)      179.3(4)   1_555 1_555 1_555 yes
   F(1)      P(1)      F(5)      91.5(3)    1_555 1_555 1_555 yes
   F(1)      P(1)      F(6)      91.1(3)    1_555 1_555 1_555 yes
   F(2)      P(1)      F(3)      89.2(4)    1_555 1_555 1_555 yes
   F(2)      P(1)      F(4)      90.8(3)    1_555 1_555 1_555 yes
   F(2)      P(1)      F(5)      179.3(4)   1_555 1_555 1_555 yes
   F(2)      P(1)      F(6)      88.8(4)    1_555 1_555 1_555 yes
   F(3)      P(1)      F(4)      91.3(3)    1_555 1_555 1_555 yes
   F(3)      P(1)      F(5)      90.2(4)    1_555 1_555 1_555 yes
   F(3)      P(1)      F(6)      178.0(4)   1_555 1_555 1_555 yes
   F(4)      P(1)      F(5)      88.9(3)    1_555 1_555 1_555 yes
   F(4)      P(1)      F(6)      88.3(3)    1_555 1_555 1_555 yes
   F(5)      P(1)      F(6)      91.8(4)    1_555 1_555 1_555 yes
   F(7)      P(2)      F(8)      94.9(4)    1_555 1_555 1_555 yes
   F(7)      P(2)      F(9)      97.8(6)    1_555 1_555 1_555 yes
   F(7)      P(2)      F(10)     173.3(6)   1_555 1_555 1_555 yes
   F(7)      P(2)      F(11)     83.6(4)    1_555 1_555 1_555 yes
   F(7)      P(2)      F(12)     83.6(5)    1_555 1_555 1_555 yes
   F(8)      P(2)      F(9)      90.3(5)    1_555 1_555 1_555 yes
   F(8)      P(2)      F(10)     88.3(5)    1_555 1_555 1_555 yes
   F(8)      P(2)      F(11)     175.0(6)   1_555 1_555 1_555 yes
   F(8)      P(2)      F(12)     86.5(6)    1_555 1_555 1_555 yes
   F(9)      P(2)      F(10)     88.0(6)    1_555 1_555 1_555 yes
   F(9)      P(2)      F(11)     85.2(5)    1_555 1_555 1_555 yes
   F(9)      P(2)      F(12)     176.6(6)   1_555 1_555 1_555 yes
   F(10)     P(2)      F(11)     93.6(4)    1_555 1_555 1_555 yes
   F(10)     P(2)      F(12)     90.7(5)    1_555 1_555 1_555 yes
   F(11)     P(2)      F(12)     98.0(6)    1_555 1_555 1_555 yes
   C(31)     N(1)      C(32)     125(1)     1_555 1_555 1_555 yes
   C(31)     N(1)      C(33)     117(1)     1_555 1_555 1_555 yes
   C(32)     N(1)      C(33)     116(1)     1_555 1_555 1_555 yes
   C(34)     N(2)      C(35)     122.1(7)   1_555 1_555 1_555 yes
   C(34)     N(2)      C(36)     123.7(7)   1_555 1_555 1_555 yes
   C(35)     N(2)      C(36)     114.1(7)   1_555 1_555 1_555 yes
   Ti(1)     C(1)      C(2)      73.1(5)    1_555 1_555 1_555 yes
   Ti(1)     C(1)      C(5)      73.1(5)    1_555 1_555 1_555 yes
   Ti(1)     C(1)      H(1)      120.1(5)   1_555 1_555 1_555 no
   C(2)      C(1)      C(5)      109.0(8)   1_555 1_555 1_555 yes
   C(2)      C(1)      H(1)      125(1)     1_555 1_555 1_555 no
   C(5)      C(1)      H(1)      125(1)     1_555 1_555 1_555 no
   Ti(1)     C(2)      C(1)      73.0(5)    1_555 1_555 1_555 yes
   Ti(1)     C(2)      C(3)      72.3(5)    1_555 1_555 1_555 yes
   Ti(1)     C(2)      H(2)      121.1(6)   1_555 1_555 1_555 no
   C(1)      C(2)      C(3)      109.3(8)   1_555 1_555 1_555 yes
   C(1)      C(2)      H(2)      125(1)     1_555 1_555 1_555 no
   C(3)      C(2)      H(2)      125(1)     1_555 1_555 1_555 no
   Ti(1)     C(3)      C(2)      72.9(5)    1_555 1_555 1_555 yes
   Ti(1)     C(3)      C(4)      72.1(4)    1_555 1_555 1_555 yes
   Ti(1)     C(3)      H(3)      120.0(6)   1_555 1_555 1_555 no
   C(2)      C(3)      C(4)      106.1(8)   1_555 1_555 1_555 yes
   C(2)      C(3)      H(3)      126(1)     1_555 1_555 1_555 no
   C(4)      C(3)      H(3)      126(1)     1_555 1_555 1_555 no
   Ti(1)     C(4)      C(3)      72.0(4)    1_555 1_555 1_555 yes
   Ti(1)     C(4)      C(5)      73.2(5)    1_555 1_555 1_555 yes
   Ti(1)     C(4)      H(4)      120.3(6)   1_555 1_555 1_555 no
   C(3)      C(4)      C(5)      107.2(8)   1_555 1_555 1_555 yes
   C(3)      C(4)      H(4)      126(1)     1_555 1_555 1_555 no
   C(5)      C(4)      H(4)      126(1)     1_555 1_555 1_555 no
   Ti(1)     C(5)      C(1)      72.6(4)    1_555 1_555 1_555 yes
   Ti(1)     C(5)      C(4)      72.3(4)    1_555 1_555 1_555 yes
   Ti(1)     C(5)      H(5)      121.1(6)   1_555 1_555 1_555 no
   C(1)      C(5)      C(4)      108.4(7)   1_555 1_555 1_555 yes
   C(1)      C(5)      H(5)      125(1)     1_555 1_555 1_555 no
   C(4)      C(5)      H(5)      125(1)     1_555 1_555 1_555 no
   Ti(2)     C(6)      C(7)      71.7(4)    1_555 1_555 1_555 yes
   Ti(2)     C(6)      C(10)     72.4(4)    1_555 1_555 1_555 yes
   Ti(2)     C(6)      H(6)      122.1(5)   1_555 1_555 1_555 no
   C(7)      C(6)      C(10)     109.3(7)   1_555 1_555 1_555 yes
   C(7)      C(6)      H(6)      125.3(8)   1_555 1_555 1_555 no
   C(10)     C(6)      H(6)      125.3(9)   1_555 1_555 1_555 no
   Ti(2)     C(7)      C(6)      73.9(4)    1_555 1_555 1_555 yes
   Ti(2)     C(7)      C(8)      72.4(4)    1_555 1_555 1_555 yes
   Ti(2)     C(7)      H(7)      119.6(5)   1_555 1_555 1_555 no
   C(6)      C(7)      C(8)      107.9(7)   1_555 1_555 1_555 yes
   C(6)      C(7)      H(7)      126.1(9)   1_555 1_555 1_555 no
   C(8)      C(7)      H(7)      126.0(8)   1_555 1_555 1_555 no
   Ti(2)     C(8)      C(7)      72.4(4)    1_555 1_555 1_555 yes
   Ti(2)     C(8)      C(9)      72.6(4)    1_555 1_555 1_555 yes
   Ti(2)     C(8)      H(8)      120.7(5)   1_555 1_555 1_555 no
   C(7)      C(8)      C(9)      107.8(7)   1_555 1_555 1_555 yes
   C(7)      C(8)      H(8)      126.1(9)   1_555 1_555 1_555 no
   C(9)      C(8)      H(8)      126.1(9)   1_555 1_555 1_555 no
   Ti(2)     C(9)      C(8)      72.8(4)    1_555 1_555 1_555 yes
   Ti(2)     C(9)      C(10)     73.0(4)    1_555 1_555 1_555 yes
   Ti(2)     C(9)      H(9)      120.2(5)   1_555 1_555 1_555 no
   C(8)      C(9)      C(10)     108.5(7)   1_555 1_555 1_555 yes
   C(8)      C(9)      H(9)      125(1)     1_555 1_555 1_555 no
   C(10)     C(9)      H(9)      125.8(10)  1_555 1_555 1_555 no
   Ti(2)     C(10)     C(6)      73.1(4)    1_555 1_555 1_555 yes
   Ti(2)     C(10)     C(9)      71.4(4)    1_555 1_555 1_555 yes
   Ti(2)     C(10)     H(10)     120.6(6)   1_555 1_555 1_555 no
   C(6)      C(10)     C(9)      106.5(7)   1_555 1_555 1_555 yes
   C(6)      C(10)     H(10)     126.8(10)  1_555 1_555 1_555 no
   C(9)      C(10)     H(10)     126.8(10)  1_555 1_555 1_555 no
   Ru(1)     C(11)     C(12)     71.8(4)    1_555 1_555 1_555 yes
   Ru(1)     C(11)     C(15)     71.4(4)    1_555 1_555 1_555 yes
   Ru(1)     C(11)     C(16)     128.6(5)   1_555 1_555 1_555 yes
   C(12)     C(11)     C(15)     108.2(6)   1_555 1_555 1_555 yes
   C(12)     C(11)     C(16)     125.1(7)   1_555 1_555 1_555 yes
   C(15)     C(11)     C(16)     126.3(7)   1_555 1_555 1_555 yes
   Ru(1)     C(12)     C(11)     71.4(4)    1_555 1_555 1_555 yes
   Ru(1)     C(12)     C(13)     70.9(4)    1_555 1_555 1_555 yes
   Ru(1)     C(12)     C(17)     128.3(5)   1_555 1_555 1_555 yes
   C(11)     C(12)     C(13)     107.3(6)   1_555 1_555 1_555 yes
   C(11)     C(12)     C(17)     124.8(7)   1_555 1_555 1_555 yes
   C(13)     C(12)     C(17)     127.5(7)   1_555 1_555 1_555 yes
   Ru(1)     C(13)     C(12)     72.6(4)    1_555 1_555 1_555 yes
   Ru(1)     C(13)     C(14)     70.1(4)    1_555 1_555 1_555 yes
   Ru(1)     C(13)     C(18)     127.1(5)   1_555 1_555 1_555 yes
   C(12)     C(13)     C(14)     108.9(6)   1_555 1_555 1_555 yes
   C(12)     C(13)     C(18)     124.4(7)   1_555 1_555 1_555 yes
   C(14)     C(13)     C(18)     126.6(7)   1_555 1_555 1_555 yes
   Ru(1)     C(14)     C(13)     72.6(4)    1_555 1_555 1_555 yes
   Ru(1)     C(14)     C(15)     73.2(4)    1_555 1_555 1_555 yes
   Ru(1)     C(14)     C(19)     126.3(5)   1_555 1_555 1_555 yes
   C(13)     C(14)     C(15)     107.6(6)   1_555 1_555 1_555 yes
   C(13)     C(14)     C(19)     125.0(7)   1_555 1_555 1_555 yes
   C(15)     C(14)     C(19)     126.9(7)   1_555 1_555 1_555 yes
   Ru(1)     C(15)     C(11)     71.8(4)    1_555 1_555 1_555 yes
   Ru(1)     C(15)     C(14)     69.7(4)    1_555 1_555 1_555 yes
   Ru(1)     C(15)     C(20)     129.5(5)   1_555 1_555 1_555 yes
   C(11)     C(15)     C(14)     107.9(6)   1_555 1_555 1_555 yes
   C(11)     C(15)     C(20)     127.3(7)   1_555 1_555 1_555 yes
   C(14)     C(15)     C(20)     124.4(7)   1_555 1_555 1_555 yes
   C(11)     C(16)     H(11)     109.5(7)   1_555 1_555 1_555 no
   C(11)     C(16)     H(12)     109.4(6)   1_555 1_555 1_555 no
   C(11)     C(16)     H(13)     109.5(7)   1_555 1_555 1_555 no
   H(11)     C(16)     H(12)     109.5(7)   1_555 1_555 1_555 no
   H(11)     C(16)     H(13)     109.5(7)   1_555 1_555 1_555 no
   H(12)     C(16)     H(13)     109.5(7)   1_555 1_555 1_555 no
   C(12)     C(17)     H(14)     109.5(7)   1_555 1_555 1_555 no
   C(12)     C(17)     H(15)     109.5(7)   1_555 1_555 1_555 no
   C(12)     C(17)     H(16)     109.5(6)   1_555 1_555 1_555 no
   H(14)     C(17)     H(15)     109.5(7)   1_555 1_555 1_555 no
   H(14)     C(17)     H(16)     109.5(8)   1_555 1_555 1_555 no
   H(15)     C(17)     H(16)     109.5(7)   1_555 1_555 1_555 no
   C(13)     C(18)     H(17)     109.5(7)   1_555 1_555 1_555 no
   C(13)     C(18)     H(18)     109.5(6)   1_555 1_555 1_555 no
   C(13)     C(18)     H(19)     109.4(7)   1_555 1_555 1_555 no
   H(17)     C(18)     H(18)     109.5(8)   1_555 1_555 1_555 no
   H(17)     C(18)     H(19)     109.5(7)   1_555 1_555 1_555 no
   H(18)     C(18)     H(19)     109.5(8)   1_555 1_555 1_555 no
   C(14)     C(19)     H(20)     109.5(7)   1_555 1_555 1_555 no
   C(14)     C(19)     H(21)     109.4(7)   1_555 1_555 1_555 no
   C(14)     C(19)     H(22)     109.5(7)   1_555 1_555 1_555 no
   H(20)     C(19)     H(21)     109.5(8)   1_555 1_555 1_555 no
   H(20)     C(19)     H(22)     109.5(8)   1_555 1_555 1_555 no
   H(21)     C(19)     H(22)     109.5(7)   1_555 1_555 1_555 no
   C(15)     C(20)     H(23)     109.5(6)   1_555 1_555 1_555 no
   C(15)     C(20)     H(24)     109.5(7)   1_555 1_555 1_555 no
   C(15)     C(20)     H(25)     109.5(7)   1_555 1_555 1_555 no
   H(23)     C(20)     H(24)     109.5(8)   1_555 1_555 1_555 no
   H(23)     C(20)     H(25)     109.5(7)   1_555 1_555 1_555 no
   H(24)     C(20)     H(25)     109.5(7)   1_555 1_555 1_555 no
   Ru(2)     C(21)     C(22)     71.1(4)    1_555 1_555 1_555 yes
   Ru(2)     C(21)     C(25)     72.2(4)    1_555 1_555 1_555 yes
   Ru(2)     C(21)     C(26)     127.9(5)   1_555 1_555 1_555 yes
   C(22)     C(21)     C(25)     108.5(6)   1_555 1_555 1_555 yes
   C(22)     C(21)     C(26)     124.5(7)   1_555 1_555 1_555 yes
   C(25)     C(21)     C(26)     126.6(7)   1_555 1_555 1_555 yes
   Ru(2)     C(22)     C(21)     71.5(3)    1_555 1_555 1_555 yes
   Ru(2)     C(22)     C(23)     72.0(3)    1_555 1_555 1_555 yes
   Ru(2)     C(22)     C(27)     128.3(5)   1_555 1_555 1_555 yes
   C(21)     C(22)     C(23)     106.8(6)   1_555 1_555 1_555 yes
   C(21)     C(22)     C(27)     126.4(7)   1_555 1_555 1_555 yes
   C(23)     C(22)     C(27)     126.3(7)   1_555 1_555 1_555 yes
   Ru(2)     C(23)     C(22)     71.0(3)    1_555 1_555 1_555 yes
   Ru(2)     C(23)     C(24)     70.5(3)    1_555 1_555 1_555 yes
   Ru(2)     C(23)     C(28)     129.6(5)   1_555 1_555 1_555 yes
   C(22)     C(23)     C(24)     108.7(6)   1_555 1_555 1_555 yes
   C(22)     C(23)     C(28)     124.7(7)   1_555 1_555 1_555 yes
   C(24)     C(23)     C(28)     126.3(6)   1_555 1_555 1_555 yes
   Ru(2)     C(24)     C(23)     72.8(4)    1_555 1_555 1_555 yes
   Ru(2)     C(24)     C(25)     72.8(4)    1_555 1_555 1_555 yes
   Ru(2)     C(24)     C(29)     127.3(4)   1_555 1_555 1_555 yes
   C(23)     C(24)     C(25)     108.3(6)   1_555 1_555 1_555 yes
   C(23)     C(24)     C(29)     125.8(7)   1_555 1_555 1_555 yes
   C(25)     C(24)     C(29)     125.3(7)   1_555 1_555 1_555 yes
   Ru(2)     C(25)     C(21)     71.1(4)    1_555 1_555 1_555 yes
   Ru(2)     C(25)     C(24)     70.1(4)    1_555 1_555 1_555 yes
   Ru(2)     C(25)     C(30)     130.8(4)   1_555 1_555 1_555 yes
   C(21)     C(25)     C(24)     107.6(6)   1_555 1_555 1_555 yes
   C(21)     C(25)     C(30)     126.5(7)   1_555 1_555 1_555 yes
   C(24)     C(25)     C(30)     125.3(7)   1_555 1_555 1_555 yes
   C(21)     C(26)     H(26)     109.5(7)   1_555 1_555 1_555 no
   C(21)     C(26)     H(27)     109.5(7)   1_555 1_555 1_555 no
   C(21)     C(26)     H(28)     109.4(7)   1_555 1_555 1_555 no
   H(26)     C(26)     H(27)     109.5(7)   1_555 1_555 1_555 no
   H(26)     C(26)     H(28)     109.5(8)   1_555 1_555 1_555 no
   H(27)     C(26)     H(28)     109.5(8)   1_555 1_555 1_555 no
   C(22)     C(27)     H(29)     109.5(7)   1_555 1_555 1_555 no
   C(22)     C(27)     H(30)     109.5(7)   1_555 1_555 1_555 no
   C(22)     C(27)     H(31)     109.5(6)   1_555 1_555 1_555 no
   H(29)     C(27)     H(30)     109.5(7)   1_555 1_555 1_555 no
   H(29)     C(27)     H(31)     109.5(8)   1_555 1_555 1_555 no
   H(30)     C(27)     H(31)     109.5(8)   1_555 1_555 1_555 no
   C(23)     C(28)     H(32)     109.5(7)   1_555 1_555 1_555 no
   C(23)     C(28)     H(33)     109.5(6)   1_555 1_555 1_555 no
   C(23)     C(28)     H(34)     109.5(7)   1_555 1_555 1_555 no
   H(32)     C(28)     H(33)     109.5(8)   1_555 1_555 1_555 no
   H(32)     C(28)     H(34)     109.5(7)   1_555 1_555 1_555 no
   H(33)     C(28)     H(34)     109.5(8)   1_555 1_555 1_555 no
   C(24)     C(29)     H(35)     109.5(7)   1_555 1_555 1_555 no
   C(24)     C(29)     H(36)     109.5(6)   1_555 1_555 1_555 no
   C(24)     C(29)     H(37)     109.4(6)   1_555 1_555 1_555 no
   H(35)     C(29)     H(36)     109.5(7)   1_555 1_555 1_555 no
   H(35)     C(29)     H(37)     109.5(7)   1_555 1_555 1_555 no
   H(36)     C(29)     H(37)     109.5(8)   1_555 1_555 1_555 no
   C(25)     C(30)     H(38)     109.5(7)   1_555 1_555 1_555 no
   C(25)     C(30)     H(39)     109.5(6)   1_555 1_555 1_555 no
   C(25)     C(30)     H(40)     109.5(6)   1_555 1_555 1_555 no
   H(38)     C(30)     H(39)     109.5(7)   1_555 1_555 1_555 no
   H(38)     C(30)     H(40)     109.5(7)   1_555 1_555 1_555 no
   H(39)     C(30)     H(40)     109.5(8)   1_555 1_555 1_555 no
   O(1)      C(31)     N(1)      129(1)     1_555 1_555 1_555 yes
   O(1)      C(31)     H(41)     115(1)     1_555 1_555 1_555 no
   N(1)      C(31)     H(41)     115(1)     1_555 1_555 1_555 no
   N(1)      C(32)     H(42)     109(1)     1_555 1_555 1_555 no
   N(1)      C(32)     H(43)     109(1)     1_555 1_555 1_555 no
   N(1)      C(32)     H(44)     109(1)     1_555 1_555 1_555 no
   H(42)     C(32)     H(43)     109(1)     1_555 1_555 1_555 no
   H(42)     C(32)     H(44)     109(1)     1_555 1_555 1_555 no
   H(43)     C(32)     H(44)     109(1)     1_555 1_555 1_555 no
   N(1)      C(33)     H(45)     109(1)     1_555 1_555 1_555 no
   N(1)      C(33)     H(46)     109(1)     1_555 1_555 1_555 no
   N(1)      C(33)     H(47)     109(1)     1_555 1_555 1_555 no
   H(45)     C(33)     H(46)     109(1)     1_555 1_555 1_555 no
   H(45)     C(33)     H(47)     109(1)     1_555 1_555 1_555 no
   H(46)     C(33)     H(47)     109(1)     1_555 1_555 1_555 no
   O(2)      C(34)     N(2)      126.7(8)   1_555 1_555 1_555 yes
   O(2)      C(34)     H(48)     116.7(9)   1_555 1_555 1_555 no
   N(2)      C(34)     H(48)     116.7(8)   1_555 1_555 1_555 no
   N(2)      C(35)     H(49)     109.4(8)   1_555 1_555 1_555 no
   N(2)      C(35)     H(50)     109.4(8)   1_555 1_555 1_555 no
   N(2)      C(35)     H(51)     109.5(8)   1_555 1_555 1_555 no
   H(49)     C(35)     H(50)     109.5(9)   1_555 1_555 1_555 no
   H(49)     C(35)     H(51)     109.5(9)   1_555 1_555 1_555 no
   H(50)     C(35)     H(51)     109.5(9)   1_555 1_555 1_555 no
   N(2)      C(36)     H(52)     109.5(8)   1_555 1_555 1_555 no
   N(2)      C(36)     H(53)     109.5(8)   1_555 1_555 1_555 no
   N(2)      C(36)     H(54)     109.4(9)   1_555 1_555 1_555 no
   H(52)     C(36)     H(53)     109.5(10)  1_555 1_555 1_555 no
   H(52)     C(36)     H(54)     109.5(8)   1_555 1_555 1_555 no
   H(53)     C(36)     H(54)     109.5(9)   1_555 1_555 1_555 no
#------------------------------------------------------------------------------
loop_
_geom_torsion_atom_site_label_1
_geom_torsion_atom_site_label_2
_geom_torsion_atom_site_label_3
_geom_torsion_atom_site_label_4
_geom_torsion
_geom_torsion_site_symmetry_1
_geom_torsion_site_symmetry_2
_geom_torsion_site_symmetry_3
_geom_torsion_site_symmetry_4
_geom_torsion_publ_flag
   Ru(1)   Ru(2)   Ti(1)   Ti(2)   70.20(3) 1_555 1_555 1_555 1_555 yes
   Ru(1)   Ru(2)   Ti(1)   S(1)    36.72(5) 1_555 1_555 1_555 1_555 yes
   Ru(1)   Ru(2)   Ti(1)   S(2)    128.52(6) 1_555 1_555 1_555 1_555 yes
   Ru(1)   Ru(2)   Ti(1)   S(3)    -63.56(6) 1_555 1_555 1_555 1_555 yes
   Ru(1)   Ru(2)   Ti(1)   C(1)    145.9(6) 1_555 1_555 1_555 1_555 yes
   Ru(1)   Ru(2)   Ti(1)   C(2)    174.4(3) 1_555 1_555 1_555 1_555 yes
   Ru(1)   Ru(2)   Ti(1)   C(3)    -146.8(3) 1_555 1_555 1_555 1_555 yes
   Ru(1)   Ru(2)   Ti(1)   C(4)    -106.9(3) 1_555 1_555 1_555 1_555 yes
   Ru(1)   Ru(2)   Ti(1)   C(5)    -80.0(7) 1_555 1_555 1_555 1_555 yes
   Ru(1)   Ru(2)   Ti(2)   Ti(1)   -71.97(3) 1_555 1_555 1_555 1_555 yes
   Ru(1)   Ru(2)   Ti(2)   S(1)    -38.42(5) 1_555 1_555 1_555 1_555 yes
   Ru(1)   Ru(2)   Ti(2)   S(2)    -131.10(6) 1_555 1_555 1_555 1_555 yes
   Ru(1)   Ru(2)   Ti(2)   S(4)    64.26(6) 1_555 1_555 1_555 1_555 yes
   Ru(1)   Ru(2)   Ti(2)   C(6)    110.1(3) 1_555 1_555 1_555 1_555 yes
   Ru(1)   Ru(2)   Ti(2)   C(7)    150.2(2) 1_555 1_555 1_555 1_555 yes
   Ru(1)   Ru(2)   Ti(2)   C(8)    -169.8(3) 1_555 1_555 1_555 1_555 yes
   Ru(1)   Ru(2)   Ti(2)   C(9)    -136.7(8) 1_555 1_555 1_555 1_555 yes
   Ru(1)   Ru(2)   Ti(2)   C(10)   74.5(5)  1_555 1_555 1_555 1_555 yes
   Ru(1)   Ru(2)   S(2)    Ti(1)   -44.42(5) 1_555 1_555 1_555 1_555 yes
   Ru(1)   Ru(2)   S(2)    Ti(2)   41.83(5) 1_555 1_555 1_555 1_555 yes
   Ru(1)   Ru(2)   S(3)    Ti(1)   83.50(5) 1_555 1_555 1_555 1_555 yes
   Ru(1)   Ru(2)   S(4)    Ti(2)   -82.41(5) 1_555 1_555 1_555 1_555 yes
   Ru(1)   Ru(2)   C(21)   C(22)   -139.9(3) 1_555 1_555 1_555 1_555 yes
   Ru(1)   Ru(2)   C(21)   C(25)   102.6(4) 1_555 1_555 1_555 1_555 yes
   Ru(1)   Ru(2)   C(21)   C(26)   -20.4(7) 1_555 1_555 1_555 1_555 yes
   Ru(1)   Ru(2)   C(22)   C(21)   63.3(5)  1_555 1_555 1_555 1_555 yes
   Ru(1)   Ru(2)   C(22)   C(23)   178.7(3) 1_555 1_555 1_555 1_555 yes
   Ru(1)   Ru(2)   C(22)   C(27)   -58.9(8) 1_555 1_555 1_555 1_555 yes
   Ru(1)   Ru(2)   C(23)   C(22)   -12(2)   1_555 1_555 1_555 1_555 yes
   Ru(1)   Ru(2)   C(23)   C(24)   106(2)   1_555 1_555 1_555 1_555 yes
   Ru(1)   Ru(2)   C(23)   C(28)   -132(2)  1_555 1_555 1_555 1_555 yes
   Ru(1)   Ru(2)   C(24)   C(23)   -173.7(3) 1_555 1_555 1_555 1_555 yes
   Ru(1)   Ru(2)   C(24)   C(25)   -57.5(5) 1_555 1_555 1_555 1_555 yes
   Ru(1)   Ru(2)   C(24)   C(29)   64.1(8)  1_555 1_555 1_555 1_555 yes
   Ru(1)   Ru(2)   C(25)   C(21)   -96.1(4) 1_555 1_555 1_555 1_555 yes
   Ru(1)   Ru(2)   C(25)   C(24)   146.3(3) 1_555 1_555 1_555 1_555 yes
   Ru(1)   Ru(2)   C(25)   C(30)   26.4(8)  1_555 1_555 1_555 1_555 yes
   Ru(1)   Ti(1)   Ru(2)   Ti(2)   -70.20(3) 1_555 1_555 1_555 1_555 yes
   Ru(1)   Ti(1)   Ru(2)   S(2)    -128.52(6) 1_555 1_555 1_555 1_555 yes
   Ru(1)   Ti(1)   Ru(2)   S(3)    63.56(6) 1_555 1_555 1_555 1_555 yes
   Ru(1)   Ti(1)   Ru(2)   S(4)    -38.45(5) 1_555 1_555 1_555 1_555 yes
   Ru(1)   Ti(1)   Ru(2)   C(21)   86.0(6)  1_555 1_555 1_555 1_555 yes
   Ru(1)   Ti(1)   Ru(2)   C(22)   -152.3(4) 1_555 1_555 1_555 1_555 yes
   Ru(1)   Ti(1)   Ru(2)   C(23)   -179.5(2) 1_555 1_555 1_555 1_555 yes
   Ru(1)   Ti(1)   Ru(2)   C(24)   141.8(2) 1_555 1_555 1_555 1_555 yes
   Ru(1)   Ti(1)   Ru(2)   C(25)   104.5(2) 1_555 1_555 1_555 1_555 yes
   Ru(1)   Ti(1)   Ti(2)   Ru(2)   66.93(3) 1_555 1_555 1_555 1_555 yes
   Ru(1)   Ti(1)   Ti(2)   S(1)    -65.24(6) 1_555 1_555 1_555 1_555 yes
   Ru(1)   Ti(1)   Ti(2)   S(2)    132.42(7) 1_555 1_555 1_555 1_555 yes
   Ru(1)   Ti(1)   Ti(2)   S(4)    34.47(5) 1_555 1_555 1_555 1_555 yes
   Ru(1)   Ti(1)   Ti(2)   C(6)    -127(1)  1_555 1_555 1_555 1_555 yes
   Ru(1)   Ti(1)   Ti(2)   C(7)    163.4(3) 1_555 1_555 1_555 1_555 yes
   Ru(1)   Ti(1)   Ti(2)   C(8)    -165.1(2) 1_555 1_555 1_555 1_555 yes
   Ru(1)   Ti(1)   Ti(2)   C(9)    -126.4(3) 1_555 1_555 1_555 1_555 yes
   Ru(1)   Ti(1)   Ti(2)   C(10)   -93.0(3) 1_555 1_555 1_555 1_555 yes
   Ru(1)   Ti(1)   S(1)    Ti(2)   78.91(5) 1_555 1_555 1_555 1_555 yes
   Ru(1)   Ti(1)   S(2)    Ru(2)   40.73(4) 1_555 1_555 1_555 1_555 yes
   Ru(1)   Ti(1)   S(2)    Ti(2)   -39.02(5) 1_555 1_555 1_555 1_555 yes
   Ru(1)   Ti(1)   S(3)    Ru(2)   -75.35(4) 1_555 1_555 1_555 1_555 yes
   Ru(1)   Ti(1)   C(1)    C(2)    175.6(5) 1_555 1_555 1_555 1_555 yes
   Ru(1)   Ti(1)   C(1)    C(5)    -67.7(6) 1_555 1_555 1_555 1_555 yes
   Ru(1)   Ti(1)   C(2)    C(1)    -23(2)   1_555 1_555 1_555 1_555 yes
   Ru(1)   Ti(1)   C(2)    C(3)    -140(1)  1_555 1_555 1_555 1_555 yes
   Ru(1)   Ti(1)   C(3)    C(2)    170.9(4) 1_555 1_555 1_555 1_555 yes
   Ru(1)   Ti(1)   C(3)    C(4)    57.1(7)  1_555 1_555 1_555 1_555 yes
   Ru(1)   Ti(1)   C(4)    C(3)    -150.3(5) 1_555 1_555 1_555 1_555 yes
   Ru(1)   Ti(1)   C(4)    C(5)    94.6(5)  1_555 1_555 1_555 1_555 yes
   Ru(1)   Ti(1)   C(5)    C(1)    136.4(5) 1_555 1_555 1_555 1_555 yes
   Ru(1)   Ti(1)   C(5)    C(4)    -107.0(5) 1_555 1_555 1_555 1_555 yes
   Ru(1)   Ti(2)   Ru(2)   Ti(1)   71.97(3) 1_555 1_555 1_555 1_555 yes
   Ru(1)   Ti(2)   Ru(2)   S(2)    131.10(6) 1_555 1_555 1_555 1_555 yes
   Ru(1)   Ti(2)   Ru(2)   S(3)    38.31(5) 1_555 1_555 1_555 1_555 yes
   Ru(1)   Ti(2)   Ru(2)   S(4)    -64.26(6) 1_555 1_555 1_555 1_555 yes
   Ru(1)   Ti(2)   Ru(2)   C(21)   -98.8(2) 1_555 1_555 1_555 1_555 yes
   Ru(1)   Ti(2)   Ru(2)   C(22)   -135.6(2) 1_555 1_555 1_555 1_555 yes
   Ru(1)   Ti(2)   Ru(2)   C(23)   -175.7(2) 1_555 1_555 1_555 1_555 yes
   Ru(1)   Ti(2)   Ru(2)   C(24)   153.8(3) 1_555 1_555 1_555 1_555 yes
   Ru(1)   Ti(2)   Ru(2)   C(25)   -85.9(8) 1_555 1_555 1_555 1_555 yes
   Ru(1)   Ti(2)   Ti(1)   Ru(2)   -66.93(3) 1_555 1_555 1_555 1_555 yes
   Ru(1)   Ti(2)   Ti(1)   S(1)    65.24(6) 1_555 1_555 1_555 1_555 yes
   Ru(1)   Ti(2)   Ti(1)   S(2)    -132.42(7) 1_555 1_555 1_555 1_555 yes
   Ru(1)   Ti(2)   Ti(1)   S(3)    -32.62(5) 1_555 1_555 1_555 1_555 yes
   Ru(1)   Ti(2)   Ti(1)   C(1)    134.7(3) 1_555 1_555 1_555 1_555 yes
   Ru(1)   Ti(2)   Ti(1)   C(2)    172.3(3) 1_555 1_555 1_555 1_555 yes
   Ru(1)   Ti(2)   Ti(1)   C(3)    -158.3(4) 1_555 1_555 1_555 1_555 yes
   Ru(1)   Ti(2)   Ti(1)   C(4)    100(1)   1_555 1_555 1_555 1_555 yes
   Ru(1)   Ti(2)   Ti(1)   C(5)    101.2(3) 1_555 1_555 1_555 1_555 yes
   Ru(1)   Ti(2)   S(1)    Ti(1)   -79.72(5) 1_555 1_555 1_555 1_555 yes
   Ru(1)   Ti(2)   S(2)    Ru(2)   -38.92(4) 1_555 1_555 1_555 1_555 yes
   Ru(1)   Ti(2)   S(2)    Ti(1)   39.50(5) 1_555 1_555 1_555 1_555 yes
   Ru(1)   Ti(2)   S(4)    Ru(2)   75.19(4) 1_555 1_555 1_555 1_555 yes
   Ru(1)   Ti(2)   C(6)    C(7)    157.9(4) 1_555 1_555 1_555 1_555 yes
   Ru(1)   Ti(2)   C(6)    C(10)   -84.1(5) 1_555 1_555 1_555 1_555 yes
   Ru(1)   Ti(2)   C(7)    C(6)    -45.4(7) 1_555 1_555 1_555 1_555 yes
   Ru(1)   Ti(2)   C(7)    C(8)    -160.7(4) 1_555 1_555 1_555 1_555 yes
   Ru(1)   Ti(2)   C(8)    C(7)    142.1(7) 1_555 1_555 1_555 1_555 yes
   Ru(1)   Ti(2)   C(8)    C(9)    26(1)    1_555 1_555 1_555 1_555 yes
   Ru(1)   Ti(2)   C(9)    C(8)    -171.9(4) 1_555 1_555 1_555 1_555 yes
   Ru(1)   Ti(2)   C(9)    C(10)   71.9(5)  1_555 1_555 1_555 1_555 yes
   Ru(1)   Ti(2)   C(10)   C(6)    115.6(4) 1_555 1_555 1_555 1_555 yes
   Ru(1)   Ti(2)   C(10)   C(9)    -129.9(4) 1_555 1_555 1_555 1_555 yes
   Ru(1)   S(1)    Ti(1)   Ru(2)   -39.18(4) 1_555 1_555 1_555 1_555 yes
   Ru(1)   S(1)    Ti(1)   Ti(2)   -78.91(5) 1_555 1_555 1_555 1_555 yes
   Ru(1)   S(1)    Ti(1)   S(2)    -91.99(6) 1_555 1_555 1_555 1_555 yes
   Ru(1)   S(1)    Ti(1)   S(3)    11.64(6) 1_555 1_555 1_555 1_555 yes
   Ru(1)   S(1)    Ti(1)   C(1)    160.0(2) 1_555 1_555 1_555 1_555 yes
   Ru(1)   S(1)    Ti(1)   C(2)    178.3(2) 1_555 1_555 1_555 1_555 yes
   Ru(1)   S(1)    Ti(1)   C(3)    146.9(6) 1_555 1_555 1_555 1_555 yes
   Ru(1)   S(1)    Ti(1)   C(4)    108.3(3) 1_555 1_555 1_555 1_555 yes
   Ru(1)   S(1)    Ti(1)   C(5)    125.6(2) 1_555 1_555 1_555 1_555 yes
   Ru(1)   S(1)    Ti(2)   Ru(2)   40.65(4) 1_555 1_555 1_555 1_555 yes
   Ru(1)   S(1)    Ti(2)   Ti(1)   79.72(5) 1_555 1_555 1_555 1_555 yes
   Ru(1)   S(1)    Ti(2)   S(2)    92.80(6) 1_555 1_555 1_555 1_555 yes
   Ru(1)   S(1)    Ti(2)   S(4)    -9.53(7) 1_555 1_555 1_555 1_555 yes
   Ru(1)   S(1)    Ti(2)   C(6)    -107.9(2) 1_555 1_555 1_555 1_555 yes
   Ru(1)   S(1)    Ti(2)   C(7)    -153.0(4) 1_555 1_555 1_555 1_555 yes
   Ru(1)   S(1)    Ti(2)   C(8)    -175.2(2) 1_555 1_555 1_555 1_555 yes
   Ru(1)   S(1)    Ti(2)   C(9)    -152.6(3) 1_555 1_555 1_555 1_555 yes
   Ru(1)   S(1)    Ti(2)   C(10)   -117.7(2) 1_555 1_555 1_555 1_555 yes
   Ru(1)   S(3)    Ru(2)   Ti(1)   -83.50(5) 1_555 1_555 1_555 1_555 yes
   Ru(1)   S(3)    Ru(2)   Ti(2)   -42.89(5) 1_555 1_555 1_555 1_555 yes
   Ru(1)   S(3)    Ru(2)   S(2)    -92.81(5) 1_555 1_555 1_555 1_555 yes
   Ru(1)   S(3)    Ru(2)   S(4)    6.49(6)  1_555 1_555 1_555 1_555 yes
   Ru(1)   S(3)    Ru(2)   C(21)   103.6(2) 1_555 1_555 1_555 1_555 yes
   Ru(1)   S(3)    Ru(2)   C(22)   126.0(3) 1_555 1_555 1_555 1_555 yes
   Ru(1)   S(3)    Ru(2)   C(23)   176.1(2) 1_555 1_555 1_555 1_555 yes
   Ru(1)   S(3)    Ru(2)   C(24)   164.3(2) 1_555 1_555 1_555 1_555 yes
   Ru(1)   S(3)    Ru(2)   C(25)   127.9(2) 1_555 1_555 1_555 1_555 yes
   Ru(1)   S(3)    Ti(1)   Ru(2)   75.35(4) 1_555 1_555 1_555 1_555 yes
   Ru(1)   S(3)    Ti(1)   Ti(2)   36.56(5) 1_555 1_555 1_555 1_555 yes
   Ru(1)   S(3)    Ti(1)   S(1)    -11.91(6) 1_555 1_555 1_555 1_555 yes
   Ru(1)   S(3)    Ti(1)   S(2)    85.16(7) 1_555 1_555 1_555 1_555 yes
   Ru(1)   S(3)    Ti(1)   C(1)    -122.4(4) 1_555 1_555 1_555 1_555 yes
   Ru(1)   S(3)    Ti(1)   C(2)    -175.4(3) 1_555 1_555 1_555 1_555 yes
   Ru(1)   S(3)    Ti(1)   C(3)    -170.0(2) 1_555 1_555 1_555 1_555 yes
   Ru(1)   S(3)    Ti(1)   C(4)    -135.9(3) 1_555 1_555 1_555 1_555 yes
   Ru(1)   S(3)    Ti(1)   C(5)    -109.8(2) 1_555 1_555 1_555 1_555 yes
   Ru(1)   S(4)    Ru(2)   Ti(1)   43.76(5) 1_555 1_555 1_555 1_555 yes
   Ru(1)   S(4)    Ru(2)   Ti(2)   82.41(5) 1_555 1_555 1_555 1_555 yes
   Ru(1)   S(4)    Ru(2)   S(2)    94.08(5) 1_555 1_555 1_555 1_555 yes
   Ru(1)   S(4)    Ru(2)   S(3)    -6.50(6) 1_555 1_555 1_555 1_555 yes
   Ru(1)   S(4)    Ru(2)   C(21)   -122.3(2) 1_555 1_555 1_555 1_555 yes
   Ru(1)   S(4)    Ru(2)   C(22)   -159.7(2) 1_555 1_555 1_555 1_555 yes
   Ru(1)   S(4)    Ru(2)   C(23)   -176.8(2) 1_555 1_555 1_555 1_555 yes
   Ru(1)   S(4)    Ru(2)   C(24)   -136.7(4) 1_555 1_555 1_555 1_555 yes
   Ru(1)   S(4)    Ru(2)   C(25)   -102.4(2) 1_555 1_555 1_555 1_555 yes
   Ru(1)   S(4)    Ti(2)   Ru(2)   -75.19(4) 1_555 1_555 1_555 1_555 yes
   Ru(1)   S(4)    Ti(2)   Ti(1)   -38.88(5) 1_555 1_555 1_555 1_555 yes
   Ru(1)   S(4)    Ti(2)   S(1)    9.75(7)  1_555 1_555 1_555 1_555 yes
   Ru(1)   S(4)    Ti(2)   S(2)    -87.47(6) 1_555 1_555 1_555 1_555 yes
   Ru(1)   S(4)    Ti(2)   C(6)    139.0(2) 1_555 1_555 1_555 1_555 yes
   Ru(1)   S(4)    Ti(2)   C(7)    169.6(2) 1_555 1_555 1_555 1_555 yes
   Ru(1)   S(4)    Ti(2)   C(8)    169.1(3) 1_555 1_555 1_555 1_555 yes
   Ru(1)   S(4)    Ti(2)   C(9)    112.5(3) 1_555 1_555 1_555 1_555 yes
   Ru(1)   S(4)    Ti(2)   C(10)   109.1(2) 1_555 1_555 1_555 1_555 yes
   Ru(1)   C(11)   C(12)   C(13)   -62.2(4) 1_555 1_555 1_555 1_555 yes
   Ru(1)   C(11)   C(12)   C(17)   124.3(6) 1_555 1_555 1_555 1_555 yes
   Ru(1)   C(11)   C(15)   C(14)   60.7(4)  1_555 1_555 1_555 1_555 yes
   Ru(1)   C(11)   C(15)   C(20)   -126.3(7) 1_555 1_555 1_555 1_555 yes
   Ru(1)   C(12)   C(11)   C(15)   62.5(4)  1_555 1_555 1_555 1_555 yes
   Ru(1)   C(12)   C(11)   C(16)   -124.9(6) 1_555 1_555 1_555 1_555 yes
   Ru(1)   C(12)   C(13)   C(14)   -61.0(4) 1_555 1_555 1_555 1_555 yes
   Ru(1)   C(12)   C(13)   C(18)   123.5(6) 1_555 1_555 1_555 1_555 yes
   Ru(1)   C(13)   C(12)   C(11)   62.5(4)  1_555 1_555 1_555 1_555 yes
   Ru(1)   C(13)   C(12)   C(17)   -124.2(7) 1_555 1_555 1_555 1_555 yes
   Ru(1)   C(13)   C(14)   C(15)   -65.4(4) 1_555 1_555 1_555 1_555 yes
   Ru(1)   C(13)   C(14)   C(19)   122.6(6) 1_555 1_555 1_555 1_555 yes
   Ru(1)   C(14)   C(13)   C(12)   62.6(4)  1_555 1_555 1_555 1_555 yes
   Ru(1)   C(14)   C(13)   C(18)   -122.0(7) 1_555 1_555 1_555 1_555 yes
   Ru(1)   C(14)   C(15)   C(11)   -62.0(4) 1_555 1_555 1_555 1_555 yes
   Ru(1)   C(14)   C(15)   C(20)   124.7(6) 1_555 1_555 1_555 1_555 yes
   Ru(1)   C(15)   C(11)   C(12)   -62.8(4) 1_555 1_555 1_555 1_555 yes
   Ru(1)   C(15)   C(11)   C(16)   124.8(7) 1_555 1_555 1_555 1_555 yes
   Ru(1)   C(15)   C(14)   C(13)   65.0(4)  1_555 1_555 1_555 1_555 yes
   Ru(1)   C(15)   C(14)   C(19)   -123.2(7) 1_555 1_555 1_555 1_555 yes
   Ru(2)   Ru(1)   Ti(1)   Ti(2)   -71.94(3) 1_555 1_555 1_555 1_555 yes
   Ru(2)   Ru(1)   Ti(1)   S(1)    -130.80(6) 1_555 1_555 1_555 1_555 yes
   Ru(2)   Ru(1)   Ti(1)   S(2)    -38.57(5) 1_555 1_555 1_555 1_555 yes
   Ru(2)   Ru(1)   Ti(1)   S(3)    64.11(5) 1_555 1_555 1_555 1_555 yes
   Ru(2)   Ru(1)   Ti(1)   C(1)    -162.6(3) 1_555 1_555 1_555 1_555 yes
   Ru(2)   Ru(1)   Ti(1)   C(2)    -142(1)  1_555 1_555 1_555 1_555 yes
   Ru(2)   Ru(1)   Ti(1)   C(3)    84.2(4)  1_555 1_555 1_555 1_555 yes
   Ru(2)   Ru(1)   Ti(1)   C(4)    120.2(3) 1_555 1_555 1_555 1_555 yes
   Ru(2)   Ru(1)   Ti(1)   C(5)    160.7(3) 1_555 1_555 1_555 1_555 yes
   Ru(2)   Ru(1)   Ti(2)   Ti(1)   70.01(3) 1_555 1_555 1_555 1_555 yes
   Ru(2)   Ru(1)   Ti(2)   S(1)    128.52(6) 1_555 1_555 1_555 1_555 yes
   Ru(2)   Ru(1)   Ti(2)   S(2)    36.58(5) 1_555 1_555 1_555 1_555 yes
   Ru(2)   Ru(1)   Ti(2)   S(4)    -63.54(6) 1_555 1_555 1_555 1_555 yes
   Ru(2)   Ru(1)   Ti(2)   C(6)    -116.5(2) 1_555 1_555 1_555 1_555 yes
   Ru(2)   Ru(1)   Ti(2)   C(7)    -87.2(4) 1_555 1_555 1_555 1_555 yes
   Ru(2)   Ru(1)   Ti(2)   C(8)    147.5(8) 1_555 1_555 1_555 1_555 yes
   Ru(2)   Ru(1)   Ti(2)   C(9)    167.5(3) 1_555 1_555 1_555 1_555 yes
   Ru(2)   Ru(1)   Ti(2)   C(10)   -154.9(3) 1_555 1_555 1_555 1_555 yes
   Ru(2)   Ru(1)   S(1)    Ti(1)   41.92(5) 1_555 1_555 1_555 1_555 yes
   Ru(2)   Ru(1)   S(1)    Ti(2)   -44.32(5) 1_555 1_555 1_555 1_555 yes
   Ru(2)   Ru(1)   S(3)    Ti(1)   -82.21(5) 1_555 1_555 1_555 1_555 yes
   Ru(2)   Ru(1)   S(4)    Ti(2)   83.57(5) 1_555 1_555 1_555 1_555 yes
   Ru(2)   Ru(1)   C(11)   C(12)   -130.8(4) 1_555 1_555 1_555 1_555 yes
   Ru(2)   Ru(1)   C(11)   C(15)   112.0(4) 1_555 1_555 1_555 1_555 yes
   Ru(2)   Ru(1)   C(11)   C(16)   -10.0(7) 1_555 1_555 1_555 1_555 yes
   Ru(2)   Ru(1)   C(12)   C(11)   70.9(4)  1_555 1_555 1_555 1_555 yes
   Ru(2)   Ru(1)   C(12)   C(13)   -172.4(3) 1_555 1_555 1_555 1_555 yes
   Ru(2)   Ru(1)   C(12)   C(17)   -49.2(7) 1_555 1_555 1_555 1_555 yes
   Ru(2)   Ru(1)   C(13)   C(12)   28(1)    1_555 1_555 1_555 1_555 yes
   Ru(2)   Ru(1)   C(13)   C(14)   146.7(7) 1_555 1_555 1_555 1_555 yes
   Ru(2)   Ru(1)   C(13)   C(18)   -91(1)   1_555 1_555 1_555 1_555 yes
   Ru(2)   Ru(1)   C(14)   C(13)   -166.2(3) 1_555 1_555 1_555 1_555 yes
   Ru(2)   Ru(1)   C(14)   C(15)   -51.0(6) 1_555 1_555 1_555 1_555 yes
   Ru(2)   Ru(1)   C(14)   C(19)   72.8(8)  1_555 1_555 1_555 1_555 yes
   Ru(2)   Ru(1)   C(15)   C(11)   -87.6(4) 1_555 1_555 1_555 1_555 yes
   Ru(2)   Ru(1)   C(15)   C(14)   154.6(3) 1_555 1_555 1_555 1_555 yes
   Ru(2)   Ru(1)   C(15)   C(20)   36.1(7)  1_555 1_555 1_555 1_555 yes
   Ru(2)   Ti(1)   Ru(1)   Ti(2)   71.94(3) 1_555 1_555 1_555 1_555 yes
   Ru(2)   Ti(1)   Ru(1)   S(1)    130.80(6) 1_555 1_555 1_555 1_555 yes
   Ru(2)   Ti(1)   Ru(1)   S(3)    -64.11(5) 1_555 1_555 1_555 1_555 yes
   Ru(2)   Ti(1)   Ru(1)   S(4)    38.35(5) 1_555 1_555 1_555 1_555 yes
   Ru(2)   Ti(1)   Ru(1)   C(11)   -93.7(3) 1_555 1_555 1_555 1_555 yes
   Ru(2)   Ti(1)   Ru(1)   C(12)   -127.4(2) 1_555 1_555 1_555 1_555 yes
   Ru(2)   Ti(1)   Ru(1)   C(13)   -167.5(2) 1_555 1_555 1_555 1_555 yes
   Ru(2)   Ti(1)   Ru(1)   C(14)   158.7(3) 1_555 1_555 1_555 1_555 yes
   Ru(2)   Ti(1)   Ru(1)   C(15)   -125(1)  1_555 1_555 1_555 1_555 yes
   Ru(2)   Ti(1)   Ti(2)   S(1)    -132.18(7) 1_555 1_555 1_555 1_555 yes
   Ru(2)   Ti(1)   Ti(2)   S(2)    65.49(6) 1_555 1_555 1_555 1_555 yes
   Ru(2)   Ti(1)   Ti(2)   S(4)    -32.47(5) 1_555 1_555 1_555 1_555 yes
   Ru(2)   Ti(1)   Ti(2)   C(6)    165(1)   1_555 1_555 1_555 1_555 yes
   Ru(2)   Ti(1)   Ti(2)   C(7)    96.5(3)  1_555 1_555 1_555 1_555 yes
   Ru(2)   Ti(1)   Ti(2)   C(8)    127.9(2) 1_555 1_555 1_555 1_555 yes
   Ru(2)   Ti(1)   Ti(2)   C(9)    166.6(3) 1_555 1_555 1_555 1_555 yes
   Ru(2)   Ti(1)   Ti(2)   C(10)   -159.9(3) 1_555 1_555 1_555 1_555 yes
   Ru(2)   Ti(1)   S(1)    Ti(2)   39.73(5) 1_555 1_555 1_555 1_555 yes
   Ru(2)   Ti(1)   S(2)    Ti(2)   -79.74(5) 1_555 1_555 1_555 1_555 yes
   Ru(2)   Ti(1)   C(1)    C(2)    41.4(10) 1_555 1_555 1_555 1_555 yes
   Ru(2)   Ti(1)   C(1)    C(5)    158.1(5) 1_555 1_555 1_555 1_555 yes
   Ru(2)   Ti(1)   C(2)    C(1)    -162.7(4) 1_555 1_555 1_555 1_555 yes
   Ru(2)   Ti(1)   C(2)    C(3)    79.9(6)  1_555 1_555 1_555 1_555 yes
   Ru(2)   Ti(1)   C(3)    C(2)    -121.8(5) 1_555 1_555 1_555 1_555 yes
   Ru(2)   Ti(1)   C(3)    C(4)    124.3(5) 1_555 1_555 1_555 1_555 yes
   Ru(2)   Ti(1)   C(4)    C(3)    -78.5(6) 1_555 1_555 1_555 1_555 yes
   Ru(2)   Ti(1)   C(4)    C(5)    166.5(4) 1_555 1_555 1_555 1_555 yes
   Ru(2)   Ti(1)   C(5)    C(1)    -153.8(6) 1_555 1_555 1_555 1_555 yes
   Ru(2)   Ti(1)   C(5)    C(4)    -37(1)   1_555 1_555 1_555 1_555 yes
   Ru(2)   Ti(2)   Ru(1)   Ti(1)   -70.01(3) 1_555 1_555 1_555 1_555 yes
   Ru(2)   Ti(2)   Ru(1)   S(1)    -128.52(6) 1_555 1_555 1_555 1_555 yes
   Ru(2)   Ti(2)   Ru(1)   S(3)    -38.13(5) 1_555 1_555 1_555 1_555 yes
   Ru(2)   Ti(2)   Ru(1)   S(4)    63.54(6) 1_555 1_555 1_555 1_555 yes
   Ru(2)   Ti(2)   Ru(1)   C(11)   86.5(4)  1_555 1_555 1_555 1_555 yes
   Ru(2)   Ti(2)   Ru(1)   C(12)   -151.2(6) 1_555 1_555 1_555 1_555 yes
   Ru(2)   Ti(2)   Ru(1)   C(13)   -171.7(2) 1_555 1_555 1_555 1_555 yes
   Ru(2)   Ti(2)   Ru(1)   C(14)   150.7(2) 1_555 1_555 1_555 1_555 yes
   Ru(2)   Ti(2)   Ru(1)   C(15)   111.8(2) 1_555 1_555 1_555 1_555 yes
   Ru(2)   Ti(2)   Ti(1)   S(1)    132.18(7) 1_555 1_555 1_555 1_555 yes
   Ru(2)   Ti(2)   Ti(1)   S(2)    -65.49(6) 1_555 1_555 1_555 1_555 yes
   Ru(2)   Ti(2)   Ti(1)   S(3)    34.31(5) 1_555 1_555 1_555 1_555 yes
   Ru(2)   Ti(2)   Ti(1)   C(1)    -158.4(3) 1_555 1_555 1_555 1_555 yes
   Ru(2)   Ti(2)   Ti(1)   C(2)    -120.7(3) 1_555 1_555 1_555 1_555 yes
   Ru(2)   Ti(2)   Ti(1)   C(3)    -91.4(4) 1_555 1_555 1_555 1_555 yes
   Ru(2)   Ti(2)   Ti(1)   C(4)    167(1)   1_555 1_555 1_555 1_555 yes
   Ru(2)   Ti(2)   Ti(1)   C(5)    168.1(3) 1_555 1_555 1_555 1_555 yes
   Ru(2)   Ti(2)   S(1)    Ti(1)   -39.07(5) 1_555 1_555 1_555 1_555 yes
   Ru(2)   Ti(2)   S(2)    Ti(1)   78.42(5) 1_555 1_555 1_555 1_555 yes
   Ru(2)   Ti(2)   C(6)    C(7)    86.2(5)  1_555 1_555 1_555 1_555 yes
   Ru(2)   Ti(2)   C(6)    C(10)   -155.8(4) 1_555 1_555 1_555 1_555 yes
   Ru(2)   Ti(2)   C(7)    C(6)    -116.8(4) 1_555 1_555 1_555 1_555 yes
   Ru(2)   Ti(2)   C(7)    C(8)    127.9(4) 1_555 1_555 1_555 1_555 yes
   Ru(2)   Ti(2)   C(8)    C(7)    -77.0(5) 1_555 1_555 1_555 1_555 yes
   Ru(2)   Ti(2)   C(8)    C(9)    167.2(4) 1_555 1_555 1_555 1_555 yes
   Ru(2)   Ti(2)   C(9)    C(8)    -42(1)   1_555 1_555 1_555 1_555 yes
   Ru(2)   Ti(2)   C(9)    C(10)   -159.1(6) 1_555 1_555 1_555 1_555 yes
   Ru(2)   Ti(2)   C(10)   C(6)    53.6(7)  1_555 1_555 1_555 1_555 yes
   Ru(2)   Ti(2)   C(10)   C(9)    168.1(4) 1_555 1_555 1_555 1_555 yes
   Ru(2)   S(2)    Ti(1)   Ti(2)   79.74(5) 1_555 1_555 1_555 1_555 yes
   Ru(2)   S(2)    Ti(1)   S(1)    92.79(6) 1_555 1_555 1_555 1_555 yes
   Ru(2)   S(2)    Ti(1)   S(3)    -9.54(7) 1_555 1_555 1_555 1_555 yes
   Ru(2)   S(2)    Ti(1)   C(1)    -173.7(2) 1_555 1_555 1_555 1_555 yes
   Ru(2)   S(2)    Ti(1)   C(2)    -146.2(3) 1_555 1_555 1_555 1_555 yes
   Ru(2)   S(2)    Ti(1)   C(3)    -114.2(3) 1_555 1_555 1_555 1_555 yes
   Ru(2)   S(2)    Ti(1)   C(4)    -112.6(3) 1_555 1_555 1_555 1_555 yes
   Ru(2)   S(2)    Ti(1)   C(5)    -166.9(4) 1_555 1_555 1_555 1_555 yes
   Ru(2)   S(2)    Ti(2)   Ti(1)   -78.42(5) 1_555 1_555 1_555 1_555 yes
   Ru(2)   S(2)    Ti(2)   S(1)    -91.51(6) 1_555 1_555 1_555 1_555 yes
   Ru(2)   S(2)    Ti(2)   S(4)    11.98(6) 1_555 1_555 1_555 1_555 yes
   Ru(2)   S(2)    Ti(2)   C(6)    110.6(3) 1_555 1_555 1_555 1_555 yes
   Ru(2)   S(2)    Ti(2)   C(7)    119.6(2) 1_555 1_555 1_555 1_555 yes
   Ru(2)   S(2)    Ti(2)   C(8)    153.7(2) 1_555 1_555 1_555 1_555 yes
   Ru(2)   S(2)    Ti(2)   C(9)    178.6(2) 1_555 1_555 1_555 1_555 yes
   Ru(2)   S(2)    Ti(2)   C(10)   161.0(4) 1_555 1_555 1_555 1_555 yes
   Ru(2)   S(3)    Ru(1)   Ti(1)   82.21(5) 1_555 1_555 1_555 1_555 yes
   Ru(2)   S(3)    Ru(1)   Ti(2)   43.47(5) 1_555 1_555 1_555 1_555 yes
   Ru(2)   S(3)    Ru(1)   S(1)    93.54(5) 1_555 1_555 1_555 1_555 yes
   Ru(2)   S(3)    Ru(1)   S(4)    -6.48(6) 1_555 1_555 1_555 1_555 yes
   Ru(2)   S(3)    Ru(1)   C(11)   -116.8(2) 1_555 1_555 1_555 1_555 yes
   Ru(2)   S(3)    Ru(1)   C(12)   -153.0(2) 1_555 1_555 1_555 1_555 yes
   Ru(2)   S(3)    Ru(1)   C(13)   -176.5(2) 1_555 1_555 1_555 1_555 yes
   Ru(2)   S(3)    Ru(1)   C(14)   -153.0(4) 1_555 1_555 1_555 1_555 yes
   Ru(2)   S(3)    Ru(1)   C(15)   -103.6(2) 1_555 1_555 1_555 1_555 yes
   Ru(2)   S(3)    Ti(1)   Ti(2)   -38.79(5) 1_555 1_555 1_555 1_555 yes
   Ru(2)   S(3)    Ti(1)   S(1)    -87.26(6) 1_555 1_555 1_555 1_555 yes
   Ru(2)   S(3)    Ti(1)   S(2)    9.81(7)  1_555 1_555 1_555 1_555 yes
   Ru(2)   S(3)    Ti(1)   C(1)    162.2(4) 1_555 1_555 1_555 1_555 yes
   Ru(2)   S(3)    Ti(1)   C(2)    109.2(3) 1_555 1_555 1_555 1_555 yes
   Ru(2)   S(3)    Ti(1)   C(3)    114.6(2) 1_555 1_555 1_555 1_555 yes
   Ru(2)   S(3)    Ti(1)   C(4)    148.7(3) 1_555 1_555 1_555 1_555 yes
   Ru(2)   S(3)    Ti(1)   C(5)    174.8(2) 1_555 1_555 1_555 1_555 yes
   Ru(2)   S(4)    Ru(1)   Ti(1)   -42.89(5) 1_555 1_555 1_555 1_555 yes
   Ru(2)   S(4)    Ru(1)   Ti(2)   -83.57(5) 1_555 1_555 1_555 1_555 yes
   Ru(2)   S(4)    Ru(1)   S(1)    -92.81(5) 1_555 1_555 1_555 1_555 yes
   Ru(2)   S(4)    Ru(1)   S(3)    6.46(6)  1_555 1_555 1_555 1_555 yes
   Ru(2)   S(4)    Ru(1)   C(11)   106.1(2) 1_555 1_555 1_555 1_555 yes
   Ru(2)   S(4)    Ru(1)   C(12)   114.1(3) 1_555 1_555 1_555 1_555 yes
   Ru(2)   S(4)    Ru(1)   C(13)   173.1(3) 1_555 1_555 1_555 1_555 yes
   Ru(2)   S(4)    Ru(1)   C(14)   169.8(2) 1_555 1_555 1_555 1_555 yes
   Ru(2)   S(4)    Ru(1)   C(15)   135.7(2) 1_555 1_555 1_555 1_555 yes
   Ru(2)   S(4)    Ti(2)   Ti(1)   36.31(5) 1_555 1_555 1_555 1_555 yes
   Ru(2)   S(4)    Ti(2)   S(1)    84.94(7) 1_555 1_555 1_555 1_555 yes
   Ru(2)   S(4)    Ti(2)   S(2)    -12.28(6) 1_555 1_555 1_555 1_555 yes
   Ru(2)   S(4)    Ti(2)   C(6)    -145.8(2) 1_555 1_555 1_555 1_555 yes
   Ru(2)   S(4)    Ti(2)   C(7)    -115.2(2) 1_555 1_555 1_555 1_555 yes
   Ru(2)   S(4)    Ti(2)   C(8)    -115.7(3) 1_555 1_555 1_555 1_555 yes
   Ru(2)   S(4)    Ti(2)   C(9)    -172.3(3) 1_555 1_555 1_555 1_555 yes
   Ru(2)   S(4)    Ti(2)   C(10)   -175.7(2) 1_555 1_555 1_555 1_555 yes
   Ru(2)   C(21)   C(22)   C(23)   -63.8(4) 1_555 1_555 1_555 1_555 yes
   Ru(2)   C(21)   C(22)   C(27)   124.4(6) 1_555 1_555 1_555 1_555 yes
   Ru(2)   C(21)   C(25)   C(24)   60.9(4)  1_555 1_555 1_555 1_555 yes
   Ru(2)   C(21)   C(25)   C(30)   -127.4(6) 1_555 1_555 1_555 1_555 yes
   Ru(2)   C(22)   C(21)   C(25)   62.9(4)  1_555 1_555 1_555 1_555 yes
   Ru(2)   C(22)   C(21)   C(26)   -123.6(6) 1_555 1_555 1_555 1_555 yes
   Ru(2)   C(22)   C(23)   C(24)   -60.7(4) 1_555 1_555 1_555 1_555 yes
   Ru(2)   C(22)   C(23)   C(28)   125.6(6) 1_555 1_555 1_555 1_555 yes
   Ru(2)   C(23)   C(22)   C(21)   63.5(4)  1_555 1_555 1_555 1_555 yes
   Ru(2)   C(23)   C(22)   C(27)   -124.7(7) 1_555 1_555 1_555 1_555 yes
   Ru(2)   C(23)   C(24)   C(25)   -64.6(4) 1_555 1_555 1_555 1_555 yes
   Ru(2)   C(23)   C(24)   C(29)   123.9(6) 1_555 1_555 1_555 1_555 yes
   Ru(2)   C(24)   C(23)   C(22)   61.0(4)  1_555 1_555 1_555 1_555 yes
   Ru(2)   C(24)   C(23)   C(28)   -125.4(6) 1_555 1_555 1_555 1_555 yes
   Ru(2)   C(24)   C(25)   C(21)   -61.6(4) 1_555 1_555 1_555 1_555 yes
   Ru(2)   C(24)   C(25)   C(30)   126.5(6) 1_555 1_555 1_555 1_555 yes
   Ru(2)   C(25)   C(21)   C(22)   -62.2(4) 1_555 1_555 1_555 1_555 yes
   Ru(2)   C(25)   C(21)   C(26)   124.4(7) 1_555 1_555 1_555 1_555 yes
   Ru(2)   C(25)   C(24)   C(23)   64.6(4)  1_555 1_555 1_555 1_555 yes
   Ru(2)   C(25)   C(24)   C(29)   -123.9(6) 1_555 1_555 1_555 1_555 yes
   Ti(1)   Ru(1)   Ru(2)   Ti(2)   72.23(4) 1_555 1_555 1_555 1_555 yes
   Ti(1)   Ru(1)   Ru(2)   S(2)    37.08(5) 1_555 1_555 1_555 1_555 yes
   Ti(1)   Ru(1)   Ru(2)   S(3)    -57.92(6) 1_555 1_555 1_555 1_555 yes
   Ti(1)   Ru(1)   Ru(2)   S(4)    129.91(6) 1_555 1_555 1_555 1_555 yes
   Ti(1)   Ru(1)   Ru(2)   C(21)   -161.3(2) 1_555 1_555 1_555 1_555 yes
   Ti(1)   Ru(1)   Ru(2)   C(22)   161.9(3) 1_555 1_555 1_555 1_555 yes
   Ti(1)   Ru(1)   Ru(2)   C(23)   173(2)   1_555 1_555 1_555 1_555 yes
   Ti(1)   Ru(1)   Ru(2)   C(24)   -85.4(3) 1_555 1_555 1_555 1_555 yes
   Ti(1)   Ru(1)   Ru(2)   C(25)   -120.3(2) 1_555 1_555 1_555 1_555 yes
   Ti(1)   Ru(1)   Ti(2)   S(1)    58.51(6) 1_555 1_555 1_555 1_555 yes
   Ti(1)   Ru(1)   Ti(2)   S(2)    -33.42(5) 1_555 1_555 1_555 1_555 yes
   Ti(1)   Ru(1)   Ti(2)   S(4)    -133.55(7) 1_555 1_555 1_555 1_555 yes
   Ti(1)   Ru(1)   Ti(2)   C(6)    173.5(2) 1_555 1_555 1_555 1_555 yes
   Ti(1)   Ru(1)   Ti(2)   C(7)    -157.2(4) 1_555 1_555 1_555 1_555 yes
   Ti(1)   Ru(1)   Ti(2)   C(8)    77.5(8)  1_555 1_555 1_555 1_555 yes
   Ti(1)   Ru(1)   Ti(2)   C(9)    97.5(3)  1_555 1_555 1_555 1_555 yes
   Ti(1)   Ru(1)   Ti(2)   C(10)   135.1(3) 1_555 1_555 1_555 1_555 yes
   Ti(1)   Ru(1)   S(1)    Ti(2)   -86.23(6) 1_555 1_555 1_555 1_555 yes
   Ti(1)   Ru(1)   S(4)    Ti(2)   40.67(6) 1_555 1_555 1_555 1_555 yes
   Ti(1)   Ru(1)   C(11)   C(12)   -58.3(5) 1_555 1_555 1_555 1_555 yes
   Ti(1)   Ru(1)   C(11)   C(15)   -175.4(3) 1_555 1_555 1_555 1_555 yes
   Ti(1)   Ru(1)   C(11)   C(16)   62.5(7)  1_555 1_555 1_555 1_555 yes
   Ti(1)   Ru(1)   C(12)   C(11)   142.5(3) 1_555 1_555 1_555 1_555 yes
   Ti(1)   Ru(1)   C(12)   C(13)   -100.8(4) 1_555 1_555 1_555 1_555 yes
   Ti(1)   Ru(1)   C(12)   C(17)   22.4(7)  1_555 1_555 1_555 1_555 yes
   Ti(1)   Ru(1)   C(13)   C(12)   96.2(4)  1_555 1_555 1_555 1_555 yes
   Ti(1)   Ru(1)   C(13)   C(14)   -145.5(4) 1_555 1_555 1_555 1_555 yes
   Ti(1)   Ru(1)   C(13)   C(18)   -24.1(7) 1_555 1_555 1_555 1_555 yes
   Ti(1)   Ru(1)   C(14)   C(13)   56.5(5)  1_555 1_555 1_555 1_555 yes
   Ti(1)   Ru(1)   C(14)   C(15)   171.7(3) 1_555 1_555 1_555 1_555 yes
   Ti(1)   Ru(1)   C(14)   C(19)   -64.6(8) 1_555 1_555 1_555 1_555 yes
   Ti(1)   Ru(1)   C(15)   C(11)   35(2)    1_555 1_555 1_555 1_555 yes
   Ti(1)   Ru(1)   C(15)   C(14)   -82(2)   1_555 1_555 1_555 1_555 yes
   Ti(1)   Ru(1)   C(15)   C(20)   159(1)   1_555 1_555 1_555 1_555 yes
   Ti(1)   Ru(2)   Ru(1)   Ti(2)   -72.23(4) 1_555 1_555 1_555 1_555 yes
   Ti(1)   Ru(2)   Ru(1)   S(1)    -35.35(5) 1_555 1_555 1_555 1_555 yes
   Ti(1)   Ru(2)   Ru(1)   S(3)    57.92(6) 1_555 1_555 1_555 1_555 yes
   Ti(1)   Ru(2)   Ru(1)   S(4)    -129.91(6) 1_555 1_555 1_555 1_555 yes
   Ti(1)   Ru(2)   Ru(1)   C(11)   134.3(2) 1_555 1_555 1_555 1_555 yes
   Ti(1)   Ru(2)   Ru(1)   C(12)   96.1(2)  1_555 1_555 1_555 1_555 yes
   Ti(1)   Ru(2)   Ru(1)   C(13)   73.4(9)  1_555 1_555 1_555 1_555 yes
   Ti(1)   Ru(2)   Ru(1)   C(14)   -151.5(4) 1_555 1_555 1_555 1_555 yes
   Ti(1)   Ru(2)   Ru(1)   C(15)   175.1(2) 1_555 1_555 1_555 1_555 yes
   Ti(1)   Ru(2)   Ti(2)   S(1)    33.55(5) 1_555 1_555 1_555 1_555 yes
   Ti(1)   Ru(2)   Ti(2)   S(2)    -59.14(6) 1_555 1_555 1_555 1_555 yes
   Ti(1)   Ru(2)   Ti(2)   S(4)    136.23(7) 1_555 1_555 1_555 1_555 yes
   Ti(1)   Ru(2)   Ti(2)   C(6)    -177.9(3) 1_555 1_555 1_555 1_555 yes
   Ti(1)   Ru(2)   Ti(2)   C(7)    -137.8(2) 1_555 1_555 1_555 1_555 yes
   Ti(1)   Ru(2)   Ti(2)   C(8)    -97.8(3) 1_555 1_555 1_555 1_555 yes
   Ti(1)   Ru(2)   Ti(2)   C(9)    -64.8(8) 1_555 1_555 1_555 1_555 yes
   Ti(1)   Ru(2)   Ti(2)   C(10)   146.5(5) 1_555 1_555 1_555 1_555 yes
   Ti(1)   Ru(2)   S(2)    Ti(2)   86.25(6) 1_555 1_555 1_555 1_555 yes
   Ti(1)   Ru(2)   S(4)    Ti(2)   -38.66(6) 1_555 1_555 1_555 1_555 yes
   Ti(1)   Ru(2)   C(21)   C(22)   142.4(5) 1_555 1_555 1_555 1_555 yes
   Ti(1)   Ru(2)   C(21)   C(25)   24.9(8)  1_555 1_555 1_555 1_555 yes
   Ti(1)   Ru(2)   C(21)   C(26)   -98.1(8) 1_555 1_555 1_555 1_555 yes
   Ti(1)   Ru(2)   C(22)   C(21)   -155.9(3) 1_555 1_555 1_555 1_555 yes
   Ti(1)   Ru(2)   C(22)   C(23)   -40.5(6) 1_555 1_555 1_555 1_555 yes
   Ti(1)   Ru(2)   C(22)   C(27)   81.9(8)  1_555 1_555 1_555 1_555 yes
   Ti(1)   Ru(2)   C(23)   C(22)   160.7(3) 1_555 1_555 1_555 1_555 yes
   Ti(1)   Ru(2)   C(23)   C(24)   -80.5(4) 1_555 1_555 1_555 1_555 yes
   Ti(1)   Ru(2)   C(23)   C(28)   41.0(7)  1_555 1_555 1_555 1_555 yes
   Ti(1)   Ru(2)   C(24)   C(23)   116.7(3) 1_555 1_555 1_555 1_555 yes
   Ti(1)   Ru(2)   C(24)   C(25)   -127.2(3) 1_555 1_555 1_555 1_555 yes
   Ti(1)   Ru(2)   C(24)   C(29)   -5.6(7)  1_555 1_555 1_555 1_555 yes
   Ti(1)   Ru(2)   C(25)   C(21)   -171.1(3) 1_555 1_555 1_555 1_555 yes
   Ti(1)   Ru(2)   C(25)   C(24)   71.3(4)  1_555 1_555 1_555 1_555 yes
   Ti(1)   Ru(2)   C(25)   C(30)   -48.6(8) 1_555 1_555 1_555 1_555 yes
   Ti(1)   Ti(2)   Ru(1)   S(1)    -58.51(6) 1_555 1_555 1_555 1_555 yes
   Ti(1)   Ti(2)   Ru(1)   S(3)    31.88(5) 1_555 1_555 1_555 1_555 yes
   Ti(1)   Ti(2)   Ru(1)   S(4)    133.55(7) 1_555 1_555 1_555 1_555 yes
   Ti(1)   Ti(2)   Ru(1)   C(11)   156.5(4) 1_555 1_555 1_555 1_555 yes
   Ti(1)   Ti(2)   Ru(1)   C(12)   -81.2(6) 1_555 1_555 1_555 1_555 yes
   Ti(1)   Ti(2)   Ru(1)   C(13)   -101.6(2) 1_555 1_555 1_555 1_555 yes
   Ti(1)   Ti(2)   Ru(1)   C(14)   -139.3(2) 1_555 1_555 1_555 1_555 yes
   Ti(1)   Ti(2)   Ru(1)   C(15)   -178.2(2) 1_555 1_555 1_555 1_555 yes
   Ti(1)   Ti(2)   Ru(2)   S(2)    59.14(6) 1_555 1_555 1_555 1_555 yes
   Ti(1)   Ti(2)   Ru(2)   S(3)    -33.66(5) 1_555 1_555 1_555 1_555 yes
   Ti(1)   Ti(2)   Ru(2)   S(4)    -136.23(7) 1_555 1_555 1_555 1_555 yes
   Ti(1)   Ti(2)   Ru(2)   C(21)   -170.8(2) 1_555 1_555 1_555 1_555 yes
   Ti(1)   Ti(2)   Ru(2)   C(22)   152.5(2) 1_555 1_555 1_555 1_555 yes
   Ti(1)   Ti(2)   Ru(2)   C(23)   112.4(2) 1_555 1_555 1_555 1_555 yes
   Ti(1)   Ti(2)   Ru(2)   C(24)   81.8(3)  1_555 1_555 1_555 1_555 yes
   Ti(1)   Ti(2)   Ru(2)   C(25)   -157.8(8) 1_555 1_555 1_555 1_555 yes
   Ti(1)   Ti(2)   C(6)    C(7)    -78(1)   1_555 1_555 1_555 1_555 yes
   Ti(1)   Ti(2)   C(6)    C(10)   39(2)    1_555 1_555 1_555 1_555 yes
   Ti(1)   Ti(2)   C(7)    C(6)    168.9(4) 1_555 1_555 1_555 1_555 yes
   Ti(1)   Ti(2)   C(7)    C(8)    53.5(6)  1_555 1_555 1_555 1_555 yes
   Ti(1)   Ti(2)   C(8)    C(7)    -147.7(4) 1_555 1_555 1_555 1_555 yes
   Ti(1)   Ti(2)   C(8)    C(9)    96.5(5)  1_555 1_555 1_555 1_555 yes
   Ti(1)   Ti(2)   C(9)    C(8)    -101.2(5) 1_555 1_555 1_555 1_555 yes
   Ti(1)   Ti(2)   C(9)    C(10)   142.6(4) 1_555 1_555 1_555 1_555 yes
   Ti(1)   Ti(2)   C(10)   C(6)    -173.3(4) 1_555 1_555 1_555 1_555 yes
   Ti(1)   Ti(2)   C(10)   C(9)    -58.8(6) 1_555 1_555 1_555 1_555 yes
   Ti(1)   S(1)    Ru(1)   Ti(2)   86.23(6) 1_555 1_555 1_555 1_555 yes
   Ti(1)   S(1)    Ru(1)   S(3)    -11.19(6) 1_555 1_555 1_555 1_555 yes
   Ti(1)   S(1)    Ru(1)   S(4)    95.38(6) 1_555 1_555 1_555 1_555 yes
   Ti(1)   S(1)    Ru(1)   C(11)   -120.0(3) 1_555 1_555 1_555 1_555 yes
   Ti(1)   S(1)    Ru(1)   C(12)   -101.2(2) 1_555 1_555 1_555 1_555 yes
   Ti(1)   S(1)    Ru(1)   C(13)   -126.9(2) 1_555 1_555 1_555 1_555 yes
   Ti(1)   S(1)    Ru(1)   C(14)   -163.2(2) 1_555 1_555 1_555 1_555 yes
   Ti(1)   S(1)    Ru(1)   C(15)   -173.3(2) 1_555 1_555 1_555 1_555 yes
   Ti(1)   S(1)    Ti(2)   S(2)    13.08(7) 1_555 1_555 1_555 1_555 yes
   Ti(1)   S(1)    Ti(2)   S(4)    -89.25(7) 1_555 1_555 1_555 1_555 yes
   Ti(1)   S(1)    Ti(2)   C(6)    172.4(2) 1_555 1_555 1_555 1_555 yes
   Ti(1)   S(1)    Ti(2)   C(7)    127.3(4) 1_555 1_555 1_555 1_555 yes
   Ti(1)   S(1)    Ti(2)   C(8)    105.1(2) 1_555 1_555 1_555 1_555 yes
   Ti(1)   S(1)    Ti(2)   C(9)    127.7(3) 1_555 1_555 1_555 1_555 yes
   Ti(1)   S(1)    Ti(2)   C(10)   162.6(2) 1_555 1_555 1_555 1_555 yes
   Ti(1)   S(2)    Ru(2)   Ti(2)   -86.25(6) 1_555 1_555 1_555 1_555 yes
   Ti(1)   S(2)    Ru(2)   S(3)    9.21(6)  1_555 1_555 1_555 1_555 yes
   Ti(1)   S(2)    Ru(2)   S(4)    -97.77(6) 1_555 1_555 1_555 1_555 yes
   Ti(1)   S(2)    Ru(2)   C(21)   164.0(3) 1_555 1_555 1_555 1_555 yes
   Ti(1)   S(2)    Ru(2)   C(22)   169.5(2) 1_555 1_555 1_555 1_555 yes
   Ti(1)   S(2)    Ru(2)   C(23)   138.2(2) 1_555 1_555 1_555 1_555 yes
   Ti(1)   S(2)    Ru(2)   C(24)   105.2(2) 1_555 1_555 1_555 1_555 yes
   Ti(1)   S(2)    Ru(2)   C(25)   104.0(3) 1_555 1_555 1_555 1_555 yes
   Ti(1)   S(2)    Ti(2)   S(1)    -13.09(7) 1_555 1_555 1_555 1_555 yes
   Ti(1)   S(2)    Ti(2)   S(4)    90.41(7) 1_555 1_555 1_555 1_555 yes
   Ti(1)   S(2)    Ti(2)   C(6)    -171.0(3) 1_555 1_555 1_555 1_555 yes
   Ti(1)   S(2)    Ti(2)   C(7)    -162.0(2) 1_555 1_555 1_555 1_555 yes
   Ti(1)   S(2)    Ti(2)   C(8)    -127.9(2) 1_555 1_555 1_555 1_555 yes
   Ti(1)   S(2)    Ti(2)   C(9)    -103.0(2) 1_555 1_555 1_555 1_555 yes
   Ti(1)   S(2)    Ti(2)   C(10)   -120.6(4) 1_555 1_555 1_555 1_555 yes
   Ti(1)   S(3)    Ru(1)   Ti(2)   -38.73(5) 1_555 1_555 1_555 1_555 yes
   Ti(1)   S(3)    Ru(1)   S(1)    11.34(6) 1_555 1_555 1_555 1_555 yes
   Ti(1)   S(3)    Ru(1)   S(4)    -88.69(6) 1_555 1_555 1_555 1_555 yes
   Ti(1)   S(3)    Ru(1)   C(11)   161.0(2) 1_555 1_555 1_555 1_555 yes
   Ti(1)   S(3)    Ru(1)   C(12)   124.8(2) 1_555 1_555 1_555 1_555 yes
   Ti(1)   S(3)    Ru(1)   C(13)   101.3(2) 1_555 1_555 1_555 1_555 yes
   Ti(1)   S(3)    Ru(1)   C(14)   124.8(4) 1_555 1_555 1_555 1_555 yes
   Ti(1)   S(3)    Ru(1)   C(15)   174.2(2) 1_555 1_555 1_555 1_555 yes
   Ti(1)   S(3)    Ru(2)   Ti(2)   40.61(5) 1_555 1_555 1_555 1_555 yes
   Ti(1)   S(3)    Ru(2)   S(2)    -9.31(6) 1_555 1_555 1_555 1_555 yes
   Ti(1)   S(3)    Ru(2)   S(4)    89.99(6) 1_555 1_555 1_555 1_555 yes
   Ti(1)   S(3)    Ru(2)   C(21)   -172.9(2) 1_555 1_555 1_555 1_555 yes
   Ti(1)   S(3)    Ru(2)   C(22)   -150.5(3) 1_555 1_555 1_555 1_555 yes
   Ti(1)   S(3)    Ru(2)   C(23)   -100.4(2) 1_555 1_555 1_555 1_555 yes
   Ti(1)   S(3)    Ru(2)   C(24)   -112.2(2) 1_555 1_555 1_555 1_555 yes
   Ti(1)   S(3)    Ru(2)   C(25)   -148.6(2) 1_555 1_555 1_555 1_555 yes
   Ti(1)   C(1)    C(2)    C(3)    63.6(6)  1_555 1_555 1_555 1_555 yes
   Ti(1)   C(1)    C(5)    C(4)    -63.8(6) 1_555 1_555 1_555 1_555 yes
   Ti(1)   C(2)    C(1)    C(5)    -64.7(6) 1_555 1_555 1_555 1_555 yes
   Ti(1)   C(2)    C(3)    C(4)    65.0(6)  1_555 1_555 1_555 1_555 yes
   Ti(1)   C(3)    C(2)    C(1)    -64.1(6) 1_555 1_555 1_555 1_555 yes
   Ti(1)   C(3)    C(4)    C(5)    65.2(6)  1_555 1_555 1_555 1_555 yes
   Ti(1)   C(4)    C(3)    C(2)    -65.5(6) 1_555 1_555 1_555 1_555 yes
   Ti(1)   C(4)    C(5)    C(1)    64.0(6)  1_555 1_555 1_555 1_555 yes
   Ti(1)   C(5)    C(1)    C(2)    64.7(6)  1_555 1_555 1_555 1_555 yes
   Ti(1)   C(5)    C(4)    C(3)    -64.4(5) 1_555 1_555 1_555 1_555 yes
   Ti(2)   Ru(1)   Ru(2)   S(2)    -35.15(5) 1_555 1_555 1_555 1_555 yes
   Ti(2)   Ru(1)   Ru(2)   S(3)    -130.15(6) 1_555 1_555 1_555 1_555 yes
   Ti(2)   Ru(1)   Ru(2)   S(4)    57.68(6) 1_555 1_555 1_555 1_555 yes
   Ti(2)   Ru(1)   Ru(2)   C(21)   126.5(2) 1_555 1_555 1_555 1_555 yes
   Ti(2)   Ru(1)   Ru(2)   C(22)   89.7(3)  1_555 1_555 1_555 1_555 yes
   Ti(2)   Ru(1)   Ru(2)   C(23)   101(2)   1_555 1_555 1_555 1_555 yes
   Ti(2)   Ru(1)   Ru(2)   C(24)   -157.6(3) 1_555 1_555 1_555 1_555 yes
   Ti(2)   Ru(1)   Ru(2)   C(25)   167.5(2) 1_555 1_555 1_555 1_555 yes
   Ti(2)   Ru(1)   Ti(1)   S(1)    -58.86(6) 1_555 1_555 1_555 1_555 yes
   Ti(2)   Ru(1)   Ti(1)   S(2)    33.38(5) 1_555 1_555 1_555 1_555 yes
   Ti(2)   Ru(1)   Ti(1)   S(3)    136.05(6) 1_555 1_555 1_555 1_555 yes
   Ti(2)   Ru(1)   Ti(1)   C(1)    -90.6(3) 1_555 1_555 1_555 1_555 yes
   Ti(2)   Ru(1)   Ti(1)   C(2)    -70(1)   1_555 1_555 1_555 1_555 yes
   Ti(2)   Ru(1)   Ti(1)   C(3)    156.2(4) 1_555 1_555 1_555 1_555 yes
   Ti(2)   Ru(1)   Ti(1)   C(4)    -167.8(3) 1_555 1_555 1_555 1_555 yes
   Ti(2)   Ru(1)   Ti(1)   C(5)    -127.4(3) 1_555 1_555 1_555 1_555 yes
   Ti(2)   Ru(1)   C(11)   C(12)   154.3(4) 1_555 1_555 1_555 1_555 yes
   Ti(2)   Ru(1)   C(11)   C(15)   37.1(6)  1_555 1_555 1_555 1_555 yes
   Ti(2)   Ru(1)   C(11)   C(16)   -84.9(8) 1_555 1_555 1_555 1_555 yes
   Ti(2)   Ru(1)   C(12)   C(11)   -144.7(5) 1_555 1_555 1_555 1_555 yes
   Ti(2)   Ru(1)   C(12)   C(13)   -28.0(8) 1_555 1_555 1_555 1_555 yes
   Ti(2)   Ru(1)   C(12)   C(17)   95.2(8)  1_555 1_555 1_555 1_555 yes
   Ti(2)   Ru(1)   C(13)   C(12)   169.6(3) 1_555 1_555 1_555 1_555 yes
   Ti(2)   Ru(1)   C(13)   C(14)   -72.1(4) 1_555 1_555 1_555 1_555 yes
   Ti(2)   Ru(1)   C(13)   C(18)   49.3(7)  1_555 1_555 1_555 1_555 yes
   Ti(2)   Ru(1)   C(14)   C(13)   126.5(4) 1_555 1_555 1_555 1_555 yes
   Ti(2)   Ru(1)   C(14)   C(15)   -118.4(4) 1_555 1_555 1_555 1_555 yes
   Ti(2)   Ru(1)   C(14)   C(19)   5.4(7)   1_555 1_555 1_555 1_555 yes
   Ti(2)   Ru(1)   C(15)   C(11)   -163.0(3) 1_555 1_555 1_555 1_555 yes
   Ti(2)   Ru(1)   C(15)   C(14)   79.2(4)  1_555 1_555 1_555 1_555 yes
   Ti(2)   Ru(1)   C(15)   C(20)   -39.3(7) 1_555 1_555 1_555 1_555 yes
   Ti(2)   Ru(2)   Ru(1)   S(1)    36.88(5) 1_555 1_555 1_555 1_555 yes
   Ti(2)   Ru(2)   Ru(1)   S(3)    130.15(6) 1_555 1_555 1_555 1_555 yes
   Ti(2)   Ru(2)   Ru(1)   S(4)    -57.68(6) 1_555 1_555 1_555 1_555 yes
   Ti(2)   Ru(2)   Ru(1)   C(11)   -153.5(2) 1_555 1_555 1_555 1_555 yes
   Ti(2)   Ru(2)   Ru(1)   C(12)   168.3(2) 1_555 1_555 1_555 1_555 yes
   Ti(2)   Ru(2)   Ru(1)   C(13)   145.6(9) 1_555 1_555 1_555 1_555 yes
   Ti(2)   Ru(2)   Ru(1)   C(14)   -79.3(4) 1_555 1_555 1_555 1_555 yes
   Ti(2)   Ru(2)   Ru(1)   C(15)   -112.7(2) 1_555 1_555 1_555 1_555 yes
   Ti(2)   Ru(2)   Ti(1)   S(1)    -33.48(5) 1_555 1_555 1_555 1_555 yes
   Ti(2)   Ru(2)   Ti(1)   S(2)    58.32(6) 1_555 1_555 1_555 1_555 yes
   Ti(2)   Ru(2)   Ti(1)   S(3)    -133.76(6) 1_555 1_555 1_555 1_555 yes
   Ti(2)   Ru(2)   Ti(1)   C(1)    75.7(6)  1_555 1_555 1_555 1_555 yes
   Ti(2)   Ru(2)   Ti(1)   C(2)    104.2(3) 1_555 1_555 1_555 1_555 yes
   Ti(2)   Ru(2)   Ti(1)   C(3)    143.0(3) 1_555 1_555 1_555 1_555 yes
   Ti(2)   Ru(2)   Ti(1)   C(4)    -177.1(3) 1_555 1_555 1_555 1_555 yes
   Ti(2)   Ru(2)   Ti(1)   C(5)    -150.2(7) 1_555 1_555 1_555 1_555 yes
   Ti(2)   Ru(2)   C(21)   C(22)   -66.6(4) 1_555 1_555 1_555 1_555 yes
   Ti(2)   Ru(2)   C(21)   C(25)   175.8(3) 1_555 1_555 1_555 1_555 yes
   Ti(2)   Ru(2)   C(21)   C(26)   52.9(8)  1_555 1_555 1_555 1_555 yes
   Ti(2)   Ru(2)   C(22)   C(21)   133.5(3) 1_555 1_555 1_555 1_555 yes
   Ti(2)   Ru(2)   C(22)   C(23)   -111.1(4) 1_555 1_555 1_555 1_555 yes
   Ti(2)   Ru(2)   C(22)   C(27)   11.3(7)  1_555 1_555 1_555 1_555 yes
   Ti(2)   Ru(2)   C(23)   C(22)   86.6(4)  1_555 1_555 1_555 1_555 yes
   Ti(2)   Ru(2)   C(23)   C(24)   -154.6(3) 1_555 1_555 1_555 1_555 yes
   Ti(2)   Ru(2)   C(23)   C(28)   -33.1(7) 1_555 1_555 1_555 1_555 yes
   Ti(2)   Ru(2)   C(24)   C(23)   47.8(5)  1_555 1_555 1_555 1_555 yes
   Ti(2)   Ru(2)   C(24)   C(25)   163.9(3) 1_555 1_555 1_555 1_555 yes
   Ti(2)   Ru(2)   C(24)   C(29)   -74.5(8) 1_555 1_555 1_555 1_555 yes
   Ti(2)   Ru(2)   C(25)   C(21)   -16(1)   1_555 1_555 1_555 1_555 yes
   Ti(2)   Ru(2)   C(25)   C(24)   -133.8(8) 1_555 1_555 1_555 1_555 yes
   Ti(2)   Ru(2)   C(25)   C(30)   106.3(9) 1_555 1_555 1_555 1_555 yes
   Ti(2)   Ti(1)   Ru(1)   S(1)    58.86(6) 1_555 1_555 1_555 1_555 yes
   Ti(2)   Ti(1)   Ru(1)   S(3)    -136.05(6) 1_555 1_555 1_555 1_555 yes
   Ti(2)   Ti(1)   Ru(1)   S(4)    -33.60(5) 1_555 1_555 1_555 1_555 yes
   Ti(2)   Ti(1)   Ru(1)   C(11)   -165.6(3) 1_555 1_555 1_555 1_555 yes
   Ti(2)   Ti(1)   Ru(1)   C(12)   160.7(2) 1_555 1_555 1_555 1_555 yes
   Ti(2)   Ti(1)   Ru(1)   C(13)   120.6(2) 1_555 1_555 1_555 1_555 yes
   Ti(2)   Ti(1)   Ru(1)   C(14)   86.7(3)  1_555 1_555 1_555 1_555 yes
   Ti(2)   Ti(1)   Ru(1)   C(15)   162(1)   1_555 1_555 1_555 1_555 yes
   Ti(2)   Ti(1)   Ru(2)   S(2)    -58.32(6) 1_555 1_555 1_555 1_555 yes
   Ti(2)   Ti(1)   Ru(2)   S(3)    133.76(6) 1_555 1_555 1_555 1_555 yes
   Ti(2)   Ti(1)   Ru(2)   S(4)    31.75(5) 1_555 1_555 1_555 1_555 yes
   Ti(2)   Ti(1)   Ru(2)   C(21)   156.2(6) 1_555 1_555 1_555 1_555 yes
   Ti(2)   Ti(1)   Ru(2)   C(22)   -82.1(4) 1_555 1_555 1_555 1_555 yes
   Ti(2)   Ti(1)   Ru(2)   C(23)   -109.3(2) 1_555 1_555 1_555 1_555 yes
   Ti(2)   Ti(1)   Ru(2)   C(24)   -148.0(2) 1_555 1_555 1_555 1_555 yes
   Ti(2)   Ti(1)   Ru(2)   C(25)   174.7(2) 1_555 1_555 1_555 1_555 yes
   Ti(2)   Ti(1)   C(1)    C(2)    107.1(6) 1_555 1_555 1_555 1_555 yes
   Ti(2)   Ti(1)   C(1)    C(5)    -136.3(5) 1_555 1_555 1_555 1_555 yes
   Ti(2)   Ti(1)   C(2)    C(1)    -90.2(6) 1_555 1_555 1_555 1_555 yes
   Ti(2)   Ti(1)   C(2)    C(3)    152.4(5) 1_555 1_555 1_555 1_555 yes
   Ti(2)   Ti(1)   C(3)    C(2)    -48.6(7) 1_555 1_555 1_555 1_555 yes
   Ti(2)   Ti(1)   C(3)    C(4)    -162.4(4) 1_555 1_555 1_555 1_555 yes
   Ti(2)   Ti(1)   C(4)    C(3)    115(1)   1_555 1_555 1_555 1_555 yes
   Ti(2)   Ti(1)   C(4)    C(5)    0(1)     1_555 1_555 1_555 1_555 yes
   Ti(2)   Ti(1)   C(5)    C(1)    63.4(6)  1_555 1_555 1_555 1_555 yes
   Ti(2)   Ti(1)   C(5)    C(4)    -179.9(4) 1_555 1_555 1_555 1_555 yes
   Ti(2)   S(1)    Ru(1)   S(3)    -97.43(6) 1_555 1_555 1_555 1_555 yes
   Ti(2)   S(1)    Ru(1)   S(4)    9.15(6)  1_555 1_555 1_555 1_555 yes
   Ti(2)   S(1)    Ru(1)   C(11)   153.7(3) 1_555 1_555 1_555 1_555 yes
   Ti(2)   S(1)    Ru(1)   C(12)   172.6(2) 1_555 1_555 1_555 1_555 yes
   Ti(2)   S(1)    Ru(1)   C(13)   146.9(2) 1_555 1_555 1_555 1_555 yes
   Ti(2)   S(1)    Ru(1)   C(14)   110.6(2) 1_555 1_555 1_555 1_555 yes
   Ti(2)   S(1)    Ru(1)   C(15)   100.5(2) 1_555 1_555 1_555 1_555 yes
   Ti(2)   S(1)    Ti(1)   S(2)    -13.07(7) 1_555 1_555 1_555 1_555 yes
   Ti(2)   S(1)    Ti(1)   S(3)    90.55(7) 1_555 1_555 1_555 1_555 yes
   Ti(2)   S(1)    Ti(1)   C(1)    -121.1(2) 1_555 1_555 1_555 1_555 yes
   Ti(2)   S(1)    Ti(1)   C(2)    -102.8(2) 1_555 1_555 1_555 1_555 yes
   Ti(2)   S(1)    Ti(1)   C(3)    -134.2(6) 1_555 1_555 1_555 1_555 yes
   Ti(2)   S(1)    Ti(1)   C(4)    -172.8(3) 1_555 1_555 1_555 1_555 yes
   Ti(2)   S(1)    Ti(1)   C(5)    -155.5(2) 1_555 1_555 1_555 1_555 yes
   Ti(2)   S(2)    Ru(2)   S(3)    95.46(6) 1_555 1_555 1_555 1_555 yes
   Ti(2)   S(2)    Ru(2)   S(4)    -11.52(6) 1_555 1_555 1_555 1_555 yes
   Ti(2)   S(2)    Ru(2)   C(21)   -109.8(3) 1_555 1_555 1_555 1_555 yes
   Ti(2)   S(2)    Ru(2)   C(22)   -104.3(2) 1_555 1_555 1_555 1_555 yes
   Ti(2)   S(2)    Ru(2)   C(23)   -135.5(2) 1_555 1_555 1_555 1_555 yes
   Ti(2)   S(2)    Ru(2)   C(24)   -168.5(2) 1_555 1_555 1_555 1_555 yes
   Ti(2)   S(2)    Ru(2)   C(25)   -169.7(3) 1_555 1_555 1_555 1_555 yes
   Ti(2)   S(2)    Ti(1)   S(1)    13.05(7) 1_555 1_555 1_555 1_555 yes
   Ti(2)   S(2)    Ti(1)   S(3)    -89.29(7) 1_555 1_555 1_555 1_555 yes
   Ti(2)   S(2)    Ti(1)   C(1)    106.5(2) 1_555 1_555 1_555 1_555 yes
   Ti(2)   S(2)    Ti(1)   C(2)    134.1(3) 1_555 1_555 1_555 1_555 yes
   Ti(2)   S(2)    Ti(1)   C(3)    166.1(3) 1_555 1_555 1_555 1_555 yes
   Ti(2)   S(2)    Ti(1)   C(4)    167.6(3) 1_555 1_555 1_555 1_555 yes
   Ti(2)   S(2)    Ti(1)   C(5)    113.3(4) 1_555 1_555 1_555 1_555 yes
   Ti(2)   S(4)    Ru(1)   S(1)    -9.24(6) 1_555 1_555 1_555 1_555 yes
   Ti(2)   S(4)    Ru(1)   S(3)    90.02(7) 1_555 1_555 1_555 1_555 yes
   Ti(2)   S(4)    Ru(1)   C(11)   -170.3(2) 1_555 1_555 1_555 1_555 yes
   Ti(2)   S(4)    Ru(1)   C(12)   -162.4(3) 1_555 1_555 1_555 1_555 yes
   Ti(2)   S(4)    Ru(1)   C(13)   -103.4(3) 1_555 1_555 1_555 1_555 yes
   Ti(2)   S(4)    Ru(1)   C(14)   -106.6(2) 1_555 1_555 1_555 1_555 yes
   Ti(2)   S(4)    Ru(1)   C(15)   -140.8(2) 1_555 1_555 1_555 1_555 yes
   Ti(2)   S(4)    Ru(2)   S(2)    11.66(6) 1_555 1_555 1_555 1_555 yes
   Ti(2)   S(4)    Ru(2)   S(3)    -88.92(7) 1_555 1_555 1_555 1_555 yes
   Ti(2)   S(4)    Ru(2)   C(21)   155.3(2) 1_555 1_555 1_555 1_555 yes
   Ti(2)   S(4)    Ru(2)   C(22)   117.9(2) 1_555 1_555 1_555 1_555 yes
   Ti(2)   S(4)    Ru(2)   C(23)   100.8(2) 1_555 1_555 1_555 1_555 yes
   Ti(2)   S(4)    Ru(2)   C(24)   140.9(4) 1_555 1_555 1_555 1_555 yes
   Ti(2)   S(4)    Ru(2)   C(25)   175.2(2) 1_555 1_555 1_555 1_555 yes
   Ti(2)   C(6)    C(7)    C(8)    64.9(5)  1_555 1_555 1_555 1_555 yes
   Ti(2)   C(6)    C(10)   C(9)    -64.1(5) 1_555 1_555 1_555 1_555 yes
   Ti(2)   C(7)    C(6)    C(10)   -63.1(5) 1_555 1_555 1_555 1_555 yes
   Ti(2)   C(7)    C(8)    C(9)    64.4(5)  1_555 1_555 1_555 1_555 yes
   Ti(2)   C(8)    C(7)    C(6)    -65.8(5) 1_555 1_555 1_555 1_555 yes
   Ti(2)   C(8)    C(9)    C(10)   64.8(5)  1_555 1_555 1_555 1_555 yes
   Ti(2)   C(9)    C(8)    C(7)    -64.3(5) 1_555 1_555 1_555 1_555 yes
   Ti(2)   C(9)    C(10)   C(6)    65.2(5)  1_555 1_555 1_555 1_555 yes
   Ti(2)   C(10)   C(6)    C(7)    62.7(5)  1_555 1_555 1_555 1_555 yes
   Ti(2)   C(10)   C(9)    C(8)    -64.7(5) 1_555 1_555 1_555 1_555 yes
   S(1)    Ru(1)   Ru(2)   S(2)    1.73(6)  1_555 1_555 1_555 1_555 yes
   S(1)    Ru(1)   Ru(2)   S(3)    -93.27(7) 1_555 1_555 1_555 1_555 yes
   S(1)    Ru(1)   Ru(2)   S(4)    94.57(7) 1_555 1_555 1_555 1_555 yes
   S(1)    Ru(1)   Ru(2)   C(21)   163.4(2) 1_555 1_555 1_555 1_555 yes
   S(1)    Ru(1)   Ru(2)   C(22)   126.6(3) 1_555 1_555 1_555 1_555 yes
   S(1)    Ru(1)   Ru(2)   C(23)   138(2)   1_555 1_555 1_555 1_555 yes
   S(1)    Ru(1)   Ru(2)   C(24)   -120.7(3) 1_555 1_555 1_555 1_555 yes
   S(1)    Ru(1)   Ru(2)   C(25)   -155.7(2) 1_555 1_555 1_555 1_555 yes
   S(1)    Ru(1)   Ti(1)   S(2)    92.23(7) 1_555 1_555 1_555 1_555 yes
   S(1)    Ru(1)   Ti(1)   S(3)    -165.09(8) 1_555 1_555 1_555 1_555 yes
   S(1)    Ru(1)   Ti(1)   C(1)    -31.8(3) 1_555 1_555 1_555 1_555 yes
   S(1)    Ru(1)   Ti(1)   C(2)    -11(1)   1_555 1_555 1_555 1_555 yes
   S(1)    Ru(1)   Ti(1)   C(3)    -145.0(4) 1_555 1_555 1_555 1_555 yes
   S(1)    Ru(1)   Ti(1)   C(4)    -109.0(3) 1_555 1_555 1_555 1_555 yes
   S(1)    Ru(1)   Ti(1)   C(5)    -68.5(3) 1_555 1_555 1_555 1_555 yes
   S(1)    Ru(1)   Ti(2)   S(2)    -91.93(7) 1_555 1_555 1_555 1_555 yes
   S(1)    Ru(1)   Ti(2)   S(4)    167.94(8) 1_555 1_555 1_555 1_555 yes
   S(1)    Ru(1)   Ti(2)   C(6)    115.0(2) 1_555 1_555 1_555 1_555 yes
   S(1)    Ru(1)   Ti(2)   C(7)    144.3(4) 1_555 1_555 1_555 1_555 yes
   S(1)    Ru(1)   Ti(2)   C(8)    19.0(8)  1_555 1_555 1_555 1_555 yes
   S(1)    Ru(1)   Ti(2)   C(9)    39.0(3)  1_555 1_555 1_555 1_555 yes
   S(1)    Ru(1)   Ti(2)   C(10)   76.6(3)  1_555 1_555 1_555 1_555 yes
   S(1)    Ru(1)   C(11)   C(12)   29.6(6)  1_555 1_555 1_555 1_555 yes
   S(1)    Ru(1)   C(11)   C(15)   -87.6(5) 1_555 1_555 1_555 1_555 yes
   S(1)    Ru(1)   C(11)   C(16)   150.3(5) 1_555 1_555 1_555 1_555 yes
   S(1)    Ru(1)   C(12)   C(11)   -163.4(3) 1_555 1_555 1_555 1_555 yes
   S(1)    Ru(1)   C(12)   C(13)   -46.6(4) 1_555 1_555 1_555 1_555 yes
   S(1)    Ru(1)   C(12)   C(17)   76.5(7)  1_555 1_555 1_555 1_555 yes
   S(1)    Ru(1)   C(13)   C(12)   138.2(4) 1_555 1_555 1_555 1_555 yes
   S(1)    Ru(1)   C(13)   C(14)   -103.5(4) 1_555 1_555 1_555 1_555 yes
   S(1)    Ru(1)   C(13)   C(18)   17.9(7)  1_555 1_555 1_555 1_555 yes
   S(1)    Ru(1)   C(14)   C(13)   77.4(4)  1_555 1_555 1_555 1_555 yes
   S(1)    Ru(1)   C(14)   C(15)   -167.4(4) 1_555 1_555 1_555 1_555 yes
   S(1)    Ru(1)   C(14)   C(19)   -43.7(7) 1_555 1_555 1_555 1_555 yes
   S(1)    Ru(1)   C(15)   C(11)   134.7(3) 1_555 1_555 1_555 1_555 yes
   S(1)    Ru(1)   C(15)   C(14)   16.8(5)  1_555 1_555 1_555 1_555 yes
   S(1)    Ru(1)   C(15)   C(20)   -101.7(6) 1_555 1_555 1_555 1_555 yes
   S(1)    Ti(1)   Ru(1)   S(3)    165.09(8) 1_555 1_555 1_555 1_555 yes
   S(1)    Ti(1)   Ru(1)   S(4)    -92.46(7) 1_555 1_555 1_555 1_555 yes
   S(1)    Ti(1)   Ru(1)   C(11)   135.5(3) 1_555 1_555 1_555 1_555 yes
   S(1)    Ti(1)   Ru(1)   C(12)   101.8(2) 1_555 1_555 1_555 1_555 yes
   S(1)    Ti(1)   Ru(1)   C(13)   61.7(2)  1_555 1_555 1_555 1_555 yes
   S(1)    Ti(1)   Ru(1)   C(14)   27.9(3)  1_555 1_555 1_555 1_555 yes
   S(1)    Ti(1)   Ru(1)   C(15)   103(1)   1_555 1_555 1_555 1_555 yes
   S(1)    Ti(1)   Ru(2)   S(2)    -91.80(8) 1_555 1_555 1_555 1_555 yes
   S(1)    Ti(1)   Ru(2)   S(3)    100.28(8) 1_555 1_555 1_555 1_555 yes
   S(1)    Ti(1)   Ru(2)   S(4)    -1.73(7) 1_555 1_555 1_555 1_555 yes
   S(1)    Ti(1)   Ru(2)   C(21)   122.7(6) 1_555 1_555 1_555 1_555 yes
   S(1)    Ti(1)   Ru(2)   C(22)   -115.5(4) 1_555 1_555 1_555 1_555 yes
   S(1)    Ti(1)   Ru(2)   C(23)   -142.8(2) 1_555 1_555 1_555 1_555 yes
   S(1)    Ti(1)   Ru(2)   C(24)   178.5(2) 1_555 1_555 1_555 1_555 yes
   S(1)    Ti(1)   Ru(2)   C(25)   141.2(2) 1_555 1_555 1_555 1_555 yes
   S(1)    Ti(1)   Ti(2)   S(2)    -162.33(9) 1_555 1_555 1_555 1_555 yes
   S(1)    Ti(1)   Ti(2)   S(4)    99.71(8) 1_555 1_555 1_555 1_555 yes
   S(1)    Ti(1)   Ti(2)   C(6)    -62(1)   1_555 1_555 1_555 1_555 yes
   S(1)    Ti(1)   Ti(2)   C(7)    -131.3(3) 1_555 1_555 1_555 1_555 yes
   S(1)    Ti(1)   Ti(2)   C(8)    -99.9(2) 1_555 1_555 1_555 1_555 yes
   S(1)    Ti(1)   Ti(2)   C(9)    -61.2(3) 1_555 1_555 1_555 1_555 yes
   S(1)    Ti(1)   Ti(2)   C(10)   -27.7(3) 1_555 1_555 1_555 1_555 yes
   S(1)    Ti(1)   C(1)    C(2)    151.1(6) 1_555 1_555 1_555 1_555 yes
   S(1)    Ti(1)   C(1)    C(5)    -92.2(5) 1_555 1_555 1_555 1_555 yes
   S(1)    Ti(1)   C(2)    C(1)    -34.3(7) 1_555 1_555 1_555 1_555 yes
   S(1)    Ti(1)   C(2)    C(3)    -151.7(5) 1_555 1_555 1_555 1_555 yes
   S(1)    Ti(1)   C(3)    C(2)    51.5(9)  1_555 1_555 1_555 1_555 yes
   S(1)    Ti(1)   C(3)    C(4)    -62.4(9) 1_555 1_555 1_555 1_555 yes
   S(1)    Ti(1)   C(4)    C(3)    146.5(5) 1_555 1_555 1_555 1_555 yes
   S(1)    Ti(1)   C(4)    C(5)    31.5(6)  1_555 1_555 1_555 1_555 yes
   S(1)    Ti(1)   C(5)    C(1)    89.3(5)  1_555 1_555 1_555 1_555 yes
   S(1)    Ti(1)   C(5)    C(4)    -154.1(5) 1_555 1_555 1_555 1_555 yes
   S(1)    Ti(2)   Ru(1)   S(3)    90.39(7) 1_555 1_555 1_555 1_555 yes
   S(1)    Ti(2)   Ru(1)   S(4)    -167.94(8) 1_555 1_555 1_555 1_555 yes
   S(1)    Ti(2)   Ru(1)   C(11)   -145.0(4) 1_555 1_555 1_555 1_555 yes
   S(1)    Ti(2)   Ru(1)   C(12)   -22.7(6) 1_555 1_555 1_555 1_555 yes
   S(1)    Ti(2)   Ru(1)   C(13)   -43.1(2) 1_555 1_555 1_555 1_555 yes
   S(1)    Ti(2)   Ru(1)   C(14)   -80.8(2) 1_555 1_555 1_555 1_555 yes
   S(1)    Ti(2)   Ru(1)   C(15)   -119.7(2) 1_555 1_555 1_555 1_555 yes
   S(1)    Ti(2)   Ru(2)   S(2)    92.69(7) 1_555 1_555 1_555 1_555 yes
   S(1)    Ti(2)   Ru(2)   S(3)    -0.11(7) 1_555 1_555 1_555 1_555 yes
   S(1)    Ti(2)   Ru(2)   S(4)    -102.68(8) 1_555 1_555 1_555 1_555 yes
   S(1)    Ti(2)   Ru(2)   C(21)   -137.3(2) 1_555 1_555 1_555 1_555 yes
   S(1)    Ti(2)   Ru(2)   C(22)   -174.0(2) 1_555 1_555 1_555 1_555 yes
   S(1)    Ti(2)   Ru(2)   C(23)   145.9(2) 1_555 1_555 1_555 1_555 yes
   S(1)    Ti(2)   Ru(2)   C(24)   115.4(3) 1_555 1_555 1_555 1_555 yes
   S(1)    Ti(2)   Ru(2)   C(25)   -124.3(8) 1_555 1_555 1_555 1_555 yes
   S(1)    Ti(2)   Ti(1)   S(2)    162.33(9) 1_555 1_555 1_555 1_555 yes
   S(1)    Ti(2)   Ti(1)   S(3)    -97.87(8) 1_555 1_555 1_555 1_555 yes
   S(1)    Ti(2)   Ti(1)   C(1)    69.4(3)  1_555 1_555 1_555 1_555 yes
   S(1)    Ti(2)   Ti(1)   C(2)    107.1(3) 1_555 1_555 1_555 1_555 yes
   S(1)    Ti(2)   Ti(1)   C(3)    136.5(4) 1_555 1_555 1_555 1_555 yes
   S(1)    Ti(2)   Ti(1)   C(4)    35(1)    1_555 1_555 1_555 1_555 yes
   S(1)    Ti(2)   Ti(1)   C(5)    35.9(3)  1_555 1_555 1_555 1_555 yes
   S(1)    Ti(2)   C(6)    C(7)    -135.5(4) 1_555 1_555 1_555 1_555 yes
   S(1)    Ti(2)   C(6)    C(10)   -17.5(6) 1_555 1_555 1_555 1_555 yes
   S(1)    Ti(2)   C(7)    C(6)    78.8(6)  1_555 1_555 1_555 1_555 yes
   S(1)    Ti(2)   C(7)    C(8)    -36.5(7) 1_555 1_555 1_555 1_555 yes
   S(1)    Ti(2)   C(8)    C(7)    158.5(4) 1_555 1_555 1_555 1_555 yes
   S(1)    Ti(2)   C(8)    C(9)    42.7(5)  1_555 1_555 1_555 1_555 yes
   S(1)    Ti(2)   C(9)    C(8)    -142.0(5) 1_555 1_555 1_555 1_555 yes
   S(1)    Ti(2)   C(9)    C(10)   101.9(5) 1_555 1_555 1_555 1_555 yes
   S(1)    Ti(2)   C(10)   C(6)    166.3(5) 1_555 1_555 1_555 1_555 yes
   S(1)    Ti(2)   C(10)   C(9)    -79.2(5) 1_555 1_555 1_555 1_555 yes
   S(2)    Ru(2)   Ru(1)   S(3)    95.01(7) 1_555 1_555 1_555 1_555 yes
   S(2)    Ru(2)   Ru(1)   S(4)    -92.83(7) 1_555 1_555 1_555 1_555 yes
   S(2)    Ru(2)   Ru(1)   C(11)   171.4(2) 1_555 1_555 1_555 1_555 yes
   S(2)    Ru(2)   Ru(1)   C(12)   133.2(2) 1_555 1_555 1_555 1_555 yes
   S(2)    Ru(2)   Ru(1)   C(13)   110.5(9) 1_555 1_555 1_555 1_555 yes
   S(2)    Ru(2)   Ru(1)   C(14)   -114.5(4) 1_555 1_555 1_555 1_555 yes
   S(2)    Ru(2)   Ru(1)   C(15)   -147.9(2) 1_555 1_555 1_555 1_555 yes
   S(2)    Ru(2)   Ti(1)   S(3)    167.92(8) 1_555 1_555 1_555 1_555 yes
   S(2)    Ru(2)   Ti(1)   C(1)    17.4(6)  1_555 1_555 1_555 1_555 yes
   S(2)    Ru(2)   Ti(1)   C(2)    45.9(3)  1_555 1_555 1_555 1_555 yes
   S(2)    Ru(2)   Ti(1)   C(3)    84.7(3)  1_555 1_555 1_555 1_555 yes
   S(2)    Ru(2)   Ti(1)   C(4)    124.5(3) 1_555 1_555 1_555 1_555 yes
   S(2)    Ru(2)   Ti(1)   C(5)    151.5(7) 1_555 1_555 1_555 1_555 yes
   S(2)    Ru(2)   Ti(2)   S(4)    -164.63(8) 1_555 1_555 1_555 1_555 yes
   S(2)    Ru(2)   Ti(2)   C(6)    -118.8(3) 1_555 1_555 1_555 1_555 yes
   S(2)    Ru(2)   Ti(2)   C(7)    -78.7(2) 1_555 1_555 1_555 1_555 yes
   S(2)    Ru(2)   Ti(2)   C(8)    -38.7(3) 1_555 1_555 1_555 1_555 yes
   S(2)    Ru(2)   Ti(2)   C(9)    -5.6(8)  1_555 1_555 1_555 1_555 yes
   S(2)    Ru(2)   Ti(2)   C(10)   -154.4(5) 1_555 1_555 1_555 1_555 yes
   S(2)    Ru(2)   C(21)   C(22)   8.8(6)   1_555 1_555 1_555 1_555 yes
   S(2)    Ru(2)   C(21)   C(25)   -108.8(4) 1_555 1_555 1_555 1_555 yes
   S(2)    Ru(2)   C(21)   C(26)   128.3(6) 1_555 1_555 1_555 1_555 yes
   S(2)    Ru(2)   C(22)   C(21)   -174.6(3) 1_555 1_555 1_555 1_555 yes
   S(2)    Ru(2)   C(22)   C(23)   -59.2(4) 1_555 1_555 1_555 1_555 yes
   S(2)    Ru(2)   C(22)   C(27)   63.2(7)  1_555 1_555 1_555 1_555 yes
   S(2)    Ru(2)   C(23)   C(22)   124.1(4) 1_555 1_555 1_555 1_555 yes
   S(2)    Ru(2)   C(23)   C(24)   -117.1(4) 1_555 1_555 1_555 1_555 yes
   S(2)    Ru(2)   C(23)   C(28)   4.4(6)   1_555 1_555 1_555 1_555 yes
   S(2)    Ru(2)   C(24)   C(23)   65.2(4)  1_555 1_555 1_555 1_555 yes
   S(2)    Ru(2)   C(24)   C(25)   -178.7(3) 1_555 1_555 1_555 1_555 yes
   S(2)    Ru(2)   C(24)   C(29)   -57.0(7) 1_555 1_555 1_555 1_555 yes
   S(2)    Ru(2)   C(25)   C(21)   119.6(4) 1_555 1_555 1_555 1_555 yes
   S(2)    Ru(2)   C(25)   C(24)   2.0(5)   1_555 1_555 1_555 1_555 yes
   S(2)    Ru(2)   C(25)   C(30)   -117.9(6) 1_555 1_555 1_555 1_555 yes
   S(2)    Ti(1)   Ru(1)   S(3)    -102.67(8) 1_555 1_555 1_555 1_555 yes
   S(2)    Ti(1)   Ru(1)   S(4)    -0.22(7) 1_555 1_555 1_555 1_555 yes
   S(2)    Ti(1)   Ru(1)   C(11)   -132.2(3) 1_555 1_555 1_555 1_555 yes
   S(2)    Ti(1)   Ru(1)   C(12)   -166.0(2) 1_555 1_555 1_555 1_555 yes
   S(2)    Ti(1)   Ru(1)   C(13)   153.9(2) 1_555 1_555 1_555 1_555 yes
   S(2)    Ti(1)   Ru(1)   C(14)   120.1(3) 1_555 1_555 1_555 1_555 yes
   S(2)    Ti(1)   Ru(1)   C(15)   -164(1)  1_555 1_555 1_555 1_555 yes
   S(2)    Ti(1)   Ru(2)   S(3)    -167.92(8) 1_555 1_555 1_555 1_555 yes
   S(2)    Ti(1)   Ru(2)   S(4)    90.07(7) 1_555 1_555 1_555 1_555 yes
   S(2)    Ti(1)   Ru(2)   C(21)   -145.5(6) 1_555 1_555 1_555 1_555 yes
   S(2)    Ti(1)   Ru(2)   C(22)   -23.7(4) 1_555 1_555 1_555 1_555 yes
   S(2)    Ti(1)   Ru(2)   C(23)   -51.0(2) 1_555 1_555 1_555 1_555 yes
   S(2)    Ti(1)   Ru(2)   C(24)   -89.7(2) 1_555 1_555 1_555 1_555 yes
   S(2)    Ti(1)   Ru(2)   C(25)   -127.0(2) 1_555 1_555 1_555 1_555 yes
   S(2)    Ti(1)   Ti(2)   S(4)    -97.96(8) 1_555 1_555 1_555 1_555 yes
   S(2)    Ti(1)   Ti(2)   C(6)    100(1)   1_555 1_555 1_555 1_555 yes
   S(2)    Ti(1)   Ti(2)   C(7)    31.0(3)  1_555 1_555 1_555 1_555 yes
   S(2)    Ti(1)   Ti(2)   C(8)    62.4(2)  1_555 1_555 1_555 1_555 yes
   S(2)    Ti(1)   Ti(2)   C(9)    101.1(3) 1_555 1_555 1_555 1_555 yes
   S(2)    Ti(1)   Ti(2)   C(10)   134.6(3) 1_555 1_555 1_555 1_555 yes
   S(2)    Ti(1)   C(1)    C(2)    55.9(6)  1_555 1_555 1_555 1_555 yes
   S(2)    Ti(1)   C(1)    C(5)    172.5(5) 1_555 1_555 1_555 1_555 yes
   S(2)    Ti(1)   C(2)    C(1)    -127.9(6) 1_555 1_555 1_555 1_555 yes
   S(2)    Ti(1)   C(2)    C(3)    114.7(6) 1_555 1_555 1_555 1_555 yes
   S(2)    Ti(1)   C(3)    C(2)    -67.9(6) 1_555 1_555 1_555 1_555 yes
   S(2)    Ti(1)   C(3)    C(4)    178.2(5) 1_555 1_555 1_555 1_555 yes
   S(2)    Ti(1)   C(4)    C(3)    -2.6(8)  1_555 1_555 1_555 1_555 yes
   S(2)    Ti(1)   C(4)    C(5)    -117.6(6) 1_555 1_555 1_555 1_555 yes
   S(2)    Ti(1)   C(5)    C(1)    -11.6(8) 1_555 1_555 1_555 1_555 yes
   S(2)    Ti(1)   C(5)    C(4)    105.1(7) 1_555 1_555 1_555 1_555 yes
   S(2)    Ti(2)   Ru(1)   S(3)    -1.55(7) 1_555 1_555 1_555 1_555 yes
   S(2)    Ti(2)   Ru(1)   S(4)    100.13(8) 1_555 1_555 1_555 1_555 yes
   S(2)    Ti(2)   Ru(1)   C(11)   123.1(4) 1_555 1_555 1_555 1_555 yes
   S(2)    Ti(2)   Ru(1)   C(12)   -114.6(6) 1_555 1_555 1_555 1_555 yes
   S(2)    Ti(2)   Ru(1)   C(13)   -135.1(2) 1_555 1_555 1_555 1_555 yes
   S(2)    Ti(2)   Ru(1)   C(14)   -172.7(2) 1_555 1_555 1_555 1_555 yes
   S(2)    Ti(2)   Ru(1)   C(15)   148.4(2) 1_555 1_555 1_555 1_555 yes
   S(2)    Ti(2)   Ru(2)   S(3)    -92.80(7) 1_555 1_555 1_555 1_555 yes
   S(2)    Ti(2)   Ru(2)   S(4)    164.63(8) 1_555 1_555 1_555 1_555 yes
   S(2)    Ti(2)   Ru(2)   C(21)   130.0(2) 1_555 1_555 1_555 1_555 yes
   S(2)    Ti(2)   Ru(2)   C(22)   93.3(2)  1_555 1_555 1_555 1_555 yes
   S(2)    Ti(2)   Ru(2)   C(23)   53.2(2)  1_555 1_555 1_555 1_555 yes
   S(2)    Ti(2)   Ru(2)   C(24)   22.7(3)  1_555 1_555 1_555 1_555 yes
   S(2)    Ti(2)   Ru(2)   C(25)   143.0(8) 1_555 1_555 1_555 1_555 yes
   S(2)    Ti(2)   Ti(1)   S(3)    99.80(8) 1_555 1_555 1_555 1_555 yes
   S(2)    Ti(2)   Ti(1)   C(1)    -92.9(3) 1_555 1_555 1_555 1_555 yes
   S(2)    Ti(2)   Ti(1)   C(2)    -55.2(3) 1_555 1_555 1_555 1_555 yes
   S(2)    Ti(2)   Ti(1)   C(3)    -25.9(4) 1_555 1_555 1_555 1_555 yes
   S(2)    Ti(2)   Ti(1)   C(4)    -126(1)  1_555 1_555 1_555 1_555 yes
   S(2)    Ti(2)   Ti(1)   C(5)    -126.4(3) 1_555 1_555 1_555 1_555 yes
   S(2)    Ti(2)   C(6)    C(7)    15.8(6)  1_555 1_555 1_555 1_555 yes
   S(2)    Ti(2)   C(6)    C(10)   133.8(5) 1_555 1_555 1_555 1_555 yes
   S(2)    Ti(2)   C(7)    C(6)    -168.3(4) 1_555 1_555 1_555 1_555 yes
   S(2)    Ti(2)   C(7)    C(8)    76.4(5)  1_555 1_555 1_555 1_555 yes
   S(2)    Ti(2)   C(8)    C(7)    -106.5(5) 1_555 1_555 1_555 1_555 yes
   S(2)    Ti(2)   C(8)    C(9)    137.7(5) 1_555 1_555 1_555 1_555 yes
   S(2)    Ti(2)   C(9)    C(8)    -47.8(5) 1_555 1_555 1_555 1_555 yes
   S(2)    Ti(2)   C(9)    C(10)   -164.0(4) 1_555 1_555 1_555 1_555 yes
   S(2)    Ti(2)   C(10)   C(6)    -86.3(7) 1_555 1_555 1_555 1_555 yes
   S(2)    Ti(2)   C(10)   C(9)    28.2(8)  1_555 1_555 1_555 1_555 yes
   S(3)    Ru(1)   Ru(2)   S(4)    -172.16(8) 1_555 1_555 1_555 1_555 yes
   S(3)    Ru(1)   Ru(2)   C(21)   -103.3(2) 1_555 1_555 1_555 1_555 yes
   S(3)    Ru(1)   Ru(2)   C(22)   -140.1(3) 1_555 1_555 1_555 1_555 yes
   S(3)    Ru(1)   Ru(2)   C(23)   -128(2)  1_555 1_555 1_555 1_555 yes
   S(3)    Ru(1)   Ru(2)   C(24)   -27.5(3) 1_555 1_555 1_555 1_555 yes
   S(3)    Ru(1)   Ru(2)   C(25)   -62.4(2) 1_555 1_555 1_555 1_555 yes
   S(3)    Ru(1)   Ti(1)   C(1)    133.3(4) 1_555 1_555 1_555 1_555 yes
   S(3)    Ru(1)   Ti(1)   C(2)    153(1)   1_555 1_555 1_555 1_555 yes
   S(3)    Ru(1)   Ti(1)   C(3)    20.1(4)  1_555 1_555 1_555 1_555 yes
   S(3)    Ru(1)   Ti(1)   C(4)    56.1(3)  1_555 1_555 1_555 1_555 yes
   S(3)    Ru(1)   Ti(1)   C(5)    96.5(3)  1_555 1_555 1_555 1_555 yes
   S(3)    Ru(1)   Ti(2)   S(4)    -101.67(7) 1_555 1_555 1_555 1_555 yes
   S(3)    Ru(1)   Ti(2)   C(6)    -154.6(2) 1_555 1_555 1_555 1_555 yes
   S(3)    Ru(1)   Ti(2)   C(7)    -125.3(4) 1_555 1_555 1_555 1_555 yes
   S(3)    Ru(1)   Ti(2)   C(8)    109.3(8) 1_555 1_555 1_555 1_555 yes
   S(3)    Ru(1)   Ti(2)   C(9)    129.4(3) 1_555 1_555 1_555 1_555 yes
   S(3)    Ru(1)   Ti(2)   C(10)   167.0(3) 1_555 1_555 1_555 1_555 yes
   S(3)    Ru(1)   C(11)   C(12)   -80.0(4) 1_555 1_555 1_555 1_555 yes
   S(3)    Ru(1)   C(11)   C(15)   162.8(4) 1_555 1_555 1_555 1_555 yes
   S(3)    Ru(1)   C(11)   C(16)   40.8(6)  1_555 1_555 1_555 1_555 yes
   S(3)    Ru(1)   C(12)   C(11)   100.4(4) 1_555 1_555 1_555 1_555 yes
   S(3)    Ru(1)   C(12)   C(13)   -142.9(4) 1_555 1_555 1_555 1_555 yes
   S(3)    Ru(1)   C(12)   C(17)   -19.7(6) 1_555 1_555 1_555 1_555 yes
   S(3)    Ru(1)   C(13)   C(12)   42.1(4)  1_555 1_555 1_555 1_555 yes
   S(3)    Ru(1)   C(13)   C(14)   160.4(4) 1_555 1_555 1_555 1_555 yes
   S(3)    Ru(1)   C(13)   C(18)   -78.2(7) 1_555 1_555 1_555 1_555 yes
   S(3)    Ru(1)   C(14)   C(13)   -36.3(6) 1_555 1_555 1_555 1_555 yes
   S(3)    Ru(1)   C(14)   C(15)   78.8(5)  1_555 1_555 1_555 1_555 yes
   S(3)    Ru(1)   C(14)   C(19)   -157.4(5) 1_555 1_555 1_555 1_555 yes
   S(3)    Ru(1)   C(15)   C(11)   -22.3(5) 1_555 1_555 1_555 1_555 yes
   S(3)    Ru(1)   C(15)   C(14)   -140.1(3) 1_555 1_555 1_555 1_555 yes
   S(3)    Ru(1)   C(15)   C(20)   101.4(7) 1_555 1_555 1_555 1_555 yes
   S(3)    Ru(2)   Ru(1)   S(4)    172.16(8) 1_555 1_555 1_555 1_555 yes
   S(3)    Ru(2)   Ru(1)   C(11)   76.4(2)  1_555 1_555 1_555 1_555 yes
   S(3)    Ru(2)   Ru(1)   C(12)   38.2(2)  1_555 1_555 1_555 1_555 yes
   S(3)    Ru(2)   Ru(1)   C(13)   15.5(9)  1_555 1_555 1_555 1_555 yes
   S(3)    Ru(2)   Ru(1)   C(14)   150.5(4) 1_555 1_555 1_555 1_555 yes
   S(3)    Ru(2)   Ru(1)   C(15)   117.1(2) 1_555 1_555 1_555 1_555 yes
   S(3)    Ru(2)   Ti(1)   C(1)    -150.5(6) 1_555 1_555 1_555 1_555 yes
   S(3)    Ru(2)   Ti(1)   C(2)    -122.0(4) 1_555 1_555 1_555 1_555 yes
   S(3)    Ru(2)   Ti(1)   C(3)    -83.2(3) 1_555 1_555 1_555 1_555 yes
   S(3)    Ru(2)   Ti(1)   C(4)    -43.4(3) 1_555 1_555 1_555 1_555 yes
   S(3)    Ru(2)   Ti(1)   C(5)    -16.4(7) 1_555 1_555 1_555 1_555 yes
   S(3)    Ru(2)   Ti(2)   S(4)    102.57(7) 1_555 1_555 1_555 1_555 yes
   S(3)    Ru(2)   Ti(2)   C(6)    148.4(3) 1_555 1_555 1_555 1_555 yes
   S(3)    Ru(2)   Ti(2)   C(7)    -171.5(2) 1_555 1_555 1_555 1_555 yes
   S(3)    Ru(2)   Ti(2)   C(8)    -131.5(3) 1_555 1_555 1_555 1_555 yes
   S(3)    Ru(2)   Ti(2)   C(9)    -98.4(8) 1_555 1_555 1_555 1_555 yes
   S(3)    Ru(2)   Ti(2)   C(10)   112.8(5) 1_555 1_555 1_555 1_555 yes
   S(3)    Ru(2)   C(21)   C(22)   161.0(3) 1_555 1_555 1_555 1_555 yes
   S(3)    Ru(2)   C(21)   C(25)   43.5(4)  1_555 1_555 1_555 1_555 yes
   S(3)    Ru(2)   C(21)   C(26)   -79.5(7) 1_555 1_555 1_555 1_555 yes
   S(3)    Ru(2)   C(22)   C(21)   -34.7(6) 1_555 1_555 1_555 1_555 yes
   S(3)    Ru(2)   C(22)   C(23)   80.7(5)  1_555 1_555 1_555 1_555 yes
   S(3)    Ru(2)   C(22)   C(27)   -156.9(5) 1_555 1_555 1_555 1_555 yes
   S(3)    Ru(2)   C(23)   C(22)   -138.7(3) 1_555 1_555 1_555 1_555 yes
   S(3)    Ru(2)   C(23)   C(24)   -20.0(5) 1_555 1_555 1_555 1_555 yes
   S(3)    Ru(2)   C(23)   C(28)   101.5(6) 1_555 1_555 1_555 1_555 yes
   S(3)    Ru(2)   C(24)   C(23)   164.6(4) 1_555 1_555 1_555 1_555 yes
   S(3)    Ru(2)   C(24)   C(25)   -79.2(4) 1_555 1_555 1_555 1_555 yes
   S(3)    Ru(2)   C(24)   C(29)   42.4(7)  1_555 1_555 1_555 1_555 yes
   S(3)    Ru(2)   C(25)   C(21)   -141.3(4) 1_555 1_555 1_555 1_555 yes
   S(3)    Ru(2)   C(25)   C(24)   101.1(4) 1_555 1_555 1_555 1_555 yes
   S(3)    Ru(2)   C(25)   C(30)   -18.9(7) 1_555 1_555 1_555 1_555 yes
   S(3)    Ti(1)   Ru(1)   S(4)    102.45(7) 1_555 1_555 1_555 1_555 yes
   S(3)    Ti(1)   Ru(1)   C(11)   -29.6(3) 1_555 1_555 1_555 1_555 yes
   S(3)    Ti(1)   Ru(1)   C(12)   -63.3(2) 1_555 1_555 1_555 1_555 yes
   S(3)    Ti(1)   Ru(1)   C(13)   -103.4(2) 1_555 1_555 1_555 1_555 yes
   S(3)    Ti(1)   Ru(1)   C(14)   -137.2(3) 1_555 1_555 1_555 1_555 yes
   S(3)    Ti(1)   Ru(1)   C(15)   -61(1)   1_555 1_555 1_555 1_555 yes
   S(3)    Ti(1)   Ru(2)   S(4)    -102.01(7) 1_555 1_555 1_555 1_555 yes
   S(3)    Ti(1)   Ru(2)   C(21)   22.5(6)  1_555 1_555 1_555 1_555 yes
   S(3)    Ti(1)   Ru(2)   C(22)   144.2(4) 1_555 1_555 1_555 1_555 yes
   S(3)    Ti(1)   Ru(2)   C(23)   116.9(2) 1_555 1_555 1_555 1_555 yes
   S(3)    Ti(1)   Ru(2)   C(24)   78.2(2)  1_555 1_555 1_555 1_555 yes
   S(3)    Ti(1)   Ru(2)   C(25)   41.0(2)  1_555 1_555 1_555 1_555 yes
   S(3)    Ti(1)   Ti(2)   S(4)    1.84(7)  1_555 1_555 1_555 1_555 yes
   S(3)    Ti(1)   Ti(2)   C(6)    -159(1)  1_555 1_555 1_555 1_555 yes
   S(3)    Ti(1)   Ti(2)   C(7)    130.8(3) 1_555 1_555 1_555 1_555 yes
   S(3)    Ti(1)   Ti(2)   C(8)    162.2(2) 1_555 1_555 1_555 1_555 yes
   S(3)    Ti(1)   Ti(2)   C(9)    -159.1(3) 1_555 1_555 1_555 1_555 yes
   S(3)    Ti(1)   Ti(2)   C(10)   -125.6(3) 1_555 1_555 1_555 1_555 yes
   S(3)    Ti(1)   C(1)    C(2)    -95.8(7) 1_555 1_555 1_555 1_555 yes
   S(3)    Ti(1)   C(1)    C(5)    20.9(8)  1_555 1_555 1_555 1_555 yes
   S(3)    Ti(1)   C(2)    C(1)    126.7(6) 1_555 1_555 1_555 1_555 yes
   S(3)    Ti(1)   C(2)    C(3)    9.3(7)   1_555 1_555 1_555 1_555 yes
   S(3)    Ti(1)   C(3)    C(2)    -173.4(5) 1_555 1_555 1_555 1_555 yes
   S(3)    Ti(1)   C(3)    C(4)    72.7(6)  1_555 1_555 1_555 1_555 yes
   S(3)    Ti(1)   C(4)    C(3)    -110.6(6) 1_555 1_555 1_555 1_555 yes
   S(3)    Ti(1)   C(4)    C(5)    134.4(5) 1_555 1_555 1_555 1_555 yes
   S(3)    Ti(1)   C(5)    C(1)    -167.5(5) 1_555 1_555 1_555 1_555 yes
   S(3)    Ti(1)   C(5)    C(4)    -50.9(6) 1_555 1_555 1_555 1_555 yes
   S(4)    Ru(1)   Ru(2)   C(21)   68.8(2)  1_555 1_555 1_555 1_555 yes
   S(4)    Ru(1)   Ru(2)   C(22)   32.0(3)  1_555 1_555 1_555 1_555 yes
   S(4)    Ru(1)   Ru(2)   C(23)   43(2)    1_555 1_555 1_555 1_555 yes
   S(4)    Ru(1)   Ru(2)   C(24)   144.7(3) 1_555 1_555 1_555 1_555 yes
   S(4)    Ru(1)   Ru(2)   C(25)   109.8(2) 1_555 1_555 1_555 1_555 yes
   S(4)    Ru(1)   Ti(1)   C(1)    -124.2(3) 1_555 1_555 1_555 1_555 yes
   S(4)    Ru(1)   Ti(1)   C(2)    -104(1)  1_555 1_555 1_555 1_555 yes
   S(4)    Ru(1)   Ti(1)   C(3)    122.6(4) 1_555 1_555 1_555 1_555 yes
   S(4)    Ru(1)   Ti(1)   C(4)    158.6(3) 1_555 1_555 1_555 1_555 yes
   S(4)    Ru(1)   Ti(1)   C(5)    -161.0(3) 1_555 1_555 1_555 1_555 yes
   S(4)    Ru(1)   Ti(2)   C(6)    -52.9(2) 1_555 1_555 1_555 1_555 yes
   S(4)    Ru(1)   Ti(2)   C(7)    -23.6(4) 1_555 1_555 1_555 1_555 yes
   S(4)    Ru(1)   Ti(2)   C(8)    -149.0(8) 1_555 1_555 1_555 1_555 yes
   S(4)    Ru(1)   Ti(2)   C(9)    -128.9(3) 1_555 1_555 1_555 1_555 yes
   S(4)    Ru(1)   Ti(2)   C(10)   -91.4(3) 1_555 1_555 1_555 1_555 yes
   S(4)    Ru(1)   C(11)   C(12)   172.4(4) 1_555 1_555 1_555 1_555 yes
   S(4)    Ru(1)   C(11)   C(15)   55.2(4)  1_555 1_555 1_555 1_555 yes
   S(4)    Ru(1)   C(11)   C(16)   -66.9(7) 1_555 1_555 1_555 1_555 yes
   S(4)    Ru(1)   C(12)   C(11)   -12.6(6) 1_555 1_555 1_555 1_555 yes
   S(4)    Ru(1)   C(12)   C(13)   104.1(5) 1_555 1_555 1_555 1_555 yes
   S(4)    Ru(1)   C(12)   C(17)   -132.7(6) 1_555 1_555 1_555 1_555 yes
   S(4)    Ru(1)   C(13)   C(12)   -123.6(4) 1_555 1_555 1_555 1_555 yes
   S(4)    Ru(1)   C(13)   C(14)   -5.2(5)  1_555 1_555 1_555 1_555 yes
   S(4)    Ru(1)   C(13)   C(18)   116.1(6) 1_555 1_555 1_555 1_555 yes
   S(4)    Ru(1)   C(14)   C(13)   176.4(4) 1_555 1_555 1_555 1_555 yes
   S(4)    Ru(1)   C(14)   C(15)   -68.4(4) 1_555 1_555 1_555 1_555 yes
   S(4)    Ru(1)   C(14)   C(19)   55.4(7)  1_555 1_555 1_555 1_555 yes
   S(4)    Ru(1)   C(15)   C(11)   -128.6(4) 1_555 1_555 1_555 1_555 yes
   S(4)    Ru(1)   C(15)   C(14)   113.6(4) 1_555 1_555 1_555 1_555 yes
   S(4)    Ru(1)   C(15)   C(20)   -4.9(7)  1_555 1_555 1_555 1_555 yes
   S(4)    Ru(2)   Ru(1)   C(11)   -95.8(2) 1_555 1_555 1_555 1_555 yes
   S(4)    Ru(2)   Ru(1)   C(12)   -134.0(2) 1_555 1_555 1_555 1_555 yes
   S(4)    Ru(2)   Ru(1)   C(13)   -156.7(9) 1_555 1_555 1_555 1_555 yes
   S(4)    Ru(2)   Ru(1)   C(14)   -21.6(4) 1_555 1_555 1_555 1_555 yes
   S(4)    Ru(2)   Ru(1)   C(15)   -55.0(2) 1_555 1_555 1_555 1_555 yes
   S(4)    Ru(2)   Ti(1)   C(1)    107.5(6) 1_555 1_555 1_555 1_555 yes
   S(4)    Ru(2)   Ti(1)   C(2)    136.0(3) 1_555 1_555 1_555 1_555 yes
   S(4)    Ru(2)   Ti(1)   C(3)    174.8(3) 1_555 1_555 1_555 1_555 yes
   S(4)    Ru(2)   Ti(1)   C(4)    -145.4(3) 1_555 1_555 1_555 1_555 yes
   S(4)    Ru(2)   Ti(1)   C(5)    -118.5(7) 1_555 1_555 1_555 1_555 yes
   S(4)    Ru(2)   Ti(2)   C(6)    45.9(3)  1_555 1_555 1_555 1_555 yes
   S(4)    Ru(2)   Ti(2)   C(7)    86.0(2)  1_555 1_555 1_555 1_555 yes
   S(4)    Ru(2)   Ti(2)   C(8)    126.0(3) 1_555 1_555 1_555 1_555 yes
   S(4)    Ru(2)   Ti(2)   C(9)    159.0(8) 1_555 1_555 1_555 1_555 yes
   S(4)    Ru(2)   Ti(2)   C(10)   10.3(5)  1_555 1_555 1_555 1_555 yes
   S(4)    Ru(2)   C(21)   C(22)   -91.8(4) 1_555 1_555 1_555 1_555 yes
   S(4)    Ru(2)   C(21)   C(25)   150.7(4) 1_555 1_555 1_555 1_555 yes
   S(4)    Ru(2)   C(21)   C(26)   27.7(7)  1_555 1_555 1_555 1_555 yes
   S(4)    Ru(2)   C(22)   C(21)   88.4(4)  1_555 1_555 1_555 1_555 yes
   S(4)    Ru(2)   C(22)   C(23)   -156.3(4) 1_555 1_555 1_555 1_555 yes
   S(4)    Ru(2)   C(22)   C(27)   -33.8(7) 1_555 1_555 1_555 1_555 yes
   S(4)    Ru(2)   C(23)   C(22)   29.1(5)  1_555 1_555 1_555 1_555 yes
   S(4)    Ru(2)   C(23)   C(24)   147.9(3) 1_555 1_555 1_555 1_555 yes
   S(4)    Ru(2)   C(23)   C(28)   -90.6(7) 1_555 1_555 1_555 1_555 yes
   S(4)    Ru(2)   C(24)   C(23)   -62.9(6) 1_555 1_555 1_555 1_555 yes
   S(4)    Ru(2)   C(24)   C(25)   53.3(6)  1_555 1_555 1_555 1_555 yes
   S(4)    Ru(2)   C(24)   C(29)   174.9(5) 1_555 1_555 1_555 1_555 yes
   S(4)    Ru(2)   C(25)   C(21)   -34.9(4) 1_555 1_555 1_555 1_555 yes
   S(4)    Ru(2)   C(25)   C(24)   -152.5(3) 1_555 1_555 1_555 1_555 yes
   S(4)    Ru(2)   C(25)   C(30)   87.6(7)  1_555 1_555 1_555 1_555 yes
   S(4)    Ti(2)   Ru(1)   C(11)   23.0(4)  1_555 1_555 1_555 1_555 yes
   S(4)    Ti(2)   Ru(1)   C(12)   145.3(6) 1_555 1_555 1_555 1_555 yes
   S(4)    Ti(2)   Ru(1)   C(13)   124.8(2) 1_555 1_555 1_555 1_555 yes
   S(4)    Ti(2)   Ru(1)   C(14)   87.1(2)  1_555 1_555 1_555 1_555 yes
   S(4)    Ti(2)   Ru(1)   C(15)   48.3(2)  1_555 1_555 1_555 1_555 yes
   S(4)    Ti(2)   Ru(2)   C(21)   -34.6(2) 1_555 1_555 1_555 1_555 yes
   S(4)    Ti(2)   Ru(2)   C(22)   -71.3(2) 1_555 1_555 1_555 1_555 yes
   S(4)    Ti(2)   Ru(2)   C(23)   -111.4(2) 1_555 1_555 1_555 1_555 yes
   S(4)    Ti(2)   Ru(2)   C(24)   -141.9(3) 1_555 1_555 1_555 1_555 yes
   S(4)    Ti(2)   Ru(2)   C(25)   -21.6(8) 1_555 1_555 1_555 1_555 yes
   S(4)    Ti(2)   Ti(1)   C(1)    169.1(3) 1_555 1_555 1_555 1_555 yes
   S(4)    Ti(2)   Ti(1)   C(2)    -153.2(3) 1_555 1_555 1_555 1_555 yes
   S(4)    Ti(2)   Ti(1)   C(3)    -123.8(4) 1_555 1_555 1_555 1_555 yes
   S(4)    Ti(2)   Ti(1)   C(4)    135(1)   1_555 1_555 1_555 1_555 yes
   S(4)    Ti(2)   Ti(1)   C(5)    135.6(3) 1_555 1_555 1_555 1_555 yes
   S(4)    Ti(2)   C(6)    C(7)    119.7(5) 1_555 1_555 1_555 1_555 yes
   S(4)    Ti(2)   C(6)    C(10)   -122.3(5) 1_555 1_555 1_555 1_555 yes
   S(4)    Ti(2)   C(7)    C(6)    -64.1(5) 1_555 1_555 1_555 1_555 yes
   S(4)    Ti(2)   C(7)    C(8)    -179.5(4) 1_555 1_555 1_555 1_555 yes
   S(4)    Ti(2)   C(8)    C(7)    0.8(6)   1_555 1_555 1_555 1_555 yes
   S(4)    Ti(2)   C(8)    C(9)    -115.0(5) 1_555 1_555 1_555 1_555 yes
   S(4)    Ti(2)   C(9)    C(8)    110.5(6) 1_555 1_555 1_555 1_555 yes
   S(4)    Ti(2)   C(9)    C(10)   -5.7(7)  1_555 1_555 1_555 1_555 yes
   S(4)    Ti(2)   C(10)   C(6)    61.8(5)  1_555 1_555 1_555 1_555 yes
   S(4)    Ti(2)   C(10)   C(9)    176.3(4) 1_555 1_555 1_555 1_555 yes
   O(1)    C(31)   N(1)    C(32)   -5(2)    1_555 1_555 1_555 1_555 yes
   O(1)    C(31)   N(1)    C(33)   172(1)   1_555 1_555 1_555 1_555 yes
   O(2)    C(34)   N(2)    C(35)   1(1)     1_555 1_555 1_555 1_555 yes
   O(2)    C(34)   N(2)    C(36)   -179.6(9) 1_555 1_555 1_555 1_555 yes
   C(1)    Ti(1)   Ru(1)   C(11)   103.8(4) 1_555 1_555 1_555 1_555 yes
   C(1)    Ti(1)   Ru(1)   C(12)   70.0(4)  1_555 1_555 1_555 1_555 yes
   C(1)    Ti(1)   Ru(1)   C(13)   29.9(4)  1_555 1_555 1_555 1_555 yes
   C(1)    Ti(1)   Ru(1)   C(14)   -3.9(5)  1_555 1_555 1_555 1_555 yes
   C(1)    Ti(1)   Ru(1)   C(15)   71(1)    1_555 1_555 1_555 1_555 yes
   C(1)    Ti(1)   Ru(2)   C(21)   -128.0(8) 1_555 1_555 1_555 1_555 yes
   C(1)    Ti(1)   Ru(2)   C(22)   -6.3(7)  1_555 1_555 1_555 1_555 yes
   C(1)    Ti(1)   Ru(2)   C(23)   -33.6(6) 1_555 1_555 1_555 1_555 yes
   C(1)    Ti(1)   Ru(2)   C(24)   -72.3(6) 1_555 1_555 1_555 1_555 yes
   C(1)    Ti(1)   Ru(2)   C(25)   -109.6(6) 1_555 1_555 1_555 1_555 yes
   C(1)    Ti(1)   Ti(2)   C(6)    7(1)     1_555 1_555 1_555 1_555 yes
   C(1)    Ti(1)   Ti(2)   C(7)    -61.9(4) 1_555 1_555 1_555 1_555 yes
   C(1)    Ti(1)   Ti(2)   C(8)    -30.5(4) 1_555 1_555 1_555 1_555 yes
   C(1)    Ti(1)   Ti(2)   C(9)    8.2(4)   1_555 1_555 1_555 1_555 yes
   C(1)    Ti(1)   Ti(2)   C(10)   41.7(4)  1_555 1_555 1_555 1_555 yes
   C(1)    Ti(1)   C(2)    C(3)    -117.4(8) 1_555 1_555 1_555 1_555 yes
   C(1)    Ti(1)   C(3)    C(2)    35.9(5)  1_555 1_555 1_555 1_555 yes
   C(1)    Ti(1)   C(3)    C(4)    -78.0(5) 1_555 1_555 1_555 1_555 yes
   C(1)    Ti(1)   C(4)    C(3)    78.3(6)  1_555 1_555 1_555 1_555 yes
   C(1)    Ti(1)   C(4)    C(5)    -36.7(5) 1_555 1_555 1_555 1_555 yes
   C(1)    Ti(1)   C(5)    C(4)    116.6(7) 1_555 1_555 1_555 1_555 yes
   C(1)    C(2)    Ti(1)   C(3)    117.4(8) 1_555 1_555 1_555 1_555 yes
   C(1)    C(2)    Ti(1)   C(4)    78.2(6)  1_555 1_555 1_555 1_555 yes
   C(1)    C(2)    Ti(1)   C(5)    36.9(5)  1_555 1_555 1_555 1_555 yes
   C(1)    C(2)    C(3)    C(4)    0.9(10)  1_555 1_555 1_555 1_555 yes
   C(1)    C(5)    Ti(1)   C(2)    -36.5(5) 1_555 1_555 1_555 1_555 yes
   C(1)    C(5)    Ti(1)   C(3)    -78.0(5) 1_555 1_555 1_555 1_555 yes
   C(1)    C(5)    Ti(1)   C(4)    -116.6(7) 1_555 1_555 1_555 1_555 yes
   C(1)    C(5)    C(4)    C(3)    -0.4(9)  1_555 1_555 1_555 1_555 yes
   C(2)    Ti(1)   Ru(1)   C(11)   123(1)   1_555 1_555 1_555 1_555 yes
   C(2)    Ti(1)   Ru(1)   C(12)   90(1)    1_555 1_555 1_555 1_555 yes
   C(2)    Ti(1)   Ru(1)   C(13)   49(1)    1_555 1_555 1_555 1_555 yes
   C(2)    Ti(1)   Ru(1)   C(14)   16(1)    1_555 1_555 1_555 1_555 yes
   C(2)    Ti(1)   Ru(1)   C(15)   91(2)    1_555 1_555 1_555 1_555 yes
   C(2)    Ti(1)   Ru(2)   C(21)   -99.5(7) 1_555 1_555 1_555 1_555 yes
   C(2)    Ti(1)   Ru(2)   C(22)   22.2(5)  1_555 1_555 1_555 1_555 yes
   C(2)    Ti(1)   Ru(2)   C(23)   -5.1(4)  1_555 1_555 1_555 1_555 yes
   C(2)    Ti(1)   Ru(2)   C(24)   -43.8(4) 1_555 1_555 1_555 1_555 yes
   C(2)    Ti(1)   Ru(2)   C(25)   -81.1(4) 1_555 1_555 1_555 1_555 yes
   C(2)    Ti(1)   Ti(2)   C(6)    45(1)    1_555 1_555 1_555 1_555 yes
   C(2)    Ti(1)   Ti(2)   C(7)    -24.2(4) 1_555 1_555 1_555 1_555 yes
   C(2)    Ti(1)   Ti(2)   C(8)    7.2(4)   1_555 1_555 1_555 1_555 yes
   C(2)    Ti(1)   Ti(2)   C(9)    45.9(4)  1_555 1_555 1_555 1_555 yes
   C(2)    Ti(1)   Ti(2)   C(10)   79.4(4)  1_555 1_555 1_555 1_555 yes
   C(2)    Ti(1)   C(1)    C(5)    116.6(8) 1_555 1_555 1_555 1_555 yes
   C(2)    Ti(1)   C(3)    C(4)    -113.9(8) 1_555 1_555 1_555 1_555 yes
   C(2)    Ti(1)   C(4)    C(3)    38.0(5)  1_555 1_555 1_555 1_555 yes
   C(2)    Ti(1)   C(4)    C(5)    -77.0(5) 1_555 1_555 1_555 1_555 yes
   C(2)    Ti(1)   C(5)    C(4)    80.1(5)  1_555 1_555 1_555 1_555 yes
   C(2)    C(1)    Ti(1)   C(3)    -36.9(5) 1_555 1_555 1_555 1_555 yes
   C(2)    C(1)    Ti(1)   C(4)    -79.7(6) 1_555 1_555 1_555 1_555 yes
   C(2)    C(1)    Ti(1)   C(5)    -116.6(8) 1_555 1_555 1_555 1_555 yes
   C(2)    C(1)    C(5)    C(4)    0.9(9)   1_555 1_555 1_555 1_555 yes
   C(2)    C(3)    Ti(1)   C(4)    113.9(8) 1_555 1_555 1_555 1_555 yes
   C(2)    C(3)    Ti(1)   C(5)    76.7(5)  1_555 1_555 1_555 1_555 yes
   C(2)    C(3)    C(4)    C(5)    -0.3(9)  1_555 1_555 1_555 1_555 yes
   C(3)    Ti(1)   Ru(1)   C(11)   -9.4(5)  1_555 1_555 1_555 1_555 yes
   C(3)    Ti(1)   Ru(1)   C(12)   -43.2(5) 1_555 1_555 1_555 1_555 yes
   C(3)    Ti(1)   Ru(1)   C(13)   -83.3(5) 1_555 1_555 1_555 1_555 yes
   C(3)    Ti(1)   Ru(1)   C(14)   -117.1(5) 1_555 1_555 1_555 1_555 yes
   C(3)    Ti(1)   Ru(1)   C(15)   -41(2)   1_555 1_555 1_555 1_555 yes
   C(3)    Ti(1)   Ru(2)   C(21)   -60.8(7) 1_555 1_555 1_555 1_555 yes
   C(3)    Ti(1)   Ru(2)   C(22)   61.0(5)  1_555 1_555 1_555 1_555 yes
   C(3)    Ti(1)   Ru(2)   C(23)   33.7(4)  1_555 1_555 1_555 1_555 yes
   C(3)    Ti(1)   Ru(2)   C(24)   -5.0(4)  1_555 1_555 1_555 1_555 yes
   C(3)    Ti(1)   Ru(2)   C(25)   -42.3(4) 1_555 1_555 1_555 1_555 yes
   C(3)    Ti(1)   Ti(2)   C(6)    74(1)    1_555 1_555 1_555 1_555 yes
   C(3)    Ti(1)   Ti(2)   C(7)    5.1(5)   1_555 1_555 1_555 1_555 yes
   C(3)    Ti(1)   Ti(2)   C(8)    36.6(5)  1_555 1_555 1_555 1_555 yes
   C(3)    Ti(1)   Ti(2)   C(9)    75.3(5)  1_555 1_555 1_555 1_555 yes
   C(3)    Ti(1)   Ti(2)   C(10)   108.7(5) 1_555 1_555 1_555 1_555 yes
   C(3)    Ti(1)   C(1)    C(5)    79.8(6)  1_555 1_555 1_555 1_555 yes
   C(3)    Ti(1)   C(4)    C(5)    -115.0(8) 1_555 1_555 1_555 1_555 yes
   C(3)    Ti(1)   C(5)    C(4)    38.7(5)  1_555 1_555 1_555 1_555 yes
   C(3)    C(2)    Ti(1)   C(4)    -39.2(5) 1_555 1_555 1_555 1_555 yes
   C(3)    C(2)    Ti(1)   C(5)    -80.5(6) 1_555 1_555 1_555 1_555 yes
   C(3)    C(2)    C(1)    C(5)    -1.1(10) 1_555 1_555 1_555 1_555 yes
   C(3)    C(4)    Ti(1)   C(5)    115.0(8) 1_555 1_555 1_555 1_555 yes
   C(4)    Ti(1)   Ru(1)   C(11)   26.6(4)  1_555 1_555 1_555 1_555 yes
   C(4)    Ti(1)   Ru(1)   C(12)   -7.1(4)  1_555 1_555 1_555 1_555 yes
   C(4)    Ti(1)   Ru(1)   C(13)   -47.2(4) 1_555 1_555 1_555 1_555 yes
   C(4)    Ti(1)   Ru(1)   C(14)   -81.1(4) 1_555 1_555 1_555 1_555 yes
   C(4)    Ti(1)   Ru(1)   C(15)   -5(1)    1_555 1_555 1_555 1_555 yes
   C(4)    Ti(1)   Ru(2)   C(21)   -20.9(7) 1_555 1_555 1_555 1_555 yes
   C(4)    Ti(1)   Ru(2)   C(22)   100.8(5) 1_555 1_555 1_555 1_555 yes
   C(4)    Ti(1)   Ru(2)   C(23)   73.6(4)  1_555 1_555 1_555 1_555 yes
   C(4)    Ti(1)   Ru(2)   C(24)   34.8(4)  1_555 1_555 1_555 1_555 yes
   C(4)    Ti(1)   Ru(2)   C(25)   -2.4(4)  1_555 1_555 1_555 1_555 yes
   C(4)    Ti(1)   Ti(2)   C(6)    -26(2)   1_555 1_555 1_555 1_555 yes
   C(4)    Ti(1)   Ti(2)   C(7)    -95(1)   1_555 1_555 1_555 1_555 yes
   C(4)    Ti(1)   Ti(2)   C(8)    -64(1)   1_555 1_555 1_555 1_555 yes
   C(4)    Ti(1)   Ti(2)   C(9)    -25(1)   1_555 1_555 1_555 1_555 yes
   C(4)    Ti(1)   Ti(2)   C(10)   8(1)     1_555 1_555 1_555 1_555 yes
   C(4)    Ti(1)   C(1)    C(5)    37.0(5)  1_555 1_555 1_555 1_555 yes
   C(4)    C(3)    Ti(1)   C(5)    -37.2(5) 1_555 1_555 1_555 1_555 yes
   C(5)    Ti(1)   Ru(1)   C(11)   67.0(4)  1_555 1_555 1_555 1_555 yes
   C(5)    Ti(1)   Ru(1)   C(12)   33.3(4)  1_555 1_555 1_555 1_555 yes
   C(5)    Ti(1)   Ru(1)   C(13)   -6.8(4)  1_555 1_555 1_555 1_555 yes
   C(5)    Ti(1)   Ru(1)   C(14)   -40.7(4) 1_555 1_555 1_555 1_555 yes
   C(5)    Ti(1)   Ru(1)   C(15)   35(1)    1_555 1_555 1_555 1_555 yes
   C(5)    Ti(1)   Ru(2)   C(21)   6.0(9)   1_555 1_555 1_555 1_555 yes
   C(5)    Ti(1)   Ru(2)   C(22)   127.7(8) 1_555 1_555 1_555 1_555 yes
   C(5)    Ti(1)   Ru(2)   C(23)   100.5(7) 1_555 1_555 1_555 1_555 yes
   C(5)    Ti(1)   Ru(2)   C(24)   61.8(7)  1_555 1_555 1_555 1_555 yes
   C(5)    Ti(1)   Ru(2)   C(25)   24.5(7)  1_555 1_555 1_555 1_555 yes
   C(5)    Ti(1)   Ti(2)   C(6)    -26(1)   1_555 1_555 1_555 1_555 yes
   C(5)    Ti(1)   Ti(2)   C(7)    -95.4(4) 1_555 1_555 1_555 1_555 yes
   C(5)    Ti(1)   Ti(2)   C(8)    -64.0(4) 1_555 1_555 1_555 1_555 yes
   C(5)    Ti(1)   Ti(2)   C(9)    -25.3(4) 1_555 1_555 1_555 1_555 yes
   C(5)    Ti(1)   Ti(2)   C(10)   8.2(5)   1_555 1_555 1_555 1_555 yes
   C(6)    Ti(2)   Ru(1)   C(11)   -30.0(5) 1_555 1_555 1_555 1_555 yes
   C(6)    Ti(2)   Ru(1)   C(12)   92.3(6)  1_555 1_555 1_555 1_555 yes
   C(6)    Ti(2)   Ru(1)   C(13)   71.9(3)  1_555 1_555 1_555 1_555 yes
   C(6)    Ti(2)   Ru(1)   C(14)   34.2(3)  1_555 1_555 1_555 1_555 yes
   C(6)    Ti(2)   Ru(1)   C(15)   -4.7(3)  1_555 1_555 1_555 1_555 yes
   C(6)    Ti(2)   Ru(2)   C(21)   11.3(3)  1_555 1_555 1_555 1_555 yes
   C(6)    Ti(2)   Ru(2)   C(22)   -25.4(3) 1_555 1_555 1_555 1_555 yes
   C(6)    Ti(2)   Ru(2)   C(23)   -65.5(3) 1_555 1_555 1_555 1_555 yes
   C(6)    Ti(2)   Ru(2)   C(24)   -96.1(4) 1_555 1_555 1_555 1_555 yes
   C(6)    Ti(2)   Ru(2)   C(25)   24.3(9)  1_555 1_555 1_555 1_555 yes
   C(6)    Ti(2)   C(7)    C(8)    -115.3(7) 1_555 1_555 1_555 1_555 yes
   C(6)    Ti(2)   C(8)    C(7)    37.2(4)  1_555 1_555 1_555 1_555 yes
   C(6)    Ti(2)   C(8)    C(9)    -78.7(5) 1_555 1_555 1_555 1_555 yes
   C(6)    Ti(2)   C(9)    C(8)    78.6(5)  1_555 1_555 1_555 1_555 yes
   C(6)    Ti(2)   C(9)    C(10)   -37.5(4) 1_555 1_555 1_555 1_555 yes
   C(6)    Ti(2)   C(10)   C(9)    114.5(7) 1_555 1_555 1_555 1_555 yes
   C(6)    C(7)    Ti(2)   C(8)    115.3(7) 1_555 1_555 1_555 1_555 yes
   C(6)    C(7)    Ti(2)   C(9)    78.3(5)  1_555 1_555 1_555 1_555 yes
   C(6)    C(7)    Ti(2)   C(10)   36.1(4)  1_555 1_555 1_555 1_555 yes
   C(6)    C(7)    C(8)    C(9)    -1.4(9)  1_555 1_555 1_555 1_555 yes
   C(6)    C(10)   Ti(2)   C(7)    -36.0(4) 1_555 1_555 1_555 1_555 yes
   C(6)    C(10)   Ti(2)   C(8)    -77.8(5) 1_555 1_555 1_555 1_555 yes
   C(6)    C(10)   Ti(2)   C(9)    -114.5(7) 1_555 1_555 1_555 1_555 yes
   C(6)    C(10)   C(9)    C(8)    0.5(9)   1_555 1_555 1_555 1_555 yes
   C(7)    Ti(2)   Ru(1)   C(11)   -0.7(6)  1_555 1_555 1_555 1_555 yes
   C(7)    Ti(2)   Ru(1)   C(12)   121.6(7) 1_555 1_555 1_555 1_555 yes
   C(7)    Ti(2)   Ru(1)   C(13)   101.2(5) 1_555 1_555 1_555 1_555 yes
   C(7)    Ti(2)   Ru(1)   C(14)   63.5(5)  1_555 1_555 1_555 1_555 yes
   C(7)    Ti(2)   Ru(1)   C(15)   24.6(5)  1_555 1_555 1_555 1_555 yes
   C(7)    Ti(2)   Ru(2)   C(21)   51.4(3)  1_555 1_555 1_555 1_555 yes
   C(7)    Ti(2)   Ru(2)   C(22)   14.7(3)  1_555 1_555 1_555 1_555 yes
   C(7)    Ti(2)   Ru(2)   C(23)   -25.4(3) 1_555 1_555 1_555 1_555 yes
   C(7)    Ti(2)   Ru(2)   C(24)   -56.0(4) 1_555 1_555 1_555 1_555 yes
   C(7)    Ti(2)   Ru(2)   C(25)   64.4(9)  1_555 1_555 1_555 1_555 yes
   C(7)    Ti(2)   C(6)    C(10)   118.0(7) 1_555 1_555 1_555 1_555 yes
   C(7)    Ti(2)   C(8)    C(9)    -115.8(7) 1_555 1_555 1_555 1_555 yes
   C(7)    Ti(2)   C(9)    C(8)    37.8(4)  1_555 1_555 1_555 1_555 yes
   C(7)    Ti(2)   C(9)    C(10)   -78.4(5) 1_555 1_555 1_555 1_555 yes
   C(7)    Ti(2)   C(10)   C(9)    78.5(5)  1_555 1_555 1_555 1_555 yes
   C(7)    C(6)    Ti(2)   C(8)    -38.1(4) 1_555 1_555 1_555 1_555 yes
   C(7)    C(6)    Ti(2)   C(9)    -79.3(5) 1_555 1_555 1_555 1_555 yes
   C(7)    C(6)    Ti(2)   C(10)   -118.0(7) 1_555 1_555 1_555 1_555 yes
   C(7)    C(6)    C(10)   C(9)    -1.4(9)  1_555 1_555 1_555 1_555 yes
   C(7)    C(8)    Ti(2)   C(9)    115.8(7) 1_555 1_555 1_555 1_555 yes
   C(7)    C(8)    Ti(2)   C(10)   78.1(5)  1_555 1_555 1_555 1_555 yes
   C(7)    C(8)    C(9)    C(10)   0.5(9)   1_555 1_555 1_555 1_555 yes
   C(8)    Ti(2)   Ru(1)   C(11)   -126.0(9) 1_555 1_555 1_555 1_555 yes
   C(8)    Ti(2)   Ru(1)   C(12)   -3(1)    1_555 1_555 1_555 1_555 yes
   C(8)    Ti(2)   Ru(1)   C(13)   -24.2(8) 1_555 1_555 1_555 1_555 yes
   C(8)    Ti(2)   Ru(1)   C(14)   -61.8(8) 1_555 1_555 1_555 1_555 yes
   C(8)    Ti(2)   Ru(1)   C(15)   -100.7(8) 1_555 1_555 1_555 1_555 yes
   C(8)    Ti(2)   Ru(2)   C(21)   91.4(4)  1_555 1_555 1_555 1_555 yes
   C(8)    Ti(2)   Ru(2)   C(22)   54.7(3)  1_555 1_555 1_555 1_555 yes
   C(8)    Ti(2)   Ru(2)   C(23)   14.5(3)  1_555 1_555 1_555 1_555 yes
   C(8)    Ti(2)   Ru(2)   C(24)   -16.0(4) 1_555 1_555 1_555 1_555 yes
   C(8)    Ti(2)   Ru(2)   C(25)   104.4(9) 1_555 1_555 1_555 1_555 yes
   C(8)    Ti(2)   C(6)    C(10)   79.9(5)  1_555 1_555 1_555 1_555 yes
   C(8)    Ti(2)   C(9)    C(10)   -116.2(7) 1_555 1_555 1_555 1_555 yes
   C(8)    Ti(2)   C(10)   C(9)    36.7(4)  1_555 1_555 1_555 1_555 yes
   C(8)    C(7)    Ti(2)   C(9)    -37.0(4) 1_555 1_555 1_555 1_555 yes
   C(8)    C(7)    Ti(2)   C(10)   -79.2(5) 1_555 1_555 1_555 1_555 yes
   C(8)    C(7)    C(6)    C(10)   1.8(9)   1_555 1_555 1_555 1_555 yes
   C(8)    C(9)    Ti(2)   C(10)   116.2(7) 1_555 1_555 1_555 1_555 yes
   C(9)    Ti(2)   Ru(1)   C(11)   -106.0(5) 1_555 1_555 1_555 1_555 yes
   C(9)    Ti(2)   Ru(1)   C(12)   16.3(7)  1_555 1_555 1_555 1_555 yes
   C(9)    Ti(2)   Ru(1)   C(13)   -4.1(4)  1_555 1_555 1_555 1_555 yes
   C(9)    Ti(2)   Ru(1)   C(14)   -41.8(4) 1_555 1_555 1_555 1_555 yes
   C(9)    Ti(2)   Ru(1)   C(15)   -80.7(4) 1_555 1_555 1_555 1_555 yes
   C(9)    Ti(2)   Ru(2)   C(21)   124.4(8) 1_555 1_555 1_555 1_555 yes
   C(9)    Ti(2)   Ru(2)   C(22)   87.7(8)  1_555 1_555 1_555 1_555 yes
   C(9)    Ti(2)   Ru(2)   C(23)   47.6(8)  1_555 1_555 1_555 1_555 yes
   C(9)    Ti(2)   Ru(2)   C(24)   17.1(9)  1_555 1_555 1_555 1_555 yes
   C(9)    Ti(2)   Ru(2)   C(25)   137(1)   1_555 1_555 1_555 1_555 yes
   C(9)    Ti(2)   C(6)    C(10)   38.7(5)  1_555 1_555 1_555 1_555 yes
   C(9)    C(8)    Ti(2)   C(10)   -37.8(5) 1_555 1_555 1_555 1_555 yes
   C(10)   Ti(2)   Ru(1)   C(11)   -68.4(5) 1_555 1_555 1_555 1_555 yes
   C(10)   Ti(2)   Ru(1)   C(12)   53.9(6)  1_555 1_555 1_555 1_555 yes
   C(10)   Ti(2)   Ru(1)   C(13)   33.4(4)  1_555 1_555 1_555 1_555 yes
   C(10)   Ti(2)   Ru(1)   C(14)   -4.2(3)  1_555 1_555 1_555 1_555 yes
   C(10)   Ti(2)   Ru(1)   C(15)   -43.1(3) 1_555 1_555 1_555 1_555 yes
   C(10)   Ti(2)   Ru(2)   C(21)   -24.3(5) 1_555 1_555 1_555 1_555 yes
   C(10)   Ti(2)   Ru(2)   C(22)   -61.0(5) 1_555 1_555 1_555 1_555 yes
   C(10)   Ti(2)   Ru(2)   C(23)   -101.1(5) 1_555 1_555 1_555 1_555 yes
   C(10)   Ti(2)   Ru(2)   C(24)   -131.6(6) 1_555 1_555 1_555 1_555 yes
   C(10)   Ti(2)   Ru(2)   C(25)   -11.3(10) 1_555 1_555 1_555 1_555 yes
   C(11)   Ru(1)   Ru(2)   C(21)   -27.0(3) 1_555 1_555 1_555 1_555 yes
   C(11)   Ru(1)   Ru(2)   C(22)   -63.8(3) 1_555 1_555 1_555 1_555 yes
   C(11)   Ru(1)   Ru(2)   C(23)   -52(2)   1_555 1_555 1_555 1_555 yes
   C(11)   Ru(1)   Ru(2)   C(24)   48.9(4)  1_555 1_555 1_555 1_555 yes
   C(11)   Ru(1)   Ru(2)   C(25)   14.0(3)  1_555 1_555 1_555 1_555 yes
   C(11)   Ru(1)   C(12)   C(13)   116.7(6) 1_555 1_555 1_555 1_555 yes
   C(11)   Ru(1)   C(12)   C(17)   -120.1(8) 1_555 1_555 1_555 1_555 yes
   C(11)   Ru(1)   C(13)   C(12)   -37.7(4) 1_555 1_555 1_555 1_555 yes
   C(11)   Ru(1)   C(13)   C(14)   80.6(4)  1_555 1_555 1_555 1_555 yes
   C(11)   Ru(1)   C(13)   C(18)   -158.0(8) 1_555 1_555 1_555 1_555 yes
   C(11)   Ru(1)   C(14)   C(13)   -78.3(4) 1_555 1_555 1_555 1_555 yes
   C(11)   Ru(1)   C(14)   C(15)   36.9(4)  1_555 1_555 1_555 1_555 yes
   C(11)   Ru(1)   C(14)   C(19)   160.7(8) 1_555 1_555 1_555 1_555 yes
   C(11)   Ru(1)   C(15)   C(14)   -117.8(6) 1_555 1_555 1_555 1_555 yes
   C(11)   Ru(1)   C(15)   C(20)   123.7(8) 1_555 1_555 1_555 1_555 yes
   C(11)   C(12)   Ru(1)   C(13)   -116.7(6) 1_555 1_555 1_555 1_555 yes
   C(11)   C(12)   Ru(1)   C(14)   -79.6(4) 1_555 1_555 1_555 1_555 yes
   C(11)   C(12)   Ru(1)   C(15)   -37.3(4) 1_555 1_555 1_555 1_555 yes
   C(11)   C(12)   C(13)   C(14)   1.5(7)   1_555 1_555 1_555 1_555 yes
   C(11)   C(12)   C(13)   C(18)   -174.0(6) 1_555 1_555 1_555 1_555 yes
   C(11)   C(15)   Ru(1)   C(12)   37.3(4)  1_555 1_555 1_555 1_555 yes
   C(11)   C(15)   Ru(1)   C(13)   79.1(4)  1_555 1_555 1_555 1_555 yes
   C(11)   C(15)   Ru(1)   C(14)   117.8(6) 1_555 1_555 1_555 1_555 yes
   C(11)   C(15)   C(14)   C(13)   3.0(7)   1_555 1_555 1_555 1_555 yes
   C(11)   C(15)   C(14)   C(19)   174.8(6) 1_555 1_555 1_555 1_555 yes
   C(12)   Ru(1)   Ru(2)   C(21)   -65.1(3) 1_555 1_555 1_555 1_555 yes
   C(12)   Ru(1)   Ru(2)   C(22)   -101.9(4) 1_555 1_555 1_555 1_555 yes
   C(12)   Ru(1)   Ru(2)   C(23)   -90(2)   1_555 1_555 1_555 1_555 yes
   C(12)   Ru(1)   Ru(2)   C(24)   10.7(4)  1_555 1_555 1_555 1_555 yes
   C(12)   Ru(1)   Ru(2)   C(25)   -24.2(3) 1_555 1_555 1_555 1_555 yes
   C(12)   Ru(1)   C(11)   C(15)   -117.2(6) 1_555 1_555 1_555 1_555 yes
   C(12)   Ru(1)   C(11)   C(16)   120.8(8) 1_555 1_555 1_555 1_555 yes
   C(12)   Ru(1)   C(13)   C(14)   118.3(6) 1_555 1_555 1_555 1_555 yes
   C(12)   Ru(1)   C(13)   C(18)   -120.3(9) 1_555 1_555 1_555 1_555 yes
   C(12)   Ru(1)   C(14)   C(13)   -36.3(4) 1_555 1_555 1_555 1_555 yes
   C(12)   Ru(1)   C(14)   C(15)   78.8(4)  1_555 1_555 1_555 1_555 yes
   C(12)   Ru(1)   C(14)   C(19)   -157.4(8) 1_555 1_555 1_555 1_555 yes
   C(12)   Ru(1)   C(15)   C(14)   -80.5(4) 1_555 1_555 1_555 1_555 yes
   C(12)   Ru(1)   C(15)   C(20)   161.0(8) 1_555 1_555 1_555 1_555 yes
   C(12)   C(11)   Ru(1)   C(13)   37.4(4)  1_555 1_555 1_555 1_555 yes
   C(12)   C(11)   Ru(1)   C(14)   80.0(4)  1_555 1_555 1_555 1_555 yes
   C(12)   C(11)   Ru(1)   C(15)   117.2(6) 1_555 1_555 1_555 1_555 yes
   C(12)   C(11)   C(15)   C(14)   -2.1(7)  1_555 1_555 1_555 1_555 yes
   C(12)   C(11)   C(15)   C(20)   171.0(6) 1_555 1_555 1_555 1_555 yes
   C(12)   C(13)   Ru(1)   C(14)   -118.3(6) 1_555 1_555 1_555 1_555 yes
   C(12)   C(13)   Ru(1)   C(15)   -79.9(4) 1_555 1_555 1_555 1_555 yes
   C(12)   C(13)   C(14)   C(15)   -2.8(7)  1_555 1_555 1_555 1_555 yes
   C(12)   C(13)   C(14)   C(19)   -174.8(6) 1_555 1_555 1_555 1_555 yes
   C(13)   Ru(1)   Ru(2)   C(21)   -87.8(9) 1_555 1_555 1_555 1_555 yes
   C(13)   Ru(1)   Ru(2)   C(22)   -124.6(9) 1_555 1_555 1_555 1_555 yes
   C(13)   Ru(1)   Ru(2)   C(23)   -112(2)  1_555 1_555 1_555 1_555 yes
   C(13)   Ru(1)   Ru(2)   C(24)   -12.0(9) 1_555 1_555 1_555 1_555 yes
   C(13)   Ru(1)   Ru(2)   C(25)   -46.9(9) 1_555 1_555 1_555 1_555 yes
   C(13)   Ru(1)   C(11)   C(15)   -79.8(4) 1_555 1_555 1_555 1_555 yes
   C(13)   Ru(1)   C(11)   C(16)   158.1(8) 1_555 1_555 1_555 1_555 yes
   C(13)   Ru(1)   C(12)   C(17)   123.2(9) 1_555 1_555 1_555 1_555 yes
   C(13)   Ru(1)   C(14)   C(15)   115.2(6) 1_555 1_555 1_555 1_555 yes
   C(13)   Ru(1)   C(14)   C(19)   -121.1(8) 1_555 1_555 1_555 1_555 yes
   C(13)   Ru(1)   C(15)   C(14)   -38.7(4) 1_555 1_555 1_555 1_555 yes
   C(13)   Ru(1)   C(15)   C(20)   -157.2(8) 1_555 1_555 1_555 1_555 yes
   C(13)   C(12)   Ru(1)   C(14)   37.1(4)  1_555 1_555 1_555 1_555 yes
   C(13)   C(12)   Ru(1)   C(15)   79.4(4)  1_555 1_555 1_555 1_555 yes
   C(13)   C(12)   C(11)   C(15)   0.4(7)   1_555 1_555 1_555 1_555 yes
   C(13)   C(12)   C(11)   C(16)   173.0(6) 1_555 1_555 1_555 1_555 yes
   C(13)   C(14)   Ru(1)   C(15)   -115.2(6) 1_555 1_555 1_555 1_555 yes
   C(13)   C(14)   C(15)   C(20)   -170.3(6) 1_555 1_555 1_555 1_555 yes
   C(14)   Ru(1)   Ru(2)   C(21)   47.2(4)  1_555 1_555 1_555 1_555 yes
   C(14)   Ru(1)   Ru(2)   C(22)   10.4(5)  1_555 1_555 1_555 1_555 yes
   C(14)   Ru(1)   Ru(2)   C(23)   22(2)    1_555 1_555 1_555 1_555 yes
   C(14)   Ru(1)   Ru(2)   C(24)   123.1(5) 1_555 1_555 1_555 1_555 yes
   C(14)   Ru(1)   Ru(2)   C(25)   88.1(4)  1_555 1_555 1_555 1_555 yes
   C(14)   Ru(1)   C(11)   C(15)   -37.2(4) 1_555 1_555 1_555 1_555 yes
   C(14)   Ru(1)   C(11)   C(16)   -159.2(8) 1_555 1_555 1_555 1_555 yes
   C(14)   Ru(1)   C(12)   C(17)   160.3(8) 1_555 1_555 1_555 1_555 yes
   C(14)   Ru(1)   C(13)   C(18)   121.4(9) 1_555 1_555 1_555 1_555 yes
   C(14)   Ru(1)   C(15)   C(20)   -118.5(8) 1_555 1_555 1_555 1_555 yes
   C(14)   C(13)   Ru(1)   C(15)   38.4(4)  1_555 1_555 1_555 1_555 yes
   C(14)   C(13)   C(12)   C(17)   174.8(6) 1_555 1_555 1_555 1_555 yes
   C(14)   C(15)   C(11)   C(16)   -174.5(6) 1_555 1_555 1_555 1_555 yes
   C(15)   Ru(1)   Ru(2)   C(21)   13.8(3)  1_555 1_555 1_555 1_555 yes
   C(15)   Ru(1)   Ru(2)   C(22)   -23.0(3) 1_555 1_555 1_555 1_555 yes
   C(15)   Ru(1)   Ru(2)   C(23)   -11(2)   1_555 1_555 1_555 1_555 yes
   C(15)   Ru(1)   Ru(2)   C(24)   89.7(4)  1_555 1_555 1_555 1_555 yes
   C(15)   Ru(1)   Ru(2)   C(25)   54.8(3)  1_555 1_555 1_555 1_555 yes
   C(15)   Ru(1)   C(11)   C(16)   -122.0(8) 1_555 1_555 1_555 1_555 yes
   C(15)   Ru(1)   C(12)   C(17)   -157.4(8) 1_555 1_555 1_555 1_555 yes
   C(15)   Ru(1)   C(13)   C(18)   159.8(8) 1_555 1_555 1_555 1_555 yes
   C(15)   Ru(1)   C(14)   C(19)   123.8(8) 1_555 1_555 1_555 1_555 yes
   C(15)   C(11)   C(12)   C(17)   -173.2(6) 1_555 1_555 1_555 1_555 yes
   C(15)   C(14)   C(13)   C(18)   172.6(6) 1_555 1_555 1_555 1_555 yes
   C(16)   C(11)   C(12)   C(17)   0(1)     1_555 1_555 1_555 1_555 yes
   C(16)   C(11)   C(15)   C(20)   -1(1)    1_555 1_555 1_555 1_555 yes
   C(17)   C(12)   C(13)   C(18)   0(1)     1_555 1_555 1_555 1_555 yes
   C(18)   C(13)   C(14)   C(19)   0(1)     1_555 1_555 1_555 1_555 yes
   C(19)   C(14)   C(15)   C(20)   1(1)     1_555 1_555 1_555 1_555 yes
   C(21)   Ru(2)   C(22)   C(23)   115.4(6) 1_555 1_555 1_555 1_555 yes
   C(21)   Ru(2)   C(22)   C(27)   -122.2(8) 1_555 1_555 1_555 1_555 yes
   C(21)   Ru(2)   C(23)   C(22)   -38.6(4) 1_555 1_555 1_555 1_555 yes
   C(21)   Ru(2)   C(23)   C(24)   80.1(4)  1_555 1_555 1_555 1_555 yes
   C(21)   Ru(2)   C(23)   C(28)   -158.4(8) 1_555 1_555 1_555 1_555 yes
   C(21)   Ru(2)   C(24)   C(23)   -79.2(4) 1_555 1_555 1_555 1_555 yes
   C(21)   Ru(2)   C(24)   C(25)   36.9(4)  1_555 1_555 1_555 1_555 yes
   C(21)   Ru(2)   C(24)   C(29)   158.5(7) 1_555 1_555 1_555 1_555 yes
   C(21)   Ru(2)   C(25)   C(24)   -117.7(6) 1_555 1_555 1_555 1_555 yes
   C(21)   Ru(2)   C(25)   C(30)   122.4(9) 1_555 1_555 1_555 1_555 yes
   C(21)   C(22)   Ru(2)   C(23)   -115.4(6) 1_555 1_555 1_555 1_555 yes
   C(21)   C(22)   Ru(2)   C(24)   -79.1(4) 1_555 1_555 1_555 1_555 yes
   C(21)   C(22)   Ru(2)   C(25)   -36.9(4) 1_555 1_555 1_555 1_555 yes
   C(21)   C(22)   C(23)   C(24)   2.8(7)   1_555 1_555 1_555 1_555 yes
   C(21)   C(22)   C(23)   C(28)   -170.9(6) 1_555 1_555 1_555 1_555 yes
   C(21)   C(25)   Ru(2)   C(22)   37.6(4)  1_555 1_555 1_555 1_555 yes
   C(21)   C(25)   Ru(2)   C(23)   79.9(4)  1_555 1_555 1_555 1_555 yes
   C(21)   C(25)   Ru(2)   C(24)   117.7(6) 1_555 1_555 1_555 1_555 yes
   C(21)   C(25)   C(24)   C(23)   3.0(7)   1_555 1_555 1_555 1_555 yes
   C(21)   C(25)   C(24)   C(29)   174.5(6) 1_555 1_555 1_555 1_555 yes
   C(22)   Ru(2)   C(21)   C(25)   -117.5(6) 1_555 1_555 1_555 1_555 yes
   C(22)   Ru(2)   C(21)   C(26)   119.5(9) 1_555 1_555 1_555 1_555 yes
   C(22)   Ru(2)   C(23)   C(24)   118.8(6) 1_555 1_555 1_555 1_555 yes
   C(22)   Ru(2)   C(23)   C(28)   -119.7(8) 1_555 1_555 1_555 1_555 yes
   C(22)   Ru(2)   C(24)   C(23)   -36.6(4) 1_555 1_555 1_555 1_555 yes
   C(22)   Ru(2)   C(24)   C(25)   79.5(4)  1_555 1_555 1_555 1_555 yes
   C(22)   Ru(2)   C(24)   C(29)   -158.9(7) 1_555 1_555 1_555 1_555 yes
   C(22)   Ru(2)   C(25)   C(24)   -80.1(4) 1_555 1_555 1_555 1_555 yes
   C(22)   Ru(2)   C(25)   C(30)   160.0(8) 1_555 1_555 1_555 1_555 yes
   C(22)   C(21)   Ru(2)   C(23)   38.3(4)  1_555 1_555 1_555 1_555 yes
   C(22)   C(21)   Ru(2)   C(24)   80.2(4)  1_555 1_555 1_555 1_555 yes
   C(22)   C(21)   Ru(2)   C(25)   117.5(6) 1_555 1_555 1_555 1_555 yes
   C(22)   C(21)   C(25)   C(24)   -1.3(7)  1_555 1_555 1_555 1_555 yes
   C(22)   C(21)   C(25)   C(30)   170.4(6) 1_555 1_555 1_555 1_555 yes
   C(22)   C(23)   Ru(2)   C(24)   -118.8(6) 1_555 1_555 1_555 1_555 yes
   C(22)   C(23)   Ru(2)   C(25)   -80.6(4) 1_555 1_555 1_555 1_555 yes
   C(22)   C(23)   C(24)   C(25)   -3.6(7)  1_555 1_555 1_555 1_555 yes
   C(22)   C(23)   C(24)   C(29)   -175.1(6) 1_555 1_555 1_555 1_555 yes
   C(23)   Ru(2)   C(21)   C(25)   -79.3(4) 1_555 1_555 1_555 1_555 yes
   C(23)   Ru(2)   C(21)   C(26)   157.8(8) 1_555 1_555 1_555 1_555 yes
   C(23)   Ru(2)   C(22)   C(27)   122.4(9) 1_555 1_555 1_555 1_555 yes
   C(23)   Ru(2)   C(24)   C(25)   116.1(5) 1_555 1_555 1_555 1_555 yes
   C(23)   Ru(2)   C(24)   C(29)   -122.3(8) 1_555 1_555 1_555 1_555 yes
   C(23)   Ru(2)   C(25)   C(24)   -37.8(4) 1_555 1_555 1_555 1_555 yes
   C(23)   Ru(2)   C(25)   C(30)   -157.7(8) 1_555 1_555 1_555 1_555 yes
   C(23)   C(22)   Ru(2)   C(24)   36.3(4)  1_555 1_555 1_555 1_555 yes
   C(23)   C(22)   Ru(2)   C(25)   78.5(4)  1_555 1_555 1_555 1_555 yes
   C(23)   C(22)   C(21)   C(25)   -0.9(7)  1_555 1_555 1_555 1_555 yes
   C(23)   C(22)   C(21)   C(26)   172.6(6) 1_555 1_555 1_555 1_555 yes
   C(23)   C(24)   Ru(2)   C(25)   -116.1(5) 1_555 1_555 1_555 1_555 yes
   C(23)   C(24)   C(25)   C(30)   -168.8(6) 1_555 1_555 1_555 1_555 yes
   C(24)   Ru(2)   C(21)   C(25)   -37.3(4) 1_555 1_555 1_555 1_555 yes
   C(24)   Ru(2)   C(21)   C(26)   -160.3(8) 1_555 1_555 1_555 1_555 yes
   C(24)   Ru(2)   C(22)   C(27)   158.8(8) 1_555 1_555 1_555 1_555 yes
   C(24)   Ru(2)   C(23)   C(28)   121.5(8) 1_555 1_555 1_555 1_555 yes
   C(24)   Ru(2)   C(25)   C(30)   -119.9(9) 1_555 1_555 1_555 1_555 yes
   C(24)   C(23)   Ru(2)   C(25)   38.1(4)  1_555 1_555 1_555 1_555 yes
   C(24)   C(23)   C(22)   C(27)   174.7(6) 1_555 1_555 1_555 1_555 yes
   C(24)   C(25)   C(21)   C(26)   -174.7(6) 1_555 1_555 1_555 1_555 yes
   C(25)   Ru(2)   C(21)   C(26)   -123.0(9) 1_555 1_555 1_555 1_555 yes
   C(25)   Ru(2)   C(22)   C(27)   -159.0(8) 1_555 1_555 1_555 1_555 yes
   C(25)   Ru(2)   C(23)   C(28)   159.6(8) 1_555 1_555 1_555 1_555 yes
   C(25)   Ru(2)   C(24)   C(29)   121.6(8) 1_555 1_555 1_555 1_555 yes
   C(25)   C(21)   C(22)   C(27)   -172.7(6) 1_555 1_555 1_555 1_555 yes
   C(25)   C(24)   C(23)   C(28)   170.0(6) 1_555 1_555 1_555 1_555 yes
   C(26)   C(21)   C(22)   C(27)   0(1)     1_555 1_555 1_555 1_555 yes
   C(26)   C(21)   C(25)   C(30)   -2(1)    1_555 1_555 1_555 1_555 yes
   C(27)   C(22)   C(23)   C(28)   0(1)     1_555 1_555 1_555 1_555 yes
   C(28)   C(23)   C(24)   C(29)   -1(1)    1_555 1_555 1_555 1_555 yes
   C(29)   C(24)   C(25)   C(30)   2(1)     1_555 1_555 1_555 1_555 yes
#------------------------------------------------------------------------------
loop_
_geom_contact_atom_site_label_1
_geom_contact_atom_site_label_2
_geom_contact_distance
_geom_contact_site_symmetry_1
_geom_contact_site_symmetry_2
_geom_contact_publ_flag
 Ru(1)     Ru(2)     2.8136(8)  1_555 1_555 ?
 Ru(1)     Ti(1)     3.002(1)   1_555 1_555 ?
 Ru(1)     Ti(2)     2.975(1)   1_555 1_555 ?
 Ru(2)     Ti(1)     2.964(1)   1_555 1_555 ?
 Ru(2)     Ti(2)     3.003(1)   1_555 1_555 ?
 Ti(1)     Ti(2)     3.105(2)   1_555 1_555 ?
 F(1)      C(24)     3.209(8)   1_555 4_454 ?
 F(1)      C(36)     3.38(1)    1_555 1_565 ?
 F(1)      C(23)     3.448(8)   1_555 4_454 ?
 F(1)      C(25)     3.451(8)   1_555 4_454 ?
 F(1)      C(29)     3.485(9)   1_555 4_454 ?
 F(2)      C(6)      3.470(10)  1_555 3_565 ?
 F(2)      C(21)     3.587(9)   1_555 4_454 ?
 F(3)      C(17)     3.506(9)   1_555 1_565 ?
 F(3)      C(36)     3.60(1)    1_555 1_565 ?
 F(4)      C(10)     3.47(1)    1_555 3_565 ?
 F(4)      C(19)     3.513(10)  1_555 3_565 ?
 F(4)      C(6)      3.520(9)   1_555 3_565 ?
 F(4)      C(19)     3.547(10)  1_555 1_555 ?
 F(4)      F(4)      3.563(10)  1_555 3_565 ?
 F(5)      C(10)     3.56(1)    1_555 1_555 ?
 F(6)      C(22)     3.109(8)   1_555 4_454 ?
 F(6)      C(27)     3.290(9)   1_555 4_454 ?
 F(6)      C(23)     3.303(8)   1_555 4_454 ?
 F(6)      C(21)     3.546(8)   1_555 4_454 ?
 F(8)      C(17)     3.42(1)    1_555 1_565 ?
 F(9)      C(4)      3.37(1)    1_555 1_565 ?
 F(9)      C(29)     3.38(1)    1_555 3_665 ?
 F(10)     C(8)      3.55(1)    1_555 1_555 ?
 F(10)     C(35)     3.56(1)    1_555 4_555 ?
 F(11)     C(2)      3.26(1)    1_555 3_665 ?
 F(11)     C(3)      3.53(1)    1_555 3_665 ?
 F(12)     C(8)      3.31(1)    1_555 1_555 ?
 F(12)     C(1)      3.41(1)    1_555 1_555 ?
 F(12)     C(2)      3.52(1)    1_555 1_555 ?
 F(12)     C(9)      3.56(1)    1_555 1_555 ?
 O(1)      C(5)      3.37(1)    1_555 1_555 ?
 O(1)      C(36)     3.50(1)    1_555 1_555 ?
 O(1)      C(17)     3.59(1)    1_555 1_555 ?
 O(2)      C(7)      3.371(9)   1_555 4_454 ?
 O(2)      C(27)     3.58(1)    1_555 4_454 ?
 C(5)      C(31)     3.58(2)    1_555 1_555 ?
 C(26)     C(27)     3.58(1)    1_555 2_545 ?
#------------------------------------------------------------------------------

_publ_contact_author_name           ' Masanobu Hidai'

_publ_contact_author_address
;
    Department of Chemistry and Biotechnology, Graduate School of Engineering, The University of Tokyo, Hongo, Bunkyo-ku, Tokyo 113-8656, Japan
;
_publ_contact_author_email            ' hidai@chembio.t.u-tokyo.ac.jp '
_publ_contact_author_fax              ' +81-3-5800-6945 '
_publ_contact_author_phone            ' +81-3-3812-2111 '
_publ_contact_letter
;
    -
;
_publ_requested_journal               ' Journal of the American Chemical Society'
_publ_requested_category              ' -'

_publ_requested_coeditor_name          ?

_publ_section_title
;
    Electron-Deficient Early-Late Heterobimetallic Sulfido Clusters.  Unusual Reactivities of Ti2Ru2S4 Cubane-Type Clusters with Four Cyclopentadienyl Coligands
;

_publ_section_title_footnote
;
    -
;
loop_
_publ_author_name
_publ_author_footnote
_publ_author_address' Shin-ichiro Kabashima '
;
  Department of Chemistry and Biotechnology, Graduate School of Engineering, The University of Tokyo, Hongo, Bunkyo-ku, Tokyo 113-8656, Japan
;

_publ_section_synopsis
;
    -
;

_publ_section_abstract
;
    -
;

_publ_section_comment
;
    -
;

_publ_section_acknowledgements
;
    -
;

_publ_section_experimental
;
    -
;

_publ_section_references
;
Molecular Structure Corporation, Rigaku Corporation. (1998). teXsan. 
Single Crystal Structure Analysis Software. Version 1.9.
MSC, 3200 Research Forest Drive, The Woodlands, TX 77381, USA.
Rigaku, 3-9-12 Akishima, Tokyo, Japan.
North, A.C.T., Phillips, D. C. & Mathews, F. S. (1968).
Acta Cryst. A24, 351-359.
Zachariasen, W. H. (1967). Acta Cryst. 23, 558-564.
;

_publ_section_table_legends
;
    -
;

_publ_section_figure_captions
;
    -
;

_publ_section_exptl_prep
;
    -
;

_publ_section_exptl_refinement
;
    -
;


data_[(CpTiCl2)(CpTi)(Cp*Ru)2S4].CH2Cl2(6.CH2Cl2)
#------------------------------------------------------------------------------
_audit_creation_date                  'Wed Dec 16 20:53:28 1998'
_audit_creation_method                'from TEXRAY.INF file'
_audit_update_record                   ?
#------------------------------------------------------------------------------
_computing_data_collection            'Rigaku/AFC Diffractometer Control'
_computing_cell_refinement            'Rigaku/AFC Diffractometer Control'
_computing_data_reduction             'teXsan'
_computing_structure_solution          'DIRDIF92 (PATTY)'
_computing_structure_refinement       'teXsan'
_computing_publication_material       'teXsan'
_computing_molecular_graphics          ?
#------------------------------------------------------------------------------
_chemical_compound_source              ?
_chemical_name_common                  ?
_chemical_formula_weight               982.66
_chemical_formula_analytical           ?
_chemical_formula_sum                  'C31 H42 Cl4 S4 Ru2 Ti2 '
_chemical_formula_moiety               '?'
_chemical_formula_structural           ?
_chemical_melting_point                ?
#------------------------------------------------------------------------------
_cell_length_a                         10.398(4)
_cell_length_b                         18.263(5)
_cell_length_c                         19.474(4)
_cell_angle_alpha                      90
_cell_angle_beta                       92.55(3)
_cell_angle_gamma                      90
_cell_volume                           3694(1)
_cell_formula_units_Z                  4
_cell_measurement_temperature          296.2
_cell_measurement_reflns_used          25
_cell_measurement_theta_min            19.5
_cell_measurement_theta_max            20.0
#------------------------------------------------------------------------------
_symmetry_cell_setting                 monoclinic
_symmetry_space_group_name_H-M        'P 21/n       '
_symmetry_Int_Tables_number            14
_symmetry_space_group_name_Hall        ?
loop_
_symmetry_equiv_pos_as_xyz
x,y,z
1/2-x,1/2+y,1/2-z
-x,-y,-z
1/2+x,1/2-y,1/2+z
#------------------------------------------------------------------------------
_exptl_crystal_description            'prismatic'
_exptl_crystal_colour                 'darkbrown'
_exptl_crystal_size_max                0.700
_exptl_crystal_size_mid                0.200
_exptl_crystal_size_min                0.100
_exptl_crystal_density_diffrn          1.767
_exptl_crystal_density_method         'not measured'
_exptl_crystal_F_000                   1968.00
_exptl_absorpt_coefficient_mu          1.756
_exptl_absorpt_correction_type         psi-scan
_exptl_absorpt_process_details        '(North, Phillips & Mathews, 1968)'
_exptl_absorpt_correction_T_min        0.741
_exptl_absorpt_correction_T_max        1.000
_exptl_special_details
;
 ?
;
#------------------------------------------------------------------------------
_diffrn_special_details
;
 ?
;
_diffrn_ambient_temperature            296.2
_diffrn_radiation_wavelength           0.7107
_diffrn_radiation_type                'Mo K\a'
_diffrn_radiation_source              'Rigaku rotating anode'
_diffrn_radiation_monochromator        graphite
_diffrn_radiation_detector            'scintillation counter'
_diffrn_measurement_device_type       'Rigaku AFC7R'
_diffrn_measurement_method             \w-2\q

_diffrn_standards_number              3
_diffrn_standards_interval_count      150
_diffrn_standards_decay_%             -0.48
loop_
_diffrn_standard_refln_index_h
_diffrn_standard_refln_index_k
_diffrn_standard_refln_index_l
      1      -2      1
      0      -2      3
      1      -3      2
_diffrn_reflns_number                  8933
_reflns_number_total                   8478
_reflns_number_gt                      4063
_reflns_observed_expression             >2.0sigma(I)
_diffrn_reflns_av_R_equivalents        0.098
_diffrn_reflns_av_sigmaI/netI          0.131
_diffrn_reflns_limit_h_min             0
_diffrn_reflns_limit_h_max             13
_diffrn_reflns_limit_k_min             0
_diffrn_reflns_limit_k_max             23
_diffrn_reflns_limit_l_min             -25
_diffrn_reflns_limit_l_max             25
_diffrn_reflns_theta_min               2.52
_diffrn_reflns_theta_max               27.49
_diffrn_reflns_reduction_process      'Lp corrections applied'
_diffrn_orient_matrix_UB_11           -0.00712
_diffrn_orient_matrix_UB_12           -0.00942
_diffrn_orient_matrix_UB_13            0.05027
_diffrn_orient_matrix_UB_21           -0.00186
_diffrn_orient_matrix_UB_22           -0.05391
_diffrn_orient_matrix_UB_23           -0.00898
_diffrn_orient_matrix_UB_31            0.09599
_diffrn_orient_matrix_UB_32           -0.00174
_diffrn_orient_matrix_UB_33            0.00585
#------------------------------------------------------------------------------
loop_
_atom_type_symbol
_atom_type_description
_atom_type_scat_dispersion_real
_atom_type_scat_imag
_atom_type_scat_source
  'C'  'C'   0.003 0.002 
;International Tables for Crystallography
(1992, Vol. C, Tables 4.2.6.8 and 6.1.1.1)
;
  'H'  'H'   0.000 0.000 
;International Tables for Crystallography
(1992, Vol. C, Table 6.1.1.2)
;
  'S'  'S'   0.125 0.123 
;International Tables for Crystallography
(1992, Vol. C, Tables 4.2.6.8 and 6.1.1.1)
;
  'ClCl'   0.148 0.159 
;International Tables for Crystallography
(1992, Vol. C, Tables 4.2.6.8 and 6.1.1.1)
;
  'TiTi'   0.278 0.446 
;International Tables for Crystallography
(1992, Vol. C, Tables 4.2.6.8 and 6.1.1.1)
;
  'RuRu'   -1.259 0.836 
;International Tables for Crystallography
(1992, Vol. C, Tables 4.2.6.8 and 6.1.1.1)
;
#------------------------------------------------------------------------------
loop_
_atom_site_label
_atom_site_type_symbol
_atom_site_fract_x
_atom_site_fract_y
_atom_site_fract_z
_atom_site_U_iso_or_equiv
_atom_site_adp_type
_atom_site_occupancy
_atom_site_calc_flags
_atom_site_refinement_flags
_atom_site_disorder_assembly
_atom_site_disorder_group
 Ru(1)  Ru 0.53360(6)  0.19860(5)  0.84273(3)  0.0261(2)   Uani 1.00 d ...
 Ru(2)  Ru 0.72094(6)  0.30308(5)  0.88220(3)  0.0243(2)   Uani 1.00 d ...
 Ti(1)  Ti 0.3904(1)   0.39266(9)  0.85075(8)  0.0313(5)   Uani 1.00 d ...
 Ti(2)  Ti 0.5098(1)   0.27024(9)  0.97469(8)  0.0314(5)   Uani 1.00 d ...
 Cl(1)  Cl 0.2801(2)   0.3600(2)   0.7438(1)   0.0531(9)   Uani 1.00 d ...
 Cl(2)  Cl 0.5150(2)   0.4843(1)   0.7942(1)   0.0500(8)   Uani 1.00 d ...
 Cl(3)  Cl 0.6101(4)   0.3912(3)   0.5911(2)   0.130(2)    Uani 1.00 d ...
 Cl(4)  Cl 0.3522(4)   0.4338(3)   0.5545(2)   0.178(3)    Uani 1.00 d ...
 S(1)   S  0.3545(2)   0.2611(1)   0.8874(1)   0.0308(7)   Uani 1.00 d ...
 S(2)   S  0.5776(2)   0.3828(1)   0.9381(1)   0.0304(7)   Uani 1.00 d ...
 S(3)   S  0.5622(2)   0.3135(1)   0.7955(1)   0.0278(6)   Uani 1.00 d ...
 S(4)   S  0.6707(2)   0.1966(1)   0.9394(1)   0.0325(7)   Uani 1.00 d ...
 C(1)   C  0.226(1)    0.4835(8)   0.8531(6)   0.073(5)    Uani 1.00 d ...
 C(2)   C  0.1719(9)   0.4191(8)   0.8745(8)   0.070(5)    Uani 1.00 d ...
 C(3)   C  0.233(1)    0.4051(7)   0.9345(8)   0.069(5)    Uani 1.00 d ...
 C(4)   C  0.318(1)    0.4531(9)   0.9520(7)   0.073(5)    Uani 1.00 d ...
 C(5)   C  0.319(1)    0.5039(7)   0.9025(9)   0.078(5)    Uani 1.00 d ...
 C(6)   C  0.546(2)    0.211(1)    1.0826(6)   0.092(6)    Uani 1.00 d ...
 C(7)   C  0.550(1)    0.285(1)    1.0931(6)   0.081(5)    Uani 1.00 d ...
 C(8)   C  0.434(2)    0.3142(7)   1.0794(5)   0.067(4)    Uani 1.00 d ...
 C(9)   C  0.3527(10)  0.2588(9)   1.0579(5)   0.067(4)    Uani 1.00 d ...
 C(10)  C  0.423(2)    0.1942(8)   1.0596(6)   0.082(5)    Uani 1.00 d ...
 C(11)  C  0.4071(9)   0.1060(5)   0.8090(5)   0.036(3)    Uani 1.00 d ...
 C(12)  C  0.5144(10)  0.0758(5)   0.8427(5)   0.041(3)    Uani 1.00 d ...
 C(13)  C  0.6253(9)   0.0967(5)   0.8054(5)   0.040(3)    Uani 1.00 d ...
 C(14)  C  0.5804(9)   0.1383(5)   0.7475(5)   0.040(3)    Uani 1.00 d ...
 C(15)  C  0.4441(10)  0.1456(5)   0.7521(5)   0.042(3)    Uani 1.00 d ...
 C(16)  C  0.2693(10)  0.0925(6)   0.8294(5)   0.066(4)    Uani 1.00 d ...
 C(17)  C  0.516(1)    0.0254(6)   0.9036(6)   0.068(4)    Uani 1.00 d ...
 C(18)  C  0.760(1)    0.0708(6)   0.8202(6)   0.076(5)    Uani 1.00 d ...
 C(19)  C  0.656(1)    0.1667(6)   0.6889(5)   0.072(4)    Uani 1.00 d ...
 C(20)  C  0.356(1)    0.1802(6)   0.6972(5)   0.067(4)    Uani 1.00 d ...
 C(21)  C  0.8957(8)   0.3462(6)   0.9328(5)   0.037(3)    Uani 1.00 d ...
 C(22)  C  0.9326(7)   0.2796(5)   0.9042(5)   0.034(3)    Uani 1.00 d ...
 C(23)  C  0.9158(7)   0.2859(5)   0.8314(4)   0.035(3)    Uani 1.00 d ...
 C(24)  C  0.8691(7)   0.3574(5)   0.8172(4)   0.032(3)    Uani 1.00 d ...
 C(25)  C  0.8571(8)   0.3957(6)   0.8805(5)   0.038(3)    Uani 1.00 d ...
 C(26)  C  0.9128(9)   0.3658(7)   1.0084(5)   0.077(4)    Uani 1.00 d ...
 C(27)  C  0.9916(9)   0.2159(6)   0.9418(5)   0.072(4)    Uani 1.00 d ...
 C(28)  C  0.9646(9)   0.2328(6)   0.7789(5)   0.068(4)    Uani 1.00 d ...
 C(29)  C  0.8502(9)   0.3887(7)   0.7461(5)   0.068(4)    Uani 1.00 d ...
 C(30)  C  0.8330(9)   0.4760(6)   0.8857(6)   0.063(4)    Uani 1.00 d ...
 C(31)  C  0.472(1)    0.4374(10)  0.6108(7)   0.136(7)    Uani 1.00 d ...
 H(1)   H  0.2041      0.5093      0.8119      0.0872      Uiso 1.00 calc ...
 H(2)   H  0.1060      0.3911      0.8516      0.0835      Uiso 1.00 calc ...
 H(3)   H  0.2148      0.3636      0.9618      0.0835      Uiso 1.00 calc ...
 H(4)   H  0.3716      0.4525      0.9929      0.0879      Uiso 1.00 calc ...
 H(5)   H  0.3735      0.5459      0.9015      0.0934      Uiso 1.00 calc ...
 H(6)   H  0.6152      0.1780      1.0900      0.1108      Uiso 1.00 calc ...
 H(7)   H  0.6245      0.3114      1.1079      0.0967      Uiso 1.00 calc ...
 H(8)   H  0.4118      0.3643      1.0837      0.0806      Uiso 1.00 calc ...
 H(9)   H  0.2642      0.2637      1.0442      0.0809      Uiso 1.00 calc ...
 H(10)  H  0.3923      0.1469      1.0472      0.0984      Uiso 1.00 calc ...
 H(11)  H  0.2597      0.1086      0.8753      0.0794      Uiso 1.00 calc ...
 H(12)  H  0.2114      0.1189      0.7994      0.0794      Uiso 1.00 calc ...
 H(13)  H  0.2503      0.0417      0.8263      0.0794      Uiso 1.00 calc ...
 H(14)  H  0.4775      0.0491      0.9410      0.0820      Uiso 1.00 calc ...
 H(15)  H  0.4693      -0.0179     0.8920      0.0820      Uiso 1.00 calc ...
 H(16)  H  0.6025      0.0129      0.9166      0.0820      Uiso 1.00 calc ...
 H(17)  H  0.7629      0.0189      0.8164      0.0912      Uiso 1.00 calc ...
 H(18)  H  0.8154      0.0920      0.7882      0.0912      Uiso 1.00 calc ...
 H(19)  H  0.7875      0.0849      0.8655      0.0912      Uiso 1.00 calc ...
 H(20)  H  0.7443      0.1550      0.6967      0.0867      Uiso 1.00 calc ...
 H(21)  H  0.6246      0.1447      0.6471      0.0867      Uiso 1.00 calc ...
 H(22)  H  0.6461      0.2183      0.6857      0.0867      Uiso 1.00 calc ...
 H(23)  H  0.3826      0.2293      0.6897      0.0813      Uiso 1.00 calc ...
 H(24)  H  0.3609      0.1532      0.6556      0.0813      Uiso 1.00 calc ...
 H(25)  H  0.2703      0.1799      0.7117      0.0813      Uiso 1.00 calc ...
 H(26)  H  1.0016      0.3638      1.0221      0.0920      Uiso 1.00 calc ...
 H(27)  H  0.8811      0.4138      1.0156      0.0920      Uiso 1.00 calc ...
 H(28)  H  0.8664      0.3319      1.0349      0.0920      Uiso 1.00 calc ...
 H(29)  H  0.9342      0.1985      0.9748      0.0865      Uiso 1.00 calc ...
 H(30)  H  1.0083      0.1778      0.9101      0.0865      Uiso 1.00 calc ...
 H(31)  H  1.0701      0.2307      0.9646      0.0865      Uiso 1.00 calc ...
 H(32)  H  0.9915      0.1888      0.8013      0.0821      Uiso 1.00 calc ...
 H(33)  H  0.8977      0.2222      0.7456      0.0821      Uiso 1.00 calc ...
 H(34)  H  1.0354      0.2540      0.7569      0.0821      Uiso 1.00 calc ...
 H(35)  H  0.9300      0.3886      0.7241      0.0820      Uiso 1.00 calc ...
 H(36)  H  0.7894      0.3599      0.7202      0.0820      Uiso 1.00 calc ...
 H(37)  H  0.8193      0.4376      0.7490      0.0820      Uiso 1.00 calc ...
 H(38)  H  0.9017      0.5020      0.8663      0.0762      Uiso 1.00 calc ...
 H(39)  H  0.7545      0.4879      0.8614      0.0762      Uiso 1.00 calc ...
 H(40)  H  0.8275      0.4893      0.9326      0.0762      Uiso 1.00 calc ...
 H(41)  H  0.4425      0.4176      0.6525      0.1632      Uiso 1.00 calc ...
 H(42)  H  0.4933      0.4875      0.6174      0.1632      Uiso 1.00 calc ...

loop_
_atom_site_aniso_label
_atom_site_aniso_U_11
_atom_site_aniso_U_22
_atom_site_aniso_U_33
_atom_site_aniso_U_12
_atom_site_aniso_U_13
_atom_site_aniso_U_23
 Ru(1)  0.0275(4)   0.0252(5)   0.0260(4)   -0.0028(4)  0.0058(3)   -0.0036(4) 
 Ru(2)  0.0201(4)   0.0290(5)   0.0242(4)   -0.0014(4)  0.0046(3)   -0.0003(4) 
 Ti(1)  0.0223(8)   0.028(1)    0.044(1)    0.0005(8)   0.0061(7)   -0.0018(8) 
 Ti(2)  0.0300(9)   0.040(1)    0.0246(9)   -0.0034(8)  0.0098(7)   -0.0010(8) 
 Cl(1)  0.043(2)    0.062(2)    0.053(2)    -0.001(1)   -0.010(1)   -0.001(1)  
 Cl(2)  0.045(2)    0.036(2)    0.069(2)    -0.006(1)   0.012(1)    0.014(1)   
 Cl(3)  0.096(3)    0.172(5)    0.118(3)    0.027(3)    -0.025(2)   -0.059(3)  
 Cl(4)  0.121(4)    0.281(7)    0.131(4)    0.069(4)    -0.018(3)   -0.089(4)  
 S(1)   0.024(1)    0.033(1)    0.036(1)    -0.005(1)   0.006(1)    -0.006(1)  
 S(2)   0.024(1)    0.033(1)    0.034(1)    -0.003(1)   0.0071(10)  -0.010(1)  
 S(3)   0.026(1)    0.031(1)    0.027(1)    -0.001(1)   0.0040(9)   0.000(1)   
 S(4)   0.031(1)    0.034(1)    0.033(1)    0.001(1)    0.0083(10)  0.007(1)   
 C(1)   0.071(9)    0.07(1)     0.075(10)   0.050(8)    0.023(8)    0.029(8)   
 C(2)   0.020(6)    0.08(1)     0.11(1)     0.006(6)    0.015(7)    -0.026(9)  
 C(3)   0.045(8)    0.061(9)    0.11(1)     0.022(7)    0.045(8)    0.003(9)   
 C(4)   0.057(9)    0.08(1)     0.09(1)     0.017(8)    0.039(8)    -0.013(9)  
 C(5)   0.053(8)    0.045(9)    0.14(1)     -0.012(7)   0.052(9)    -0.042(9)  
 C(6)   0.10(1)     0.14(2)     0.041(8)    0.06(1)     0.040(8)    0.06(1)    
 C(7)   0.055(9)    0.16(2)     0.029(6)    -0.03(1)    0.007(6)    0.013(9)   
 C(8)   0.11(1)     0.063(10)   0.030(6)    -0.016(9)   0.040(7)    -0.015(6)  
 C(9)   0.040(7)    0.12(1)     0.041(7)    -0.005(8)   0.021(5)    0.016(8)   
 C(10)  0.13(1)     0.063(10)   0.055(8)    -0.03(1)    0.055(9)    0.005(8)   
 C(11)  0.039(6)    0.023(6)    0.047(6)    -0.008(5)   0.006(5)    -0.007(5)  
 C(12)  0.064(7)    0.028(6)    0.034(6)    -0.002(5)   0.009(5)    -0.003(5)  
 C(13)  0.038(6)    0.029(6)    0.054(7)    -0.002(5)   0.009(5)    -0.017(5)  
 C(14)  0.052(6)    0.030(6)    0.038(6)    -0.012(5)   0.017(5)    -0.011(5)  
 C(15)  0.060(7)    0.033(6)    0.031(6)    0.001(5)    0.003(5)    -0.002(5)  
 C(16)  0.055(7)    0.060(8)    0.085(9)    -0.035(6)   0.020(6)    -0.021(7)  
 C(17)  0.092(10)   0.033(7)    0.079(9)    -0.003(6)   0.000(7)    0.015(6)   
 C(18)  0.067(8)    0.053(8)    0.11(1)     0.018(7)    -0.004(7)   -0.028(8)  
 C(19)  0.096(9)    0.065(9)    0.059(8)    -0.031(7)   0.039(7)    -0.036(6)  
 C(20)  0.093(9)    0.055(9)    0.052(7)    -0.015(7)   -0.019(6)   -0.013(6)  
 C(21)  0.023(5)    0.060(8)    0.029(5)    -0.001(5)   0.006(4)    -0.003(5)  
 C(22)  0.016(4)    0.043(7)    0.042(6)    0.000(4)    0.005(4)    0.012(5)   
 C(23)  0.014(4)    0.052(8)    0.041(6)    -0.005(4)   0.009(4)    -0.006(5)  
 C(24)  0.013(4)    0.045(6)    0.037(6)    -0.005(4)   0.001(4)    0.006(5)   
 C(25)  0.022(5)    0.043(7)    0.050(6)    -0.009(5)   0.007(4)    -0.006(5)  
 C(26)  0.044(7)    0.14(1)     0.046(7)    -0.022(8)   0.005(5)    -0.021(8)  
 C(27)  0.031(6)    0.08(1)     0.105(10)   0.002(6)    0.005(6)    0.041(8)   
 C(28)  0.047(7)    0.073(9)    0.088(9)    -0.013(6)   0.035(6)    -0.040(7)  
 C(29)  0.052(7)    0.10(1)     0.057(7)    -0.013(7)   0.000(6)    0.034(7)   
 C(30)  0.036(6)    0.049(8)    0.11(1)     -0.014(6)   0.017(6)    -0.015(7)  
 C(31)  0.061(9)    0.24(2)     0.11(1)     -0.03(1)    0.011(8)    -0.10(1)   
#------------------------------------------------------------------------------
_refine_special_details
;
Refinement based on F against all reflections. The weighted R-factor (wR) and
goodness of fit (S) are based on F, conventional R-factors (R) are calculated
on F, with F set to zero for negative F. The threshold expression of
F^2^ > 2sigma(F^2^) is used only for calculating R-factors(gt) etc. thus the
refinement was done using all reflections.  
;

_refine_ls_structure_factor_coef       F
_refine_ls_matrix_type                 full
_refine_ls_weighting_scheme            calc
_refine_ls_weighting_details
   'w = 1/[\s^2^(Fo) + 0.00000|Fo|^2^]'
_refine_ls_hydrogen_treatment          noref
_refine_ls_extinction_method           none
_refine_ls_extinction_coef             ?
_refine_ls_abs_structure_details       ?
_refine_ls_abs_structure_Flack         ?
_refine_ls_number_reflns               4281
_refine_ls_number_parameters           389
_refine_ls_number_restraints           0
_refine_ls_number_constraints          0
_refine_ls_R_factor_all                0.0478
_refine_ls_R_factor_gt                 0.0478
_refine_ls_wR_factor_all               ?
_refine_ls_wR_factor_ref               0.0320
_refine_ls_wR_factor_gt                0.0320
_refine_ls_goodness_of_fit_all         ?
_refine_ls_goodness_of_fit_ref         1.632
_refine_ls_shift/su_max                4.9080
_refine_ls_shift/su_mean               0.0140
_refine_diff_density_min               -0.99
_refine_diff_density_max               1.00
#------------------------------------------------------------------------------
_geom_special_details
;
 ?
;
loop_
_geom_bond_atom_site_label_1
_geom_bond_atom_site_label_2
_geom_bond_distance
_geom_bond_site_symmetry_1
_geom_bond_site_symmetry_2
_geom_bond_publ_flag
 Ru(1)     Ru(2)     2.809(1)   1_555 1_555 yes
 Ru(1)     Ti(2)     2.904(2)   1_555 1_555 yes
 Ru(1)     S(1)      2.382(2)   1_555 1_555 yes
 Ru(1)     S(3)      2.315(3)   1_555 1_555 yes
 Ru(1)     S(4)      2.311(2)   1_555 1_555 yes
 Ru(1)     C(11)     2.224(9)   1_555 1_555 yes
 Ru(1)     C(12)     2.251(9)   1_555 1_555 yes
 Ru(1)     C(13)     2.227(9)   1_555 1_555 yes
 Ru(1)     C(14)     2.230(9)   1_555 1_555 yes
 Ru(1)     C(15)     2.185(9)   1_555 1_555 yes
 Ru(2)     Ti(2)     2.963(2)   1_555 1_555 yes
 Ru(2)     S(2)      2.382(2)   1_555 1_555 yes
 Ru(2)     S(3)      2.316(2)   1_555 1_555 yes
 Ru(2)     S(4)      2.313(3)   1_555 1_555 yes
 Ru(2)     C(21)     2.176(9)   1_555 1_555 yes
 Ru(2)     C(22)     2.264(8)   1_555 1_555 yes
 Ru(2)     C(23)     2.315(7)   1_555 1_555 yes
 Ru(2)     C(24)     2.265(8)   1_555 1_555 yes
 Ru(2)     C(25)     2.207(9)   1_555 1_555 yes
 Ti(1)     Cl(1)     2.407(3)   1_555 1_555 yes
 Ti(1)     Cl(2)     2.413(3)   1_555 1_555 yes
 Ti(1)     S(1)      2.539(3)   1_555 1_555 yes
 Ti(1)     S(2)      2.534(3)   1_555 1_555 yes
 Ti(1)     S(3)      2.570(3)   1_555 1_555 yes
 Ti(1)     C(1)      2.38(1)    1_555 1_555 yes
 Ti(1)     C(2)      2.388(10)  1_555 1_555 yes
 Ti(1)     C(3)      2.37(1)    1_555 1_555 yes
 Ti(1)     C(4)      2.41(1)    1_555 1_555 yes
 Ti(1)     C(5)      2.40(1)    1_555 1_555 yes
 Ti(2)     S(1)      2.299(3)   1_555 1_555 yes
 Ti(2)     S(2)      2.297(3)   1_555 1_555 yes
 Ti(2)     S(4)      2.277(3)   1_555 1_555 yes
 Ti(2)     C(6)      2.38(1)    1_555 1_555 yes
 Ti(2)     C(7)      2.34(1)    1_555 1_555 yes
 Ti(2)     C(8)      2.359(9)   1_555 1_555 yes
 Ti(2)     C(9)      2.361(9)   1_555 1_555 yes
 Ti(2)     C(10)     2.37(1)    1_555 1_555 yes
 Cl(3)     C(31)     1.73(1)    1_555 1_555 yes
 Cl(4)     C(31)     1.62(1)    1_555 1_555 yes
 C(1)      C(2)      1.38(2)    1_555 1_555 yes
 C(1)      C(5)      1.39(2)    1_555 1_555 yes
 C(2)      C(3)      1.33(2)    1_555 1_555 yes
 C(3)      C(4)      1.28(2)    1_555 1_555 yes
 C(4)      C(5)      1.34(2)    1_555 1_555 yes
 C(6)      C(7)      1.36(2)    1_555 1_555 yes
 C(6)      C(10)     1.37(2)    1_555 1_555 yes
 C(7)      C(8)      1.34(2)    1_555 1_555 yes
 C(8)      C(9)      1.37(1)    1_555 1_555 yes
 C(9)      C(10)     1.39(2)    1_555 1_555 yes
 C(11)     C(12)     1.38(1)    1_555 1_555 yes
 C(11)     C(15)     1.39(1)    1_555 1_555 yes
 C(11)     C(16)     1.52(1)    1_555 1_555 yes
 C(12)     C(13)     1.44(1)    1_555 1_555 yes
 C(12)     C(17)     1.50(1)    1_555 1_555 yes
 C(13)     C(14)     1.42(1)    1_555 1_555 yes
 C(13)     C(18)     1.49(1)    1_555 1_555 yes
 C(14)     C(15)     1.43(1)    1_555 1_555 yes
 C(14)     C(19)     1.51(1)    1_555 1_555 yes
 C(15)     C(20)     1.51(1)    1_555 1_555 yes
 C(21)     C(22)     1.40(1)    1_555 1_555 yes
 C(21)     C(25)     1.41(1)    1_555 1_555 yes
 C(21)     C(26)     1.52(1)    1_555 1_555 yes
 C(22)     C(23)     1.43(1)    1_555 1_555 yes
 C(22)     C(27)     1.49(1)    1_555 1_555 yes
 C(23)     C(24)     1.42(1)    1_555 1_555 yes
 C(23)     C(28)     1.51(1)    1_555 1_555 yes
 C(24)     C(25)     1.43(1)    1_555 1_555 yes
 C(24)     C(29)     1.50(1)    1_555 1_555 yes
 C(25)     C(30)     1.49(1)    1_555 1_555 yes
#------------------------------------------------------------------------------
loop_
_geom_angle_atom_site_label_1
_geom_angle_atom_site_label_2
_geom_angle_atom_site_label_3
_geom_angle
_geom_angle_site_symmetry_1
_geom_angle_site_symmetry_2
_geom_angle_site_symmetry_3
_geom_angle_publ_flag
   Ru(2)     Ru(1)     Ti(2)     62.44(4)   1_555 1_555 1_555 yes
   Ru(2)     Ru(1)     S(1)      96.82(6)   1_555 1_555 1_555 yes
   Ru(2)     Ru(1)     S(3)      52.66(6)   1_555 1_555 1_555 yes
   Ru(2)     Ru(1)     S(4)      52.61(7)   1_555 1_555 1_555 yes
   Ru(2)     Ru(1)     C(11)     172.4(2)   1_555 1_555 1_555 yes
   Ru(2)     Ru(1)     C(12)     137.5(3)   1_555 1_555 1_555 yes
   Ru(2)     Ru(1)     C(13)     110.8(2)   1_555 1_555 1_555 yes
   Ru(2)     Ru(1)     C(14)     112.9(2)   1_555 1_555 1_555 yes
   Ru(2)     Ru(1)     C(15)     141.9(3)   1_555 1_555 1_555 yes
   Ti(2)     Ru(1)     S(1)      50.38(7)   1_555 1_555 1_555 yes
   Ti(2)     Ru(1)     S(3)      87.74(7)   1_555 1_555 1_555 yes
   Ti(2)     Ru(1)     S(4)      50.21(7)   1_555 1_555 1_555 yes
   Ti(2)     Ru(1)     C(11)     122.1(2)   1_555 1_555 1_555 yes
   Ti(2)     Ru(1)     C(12)     116.0(2)   1_555 1_555 1_555 yes
   Ti(2)     Ru(1)     C(13)     136.0(3)   1_555 1_555 1_555 yes
   Ti(2)     Ru(1)     C(14)     171.5(3)   1_555 1_555 1_555 yes
   Ti(2)     Ru(1)     C(15)     149.8(3)   1_555 1_555 1_555 yes
   S(1)      Ru(1)     S(3)      80.02(8)   1_555 1_555 1_555 yes
   S(1)      Ru(1)     S(4)      100.04(8)  1_555 1_555 1_555 yes
   S(1)      Ru(1)     C(11)     90.6(2)    1_555 1_555 1_555 yes
   S(1)      Ru(1)     C(12)     114.0(3)   1_555 1_555 1_555 yes
   S(1)      Ru(1)     C(13)     150.8(2)   1_555 1_555 1_555 yes
   S(1)      Ru(1)     C(14)     138.0(3)   1_555 1_555 1_555 yes
   S(1)      Ru(1)     C(15)     101.3(3)   1_555 1_555 1_555 yes
   S(3)      Ru(1)     S(4)      104.63(9)  1_555 1_555 1_555 yes
   S(3)      Ru(1)     C(11)     131.1(3)   1_555 1_555 1_555 yes
   S(3)      Ru(1)     C(12)     156.3(2)   1_555 1_555 1_555 yes
   S(3)      Ru(1)     C(13)     124.3(3)   1_555 1_555 1_555 yes
   S(3)      Ru(1)     C(14)     94.6(3)    1_555 1_555 1_555 yes
   S(3)      Ru(1)     C(15)     97.9(3)    1_555 1_555 1_555 yes
   S(4)      Ru(1)     C(11)     124.3(3)   1_555 1_555 1_555 yes
   S(4)      Ru(1)     C(12)     92.1(3)    1_555 1_555 1_555 yes
   S(4)      Ru(1)     C(13)     89.7(3)    1_555 1_555 1_555 yes
   S(4)      Ru(1)     C(14)     121.4(3)   1_555 1_555 1_555 yes
   S(4)      Ru(1)     C(15)     151.2(3)   1_555 1_555 1_555 yes
   C(11)     Ru(1)     C(12)     36.0(3)    1_555 1_555 1_555 yes
   C(11)     Ru(1)     C(13)     61.6(3)    1_555 1_555 1_555 yes
   C(11)     Ru(1)     C(14)     61.8(3)    1_555 1_555 1_555 yes
   C(11)     Ru(1)     C(15)     36.8(3)    1_555 1_555 1_555 yes
   C(12)     Ru(1)     C(13)     37.6(3)    1_555 1_555 1_555 yes
   C(12)     Ru(1)     C(14)     62.0(3)    1_555 1_555 1_555 yes
   C(12)     Ru(1)     C(15)     61.6(3)    1_555 1_555 1_555 yes
   C(13)     Ru(1)     C(14)     37.2(3)    1_555 1_555 1_555 yes
   C(13)     Ru(1)     C(15)     62.6(4)    1_555 1_555 1_555 yes
   C(14)     Ru(1)     C(15)     37.8(3)    1_555 1_555 1_555 yes
   Ru(1)     Ru(2)     Ti(2)     60.34(4)   1_555 1_555 1_555 yes
   Ru(1)     Ru(2)     S(2)      95.73(6)   1_555 1_555 1_555 yes
   Ru(1)     Ru(2)     S(3)      52.64(6)   1_555 1_555 1_555 yes
   Ru(1)     Ru(2)     S(4)      52.56(6)   1_555 1_555 1_555 yes
   Ru(1)     Ru(2)     C(21)     157.6(3)   1_555 1_555 1_555 yes
   Ru(1)     Ru(2)     C(22)     125.4(2)   1_555 1_555 1_555 yes
   Ru(1)     Ru(2)     C(23)     113.6(2)   1_555 1_555 1_555 yes
   Ru(1)     Ru(2)     C(24)     128.7(2)   1_555 1_555 1_555 yes
   Ru(1)     Ru(2)     C(25)     162.5(3)   1_555 1_555 1_555 yes
   Ti(2)     Ru(2)     S(2)      49.45(7)   1_555 1_555 1_555 yes
   Ti(2)     Ru(2)     S(3)      86.33(6)   1_555 1_555 1_555 yes
   Ti(2)     Ru(2)     S(4)      49.27(7)   1_555 1_555 1_555 yes
   Ti(2)     Ru(2)     C(21)     115.1(2)   1_555 1_555 1_555 yes
   Ti(2)     Ru(2)     C(22)     126.0(2)   1_555 1_555 1_555 yes
   Ti(2)     Ru(2)     C(23)     156.8(2)   1_555 1_555 1_555 yes
   Ti(2)     Ru(2)     C(24)     165.7(2)   1_555 1_555 1_555 yes
   Ti(2)     Ru(2)     C(25)     131.1(2)   1_555 1_555 1_555 yes
   S(2)      Ru(2)     S(3)      80.95(8)   1_555 1_555 1_555 yes
   S(2)      Ru(2)     S(4)      97.73(8)   1_555 1_555 1_555 yes
   S(2)      Ru(2)     C(21)     95.7(2)    1_555 1_555 1_555 yes
   S(2)      Ru(2)     C(22)     130.7(3)   1_555 1_555 1_555 yes
   S(2)      Ru(2)     C(23)     148.8(2)   1_555 1_555 1_555 yes
   S(2)      Ru(2)     C(24)     116.3(3)   1_555 1_555 1_555 yes
   S(2)      Ru(2)     C(25)     87.3(2)    1_555 1_555 1_555 yes
   S(3)      Ru(2)     S(4)      104.56(9)  1_555 1_555 1_555 yes
   S(3)      Ru(2)     C(21)     148.7(3)   1_555 1_555 1_555 yes
   S(3)      Ru(2)     C(22)     144.0(2)   1_555 1_555 1_555 yes
   S(3)      Ru(2)     C(23)     108.0(2)   1_555 1_555 1_555 yes
   S(3)      Ru(2)     C(24)     92.1(2)    1_555 1_555 1_555 yes
   S(3)      Ru(2)     C(25)     111.3(3)   1_555 1_555 1_555 yes
   S(4)      Ru(2)     C(21)     106.8(3)   1_555 1_555 1_555 yes
   S(4)      Ru(2)     C(22)     89.3(2)    1_555 1_555 1_555 yes
   S(4)      Ru(2)     C(23)     108.2(3)   1_555 1_555 1_555 yes
   S(4)      Ru(2)     C(24)     144.2(2)   1_555 1_555 1_555 yes
   S(4)      Ru(2)     C(25)     144.1(3)   1_555 1_555 1_555 yes
   C(21)     Ru(2)     C(22)     36.7(3)    1_555 1_555 1_555 yes
   C(21)     Ru(2)     C(23)     60.9(3)    1_555 1_555 1_555 yes
   C(21)     Ru(2)     C(24)     61.3(3)    1_555 1_555 1_555 yes
   C(21)     Ru(2)     C(25)     37.4(3)    1_555 1_555 1_555 yes
   C(22)     Ru(2)     C(23)     36.2(3)    1_555 1_555 1_555 yes
   C(22)     Ru(2)     C(24)     60.6(3)    1_555 1_555 1_555 yes
   C(22)     Ru(2)     C(25)     61.9(3)    1_555 1_555 1_555 yes
   C(23)     Ru(2)     C(24)     36.0(3)    1_555 1_555 1_555 yes
   C(23)     Ru(2)     C(25)     61.5(3)    1_555 1_555 1_555 yes
   C(24)     Ru(2)     C(25)     37.2(3)    1_555 1_555 1_555 yes
   Cl(1)     Ti(1)     Cl(2)     91.2(1)    1_555 1_555 1_555 yes
   Cl(1)     Ti(1)     S(1)      86.5(1)    1_555 1_555 1_555 yes
   Cl(1)     Ti(1)     S(2)      152.3(1)   1_555 1_555 1_555 yes
   Cl(1)     Ti(1)     S(3)      79.16(9)   1_555 1_555 1_555 yes
   Cl(1)     Ti(1)     C(1)      82.8(4)    1_555 1_555 1_555 yes
   Cl(1)     Ti(1)     C(2)      78.3(3)    1_555 1_555 1_555 yes
   Cl(1)     Ti(1)     C(3)      107.5(4)   1_555 1_555 1_555 yes
   Cl(1)     Ti(1)     C(4)      131.9(3)   1_555 1_555 1_555 yes
   Cl(1)     Ti(1)     C(5)      115.5(5)   1_555 1_555 1_555 yes
   Cl(2)     Ti(1)     S(1)      150.9(1)   1_555 1_555 1_555 yes
   Cl(2)     Ti(1)     S(2)      86.78(10)  1_555 1_555 1_555 yes
   Cl(2)     Ti(1)     S(3)      78.60(9)   1_555 1_555 1_555 yes
   Cl(2)     Ti(1)     C(1)      85.7(4)    1_555 1_555 1_555 yes
   Cl(2)     Ti(1)     C(2)      118.9(4)   1_555 1_555 1_555 yes
   Cl(2)     Ti(1)     C(3)      130.4(3)   1_555 1_555 1_555 yes
   Cl(2)     Ti(1)     C(4)      104.4(4)   1_555 1_555 1_555 yes
   Cl(2)     Ti(1)     C(5)      77.6(3)    1_555 1_555 1_555 yes
   S(1)      Ti(1)     S(2)      82.10(9)   1_555 1_555 1_555 yes
   S(1)      Ti(1)     S(3)      72.47(8)   1_555 1_555 1_555 yes
   S(1)      Ti(1)     C(1)      122.6(4)   1_555 1_555 1_555 yes
   S(1)      Ti(1)     C(2)      89.1(4)    1_555 1_555 1_555 yes
   S(1)      Ti(1)     C(3)      77.5(3)    1_555 1_555 1_555 yes
   S(1)      Ti(1)     C(4)      98.5(4)    1_555 1_555 1_555 yes
   S(1)      Ti(1)     C(5)      129.2(4)   1_555 1_555 1_555 yes
   S(2)      Ti(1)     S(3)      73.37(8)   1_555 1_555 1_555 yes
   S(2)      Ti(1)     C(1)      124.5(4)   1_555 1_555 1_555 yes
   S(2)      Ti(1)     C(2)      126.4(4)   1_555 1_555 1_555 yes
   S(2)      Ti(1)     C(3)      94.5(4)    1_555 1_555 1_555 yes
   S(2)      Ti(1)     C(4)      75.0(3)    1_555 1_555 1_555 yes
   S(2)      Ti(1)     C(5)      91.1(4)    1_555 1_555 1_555 yes
   S(3)      Ti(1)     C(1)      155.7(3)   1_555 1_555 1_555 yes
   S(3)      Ti(1)     C(2)      151.6(3)   1_555 1_555 1_555 yes
   S(3)      Ti(1)     C(3)      148.8(3)   1_555 1_555 1_555 yes
   S(3)      Ti(1)     C(4)      148.0(3)   1_555 1_555 1_555 yes
   S(3)      Ti(1)     C(5)      152.2(3)   1_555 1_555 1_555 yes
   C(1)      Ti(1)     C(2)      33.6(4)    1_555 1_555 1_555 yes
   C(1)      Ti(1)     C(3)      53.3(4)    1_555 1_555 1_555 yes
   C(1)      Ti(1)     C(4)      54.2(4)    1_555 1_555 1_555 yes
   C(1)      Ti(1)     C(5)      33.7(4)    1_555 1_555 1_555 yes
   C(2)      Ti(1)     C(3)      32.4(4)    1_555 1_555 1_555 yes
   C(2)      Ti(1)     C(4)      54.2(4)    1_555 1_555 1_555 yes
   C(2)      Ti(1)     C(5)      55.6(4)    1_555 1_555 1_555 yes
   C(3)      Ti(1)     C(4)      31.1(4)    1_555 1_555 1_555 yes
   C(3)      Ti(1)     C(5)      52.8(4)    1_555 1_555 1_555 yes
   C(4)      Ti(1)     C(5)      32.3(4)    1_555 1_555 1_555 yes
   Ru(1)     Ti(2)     Ru(2)     57.22(3)   1_555 1_555 1_555 yes
   Ru(1)     Ti(2)     S(1)      52.94(7)   1_555 1_555 1_555 yes
   Ru(1)     Ti(2)     S(2)      95.13(7)   1_555 1_555 1_555 yes
   Ru(1)     Ti(2)     S(4)      51.26(7)   1_555 1_555 1_555 yes
   Ru(1)     Ti(2)     C(6)      124.2(5)   1_555 1_555 1_555 yes
   Ru(1)     Ti(2)     C(7)      154.7(5)   1_555 1_555 1_555 yes
   Ru(1)     Ti(2)     C(8)      164.3(4)   1_555 1_555 1_555 yes
   Ru(1)     Ti(2)     C(9)      131.0(4)   1_555 1_555 1_555 yes
   Ru(1)     Ti(2)     C(10)     113.8(3)   1_555 1_555 1_555 yes
   Ru(2)     Ti(2)     S(1)      94.60(8)   1_555 1_555 1_555 yes
   Ru(2)     Ti(2)     S(2)      51.99(6)   1_555 1_555 1_555 yes
   Ru(2)     Ti(2)     S(4)      50.33(7)   1_555 1_555 1_555 yes
   Ru(2)     Ti(2)     C(6)      122.5(4)   1_555 1_555 1_555 yes
   Ru(2)     Ti(2)     C(7)      118.1(3)   1_555 1_555 1_555 yes
   Ru(2)     Ti(2)     C(8)      137.9(4)   1_555 1_555 1_555 yes
   Ru(2)     Ti(2)     C(9)      171.7(4)   1_555 1_555 1_555 yes
   Ru(2)     Ti(2)     C(10)     149.1(5)   1_555 1_555 1_555 yes
   S(1)      Ti(2)     S(2)      92.9(1)    1_555 1_555 1_555 yes
   S(1)      Ti(2)     S(4)      103.6(1)   1_555 1_555 1_555 yes
   S(1)      Ti(2)     C(6)      134.4(5)   1_555 1_555 1_555 yes
   S(1)      Ti(2)     C(7)      145.7(3)   1_555 1_555 1_555 yes
   S(1)      Ti(2)     C(8)      114.4(4)   1_555 1_555 1_555 yes
   S(1)      Ti(2)     C(9)      90.9(3)    1_555 1_555 1_555 yes
   S(1)      Ti(2)     C(10)     101.4(4)   1_555 1_555 1_555 yes
   S(2)      Ti(2)     S(4)      101.26(10) 1_555 1_555 1_555 yes
   S(2)      Ti(2)     C(6)      129.9(6)   1_555 1_555 1_555 yes
   S(2)      Ti(2)     C(7)      99.2(4)    1_555 1_555 1_555 yes
   S(2)      Ti(2)     C(8)      94.8(3)    1_555 1_555 1_555 yes
   S(2)      Ti(2)     C(9)      121.6(4)   1_555 1_555 1_555 yes
   S(2)      Ti(2)     C(10)     150.8(3)   1_555 1_555 1_555 yes
   S(4)      Ti(2)     C(6)      84.8(3)    1_555 1_555 1_555 yes
   S(4)      Ti(2)     C(7)      105.2(5)   1_555 1_555 1_555 yes
   S(4)      Ti(2)     C(8)      137.7(4)   1_555 1_555 1_555 yes
   S(4)      Ti(2)     C(9)      134.0(4)   1_555 1_555 1_555 yes
   S(4)      Ti(2)     C(10)     99.9(4)    1_555 1_555 1_555 yes
   C(6)      Ti(2)     C(7)      33.4(5)    1_555 1_555 1_555 yes
   C(6)      Ti(2)     C(8)      55.6(4)    1_555 1_555 1_555 yes
   C(6)      Ti(2)     C(9)      55.9(4)    1_555 1_555 1_555 yes
   C(6)      Ti(2)     C(10)     33.5(4)    1_555 1_555 1_555 yes
   C(7)      Ti(2)     C(8)      33.1(4)    1_555 1_555 1_555 yes
   C(7)      Ti(2)     C(9)      55.4(4)    1_555 1_555 1_555 yes
   C(7)      Ti(2)     C(10)     55.6(5)    1_555 1_555 1_555 yes
   C(8)      Ti(2)     C(9)      33.8(4)    1_555 1_555 1_555 yes
   C(8)      Ti(2)     C(10)     56.2(4)    1_555 1_555 1_555 yes
   C(9)      Ti(2)     C(10)     34.2(4)    1_555 1_555 1_555 yes
   Ru(1)     S(1)      Ti(1)     102.93(9)  1_555 1_555 1_555 yes
   Ru(1)     S(1)      Ti(2)     76.68(8)   1_555 1_555 1_555 yes
   Ti(1)     S(1)      Ti(2)     91.81(10)  1_555 1_555 1_555 yes
   Ru(2)     S(2)      Ti(1)     102.36(9)  1_555 1_555 1_555 yes
   Ru(2)     S(2)      Ti(2)     78.56(8)   1_555 1_555 1_555 yes
   Ti(1)     S(2)      Ti(2)     91.98(9)   1_555 1_555 1_555 yes
   Ru(1)     S(3)      Ru(2)     74.70(7)   1_555 1_555 1_555 yes
   Ru(1)     S(3)      Ti(1)     103.89(8)  1_555 1_555 1_555 yes
   Ru(2)     S(3)      Ti(1)     103.14(9)  1_555 1_555 1_555 yes
   Ru(1)     S(4)      Ru(2)     74.83(8)   1_555 1_555 1_555 yes
   Ru(1)     S(4)      Ti(2)     78.53(9)   1_555 1_555 1_555 yes
   Ru(2)     S(4)      Ti(2)     80.40(10)  1_555 1_555 1_555 yes
   Ti(1)     C(1)      C(2)      73.5(6)    1_555 1_555 1_555 yes
   Ti(1)     C(1)      C(5)      73.9(7)    1_555 1_555 1_555 yes
   Ti(1)     C(1)      H(1)      118.5(8)   1_555 1_555 1_555 no
   C(2)      C(1)      C(5)      107(1)     1_555 1_555 1_555 yes
   C(2)      C(1)      H(1)      126(1)     1_555 1_555 1_555 no
   C(5)      C(1)      H(1)      126(1)     1_555 1_555 1_555 no
   Ti(1)     C(2)      C(1)      72.9(6)    1_555 1_555 1_555 yes
   Ti(1)     C(2)      C(3)      73.2(6)    1_555 1_555 1_555 yes
   Ti(1)     C(2)      H(2)      118.2(8)   1_555 1_555 1_555 no
   C(1)      C(2)      C(3)      104(1)     1_555 1_555 1_555 yes
   C(1)      C(2)      H(2)      127(1)     1_555 1_555 1_555 no
   C(3)      C(2)      H(2)      128(1)     1_555 1_555 1_555 no
   Ti(1)     C(3)      C(2)      74.4(7)    1_555 1_555 1_555 yes
   Ti(1)     C(3)      C(4)      75.9(7)    1_555 1_555 1_555 yes
   Ti(1)     C(3)      H(3)      117.9(8)   1_555 1_555 1_555 no
   C(2)      C(3)      C(4)      113(1)     1_555 1_555 1_555 yes
   C(2)      C(3)      H(3)      123(1)     1_555 1_555 1_555 no
   C(4)      C(3)      H(3)      123(1)     1_555 1_555 1_555 no
   Ti(1)     C(4)      C(3)      73.0(8)    1_555 1_555 1_555 yes
   Ti(1)     C(4)      C(5)      73.5(7)    1_555 1_555 1_555 yes
   Ti(1)     C(4)      H(4)      119.4(8)   1_555 1_555 1_555 no
   C(3)      C(4)      C(5)      108(1)     1_555 1_555 1_555 yes
   C(3)      C(4)      H(4)      125(1)     1_555 1_555 1_555 no
   C(5)      C(4)      H(4)      125(1)     1_555 1_555 1_555 no
   Ti(1)     C(5)      C(1)      72.4(7)    1_555 1_555 1_555 yes
   Ti(1)     C(5)      C(4)      74.2(8)    1_555 1_555 1_555 yes
   Ti(1)     C(5)      H(5)      118.8(8)   1_555 1_555 1_555 no
   C(1)      C(5)      C(4)      106(1)     1_555 1_555 1_555 yes
   C(1)      C(5)      H(5)      126(2)     1_555 1_555 1_555 no
   C(4)      C(5)      H(5)      126(2)     1_555 1_555 1_555 no
   Ti(2)     C(6)      C(7)      71.8(8)    1_555 1_555 1_555 yes
   Ti(2)     C(6)      C(10)     72.9(7)    1_555 1_555 1_555 yes
   Ti(2)     C(6)      H(6)      120.8(8)   1_555 1_555 1_555 no
   C(7)      C(6)      C(10)     107(1)     1_555 1_555 1_555 yes
   C(7)      C(6)      H(6)      126(2)     1_555 1_555 1_555 no
   C(10)     C(6)      H(6)      126(2)     1_555 1_555 1_555 no
   Ti(2)     C(7)      C(6)      74.8(8)    1_555 1_555 1_555 yes
   Ti(2)     C(7)      C(8)      74.3(7)    1_555 1_555 1_555 yes
   Ti(2)     C(7)      H(7)      117.8(8)   1_555 1_555 1_555 no
   C(6)      C(7)      C(8)      110(1)     1_555 1_555 1_555 yes
   C(6)      C(7)      H(7)      124(2)     1_555 1_555 1_555 no
   C(8)      C(7)      H(7)      124(2)     1_555 1_555 1_555 no
   Ti(2)     C(8)      C(7)      72.7(7)    1_555 1_555 1_555 yes
   Ti(2)     C(8)      C(9)      73.2(6)    1_555 1_555 1_555 yes
   Ti(2)     C(8)      H(8)      119.8(7)   1_555 1_555 1_555 no
   C(7)      C(8)      C(9)      107(1)     1_555 1_555 1_555 yes
   C(7)      C(8)      H(8)      126(1)     1_555 1_555 1_555 no
   C(9)      C(8)      H(8)      126(1)     1_555 1_555 1_555 no
   Ti(2)     C(9)      C(8)      73.0(6)    1_555 1_555 1_555 yes
   Ti(2)     C(9)      C(10)     73.2(6)    1_555 1_555 1_555 yes
   Ti(2)     C(9)      H(9)      119.4(8)   1_555 1_555 1_555 no
   C(8)      C(9)      C(10)     107(1)     1_555 1_555 1_555 yes
   C(8)      C(9)      H(9)      126(1)     1_555 1_555 1_555 no
   C(10)     C(9)      H(9)      126(1)     1_555 1_555 1_555 no
   Ti(2)     C(10)     C(6)      73.6(7)    1_555 1_555 1_555 yes
   Ti(2)     C(10)     C(9)      72.6(7)    1_555 1_555 1_555 yes
   Ti(2)     C(10)     H(10)     119.3(8)   1_555 1_555 1_555 no
   C(6)      C(10)     C(9)      107(1)     1_555 1_555 1_555 yes
   C(6)      C(10)     H(10)     126(2)     1_555 1_555 1_555 no
   C(9)      C(10)     H(10)     126(2)     1_555 1_555 1_555 no
   Ru(1)     C(11)     C(12)     73.1(5)    1_555 1_555 1_555 yes
   Ru(1)     C(11)     C(15)     70.1(6)    1_555 1_555 1_555 yes
   Ru(1)     C(11)     C(16)     126.6(6)   1_555 1_555 1_555 yes
   C(12)     C(11)     C(15)     109.9(9)   1_555 1_555 1_555 yes
   C(12)     C(11)     C(16)     124.0(9)   1_555 1_555 1_555 yes
   C(15)     C(11)     C(16)     126.0(10)  1_555 1_555 1_555 yes
   Ru(1)     C(12)     C(11)     70.9(5)    1_555 1_555 1_555 yes
   Ru(1)     C(12)     C(13)     70.3(5)    1_555 1_555 1_555 yes
   Ru(1)     C(12)     C(17)     127.9(7)   1_555 1_555 1_555 yes
   C(11)     C(12)     C(13)     107.6(9)   1_555 1_555 1_555 yes
   C(11)     C(12)     C(17)     126.9(9)   1_555 1_555 1_555 yes
   C(13)     C(12)     C(17)     125.4(10)  1_555 1_555 1_555 yes
   Ru(1)     C(13)     C(12)     72.1(5)    1_555 1_555 1_555 yes
   Ru(1)     C(13)     C(14)     71.5(5)    1_555 1_555 1_555 yes
   Ru(1)     C(13)     C(18)     127.9(7)   1_555 1_555 1_555 yes
   C(12)     C(13)     C(14)     107.5(8)   1_555 1_555 1_555 yes
   C(12)     C(13)     C(18)     125(1)     1_555 1_555 1_555 yes
   C(14)     C(13)     C(18)     126.5(9)   1_555 1_555 1_555 yes
   Ru(1)     C(14)     C(13)     71.3(5)    1_555 1_555 1_555 yes
   Ru(1)     C(14)     C(15)     69.4(5)    1_555 1_555 1_555 yes
   Ru(1)     C(14)     C(19)     126.9(6)   1_555 1_555 1_555 yes
   C(13)     C(14)     C(15)     107.0(8)   1_555 1_555 1_555 yes
   C(13)     C(14)     C(19)     128.4(10)  1_555 1_555 1_555 yes
   C(15)     C(14)     C(19)     124.5(10)  1_555 1_555 1_555 yes
   Ru(1)     C(15)     C(11)     73.1(5)    1_555 1_555 1_555 yes
   Ru(1)     C(15)     C(14)     72.8(5)    1_555 1_555 1_555 yes
   Ru(1)     C(15)     C(20)     127.5(7)   1_555 1_555 1_555 yes
   C(11)     C(15)     C(14)     108.1(9)   1_555 1_555 1_555 yes
   C(11)     C(15)     C(20)     126.9(10)  1_555 1_555 1_555 yes
   C(14)     C(15)     C(20)     124.3(9)   1_555 1_555 1_555 yes
   C(11)     C(16)     H(11)     109.5(9)   1_555 1_555 1_555 no
   C(11)     C(16)     H(12)     109.5(9)   1_555 1_555 1_555 no
   C(11)     C(16)     H(13)     109.6(10)  1_555 1_555 1_555 no
   H(11)     C(16)     H(12)     109(1)     1_555 1_555 1_555 no
   H(11)     C(16)     H(13)     109(1)     1_555 1_555 1_555 no
   H(12)     C(16)     H(13)     109.4(10)  1_555 1_555 1_555 no
   C(12)     C(17)     H(14)     109.6(9)   1_555 1_555 1_555 no
   C(12)     C(17)     H(15)     109.6(10)  1_555 1_555 1_555 no
   C(12)     C(17)     H(16)     109.6(10)  1_555 1_555 1_555 no
   H(14)     C(17)     H(15)     109(1)     1_555 1_555 1_555 no
   H(14)     C(17)     H(16)     109(1)     1_555 1_555 1_555 no
   H(15)     C(17)     H(16)     109(1)     1_555 1_555 1_555 no
   C(13)     C(18)     H(17)     109(1)     1_555 1_555 1_555 no
   C(13)     C(18)     H(18)     109(1)     1_555 1_555 1_555 no
   C(13)     C(18)     H(19)     109.6(9)   1_555 1_555 1_555 no
   H(17)     C(18)     H(18)     109(1)     1_555 1_555 1_555 no
   H(17)     C(18)     H(19)     109(1)     1_555 1_555 1_555 no
   H(18)     C(18)     H(19)     109(1)     1_555 1_555 1_555 no
   C(14)     C(19)     H(20)     109(1)     1_555 1_555 1_555 no
   C(14)     C(19)     H(21)     109.4(9)   1_555 1_555 1_555 no
   C(14)     C(19)     H(22)     109.5(9)   1_555 1_555 1_555 no
   H(20)     C(19)     H(21)     109.5(9)   1_555 1_555 1_555 no
   H(20)     C(19)     H(22)     109(1)     1_555 1_555 1_555 no
   H(21)     C(19)     H(22)     109(1)     1_555 1_555 1_555 no
   C(15)     C(20)     H(23)     109.6(9)   1_555 1_555 1_555 no
   C(15)     C(20)     H(24)     109(1)     1_555 1_555 1_555 no
   C(15)     C(20)     H(25)     109.6(10)  1_555 1_555 1_555 no
   H(23)     C(20)     H(24)     109(1)     1_555 1_555 1_555 no
   H(23)     C(20)     H(25)     109(1)     1_555 1_555 1_555 no
   H(24)     C(20)     H(25)     109.3(10)  1_555 1_555 1_555 no
   Ru(2)     C(21)     C(22)     75.1(5)    1_555 1_555 1_555 yes
   Ru(2)     C(21)     C(25)     72.5(5)    1_555 1_555 1_555 yes
   Ru(2)     C(21)     C(26)     125.7(6)   1_555 1_555 1_555 yes
   C(22)     C(21)     C(25)     110.2(8)   1_555 1_555 1_555 yes
   C(22)     C(21)     C(26)     124.7(10)  1_555 1_555 1_555 yes
   C(25)     C(21)     C(26)     124(1)     1_555 1_555 1_555 yes
   Ru(2)     C(22)     C(21)     68.2(5)    1_555 1_555 1_555 yes
   Ru(2)     C(22)     C(23)     73.8(5)    1_555 1_555 1_555 yes
   Ru(2)     C(22)     C(27)     128.0(6)   1_555 1_555 1_555 yes
   C(21)     C(22)     C(23)     107.5(8)   1_555 1_555 1_555 yes
   C(21)     C(22)     C(27)     126.6(9)   1_555 1_555 1_555 yes
   C(23)     C(22)     C(27)     125.5(9)   1_555 1_555 1_555 yes
   Ru(2)     C(23)     C(22)     69.9(4)    1_555 1_555 1_555 yes
   Ru(2)     C(23)     C(24)     70.1(5)    1_555 1_555 1_555 yes
   Ru(2)     C(23)     C(28)     134.6(6)   1_555 1_555 1_555 yes
   C(22)     C(23)     C(24)     107.1(8)   1_555 1_555 1_555 yes
   C(22)     C(23)     C(28)     126.1(9)   1_555 1_555 1_555 yes
   C(24)     C(23)     C(28)     125.6(9)   1_555 1_555 1_555 yes
   Ru(2)     C(24)     C(23)     73.9(5)    1_555 1_555 1_555 yes
   Ru(2)     C(24)     C(25)     69.2(5)    1_555 1_555 1_555 yes
   Ru(2)     C(24)     C(29)     128.1(6)   1_555 1_555 1_555 yes
   C(23)     C(24)     C(25)     109.0(8)   1_555 1_555 1_555 yes
   C(23)     C(24)     C(29)     124.1(9)   1_555 1_555 1_555 yes
   C(25)     C(24)     C(29)     126.6(10)  1_555 1_555 1_555 yes
   Ru(2)     C(25)     C(21)     70.1(5)    1_555 1_555 1_555 yes
   Ru(2)     C(25)     C(24)     73.6(5)    1_555 1_555 1_555 yes
   Ru(2)     C(25)     C(30)     130.0(6)   1_555 1_555 1_555 yes
   C(21)     C(25)     C(24)     106.1(9)   1_555 1_555 1_555 yes
   C(21)     C(25)     C(30)     128.8(10)  1_555 1_555 1_555 yes
   C(24)     C(25)     C(30)     124.2(10)  1_555 1_555 1_555 yes
   C(21)     C(26)     H(26)     109.5(9)   1_555 1_555 1_555 no
   C(21)     C(26)     H(27)     109.6(10)  1_555 1_555 1_555 no
   C(21)     C(26)     H(28)     109.5(10)  1_555 1_555 1_555 no
   H(26)     C(26)     H(27)     109(1)     1_555 1_555 1_555 no
   H(26)     C(26)     H(28)     109(1)     1_555 1_555 1_555 no
   H(27)     C(26)     H(28)     109.4(10)  1_555 1_555 1_555 no
   C(22)     C(27)     H(29)     109.5(9)   1_555 1_555 1_555 no
   C(22)     C(27)     H(30)     109.5(10)  1_555 1_555 1_555 no
   C(22)     C(27)     H(31)     109.5(10)  1_555 1_555 1_555 no
   H(29)     C(27)     H(30)     109(1)     1_555 1_555 1_555 no
   H(29)     C(27)     H(31)     109(1)     1_555 1_555 1_555 no
   H(30)     C(27)     H(31)     109.4(10)  1_555 1_555 1_555 no
   C(23)     C(28)     H(32)     109.5(9)   1_555 1_555 1_555 no
   C(23)     C(28)     H(33)     109.5(9)   1_555 1_555 1_555 no
   C(23)     C(28)     H(34)     109.5(9)   1_555 1_555 1_555 no
   H(32)     C(28)     H(33)     109(1)     1_555 1_555 1_555 no
   H(32)     C(28)     H(34)     109.5(10)  1_555 1_555 1_555 no
   H(33)     C(28)     H(34)     109(1)     1_555 1_555 1_555 no
   C(24)     C(29)     H(35)     109.5(9)   1_555 1_555 1_555 no
   C(24)     C(29)     H(36)     109.5(9)   1_555 1_555 1_555 no
   C(24)     C(29)     H(37)     109(1)     1_555 1_555 1_555 no
   H(35)     C(29)     H(36)     109(1)     1_555 1_555 1_555 no
   H(35)     C(29)     H(37)     109(1)     1_555 1_555 1_555 no
   H(36)     C(29)     H(37)     109(1)     1_555 1_555 1_555 no
   C(25)     C(30)     H(38)     109.5(9)   1_555 1_555 1_555 no
   C(25)     C(30)     H(39)     109.5(9)   1_555 1_555 1_555 no
   C(25)     C(30)     H(40)     109(1)     1_555 1_555 1_555 no
   H(38)     C(30)     H(39)     109(1)     1_555 1_555 1_555 no
   H(38)     C(30)     H(40)     109(1)     1_555 1_555 1_555 no
   H(39)     C(30)     H(40)     109.5(10)  1_555 1_555 1_555 no
   Cl(3)     C(31)     Cl(4)     116.8(8)   1_555 1_555 1_555 yes
   Cl(3)     C(31)     H(41)     107(1)     1_555 1_555 1_555 no
   Cl(3)     C(31)     H(42)     107(1)     1_555 1_555 1_555 no
   Cl(4)     C(31)     H(41)     107(1)     1_555 1_555 1_555 no
   Cl(4)     C(31)     H(42)     107(1)     1_555 1_555 1_555 no
   H(41)     C(31)     H(42)     109(1)     1_555 1_555 1_555 no
#------------------------------------------------------------------------------
loop_
_geom_torsion_atom_site_label_1
_geom_torsion_atom_site_label_2
_geom_torsion_atom_site_label_3
_geom_torsion_atom_site_label_4
_geom_torsion
_geom_torsion_site_symmetry_1
_geom_torsion_site_symmetry_2
_geom_torsion_site_symmetry_3
_geom_torsion_site_symmetry_4
_geom_torsion_publ_flag
   Ru(1)   Ru(2)   Ti(2)   S(1)    -39.56(7) 1_555 1_555 1_555 1_555 yes
   Ru(1)   Ru(2)   Ti(2)   S(2)    -129.67(9) 1_555 1_555 1_555 1_555 yes
   Ru(1)   Ru(2)   Ti(2)   S(4)    64.35(8) 1_555 1_555 1_555 1_555 yes
   Ru(1)   Ru(2)   Ti(2)   C(6)    112.5(6) 1_555 1_555 1_555 1_555 yes
   Ru(1)   Ru(2)   Ti(2)   C(7)    151.1(6) 1_555 1_555 1_555 1_555 yes
   Ru(1)   Ru(2)   Ti(2)   C(8)    -174.6(5) 1_555 1_555 1_555 1_555 yes
   Ru(1)   Ru(2)   Ti(2)   C(9)    -170(2)  1_555 1_555 1_555 1_555 yes
   Ru(1)   Ru(2)   Ti(2)   C(10)   81.9(7)  1_555 1_555 1_555 1_555 yes
   Ru(1)   Ru(2)   S(2)    Ti(1)   -47.28(8) 1_555 1_555 1_555 1_555 yes
   Ru(1)   Ru(2)   S(2)    Ti(2)   42.24(7) 1_555 1_555 1_555 1_555 yes
   Ru(1)   Ru(2)   S(3)    Ti(1)   101.05(9) 1_555 1_555 1_555 1_555 yes
   Ru(1)   Ru(2)   S(4)    Ti(2)   -80.62(8) 1_555 1_555 1_555 1_555 yes
   Ru(1)   Ru(2)   C(21)   C(22)   44.3(9)  1_555 1_555 1_555 1_555 yes
   Ru(1)   Ru(2)   C(21)   C(25)   161.7(5) 1_555 1_555 1_555 1_555 yes
   Ru(1)   Ru(2)   C(21)   C(26)   -77(1)   1_555 1_555 1_555 1_555 yes
   Ru(1)   Ru(2)   C(22)   C(21)   -161.0(4) 1_555 1_555 1_555 1_555 yes
   Ru(1)   Ru(2)   C(22)   C(23)   82.0(6)  1_555 1_555 1_555 1_555 yes
   Ru(1)   Ru(2)   C(22)   C(27)   -40(1)   1_555 1_555 1_555 1_555 yes
   Ru(1)   Ru(2)   C(23)   C(22)   -118.2(5) 1_555 1_555 1_555 1_555 yes
   Ru(1)   Ru(2)   C(23)   C(24)   124.0(5) 1_555 1_555 1_555 1_555 yes
   Ru(1)   Ru(2)   C(23)   C(28)   3(1)     1_555 1_555 1_555 1_555 yes
   Ru(1)   Ru(2)   C(24)   C(23)   -76.7(5) 1_555 1_555 1_555 1_555 yes
   Ru(1)   Ru(2)   C(24)   C(25)   165.1(4) 1_555 1_555 1_555 1_555 yes
   Ru(1)   Ru(2)   C(24)   C(29)   44(1)    1_555 1_555 1_555 1_555 yes
   Ru(1)   Ru(2)   C(25)   C(21)   -156.5(6) 1_555 1_555 1_555 1_555 yes
   Ru(1)   Ru(2)   C(25)   C(24)   -42(1)   1_555 1_555 1_555 1_555 yes
   Ru(1)   Ru(2)   C(25)   C(30)   79(1)    1_555 1_555 1_555 1_555 yes
   Ru(1)   Ti(2)   Ru(2)   S(2)    129.67(9) 1_555 1_555 1_555 1_555 yes
   Ru(1)   Ti(2)   Ru(2)   S(3)    48.45(7) 1_555 1_555 1_555 1_555 yes
   Ru(1)   Ti(2)   Ru(2)   S(4)    -64.35(8) 1_555 1_555 1_555 1_555 yes
   Ru(1)   Ti(2)   Ru(2)   C(21)   -155.3(3) 1_555 1_555 1_555 1_555 yes
   Ru(1)   Ti(2)   Ru(2)   C(22)   -114.2(3) 1_555 1_555 1_555 1_555 yes
   Ru(1)   Ti(2)   Ru(2)   C(23)   -80.9(6) 1_555 1_555 1_555 1_555 yes
   Ru(1)   Ti(2)   Ru(2)   C(24)   132.7(9) 1_555 1_555 1_555 1_555 yes
   Ru(1)   Ti(2)   Ru(2)   C(25)   163.7(3) 1_555 1_555 1_555 1_555 yes
   Ru(1)   Ti(2)   S(1)    Ti(1)   -102.86(8) 1_555 1_555 1_555 1_555 yes
   Ru(1)   Ti(2)   S(2)    Ru(2)   -40.52(6) 1_555 1_555 1_555 1_555 yes
   Ru(1)   Ti(2)   S(2)    Ti(1)   61.69(7) 1_555 1_555 1_555 1_555 yes
   Ru(1)   Ti(2)   S(4)    Ru(2)   76.32(6) 1_555 1_555 1_555 1_555 yes
   Ru(1)   Ti(2)   C(6)    C(7)    162.8(8) 1_555 1_555 1_555 1_555 yes
   Ru(1)   Ti(2)   C(6)    C(10)   -81(1)   1_555 1_555 1_555 1_555 yes
   Ru(1)   Ti(2)   C(7)    C(6)    -35(1)   1_555 1_555 1_555 1_555 yes
   Ru(1)   Ti(2)   C(7)    C(8)    -151.6(8) 1_555 1_555 1_555 1_555 yes
   Ru(1)   Ti(2)   C(8)    C(7)    131(1)   1_555 1_555 1_555 1_555 yes
   Ru(1)   Ti(2)   C(8)    C(9)    16(1)    1_555 1_555 1_555 1_555 yes
   Ru(1)   Ti(2)   C(9)    C(8)    -174.3(7) 1_555 1_555 1_555 1_555 yes
   Ru(1)   Ti(2)   C(9)    C(10)   70.9(9)  1_555 1_555 1_555 1_555 yes
   Ru(1)   Ti(2)   C(10)   C(6)    116(1)   1_555 1_555 1_555 1_555 yes
   Ru(1)   Ti(2)   C(10)   C(9)    -128.8(8) 1_555 1_555 1_555 1_555 yes
   Ru(1)   S(1)    Ti(1)   Cl(1)   85.9(1)  1_555 1_555 1_555 1_555 yes
   Ru(1)   S(1)    Ti(1)   Cl(2)   -0.3(3)  1_555 1_555 1_555 1_555 yes
   Ru(1)   S(1)    Ti(1)   S(2)    -68.87(9) 1_555 1_555 1_555 1_555 yes
   Ru(1)   S(1)    Ti(1)   S(3)    6.11(8)  1_555 1_555 1_555 1_555 yes
   Ru(1)   S(1)    Ti(1)   C(1)    165.0(4) 1_555 1_555 1_555 1_555 yes
   Ru(1)   S(1)    Ti(1)   C(2)    164.2(3) 1_555 1_555 1_555 1_555 yes
   Ru(1)   S(1)    Ti(1)   C(3)    -165.3(4) 1_555 1_555 1_555 1_555 yes
   Ru(1)   S(1)    Ti(1)   C(4)    -142.3(3) 1_555 1_555 1_555 1_555 yes
   Ru(1)   S(1)    Ti(1)   C(5)    -153.8(5) 1_555 1_555 1_555 1_555 yes
   Ru(1)   S(1)    Ti(2)   Ru(2)   42.14(6) 1_555 1_555 1_555 1_555 yes
   Ru(1)   S(1)    Ti(2)   S(2)    94.23(8) 1_555 1_555 1_555 1_555 yes
   Ru(1)   S(1)    Ti(2)   S(4)    -8.11(10) 1_555 1_555 1_555 1_555 yes
   Ru(1)   S(1)    Ti(2)   C(6)    -104.3(5) 1_555 1_555 1_555 1_555 yes
   Ru(1)   S(1)    Ti(2)   C(7)    -154.7(9) 1_555 1_555 1_555 1_555 yes
   Ru(1)   S(1)    Ti(2)   C(8)    -169.2(3) 1_555 1_555 1_555 1_555 yes
   Ru(1)   S(1)    Ti(2)   C(9)    -144.1(4) 1_555 1_555 1_555 1_555 yes
   Ru(1)   S(1)    Ti(2)   C(10)   -111.4(4) 1_555 1_555 1_555 1_555 yes
   Ru(1)   S(3)    Ru(2)   Ti(2)   -54.91(5) 1_555 1_555 1_555 1_555 yes
   Ru(1)   S(3)    Ru(2)   S(2)    -104.41(7) 1_555 1_555 1_555 1_555 yes
   Ru(1)   S(3)    Ru(2)   S(4)    -8.71(8) 1_555 1_555 1_555 1_555 yes
   Ru(1)   S(3)    Ru(2)   C(21)   169.6(5) 1_555 1_555 1_555 1_555 yes
   Ru(1)   S(3)    Ru(2)   C(22)   100.9(4) 1_555 1_555 1_555 1_555 yes
   Ru(1)   S(3)    Ru(2)   C(23)   106.4(3) 1_555 1_555 1_555 1_555 yes
   Ru(1)   S(3)    Ru(2)   C(24)   139.3(2) 1_555 1_555 1_555 1_555 yes
   Ru(1)   S(3)    Ru(2)   C(25)   172.1(3) 1_555 1_555 1_555 1_555 yes
   Ru(1)   S(3)    Ti(1)   Cl(1)   -96.0(1) 1_555 1_555 1_555 1_555 yes
   Ru(1)   S(3)    Ti(1)   Cl(2)   170.5(1) 1_555 1_555 1_555 1_555 yes
   Ru(1)   S(3)    Ti(1)   S(1)    -6.31(9) 1_555 1_555 1_555 1_555 yes
   Ru(1)   S(3)    Ti(1)   S(2)    80.47(9) 1_555 1_555 1_555 1_555 yes
   Ru(1)   S(3)    Ti(1)   C(1)    -138(1)  1_555 1_555 1_555 1_555 yes
   Ru(1)   S(3)    Ti(1)   C(2)    -58.0(9) 1_555 1_555 1_555 1_555 yes
   Ru(1)   S(3)    Ti(1)   C(3)    10.0(8)  1_555 1_555 1_555 1_555 yes
   Ru(1)   S(3)    Ti(1)   C(4)    71.5(8)  1_555 1_555 1_555 1_555 yes
   Ru(1)   S(3)    Ti(1)   C(5)    138(1)   1_555 1_555 1_555 1_555 yes
   Ru(1)   S(4)    Ru(2)   Ti(2)   80.62(8) 1_555 1_555 1_555 1_555 yes
   Ru(1)   S(4)    Ru(2)   S(2)    91.32(8) 1_555 1_555 1_555 1_555 yes
   Ru(1)   S(4)    Ru(2)   S(3)    8.72(8)  1_555 1_555 1_555 1_555 yes
   Ru(1)   S(4)    Ru(2)   C(21)   -170.4(2) 1_555 1_555 1_555 1_555 yes
   Ru(1)   S(4)    Ru(2)   C(22)   -137.6(2) 1_555 1_555 1_555 1_555 yes
   Ru(1)   S(4)    Ru(2)   C(23)   -106.2(2) 1_555 1_555 1_555 1_555 yes
   Ru(1)   S(4)    Ru(2)   C(24)   -106.5(4) 1_555 1_555 1_555 1_555 yes
   Ru(1)   S(4)    Ru(2)   C(25)   -172.6(4) 1_555 1_555 1_555 1_555 yes
   Ru(1)   S(4)    Ti(2)   Ru(2)   -76.32(6) 1_555 1_555 1_555 1_555 yes
   Ru(1)   S(4)    Ti(2)   S(1)    8.3(1)   1_555 1_555 1_555 1_555 yes
   Ru(1)   S(4)    Ti(2)   S(2)    -87.54(10) 1_555 1_555 1_555 1_555 yes
   Ru(1)   S(4)    Ti(2)   C(6)    142.8(6) 1_555 1_555 1_555 1_555 yes
   Ru(1)   S(4)    Ti(2)   C(7)    169.5(4) 1_555 1_555 1_555 1_555 yes
   Ru(1)   S(4)    Ti(2)   C(8)    162.3(5) 1_555 1_555 1_555 1_555 yes
   Ru(1)   S(4)    Ti(2)   C(9)    113.2(5) 1_555 1_555 1_555 1_555 yes
   Ru(1)   S(4)    Ti(2)   C(10)   112.7(4) 1_555 1_555 1_555 1_555 yes
   Ru(1)   C(11)   C(12)   C(13)   -61.1(6) 1_555 1_555 1_555 1_555 yes
   Ru(1)   C(11)   C(12)   C(17)   123(1)   1_555 1_555 1_555 1_555 yes
   Ru(1)   C(11)   C(15)   C(14)   64.9(7)  1_555 1_555 1_555 1_555 yes
   Ru(1)   C(11)   C(15)   C(20)   -124(1)  1_555 1_555 1_555 1_555 yes
   Ru(1)   C(12)   C(11)   C(15)   60.7(7)  1_555 1_555 1_555 1_555 yes
   Ru(1)   C(12)   C(11)   C(16)   -123.2(9) 1_555 1_555 1_555 1_555 yes
   Ru(1)   C(12)   C(13)   C(14)   -63.2(6) 1_555 1_555 1_555 1_555 yes
   Ru(1)   C(12)   C(13)   C(18)   124.2(10) 1_555 1_555 1_555 1_555 yes
   Ru(1)   C(13)   C(12)   C(11)   61.5(7)  1_555 1_555 1_555 1_555 yes
   Ru(1)   C(13)   C(12)   C(17)   -123.0(10) 1_555 1_555 1_555 1_555 yes
   Ru(1)   C(13)   C(14)   C(15)   -60.6(6) 1_555 1_555 1_555 1_555 yes
   Ru(1)   C(13)   C(14)   C(19)   122.7(10) 1_555 1_555 1_555 1_555 yes
   Ru(1)   C(14)   C(13)   C(12)   63.6(6)  1_555 1_555 1_555 1_555 yes
   Ru(1)   C(14)   C(13)   C(18)   -123.9(10) 1_555 1_555 1_555 1_555 yes
   Ru(1)   C(14)   C(15)   C(11)   -65.1(7) 1_555 1_555 1_555 1_555 yes
   Ru(1)   C(14)   C(15)   C(20)   124.0(10) 1_555 1_555 1_555 1_555 yes
   Ru(1)   C(15)   C(11)   C(12)   -62.6(7) 1_555 1_555 1_555 1_555 yes
   Ru(1)   C(15)   C(11)   C(16)   121.4(9) 1_555 1_555 1_555 1_555 yes
   Ru(1)   C(15)   C(14)   C(13)   61.8(6)  1_555 1_555 1_555 1_555 yes
   Ru(1)   C(15)   C(14)   C(19)   -121.3(9) 1_555 1_555 1_555 1_555 yes
   Ru(2)   Ru(1)   Ti(2)   S(1)    127.30(9) 1_555 1_555 1_555 1_555 yes
   Ru(2)   Ru(1)   Ti(2)   S(2)    37.51(7) 1_555 1_555 1_555 1_555 yes
   Ru(2)   Ru(1)   Ti(2)   S(4)    -62.82(9) 1_555 1_555 1_555 1_555 yes
   Ru(2)   Ru(1)   Ti(2)   C(6)    -109.6(5) 1_555 1_555 1_555 1_555 yes
   Ru(2)   Ru(1)   Ti(2)   C(7)    -87.1(8) 1_555 1_555 1_555 1_555 yes
   Ru(2)   Ru(1)   Ti(2)   C(8)    166(1)   1_555 1_555 1_555 1_555 yes
   Ru(2)   Ru(1)   Ti(2)   C(9)    178.3(5) 1_555 1_555 1_555 1_555 yes
   Ru(2)   Ru(1)   Ti(2)   C(10)   -146.3(5) 1_555 1_555 1_555 1_555 yes
   Ru(2)   Ru(1)   S(1)    Ti(1)   43.54(8) 1_555 1_555 1_555 1_555 yes
   Ru(2)   Ru(1)   S(1)    Ti(2)   -45.26(7) 1_555 1_555 1_555 1_555 yes
   Ru(2)   Ru(1)   S(3)    Ti(1)   -100.09(9) 1_555 1_555 1_555 1_555 yes
   Ru(2)   Ru(1)   S(4)    Ti(2)   83.03(9) 1_555 1_555 1_555 1_555 yes
   Ru(2)   Ru(1)   C(11)   C(12)   33(2)    1_555 1_555 1_555 1_555 yes
   Ru(2)   Ru(1)   C(11)   C(15)   -85(1)   1_555 1_555 1_555 1_555 yes
   Ru(2)   Ru(1)   C(11)   C(16)   153(1)   1_555 1_555 1_555 1_555 yes
   Ru(2)   Ru(1)   C(12)   C(11)   -173.7(4) 1_555 1_555 1_555 1_555 yes
   Ru(2)   Ru(1)   C(12)   C(13)   -56.2(7) 1_555 1_555 1_555 1_555 yes
   Ru(2)   Ru(1)   C(12)   C(17)   63(1)    1_555 1_555 1_555 1_555 yes
   Ru(2)   Ru(1)   C(13)   C(12)   143.1(5) 1_555 1_555 1_555 1_555 yes
   Ru(2)   Ru(1)   C(13)   C(14)   -100.8(5) 1_555 1_555 1_555 1_555 yes
   Ru(2)   Ru(1)   C(13)   C(18)   21(1)    1_555 1_555 1_555 1_555 yes
   Ru(2)   Ru(1)   C(14)   C(13)   94.7(5)  1_555 1_555 1_555 1_555 yes
   Ru(2)   Ru(1)   C(14)   C(15)   -148.2(5) 1_555 1_555 1_555 1_555 yes
   Ru(2)   Ru(1)   C(14)   C(19)   -29(1)   1_555 1_555 1_555 1_555 yes
   Ru(2)   Ru(1)   C(15)   C(11)   167.6(4) 1_555 1_555 1_555 1_555 yes
   Ru(2)   Ru(1)   C(15)   C(14)   51.9(7)  1_555 1_555 1_555 1_555 yes
   Ru(2)   Ru(1)   C(15)   C(20)   -68(1)   1_555 1_555 1_555 1_555 yes
   Ru(2)   Ti(2)   Ru(1)   S(1)    -127.30(9) 1_555 1_555 1_555 1_555 yes
   Ru(2)   Ti(2)   Ru(1)   S(3)    -48.39(6) 1_555 1_555 1_555 1_555 yes
   Ru(2)   Ti(2)   Ru(1)   S(4)    62.82(9) 1_555 1_555 1_555 1_555 yes
   Ru(2)   Ti(2)   Ru(1)   C(11)   172.9(3) 1_555 1_555 1_555 1_555 yes
   Ru(2)   Ti(2)   Ru(1)   C(12)   132.1(3) 1_555 1_555 1_555 1_555 yes
   Ru(2)   Ti(2)   Ru(1)   C(13)   92.0(3)  1_555 1_555 1_555 1_555 yes
   Ru(2)   Ti(2)   Ru(1)   C(14)   58(1)    1_555 1_555 1_555 1_555 yes
   Ru(2)   Ti(2)   Ru(1)   C(15)   -150.3(5) 1_555 1_555 1_555 1_555 yes
   Ru(2)   Ti(2)   S(1)    Ti(1)   -60.72(7) 1_555 1_555 1_555 1_555 yes
   Ru(2)   Ti(2)   S(2)    Ti(1)   102.21(9) 1_555 1_555 1_555 1_555 yes
   Ru(2)   Ti(2)   C(6)    C(7)    92.8(9)  1_555 1_555 1_555 1_555 yes
   Ru(2)   Ti(2)   C(6)    C(10)   -151.8(9) 1_555 1_555 1_555 1_555 yes
   Ru(2)   Ti(2)   C(7)    C(6)    -107.2(9) 1_555 1_555 1_555 1_555 yes
   Ru(2)   Ti(2)   C(7)    C(8)    136.1(8) 1_555 1_555 1_555 1_555 yes
   Ru(2)   Ti(2)   C(8)    C(7)    -65(1)   1_555 1_555 1_555 1_555 yes
   Ru(2)   Ti(2)   C(8)    C(9)    179.1(7) 1_555 1_555 1_555 1_555 yes
   Ru(2)   Ti(2)   C(9)    C(8)    -4(2)    1_555 1_555 1_555 1_555 yes
   Ru(2)   Ti(2)   C(9)    C(10)   -119(2)  1_555 1_555 1_555 1_555 yes
   Ru(2)   Ti(2)   C(10)   C(6)    51(1)    1_555 1_555 1_555 1_555 yes
   Ru(2)   Ti(2)   C(10)   C(9)    165.7(6) 1_555 1_555 1_555 1_555 yes
   Ru(2)   S(2)    Ti(1)   Cl(1)   4.3(3)   1_555 1_555 1_555 1_555 yes
   Ru(2)   S(2)    Ti(1)   Cl(2)   -82.21(10) 1_555 1_555 1_555 1_555 yes
   Ru(2)   S(2)    Ti(1)   S(1)    70.83(9) 1_555 1_555 1_555 1_555 yes
   Ru(2)   S(2)    Ti(1)   S(3)    -3.16(8) 1_555 1_555 1_555 1_555 yes
   Ru(2)   S(2)    Ti(1)   C(1)    -164.7(4) 1_555 1_555 1_555 1_555 yes
   Ru(2)   S(2)    Ti(1)   C(2)    153.8(5) 1_555 1_555 1_555 1_555 yes
   Ru(2)   S(2)    Ti(1)   C(3)    147.5(3) 1_555 1_555 1_555 1_555 yes
   Ru(2)   S(2)    Ti(1)   C(4)    171.9(4) 1_555 1_555 1_555 1_555 yes
   Ru(2)   S(2)    Ti(1)   C(5)    -159.7(3) 1_555 1_555 1_555 1_555 yes
   Ru(2)   S(2)    Ti(2)   S(1)    -93.56(8) 1_555 1_555 1_555 1_555 yes
   Ru(2)   S(2)    Ti(2)   S(4)    10.96(9) 1_555 1_555 1_555 1_555 yes
   Ru(2)   S(2)    Ti(2)   C(6)    103.7(4) 1_555 1_555 1_555 1_555 yes
   Ru(2)   S(2)    Ti(2)   C(7)    118.6(4) 1_555 1_555 1_555 1_555 yes
   Ru(2)   S(2)    Ti(2)   C(8)    151.7(4) 1_555 1_555 1_555 1_555 yes
   Ru(2)   S(2)    Ti(2)   C(9)    173.5(3) 1_555 1_555 1_555 1_555 yes
   Ru(2)   S(2)    Ti(2)   C(10)   146.6(10) 1_555 1_555 1_555 1_555 yes
   Ru(2)   S(3)    Ru(1)   Ti(2)   56.48(5) 1_555 1_555 1_555 1_555 yes
   Ru(2)   S(3)    Ru(1)   S(1)    106.60(8) 1_555 1_555 1_555 1_555 yes
   Ru(2)   S(3)    Ru(1)   S(4)    8.72(8)  1_555 1_555 1_555 1_555 yes
   Ru(2)   S(3)    Ru(1)   C(11)   -171.4(3) 1_555 1_555 1_555 1_555 yes
   Ru(2)   S(3)    Ru(1)   C(12)   -124.6(7) 1_555 1_555 1_555 1_555 yes
   Ru(2)   S(3)    Ru(1)   C(13)   -91.2(3) 1_555 1_555 1_555 1_555 yes
   Ru(2)   S(3)    Ru(1)   C(14)   -115.4(3) 1_555 1_555 1_555 1_555 yes
   Ru(2)   S(3)    Ru(1)   C(15)   -153.3(3) 1_555 1_555 1_555 1_555 yes
   Ru(2)   S(3)    Ti(1)   Cl(1)   -173.2(1) 1_555 1_555 1_555 1_555 yes
   Ru(2)   S(3)    Ti(1)   Cl(2)   93.3(1)  1_555 1_555 1_555 1_555 yes
   Ru(2)   S(3)    Ti(1)   S(1)    -83.52(10) 1_555 1_555 1_555 1_555 yes
   Ru(2)   S(3)    Ti(1)   S(2)    3.26(9)  1_555 1_555 1_555 1_555 yes
   Ru(2)   S(3)    Ti(1)   C(1)    143(1)   1_555 1_555 1_555 1_555 yes
   Ru(2)   S(3)    Ti(1)   C(2)    -135.2(9) 1_555 1_555 1_555 1_555 yes
   Ru(2)   S(3)    Ti(1)   C(3)    -67.2(8) 1_555 1_555 1_555 1_555 yes
   Ru(2)   S(3)    Ti(1)   C(4)    -5.7(8)  1_555 1_555 1_555 1_555 yes
   Ru(2)   S(3)    Ti(1)   C(5)    61(1)    1_555 1_555 1_555 1_555 yes
   Ru(2)   S(4)    Ru(1)   Ti(2)   -83.03(9) 1_555 1_555 1_555 1_555 yes
   Ru(2)   S(4)    Ru(1)   S(1)    -90.93(7) 1_555 1_555 1_555 1_555 yes
   Ru(2)   S(4)    Ru(1)   S(3)    -8.73(8) 1_555 1_555 1_555 1_555 yes
   Ru(2)   S(4)    Ru(1)   C(11)   171.4(3) 1_555 1_555 1_555 1_555 yes
   Ru(2)   S(4)    Ru(1)   C(12)   154.3(2) 1_555 1_555 1_555 1_555 yes
   Ru(2)   S(4)    Ru(1)   C(13)   116.8(2) 1_555 1_555 1_555 1_555 yes
   Ru(2)   S(4)    Ru(1)   C(14)   96.2(3)  1_555 1_555 1_555 1_555 yes
   Ru(2)   S(4)    Ru(1)   C(15)   131.8(5) 1_555 1_555 1_555 1_555 yes
   Ru(2)   S(4)    Ti(2)   S(1)    84.62(10) 1_555 1_555 1_555 1_555 yes
   Ru(2)   S(4)    Ti(2)   S(2)    -11.22(9) 1_555 1_555 1_555 1_555 yes
   Ru(2)   S(4)    Ti(2)   C(6)    -140.9(6) 1_555 1_555 1_555 1_555 yes
   Ru(2)   S(4)    Ti(2)   C(7)    -114.2(4) 1_555 1_555 1_555 1_555 yes
   Ru(2)   S(4)    Ti(2)   C(8)    -121.4(5) 1_555 1_555 1_555 1_555 yes
   Ru(2)   S(4)    Ti(2)   C(9)    -170.4(5) 1_555 1_555 1_555 1_555 yes
   Ru(2)   S(4)    Ti(2)   C(10)   -171.0(4) 1_555 1_555 1_555 1_555 yes
   Ru(2)   C(21)   C(22)   C(23)   63.8(6)  1_555 1_555 1_555 1_555 yes
   Ru(2)   C(21)   C(22)   C(27)   -121.9(9) 1_555 1_555 1_555 1_555 yes
   Ru(2)   C(21)   C(25)   C(24)   -65.4(6) 1_555 1_555 1_555 1_555 yes
   Ru(2)   C(21)   C(25)   C(30)   125.9(9) 1_555 1_555 1_555 1_555 yes
   Ru(2)   C(22)   C(21)   C(25)   -64.6(6) 1_555 1_555 1_555 1_555 yes
   Ru(2)   C(22)   C(21)   C(26)   123.4(9) 1_555 1_555 1_555 1_555 yes
   Ru(2)   C(22)   C(23)   C(24)   60.5(5)  1_555 1_555 1_555 1_555 yes
   Ru(2)   C(22)   C(23)   C(28)   -131.2(9) 1_555 1_555 1_555 1_555 yes
   Ru(2)   C(23)   C(22)   C(21)   -60.2(6) 1_555 1_555 1_555 1_555 yes
   Ru(2)   C(23)   C(22)   C(27)   125.5(9) 1_555 1_555 1_555 1_555 yes
   Ru(2)   C(23)   C(24)   C(25)   60.6(6)  1_555 1_555 1_555 1_555 yes
   Ru(2)   C(23)   C(24)   C(29)   -125.5(8) 1_555 1_555 1_555 1_555 yes
   Ru(2)   C(24)   C(23)   C(22)   -60.4(5) 1_555 1_555 1_555 1_555 yes
   Ru(2)   C(24)   C(23)   C(28)   131.2(8) 1_555 1_555 1_555 1_555 yes
   Ru(2)   C(24)   C(25)   C(21)   63.0(6)  1_555 1_555 1_555 1_555 yes
   Ru(2)   C(24)   C(25)   C(30)   -127.6(9) 1_555 1_555 1_555 1_555 yes
   Ru(2)   C(25)   C(21)   C(22)   66.2(6)  1_555 1_555 1_555 1_555 yes
   Ru(2)   C(25)   C(21)   C(26)   -121.7(8) 1_555 1_555 1_555 1_555 yes
   Ru(2)   C(25)   C(24)   C(23)   -63.6(6) 1_555 1_555 1_555 1_555 yes
   Ru(2)   C(25)   C(24)   C(29)   122.7(8) 1_555 1_555 1_555 1_555 yes
   Ti(1)   S(1)    Ru(1)   Ti(2)   88.80(10) 1_555 1_555 1_555 1_555 yes
   Ti(1)   S(1)    Ru(1)   S(3)    -6.57(9) 1_555 1_555 1_555 1_555 yes
   Ti(1)   S(1)    Ru(1)   S(4)    96.7(1)  1_555 1_555 1_555 1_555 yes
   Ti(1)   S(1)    Ru(1)   C(11)   -138.3(3) 1_555 1_555 1_555 1_555 yes
   Ti(1)   S(1)    Ru(1)   C(12)   -166.5(3) 1_555 1_555 1_555 1_555 yes
   Ti(1)   S(1)    Ru(1)   C(13)   -155.5(5) 1_555 1_555 1_555 1_555 yes
   Ti(1)   S(1)    Ru(1)   C(14)   -92.4(4) 1_555 1_555 1_555 1_555 yes
   Ti(1)   S(1)    Ru(1)   C(15)   -102.8(3) 1_555 1_555 1_555 1_555 yes
   Ti(1)   S(1)    Ti(2)   S(2)    -8.63(9) 1_555 1_555 1_555 1_555 yes
   Ti(1)   S(1)    Ti(2)   S(4)    -110.96(10) 1_555 1_555 1_555 1_555 yes
   Ti(1)   S(1)    Ti(2)   C(6)    152.8(5) 1_555 1_555 1_555 1_555 yes
   Ti(1)   S(1)    Ti(2)   C(7)    102.5(9) 1_555 1_555 1_555 1_555 yes
   Ti(1)   S(1)    Ti(2)   C(8)    87.9(3)  1_555 1_555 1_555 1_555 yes
   Ti(1)   S(1)    Ti(2)   C(9)    113.0(4) 1_555 1_555 1_555 1_555 yes
   Ti(1)   S(1)    Ti(2)   C(10)   145.8(4) 1_555 1_555 1_555 1_555 yes
   Ti(1)   S(2)    Ru(2)   Ti(2)   -89.52(10) 1_555 1_555 1_555 1_555 yes
   Ti(1)   S(2)    Ru(2)   S(3)    3.40(9)  1_555 1_555 1_555 1_555 yes
   Ti(1)   S(2)    Ru(2)   S(4)    -100.20(9) 1_555 1_555 1_555 1_555 yes
   Ti(1)   S(2)    Ru(2)   C(21)   152.0(3) 1_555 1_555 1_555 1_555 yes
   Ti(1)   S(2)    Ru(2)   C(22)   164.0(3) 1_555 1_555 1_555 1_555 yes
   Ti(1)   S(2)    Ru(2)   C(23)   113.3(4) 1_555 1_555 1_555 1_555 yes
   Ti(1)   S(2)    Ru(2)   C(24)   91.3(3)  1_555 1_555 1_555 1_555 yes
   Ti(1)   S(2)    Ru(2)   C(25)   115.5(3) 1_555 1_555 1_555 1_555 yes
   Ti(1)   S(2)    Ti(2)   S(1)    8.65(9)  1_555 1_555 1_555 1_555 yes
   Ti(1)   S(2)    Ti(2)   S(4)    113.17(10) 1_555 1_555 1_555 1_555 yes
   Ti(1)   S(2)    Ti(2)   C(6)    -154.1(4) 1_555 1_555 1_555 1_555 yes
   Ti(1)   S(2)    Ti(2)   C(7)    -139.1(4) 1_555 1_555 1_555 1_555 yes
   Ti(1)   S(2)    Ti(2)   C(8)    -106.1(4) 1_555 1_555 1_555 1_555 yes
   Ti(1)   S(2)    Ti(2)   C(9)    -84.2(3) 1_555 1_555 1_555 1_555 yes
   Ti(1)   S(2)    Ti(2)   C(10)   -111.2(10) 1_555 1_555 1_555 1_555 yes
   Ti(1)   S(3)    Ru(1)   Ti(2)   -43.61(8) 1_555 1_555 1_555 1_555 yes
   Ti(1)   S(3)    Ru(1)   S(1)    6.52(9)  1_555 1_555 1_555 1_555 yes
   Ti(1)   S(3)    Ru(1)   S(4)    -91.36(10) 1_555 1_555 1_555 1_555 yes
   Ti(1)   S(3)    Ru(1)   C(11)   88.5(3)  1_555 1_555 1_555 1_555 yes
   Ti(1)   S(3)    Ru(1)   C(12)   135.3(7) 1_555 1_555 1_555 1_555 yes
   Ti(1)   S(3)    Ru(1)   C(13)   168.7(3) 1_555 1_555 1_555 1_555 yes
   Ti(1)   S(3)    Ru(1)   C(14)   144.5(3) 1_555 1_555 1_555 1_555 yes
   Ti(1)   S(3)    Ru(1)   C(15)   106.6(3) 1_555 1_555 1_555 1_555 yes
   Ti(1)   S(3)    Ru(2)   Ti(2)   46.14(8) 1_555 1_555 1_555 1_555 yes
   Ti(1)   S(3)    Ru(2)   S(2)    -3.37(9) 1_555 1_555 1_555 1_555 yes
   Ti(1)   S(3)    Ru(2)   S(4)    92.3(1)  1_555 1_555 1_555 1_555 yes
   Ti(1)   S(3)    Ru(2)   C(21)   -89.4(5) 1_555 1_555 1_555 1_555 yes
   Ti(1)   S(3)    Ru(2)   C(22)   -158.0(4) 1_555 1_555 1_555 1_555 yes
   Ti(1)   S(3)    Ru(2)   C(23)   -152.6(3) 1_555 1_555 1_555 1_555 yes
   Ti(1)   S(3)    Ru(2)   C(24)   -119.6(3) 1_555 1_555 1_555 1_555 yes
   Ti(1)   S(3)    Ru(2)   C(25)   -86.9(3) 1_555 1_555 1_555 1_555 yes
   Ti(1)   C(1)    C(2)    C(3)    67.1(8)  1_555 1_555 1_555 1_555 yes
   Ti(1)   C(1)    C(5)    C(4)    -66.9(9) 1_555 1_555 1_555 1_555 yes
   Ti(1)   C(2)    C(1)    C(5)    -66.5(8) 1_555 1_555 1_555 1_555 yes
   Ti(1)   C(2)    C(3)    C(4)    66.6(9)  1_555 1_555 1_555 1_555 yes
   Ti(1)   C(3)    C(2)    C(1)    -66.9(8) 1_555 1_555 1_555 1_555 yes
   Ti(1)   C(3)    C(4)    C(5)    65.6(9)  1_555 1_555 1_555 1_555 yes
   Ti(1)   C(4)    C(3)    C(2)    -65.7(9) 1_555 1_555 1_555 1_555 yes
   Ti(1)   C(4)    C(5)    C(1)    65.7(8)  1_555 1_555 1_555 1_555 yes
   Ti(1)   C(5)    C(1)    C(2)    66.3(8)  1_555 1_555 1_555 1_555 yes
   Ti(1)   C(5)    C(4)    C(3)    -65.3(9) 1_555 1_555 1_555 1_555 yes
   Ti(2)   Ru(1)   Ru(2)   S(2)    -36.00(7) 1_555 1_555 1_555 1_555 yes
   Ti(2)   Ru(1)   Ru(2)   S(3)    -110.01(8) 1_555 1_555 1_555 1_555 yes
   Ti(2)   Ru(1)   Ru(2)   S(4)    59.35(8) 1_555 1_555 1_555 1_555 yes
   Ti(2)   Ru(1)   Ru(2)   C(21)   84.3(6)  1_555 1_555 1_555 1_555 yes
   Ti(2)   Ru(1)   Ru(2)   C(22)   115.1(3) 1_555 1_555 1_555 1_555 yes
   Ti(2)   Ru(1)   Ru(2)   C(23)   154.8(3) 1_555 1_555 1_555 1_555 yes
   Ti(2)   Ru(1)   Ru(2)   C(24)   -166.6(3) 1_555 1_555 1_555 1_555 yes
   Ti(2)   Ru(1)   Ru(2)   C(25)   -135.3(8) 1_555 1_555 1_555 1_555 yes
   Ti(2)   Ru(1)   C(11)   C(12)   -90.9(5) 1_555 1_555 1_555 1_555 yes
   Ti(2)   Ru(1)   C(11)   C(15)   149.9(5) 1_555 1_555 1_555 1_555 yes
   Ti(2)   Ru(1)   C(11)   C(16)   29.3(10) 1_555 1_555 1_555 1_555 yes
   Ti(2)   Ru(1)   C(12)   C(11)   109.6(5) 1_555 1_555 1_555 1_555 yes
   Ti(2)   Ru(1)   C(12)   C(13)   -132.8(5) 1_555 1_555 1_555 1_555 yes
   Ti(2)   Ru(1)   C(12)   C(17)   -12(1)   1_555 1_555 1_555 1_555 yes
   Ti(2)   Ru(1)   C(13)   C(12)   71.7(6)  1_555 1_555 1_555 1_555 yes
   Ti(2)   Ru(1)   C(13)   C(14)   -172.2(4) 1_555 1_555 1_555 1_555 yes
   Ti(2)   Ru(1)   C(13)   C(18)   -49(1)   1_555 1_555 1_555 1_555 yes
   Ti(2)   Ru(1)   C(14)   C(13)   39(1)    1_555 1_555 1_555 1_555 yes
   Ti(2)   Ru(1)   C(14)   C(15)   157(1)   1_555 1_555 1_555 1_555 yes
   Ti(2)   Ru(1)   C(14)   C(19)   -84(1)   1_555 1_555 1_555 1_555 yes
   Ti(2)   Ru(1)   C(15)   C(11)   -57.8(8) 1_555 1_555 1_555 1_555 yes
   Ti(2)   Ru(1)   C(15)   C(14)   -173.4(4) 1_555 1_555 1_555 1_555 yes
   Ti(2)   Ru(1)   C(15)   C(20)   66(1)    1_555 1_555 1_555 1_555 yes
   Ti(2)   Ru(2)   Ru(1)   S(1)    38.10(7) 1_555 1_555 1_555 1_555 yes
   Ti(2)   Ru(2)   Ru(1)   S(3)    110.01(8) 1_555 1_555 1_555 1_555 yes
   Ti(2)   Ru(2)   Ru(1)   S(4)    -59.35(8) 1_555 1_555 1_555 1_555 yes
   Ti(2)   Ru(2)   Ru(1)   C(11)   -128(1)  1_555 1_555 1_555 1_555 yes
   Ti(2)   Ru(2)   Ru(1)   C(12)   -99.3(3) 1_555 1_555 1_555 1_555 yes
   Ti(2)   Ru(2)   Ru(1)   C(13)   -132.1(3) 1_555 1_555 1_555 1_555 yes
   Ti(2)   Ru(2)   Ru(1)   C(14)   -172.2(3) 1_555 1_555 1_555 1_555 yes
   Ti(2)   Ru(2)   Ru(1)   C(15)   156.2(4) 1_555 1_555 1_555 1_555 yes
   Ti(2)   Ru(2)   C(21)   C(22)   117.1(5) 1_555 1_555 1_555 1_555 yes
   Ti(2)   Ru(2)   C(21)   C(25)   -125.6(5) 1_555 1_555 1_555 1_555 yes
   Ti(2)   Ru(2)   C(21)   C(26)   -5(1)    1_555 1_555 1_555 1_555 yes
   Ti(2)   Ru(2)   C(22)   C(21)   -84.5(5) 1_555 1_555 1_555 1_555 yes
   Ti(2)   Ru(2)   C(22)   C(23)   158.5(4) 1_555 1_555 1_555 1_555 yes
   Ti(2)   Ru(2)   C(22)   C(27)   35(1)    1_555 1_555 1_555 1_555 yes
   Ti(2)   Ru(2)   C(23)   C(22)   -48.7(9) 1_555 1_555 1_555 1_555 yes
   Ti(2)   Ru(2)   C(23)   C(24)   -166.5(4) 1_555 1_555 1_555 1_555 yes
   Ti(2)   Ru(2)   C(23)   C(28)   72(1)    1_555 1_555 1_555 1_555 yes
   Ti(2)   Ru(2)   C(24)   C(23)   158.1(7) 1_555 1_555 1_555 1_555 yes
   Ti(2)   Ru(2)   C(24)   C(25)   39(1)    1_555 1_555 1_555 1_555 yes
   Ti(2)   Ru(2)   C(24)   C(29)   -80(1)   1_555 1_555 1_555 1_555 yes
   Ti(2)   Ru(2)   C(25)   C(21)   77.7(6)  1_555 1_555 1_555 1_555 yes
   Ti(2)   Ru(2)   C(25)   C(24)   -167.8(4) 1_555 1_555 1_555 1_555 yes
   Ti(2)   Ru(2)   C(25)   C(30)   -46(1)   1_555 1_555 1_555 1_555 yes
   Ti(2)   S(1)    Ru(1)   S(3)    -95.37(8) 1_555 1_555 1_555 1_555 yes
   Ti(2)   S(1)    Ru(1)   S(4)    7.88(10) 1_555 1_555 1_555 1_555 yes
   Ti(2)   S(1)    Ru(1)   C(11)   132.9(3) 1_555 1_555 1_555 1_555 yes
   Ti(2)   S(1)    Ru(1)   C(12)   104.7(3) 1_555 1_555 1_555 1_555 yes
   Ti(2)   S(1)    Ru(1)   C(13)   115.7(6) 1_555 1_555 1_555 1_555 yes
   Ti(2)   S(1)    Ru(1)   C(14)   178.8(4) 1_555 1_555 1_555 1_555 yes
   Ti(2)   S(1)    Ru(1)   C(15)   168.4(3) 1_555 1_555 1_555 1_555 yes
   Ti(2)   S(1)    Ti(1)   Cl(1)   162.60(9) 1_555 1_555 1_555 1_555 yes
   Ti(2)   S(1)    Ti(1)   Cl(2)   76.4(2)  1_555 1_555 1_555 1_555 yes
   Ti(2)   S(1)    Ti(1)   S(2)    7.88(8)  1_555 1_555 1_555 1_555 yes
   Ti(2)   S(1)    Ti(1)   S(3)    82.86(9) 1_555 1_555 1_555 1_555 yes
   Ti(2)   S(1)    Ti(1)   C(1)    -118.2(4) 1_555 1_555 1_555 1_555 yes
   Ti(2)   S(1)    Ti(1)   C(2)    -119.1(3) 1_555 1_555 1_555 1_555 yes
   Ti(2)   S(1)    Ti(1)   C(3)    -88.6(4) 1_555 1_555 1_555 1_555 yes
   Ti(2)   S(1)    Ti(1)   C(4)    -65.5(3) 1_555 1_555 1_555 1_555 yes
   Ti(2)   S(1)    Ti(1)   C(5)    -77.1(5) 1_555 1_555 1_555 1_555 yes
   Ti(2)   S(2)    Ru(2)   S(3)    92.93(9) 1_555 1_555 1_555 1_555 yes
   Ti(2)   S(2)    Ru(2)   S(4)    -10.68(9) 1_555 1_555 1_555 1_555 yes
   Ti(2)   S(2)    Ru(2)   C(21)   -118.5(3) 1_555 1_555 1_555 1_555 yes
   Ti(2)   S(2)    Ru(2)   C(22)   -106.5(3) 1_555 1_555 1_555 1_555 yes
   Ti(2)   S(2)    Ru(2)   C(23)   -157.2(4) 1_555 1_555 1_555 1_555 yes
   Ti(2)   S(2)    Ru(2)   C(24)   -179.2(2) 1_555 1_555 1_555 1_555 yes
   Ti(2)   S(2)    Ru(2)   C(25)   -155.0(3) 1_555 1_555 1_555 1_555 yes
   Ti(2)   S(2)    Ti(1)   Cl(1)   -74.4(2) 1_555 1_555 1_555 1_555 yes
   Ti(2)   S(2)    Ti(1)   Cl(2)   -160.93(10) 1_555 1_555 1_555 1_555 yes
   Ti(2)   S(2)    Ti(1)   S(1)    -7.89(8) 1_555 1_555 1_555 1_555 yes
   Ti(2)   S(2)    Ti(1)   S(3)    -81.88(9) 1_555 1_555 1_555 1_555 yes
   Ti(2)   S(2)    Ti(1)   C(1)    116.5(4) 1_555 1_555 1_555 1_555 yes
   Ti(2)   S(2)    Ti(1)   C(2)    75.0(5)  1_555 1_555 1_555 1_555 yes
   Ti(2)   S(2)    Ti(1)   C(3)    68.8(3)  1_555 1_555 1_555 1_555 yes
   Ti(2)   S(2)    Ti(1)   C(4)    93.2(4)  1_555 1_555 1_555 1_555 yes
   Ti(2)   S(2)    Ti(1)   C(5)    121.5(3) 1_555 1_555 1_555 1_555 yes
   Ti(2)   S(4)    Ru(1)   S(1)    -7.90(10) 1_555 1_555 1_555 1_555 yes
   Ti(2)   S(4)    Ru(1)   S(3)    74.31(9) 1_555 1_555 1_555 1_555 yes
   Ti(2)   S(4)    Ru(1)   C(11)   -105.6(3) 1_555 1_555 1_555 1_555 yes
   Ti(2)   S(4)    Ru(1)   C(12)   -122.7(2) 1_555 1_555 1_555 1_555 yes
   Ti(2)   S(4)    Ru(1)   C(13)   -160.2(3) 1_555 1_555 1_555 1_555 yes
   Ti(2)   S(4)    Ru(1)   C(14)   179.2(3) 1_555 1_555 1_555 1_555 yes
   Ti(2)   S(4)    Ru(1)   C(15)   -145.2(5) 1_555 1_555 1_555 1_555 yes
   Ti(2)   S(4)    Ru(2)   S(2)    10.71(9) 1_555 1_555 1_555 1_555 yes
   Ti(2)   S(4)    Ru(2)   S(3)    -71.89(9) 1_555 1_555 1_555 1_555 yes
   Ti(2)   S(4)    Ru(2)   C(21)   109.0(3) 1_555 1_555 1_555 1_555 yes
   Ti(2)   S(4)    Ru(2)   C(22)   141.7(3) 1_555 1_555 1_555 1_555 yes
   Ti(2)   S(4)    Ru(2)   C(23)   173.2(2) 1_555 1_555 1_555 1_555 yes
   Ti(2)   S(4)    Ru(2)   C(24)   172.9(4) 1_555 1_555 1_555 1_555 yes
   Ti(2)   S(4)    Ru(2)   C(25)   106.8(4) 1_555 1_555 1_555 1_555 yes
   Ti(2)   C(6)    C(7)    C(8)    66.5(9)  1_555 1_555 1_555 1_555 yes
   Ti(2)   C(6)    C(10)   C(9)    -65.3(8) 1_555 1_555 1_555 1_555 yes
   Ti(2)   C(7)    C(6)    C(10)   -64.7(8) 1_555 1_555 1_555 1_555 yes
   Ti(2)   C(7)    C(8)    C(9)    65.3(7)  1_555 1_555 1_555 1_555 yes
   Ti(2)   C(8)    C(7)    C(6)    -66.8(9) 1_555 1_555 1_555 1_555 yes
   Ti(2)   C(8)    C(9)    C(10)   65.6(8)  1_555 1_555 1_555 1_555 yes
   Ti(2)   C(9)    C(8)    C(7)    -65.0(7) 1_555 1_555 1_555 1_555 yes
   Ti(2)   C(9)    C(10)   C(6)    65.9(8)  1_555 1_555 1_555 1_555 yes
   Ti(2)   C(10)   C(6)    C(7)    64.0(9)  1_555 1_555 1_555 1_555 yes
   Ti(2)   C(10)   C(9)    C(8)    -65.5(7) 1_555 1_555 1_555 1_555 yes
   Cl(1)   Ti(1)   C(1)    C(2)    79.6(10) 1_555 1_555 1_555 1_555 yes
   Cl(1)   Ti(1)   C(1)    C(5)    -165.9(10) 1_555 1_555 1_555 1_555 yes
   Cl(1)   Ti(1)   C(2)    C(1)    -94.7(10) 1_555 1_555 1_555 1_555 yes
   Cl(1)   Ti(1)   C(2)    C(3)    154(1)   1_555 1_555 1_555 1_555 yes
   Cl(1)   Ti(1)   C(3)    C(2)    -26(1)   1_555 1_555 1_555 1_555 yes
   Cl(1)   Ti(1)   C(3)    C(4)    -146.4(9) 1_555 1_555 1_555 1_555 yes
   Cl(1)   Ti(1)   C(4)    C(3)    45(1)    1_555 1_555 1_555 1_555 yes
   Cl(1)   Ti(1)   C(4)    C(5)    -70(1)   1_555 1_555 1_555 1_555 yes
   Cl(1)   Ti(1)   C(5)    C(1)    15(1)    1_555 1_555 1_555 1_555 yes
   Cl(1)   Ti(1)   C(5)    C(4)    129.2(10) 1_555 1_555 1_555 1_555 yes
   Cl(2)   Ti(1)   C(1)    C(2)    171.4(10) 1_555 1_555 1_555 1_555 yes
   Cl(2)   Ti(1)   C(1)    C(5)    -74.0(9) 1_555 1_555 1_555 1_555 yes
   Cl(2)   Ti(1)   C(2)    C(1)    -9(1)    1_555 1_555 1_555 1_555 yes
   Cl(2)   Ti(1)   C(2)    C(3)    -120.8(10) 1_555 1_555 1_555 1_555 yes
   Cl(2)   Ti(1)   C(3)    C(2)    80(1)    1_555 1_555 1_555 1_555 yes
   Cl(2)   Ti(1)   C(3)    C(4)    -38(1)   1_555 1_555 1_555 1_555 yes
   Cl(2)   Ti(1)   C(4)    C(3)    150.4(9) 1_555 1_555 1_555 1_555 yes
   Cl(2)   Ti(1)   C(4)    C(5)    34.9(10) 1_555 1_555 1_555 1_555 yes
   Cl(2)   Ti(1)   C(5)    C(1)    101.0(10) 1_555 1_555 1_555 1_555 yes
   Cl(2)   Ti(1)   C(5)    C(4)    -145(1)  1_555 1_555 1_555 1_555 yes
   S(1)    Ru(1)   Ru(2)   S(2)    2.10(9)  1_555 1_555 1_555 1_555 yes
   S(1)    Ru(1)   Ru(2)   S(3)    -71.90(9) 1_555 1_555 1_555 1_555 yes
   S(1)    Ru(1)   Ru(2)   S(4)    97.45(9) 1_555 1_555 1_555 1_555 yes
   S(1)    Ru(1)   Ru(2)   C(21)   122.4(6) 1_555 1_555 1_555 1_555 yes
   S(1)    Ru(1)   Ru(2)   C(22)   153.2(3) 1_555 1_555 1_555 1_555 yes
   S(1)    Ru(1)   Ru(2)   C(23)   -167.1(3) 1_555 1_555 1_555 1_555 yes
   S(1)    Ru(1)   Ru(2)   C(24)   -128.4(3) 1_555 1_555 1_555 1_555 yes
   S(1)    Ru(1)   Ru(2)   C(25)   -97.2(8) 1_555 1_555 1_555 1_555 yes
   S(1)    Ru(1)   Ti(2)   S(2)    -89.8(1) 1_555 1_555 1_555 1_555 yes
   S(1)    Ru(1)   Ti(2)   S(4)    169.9(1) 1_555 1_555 1_555 1_555 yes
   S(1)    Ru(1)   Ti(2)   C(6)    123.1(5) 1_555 1_555 1_555 1_555 yes
   S(1)    Ru(1)   Ti(2)   C(7)    145.6(8) 1_555 1_555 1_555 1_555 yes
   S(1)    Ru(1)   Ti(2)   C(8)    39(1)    1_555 1_555 1_555 1_555 yes
   S(1)    Ru(1)   Ti(2)   C(9)    51.0(5)  1_555 1_555 1_555 1_555 yes
   S(1)    Ru(1)   Ti(2)   C(10)   86.4(5)  1_555 1_555 1_555 1_555 yes
   S(1)    Ru(1)   C(11)   C(12)   -132.6(5) 1_555 1_555 1_555 1_555 yes
   S(1)    Ru(1)   C(11)   C(15)   108.2(6) 1_555 1_555 1_555 1_555 yes
   S(1)    Ru(1)   C(11)   C(16)   -12.4(9) 1_555 1_555 1_555 1_555 yes
   S(1)    Ru(1)   C(12)   C(11)   53.6(6)  1_555 1_555 1_555 1_555 yes
   S(1)    Ru(1)   C(12)   C(13)   171.2(5) 1_555 1_555 1_555 1_555 yes
   S(1)    Ru(1)   C(12)   C(17)   -68.7(10) 1_555 1_555 1_555 1_555 yes
   S(1)    Ru(1)   C(13)   C(12)   -16.6(9) 1_555 1_555 1_555 1_555 yes
   S(1)    Ru(1)   C(13)   C(14)   99.5(7)  1_555 1_555 1_555 1_555 yes
   S(1)    Ru(1)   C(13)   C(18)   -138.3(8) 1_555 1_555 1_555 1_555 yes
   S(1)    Ru(1)   C(14)   C(13)   -133.9(5) 1_555 1_555 1_555 1_555 yes
   S(1)    Ru(1)   C(14)   C(15)   -16.7(7) 1_555 1_555 1_555 1_555 yes
   S(1)    Ru(1)   C(14)   C(19)   101.6(9) 1_555 1_555 1_555 1_555 yes
   S(1)    Ru(1)   C(15)   C(11)   -75.6(6) 1_555 1_555 1_555 1_555 yes
   S(1)    Ru(1)   C(15)   C(14)   168.7(5) 1_555 1_555 1_555 1_555 yes
   S(1)    Ru(1)   C(15)   C(20)   48.3(9)  1_555 1_555 1_555 1_555 yes
   S(1)    Ti(1)   C(1)    C(2)    -1(1)    1_555 1_555 1_555 1_555 yes
   S(1)    Ti(1)   C(1)    C(5)    113(1)   1_555 1_555 1_555 1_555 yes
   S(1)    Ti(1)   C(2)    C(1)    178.7(9) 1_555 1_555 1_555 1_555 yes
   S(1)    Ti(1)   C(2)    C(3)    67.7(10) 1_555 1_555 1_555 1_555 yes
   S(1)    Ti(1)   C(3)    C(2)    -108(1)  1_555 1_555 1_555 1_555 yes
   S(1)    Ti(1)   C(3)    C(4)    131(1)   1_555 1_555 1_555 1_555 yes
   S(1)    Ti(1)   C(4)    C(3)    -47.7(10) 1_555 1_555 1_555 1_555 yes
   S(1)    Ti(1)   C(4)    C(5)    -163.1(9) 1_555 1_555 1_555 1_555 yes
   S(1)    Ti(1)   C(5)    C(1)    -91(1)   1_555 1_555 1_555 1_555 yes
   S(1)    Ti(1)   C(5)    C(4)    21(1)    1_555 1_555 1_555 1_555 yes
   S(1)    Ti(2)   Ru(1)   S(3)    78.91(9) 1_555 1_555 1_555 1_555 yes
   S(1)    Ti(2)   Ru(1)   S(4)    -169.9(1) 1_555 1_555 1_555 1_555 yes
   S(1)    Ti(2)   Ru(1)   C(11)   -59.8(3) 1_555 1_555 1_555 1_555 yes
   S(1)    Ti(2)   Ru(1)   C(12)   -100.6(3) 1_555 1_555 1_555 1_555 yes
   S(1)    Ti(2)   Ru(1)   C(13)   -140.7(4) 1_555 1_555 1_555 1_555 yes
   S(1)    Ti(2)   Ru(1)   C(14)   -174(1)  1_555 1_555 1_555 1_555 yes
   S(1)    Ti(2)   Ru(1)   C(15)   -23.0(5) 1_555 1_555 1_555 1_555 yes
   S(1)    Ti(2)   Ru(2)   S(2)    90.1(1)  1_555 1_555 1_555 1_555 yes
   S(1)    Ti(2)   Ru(2)   S(3)    8.89(10) 1_555 1_555 1_555 1_555 yes
   S(1)    Ti(2)   Ru(2)   S(4)    -103.9(1) 1_555 1_555 1_555 1_555 yes
   S(1)    Ti(2)   Ru(2)   C(21)   165.2(3) 1_555 1_555 1_555 1_555 yes
   S(1)    Ti(2)   Ru(2)   C(22)   -153.8(3) 1_555 1_555 1_555 1_555 yes
   S(1)    Ti(2)   Ru(2)   C(23)   -120.5(6) 1_555 1_555 1_555 1_555 yes
   S(1)    Ti(2)   Ru(2)   C(24)   93.2(9)  1_555 1_555 1_555 1_555 yes
   S(1)    Ti(2)   Ru(2)   C(25)   124.2(3) 1_555 1_555 1_555 1_555 yes
   S(1)    Ti(2)   C(6)    C(7)    -127(1)  1_555 1_555 1_555 1_555 yes
   S(1)    Ti(2)   C(6)    C(10)   -12(1)   1_555 1_555 1_555 1_555 yes
   S(1)    Ti(2)   C(7)    C(6)    91(1)    1_555 1_555 1_555 1_555 yes
   S(1)    Ti(2)   C(7)    C(8)    -24(1)   1_555 1_555 1_555 1_555 yes
   S(1)    Ti(2)   C(8)    C(7)    165.0(9) 1_555 1_555 1_555 1_555 yes
   S(1)    Ti(2)   C(8)    C(9)    49.8(10) 1_555 1_555 1_555 1_555 yes
   S(1)    Ti(2)   C(9)    C(8)    -135.9(9) 1_555 1_555 1_555 1_555 yes
   S(1)    Ti(2)   C(9)    C(10)   109.2(9) 1_555 1_555 1_555 1_555 yes
   S(1)    Ti(2)   C(10)   C(6)    170(1)   1_555 1_555 1_555 1_555 yes
   S(1)    Ti(2)   C(10)   C(9)    -74.5(9) 1_555 1_555 1_555 1_555 yes
   S(2)    Ru(2)   Ru(1)   S(3)    74.00(9) 1_555 1_555 1_555 1_555 yes
   S(2)    Ru(2)   Ru(1)   S(4)    -95.36(9) 1_555 1_555 1_555 1_555 yes
   S(2)    Ru(2)   Ru(1)   C(11)   -164(1)  1_555 1_555 1_555 1_555 yes
   S(2)    Ru(2)   Ru(1)   C(12)   -135.3(3) 1_555 1_555 1_555 1_555 yes
   S(2)    Ru(2)   Ru(1)   C(13)   -168.1(3) 1_555 1_555 1_555 1_555 yes
   S(2)    Ru(2)   Ru(1)   C(14)   151.8(3) 1_555 1_555 1_555 1_555 yes
   S(2)    Ru(2)   Ru(1)   C(15)   120.2(4) 1_555 1_555 1_555 1_555 yes
   S(2)    Ru(2)   Ti(2)   S(4)    -166.0(1) 1_555 1_555 1_555 1_555 yes
   S(2)    Ru(2)   Ti(2)   C(6)    -117.8(6) 1_555 1_555 1_555 1_555 yes
   S(2)    Ru(2)   Ti(2)   C(7)    -79.2(6) 1_555 1_555 1_555 1_555 yes
   S(2)    Ru(2)   Ti(2)   C(8)    -44.9(5) 1_555 1_555 1_555 1_555 yes
   S(2)    Ru(2)   Ti(2)   C(9)    -41(2)   1_555 1_555 1_555 1_555 yes
   S(2)    Ru(2)   Ti(2)   C(10)   -148.4(7) 1_555 1_555 1_555 1_555 yes
   S(2)    Ru(2)   C(21)   C(22)   164.7(5) 1_555 1_555 1_555 1_555 yes
   S(2)    Ru(2)   C(21)   C(25)   -78.0(5) 1_555 1_555 1_555 1_555 yes
   S(2)    Ru(2)   C(21)   C(26)   42.4(10) 1_555 1_555 1_555 1_555 yes
   S(2)    Ru(2)   C(22)   C(21)   -20.3(6) 1_555 1_555 1_555 1_555 yes
   S(2)    Ru(2)   C(22)   C(23)   -137.3(5) 1_555 1_555 1_555 1_555 yes
   S(2)    Ru(2)   C(22)   C(27)   99.9(9)  1_555 1_555 1_555 1_555 yes
   S(2)    Ru(2)   C(23)   C(22)   82.9(7)  1_555 1_555 1_555 1_555 yes
   S(2)    Ru(2)   C(23)   C(24)   -34.9(8) 1_555 1_555 1_555 1_555 yes
   S(2)    Ru(2)   C(23)   C(28)   -155.7(8) 1_555 1_555 1_555 1_555 yes
   S(2)    Ru(2)   C(24)   C(23)   160.7(4) 1_555 1_555 1_555 1_555 yes
   S(2)    Ru(2)   C(24)   C(25)   42.5(6)  1_555 1_555 1_555 1_555 yes
   S(2)    Ru(2)   C(24)   C(29)   -78.3(10) 1_555 1_555 1_555 1_555 yes
   S(2)    Ru(2)   C(25)   C(21)   103.0(5) 1_555 1_555 1_555 1_555 yes
   S(2)    Ru(2)   C(25)   C(24)   -142.6(5) 1_555 1_555 1_555 1_555 yes
   S(2)    Ru(2)   C(25)   C(30)   -21.5(10) 1_555 1_555 1_555 1_555 yes
   S(2)    Ti(1)   C(1)    C(2)    -105(1)  1_555 1_555 1_555 1_555 yes
   S(2)    Ti(1)   C(1)    C(5)    9(1)     1_555 1_555 1_555 1_555 yes
   S(2)    Ti(1)   C(2)    C(1)    99(1)    1_555 1_555 1_555 1_555 yes
   S(2)    Ti(1)   C(2)    C(3)    -11(1)   1_555 1_555 1_555 1_555 yes
   S(2)    Ti(1)   C(3)    C(2)    170.5(9) 1_555 1_555 1_555 1_555 yes
   S(2)    Ti(1)   C(3)    C(4)    50.6(10) 1_555 1_555 1_555 1_555 yes
   S(2)    Ti(1)   C(4)    C(3)    -127(1)  1_555 1_555 1_555 1_555 yes
   S(2)    Ti(1)   C(4)    C(5)    117(1)   1_555 1_555 1_555 1_555 yes
   S(2)    Ti(1)   C(5)    C(1)    -172.5(9) 1_555 1_555 1_555 1_555 yes
   S(2)    Ti(1)   C(5)    C(4)    -59.0(9) 1_555 1_555 1_555 1_555 yes
   S(2)    Ti(2)   Ru(1)   S(3)    -10.88(9) 1_555 1_555 1_555 1_555 yes
   S(2)    Ti(2)   Ru(1)   S(4)    100.3(1) 1_555 1_555 1_555 1_555 yes
   S(2)    Ti(2)   Ru(1)   C(11)   -149.6(3) 1_555 1_555 1_555 1_555 yes
   S(2)    Ti(2)   Ru(1)   C(12)   169.6(3) 1_555 1_555 1_555 1_555 yes
   S(2)    Ti(2)   Ru(1)   C(13)   129.6(3) 1_555 1_555 1_555 1_555 yes
   S(2)    Ti(2)   Ru(1)   C(14)   95(1)    1_555 1_555 1_555 1_555 yes
   S(2)    Ti(2)   Ru(1)   C(15)   -112.8(5) 1_555 1_555 1_555 1_555 yes
   S(2)    Ti(2)   Ru(2)   S(3)    -81.22(10) 1_555 1_555 1_555 1_555 yes
   S(2)    Ti(2)   Ru(2)   S(4)    166.0(1) 1_555 1_555 1_555 1_555 yes
   S(2)    Ti(2)   Ru(2)   C(21)   75.0(3)  1_555 1_555 1_555 1_555 yes
   S(2)    Ti(2)   Ru(2)   C(22)   116.1(3) 1_555 1_555 1_555 1_555 yes
   S(2)    Ti(2)   Ru(2)   C(23)   149.4(6) 1_555 1_555 1_555 1_555 yes
   S(2)    Ti(2)   Ru(2)   C(24)   3.0(9)   1_555 1_555 1_555 1_555 yes
   S(2)    Ti(2)   Ru(2)   C(25)   34.1(3)  1_555 1_555 1_555 1_555 yes
   S(2)    Ti(2)   C(6)    C(7)    27(1)    1_555 1_555 1_555 1_555 yes
   S(2)    Ti(2)   C(6)    C(10)   143(1)   1_555 1_555 1_555 1_555 yes
   S(2)    Ti(2)   C(7)    C(6)    -158.9(10) 1_555 1_555 1_555 1_555 yes
   S(2)    Ti(2)   C(7)    C(8)    84.5(10) 1_555 1_555 1_555 1_555 yes
   S(2)    Ti(2)   C(8)    C(7)    -99(1)   1_555 1_555 1_555 1_555 yes
   S(2)    Ti(2)   C(8)    C(9)    145.1(9) 1_555 1_555 1_555 1_555 yes
   S(2)    Ti(2)   C(9)    C(8)    -41.9(10) 1_555 1_555 1_555 1_555 yes
   S(2)    Ti(2)   C(9)    C(10)   -156.8(9) 1_555 1_555 1_555 1_555 yes
   S(2)    Ti(2)   C(10)   C(6)    -71(1)   1_555 1_555 1_555 1_555 yes
   S(2)    Ti(2)   C(10)   C(9)    43(1)    1_555 1_555 1_555 1_555 yes
   S(3)    Ru(1)   Ru(2)   S(4)    169.36(10) 1_555 1_555 1_555 1_555 yes
   S(3)    Ru(1)   Ru(2)   C(21)   -165.7(6) 1_555 1_555 1_555 1_555 yes
   S(3)    Ru(1)   Ru(2)   C(22)   -134.9(3) 1_555 1_555 1_555 1_555 yes
   S(3)    Ru(1)   Ru(2)   C(23)   -95.2(3) 1_555 1_555 1_555 1_555 yes
   S(3)    Ru(1)   Ru(2)   C(24)   -56.5(3) 1_555 1_555 1_555 1_555 yes
   S(3)    Ru(1)   Ru(2)   C(25)   -25.3(8) 1_555 1_555 1_555 1_555 yes
   S(3)    Ru(1)   Ti(2)   S(4)    -111.2(1) 1_555 1_555 1_555 1_555 yes
   S(3)    Ru(1)   Ti(2)   C(6)    -158.0(5) 1_555 1_555 1_555 1_555 yes
   S(3)    Ru(1)   Ti(2)   C(7)    -135.5(8) 1_555 1_555 1_555 1_555 yes
   S(3)    Ru(1)   Ti(2)   C(8)    118(1)   1_555 1_555 1_555 1_555 yes
   S(3)    Ru(1)   Ti(2)   C(9)    129.9(5) 1_555 1_555 1_555 1_555 yes
   S(3)    Ru(1)   Ti(2)   C(10)   165.3(5) 1_555 1_555 1_555 1_555 yes
   S(3)    Ru(1)   C(11)   C(12)   150.1(5) 1_555 1_555 1_555 1_555 yes
   S(3)    Ru(1)   C(11)   C(15)   30.9(7)  1_555 1_555 1_555 1_555 yes
   S(3)    Ru(1)   C(11)   C(16)   -89.7(9) 1_555 1_555 1_555 1_555 yes
   S(3)    Ru(1)   C(12)   C(11)   -69.2(9) 1_555 1_555 1_555 1_555 yes
   S(3)    Ru(1)   C(12)   C(13)   48(1)    1_555 1_555 1_555 1_555 yes
   S(3)    Ru(1)   C(12)   C(17)   168.5(6) 1_555 1_555 1_555 1_555 yes
   S(3)    Ru(1)   C(13)   C(12)   -158.7(5) 1_555 1_555 1_555 1_555 yes
   S(3)    Ru(1)   C(13)   C(14)   -42.6(6) 1_555 1_555 1_555 1_555 yes
   S(3)    Ru(1)   C(13)   C(18)   79(1)    1_555 1_555 1_555 1_555 yes
   S(3)    Ru(1)   C(14)   C(13)   145.9(5) 1_555 1_555 1_555 1_555 yes
   S(3)    Ru(1)   C(14)   C(15)   -97.0(5) 1_555 1_555 1_555 1_555 yes
   S(3)    Ru(1)   C(14)   C(19)   21.4(10) 1_555 1_555 1_555 1_555 yes
   S(3)    Ru(1)   C(15)   C(11)   -157.0(5) 1_555 1_555 1_555 1_555 yes
   S(3)    Ru(1)   C(15)   C(14)   87.3(5)  1_555 1_555 1_555 1_555 yes
   S(3)    Ru(1)   C(15)   C(20)   -33.0(9) 1_555 1_555 1_555 1_555 yes
   S(3)    Ru(2)   Ru(1)   S(4)    -169.36(10) 1_555 1_555 1_555 1_555 yes
   S(3)    Ru(2)   Ru(1)   C(11)   121(1)   1_555 1_555 1_555 1_555 yes
   S(3)    Ru(2)   Ru(1)   C(12)   150.7(3) 1_555 1_555 1_555 1_555 yes
   S(3)    Ru(2)   Ru(1)   C(13)   117.9(3) 1_555 1_555 1_555 1_555 yes
   S(3)    Ru(2)   Ru(1)   C(14)   77.8(3)  1_555 1_555 1_555 1_555 yes
   S(3)    Ru(2)   Ru(1)   C(15)   46.2(4)  1_555 1_555 1_555 1_555 yes
   S(3)    Ru(2)   Ti(2)   S(4)    112.8(1) 1_555 1_555 1_555 1_555 yes
   S(3)    Ru(2)   Ti(2)   C(6)    161.0(6) 1_555 1_555 1_555 1_555 yes
   S(3)    Ru(2)   Ti(2)   C(7)    -160.4(6) 1_555 1_555 1_555 1_555 yes
   S(3)    Ru(2)   Ti(2)   C(8)    -126.1(5) 1_555 1_555 1_555 1_555 yes
   S(3)    Ru(2)   Ti(2)   C(9)    -122(2)  1_555 1_555 1_555 1_555 yes
   S(3)    Ru(2)   Ti(2)   C(10)   130.3(7) 1_555 1_555 1_555 1_555 yes
   S(3)    Ru(2)   C(21)   C(22)   -113.5(6) 1_555 1_555 1_555 1_555 yes
   S(3)    Ru(2)   C(21)   C(25)   3.9(8)   1_555 1_555 1_555 1_555 yes
   S(3)    Ru(2)   C(21)   C(26)   124.3(8) 1_555 1_555 1_555 1_555 yes
   S(3)    Ru(2)   C(22)   C(21)   125.8(5) 1_555 1_555 1_555 1_555 yes
   S(3)    Ru(2)   C(22)   C(23)   8.8(8)   1_555 1_555 1_555 1_555 yes
   S(3)    Ru(2)   C(22)   C(27)   -114.0(8) 1_555 1_555 1_555 1_555 yes
   S(3)    Ru(2)   C(23)   C(22)   -174.6(5) 1_555 1_555 1_555 1_555 yes
   S(3)    Ru(2)   C(23)   C(24)   67.7(5)  1_555 1_555 1_555 1_555 yes
   S(3)    Ru(2)   C(23)   C(28)   -53(1)   1_555 1_555 1_555 1_555 yes
   S(3)    Ru(2)   C(24)   C(23)   -118.3(5) 1_555 1_555 1_555 1_555 yes
   S(3)    Ru(2)   C(24)   C(25)   123.5(5) 1_555 1_555 1_555 1_555 yes
   S(3)    Ru(2)   C(24)   C(29)   2.7(9)   1_555 1_555 1_555 1_555 yes
   S(3)    Ru(2)   C(25)   C(21)   -177.8(5) 1_555 1_555 1_555 1_555 yes
   S(3)    Ru(2)   C(25)   C(24)   -63.4(5) 1_555 1_555 1_555 1_555 yes
   S(3)    Ru(2)   C(25)   C(30)   57(1)    1_555 1_555 1_555 1_555 yes
   S(3)    Ti(1)   C(1)    C(2)    121.9(8) 1_555 1_555 1_555 1_555 yes
   S(3)    Ti(1)   C(1)    C(5)    -123.6(8) 1_555 1_555 1_555 1_555 yes
   S(3)    Ti(1)   C(2)    C(1)    -132.8(7) 1_555 1_555 1_555 1_555 yes
   S(3)    Ti(1)   C(2)    C(3)    116.2(8) 1_555 1_555 1_555 1_555 yes
   S(3)    Ti(1)   C(3)    C(2)    -124.5(8) 1_555 1_555 1_555 1_555 yes
   S(3)    Ti(1)   C(3)    C(4)    115.6(9) 1_555 1_555 1_555 1_555 yes
   S(3)    Ti(1)   C(4)    C(3)    -118.2(8) 1_555 1_555 1_555 1_555 yes
   S(3)    Ti(1)   C(4)    C(5)    126.4(8) 1_555 1_555 1_555 1_555 yes
   S(3)    Ti(1)   C(5)    C(1)    132.7(7) 1_555 1_555 1_555 1_555 yes
   S(3)    Ti(1)   C(5)    C(4)    -113.7(8) 1_555 1_555 1_555 1_555 yes
   S(4)    Ru(1)   Ru(2)   C(21)   24.9(6)  1_555 1_555 1_555 1_555 yes
   S(4)    Ru(1)   Ru(2)   C(22)   55.7(3)  1_555 1_555 1_555 1_555 yes
   S(4)    Ru(1)   Ru(2)   C(23)   95.5(3)  1_555 1_555 1_555 1_555 yes
   S(4)    Ru(1)   Ru(2)   C(24)   134.1(3) 1_555 1_555 1_555 1_555 yes
   S(4)    Ru(1)   Ru(2)   C(25)   165.4(8) 1_555 1_555 1_555 1_555 yes
   S(4)    Ru(1)   Ti(2)   C(6)    -46.8(5) 1_555 1_555 1_555 1_555 yes
   S(4)    Ru(1)   Ti(2)   C(7)    -24.3(8) 1_555 1_555 1_555 1_555 yes
   S(4)    Ru(1)   Ti(2)   C(8)    -130(1)  1_555 1_555 1_555 1_555 yes
   S(4)    Ru(1)   Ti(2)   C(9)    -118.9(5) 1_555 1_555 1_555 1_555 yes
   S(4)    Ru(1)   Ti(2)   C(10)   -83.5(5) 1_555 1_555 1_555 1_555 yes
   S(4)    Ru(1)   C(11)   C(12)   -30.0(6) 1_555 1_555 1_555 1_555 yes
   S(4)    Ru(1)   C(11)   C(15)   -149.2(5) 1_555 1_555 1_555 1_555 yes
   S(4)    Ru(1)   C(11)   C(16)   90.2(9)  1_555 1_555 1_555 1_555 yes
   S(4)    Ru(1)   C(12)   C(11)   155.6(5) 1_555 1_555 1_555 1_555 yes
   S(4)    Ru(1)   C(12)   C(13)   -86.9(6) 1_555 1_555 1_555 1_555 yes
   S(4)    Ru(1)   C(12)   C(17)   33.2(9)  1_555 1_555 1_555 1_555 yes
   S(4)    Ru(1)   C(13)   C(12)   93.7(6)  1_555 1_555 1_555 1_555 yes
   S(4)    Ru(1)   C(13)   C(14)   -150.2(5) 1_555 1_555 1_555 1_555 yes
   S(4)    Ru(1)   C(13)   C(18)   -27.9(10) 1_555 1_555 1_555 1_555 yes
   S(4)    Ru(1)   C(14)   C(13)   35.6(6)  1_555 1_555 1_555 1_555 yes
   S(4)    Ru(1)   C(14)   C(15)   152.8(5) 1_555 1_555 1_555 1_555 yes
   S(4)    Ru(1)   C(14)   C(19)   -88.9(10) 1_555 1_555 1_555 1_555 yes
   S(4)    Ru(1)   C(15)   C(11)   61.4(8)  1_555 1_555 1_555 1_555 yes
   S(4)    Ru(1)   C(15)   C(14)   -54.3(9) 1_555 1_555 1_555 1_555 yes
   S(4)    Ru(1)   C(15)   C(20)   -174.6(6) 1_555 1_555 1_555 1_555 yes
   S(4)    Ru(2)   Ru(1)   C(11)   -68(1)   1_555 1_555 1_555 1_555 yes
   S(4)    Ru(2)   Ru(1)   C(12)   -39.9(3) 1_555 1_555 1_555 1_555 yes
   S(4)    Ru(2)   Ru(1)   C(13)   -72.7(3) 1_555 1_555 1_555 1_555 yes
   S(4)    Ru(2)   Ru(1)   C(14)   -112.9(3) 1_555 1_555 1_555 1_555 yes
   S(4)    Ru(2)   Ru(1)   C(15)   -144.4(4) 1_555 1_555 1_555 1_555 yes
   S(4)    Ru(2)   Ti(2)   C(6)    48.2(6)  1_555 1_555 1_555 1_555 yes
   S(4)    Ru(2)   Ti(2)   C(7)    86.8(6)  1_555 1_555 1_555 1_555 yes
   S(4)    Ru(2)   Ti(2)   C(8)    121.1(5) 1_555 1_555 1_555 1_555 yes
   S(4)    Ru(2)   Ti(2)   C(9)    124(2)   1_555 1_555 1_555 1_555 yes
   S(4)    Ru(2)   Ti(2)   C(10)   17.5(7)  1_555 1_555 1_555 1_555 yes
   S(4)    Ru(2)   C(21)   C(22)   64.8(5)  1_555 1_555 1_555 1_555 yes
   S(4)    Ru(2)   C(21)   C(25)   -177.9(5) 1_555 1_555 1_555 1_555 yes
   S(4)    Ru(2)   C(21)   C(26)   -57.4(10) 1_555 1_555 1_555 1_555 yes
   S(4)    Ru(2)   C(22)   C(21)   -119.9(5) 1_555 1_555 1_555 1_555 yes
   S(4)    Ru(2)   C(22)   C(23)   123.1(5) 1_555 1_555 1_555 1_555 yes
   S(4)    Ru(2)   C(22)   C(27)   0.3(9)   1_555 1_555 1_555 1_555 yes
   S(4)    Ru(2)   C(23)   C(22)   -61.9(6) 1_555 1_555 1_555 1_555 yes
   S(4)    Ru(2)   C(23)   C(24)   -179.7(5) 1_555 1_555 1_555 1_555 yes
   S(4)    Ru(2)   C(23)   C(28)   59(1)    1_555 1_555 1_555 1_555 yes
   S(4)    Ru(2)   C(24)   C(23)   0.5(7)   1_555 1_555 1_555 1_555 yes
   S(4)    Ru(2)   C(24)   C(25)   -117.7(6) 1_555 1_555 1_555 1_555 yes
   S(4)    Ru(2)   C(24)   C(29)   121.5(9) 1_555 1_555 1_555 1_555 yes
   S(4)    Ru(2)   C(25)   C(21)   3.5(8)   1_555 1_555 1_555 1_555 yes
   S(4)    Ru(2)   C(25)   C(24)   117.9(5) 1_555 1_555 1_555 1_555 yes
   S(4)    Ru(2)   C(25)   C(30)   -120.9(9) 1_555 1_555 1_555 1_555 yes
   S(4)    Ti(2)   Ru(1)   C(11)   110.1(3) 1_555 1_555 1_555 1_555 yes
   S(4)    Ti(2)   Ru(1)   C(12)   69.3(3)  1_555 1_555 1_555 1_555 yes
   S(4)    Ti(2)   Ru(1)   C(13)   29.2(4)  1_555 1_555 1_555 1_555 yes
   S(4)    Ti(2)   Ru(1)   C(14)   -4(1)    1_555 1_555 1_555 1_555 yes
   S(4)    Ti(2)   Ru(1)   C(15)   146.9(5) 1_555 1_555 1_555 1_555 yes
   S(4)    Ti(2)   Ru(2)   C(21)   -90.9(3) 1_555 1_555 1_555 1_555 yes
   S(4)    Ti(2)   Ru(2)   C(22)   -49.9(3) 1_555 1_555 1_555 1_555 yes
   S(4)    Ti(2)   Ru(2)   C(23)   -16.6(6) 1_555 1_555 1_555 1_555 yes
   S(4)    Ti(2)   Ru(2)   C(24)   -162.9(9) 1_555 1_555 1_555 1_555 yes
   S(4)    Ti(2)   Ru(2)   C(25)   -131.9(3) 1_555 1_555 1_555 1_555 yes
   S(4)    Ti(2)   C(6)    C(7)    127(1)   1_555 1_555 1_555 1_555 yes
   S(4)    Ti(2)   C(6)    C(10)   -116(1)  1_555 1_555 1_555 1_555 yes
   S(4)    Ti(2)   C(7)    C(6)    -54(1)   1_555 1_555 1_555 1_555 yes
   S(4)    Ti(2)   C(7)    C(8)    -171.1(9) 1_555 1_555 1_555 1_555 yes
   S(4)    Ti(2)   C(8)    C(7)    12(1)    1_555 1_555 1_555 1_555 yes
   S(4)    Ti(2)   C(8)    C(9)    -102(1)  1_555 1_555 1_555 1_555 yes
   S(4)    Ti(2)   C(9)    C(8)    113(1)   1_555 1_555 1_555 1_555 yes
   S(4)    Ti(2)   C(9)    C(10)   0(1)     1_555 1_555 1_555 1_555 yes
   S(4)    Ti(2)   C(10)   C(6)    64(1)    1_555 1_555 1_555 1_555 yes
   S(4)    Ti(2)   C(10)   C(9)    179.3(9) 1_555 1_555 1_555 1_555 yes
   C(1)    Ti(1)   C(2)    C(3)    -110(1)  1_555 1_555 1_555 1_555 yes
   C(1)    Ti(1)   C(3)    C(2)    40.1(8)  1_555 1_555 1_555 1_555 yes
   C(1)    Ti(1)   C(3)    C(4)    -79.8(10) 1_555 1_555 1_555 1_555 yes
   C(1)    Ti(1)   C(4)    C(3)    76.7(9)  1_555 1_555 1_555 1_555 yes
   C(1)    Ti(1)   C(4)    C(5)    -38.8(8) 1_555 1_555 1_555 1_555 yes
   C(1)    Ti(1)   C(5)    C(4)    113(1)   1_555 1_555 1_555 1_555 yes
   C(1)    C(2)    Ti(1)   C(3)    110(1)   1_555 1_555 1_555 1_555 yes
   C(1)    C(2)    Ti(1)   C(4)    77.5(8)  1_555 1_555 1_555 1_555 yes
   C(1)    C(2)    Ti(1)   C(5)    37.7(8)  1_555 1_555 1_555 1_555 yes
   C(1)    C(2)    C(3)    C(4)    0(1)     1_555 1_555 1_555 1_555 yes
   C(1)    C(5)    Ti(1)   C(2)    -37.6(7) 1_555 1_555 1_555 1_555 yes
   C(1)    C(5)    Ti(1)   C(3)    -77.7(8) 1_555 1_555 1_555 1_555 yes
   C(1)    C(5)    Ti(1)   C(4)    -113(1)  1_555 1_555 1_555 1_555 yes
   C(1)    C(5)    C(4)    C(3)    0(1)     1_555 1_555 1_555 1_555 yes
   C(2)    Ti(1)   C(1)    C(5)    114(1)   1_555 1_555 1_555 1_555 yes
   C(2)    Ti(1)   C(3)    C(4)    -119(1)  1_555 1_555 1_555 1_555 yes
   C(2)    Ti(1)   C(4)    C(3)    34.9(9)  1_555 1_555 1_555 1_555 yes
   C(2)    Ti(1)   C(4)    C(5)    -80.5(9) 1_555 1_555 1_555 1_555 yes
   C(2)    Ti(1)   C(5)    C(4)    76.0(8)  1_555 1_555 1_555 1_555 yes
   C(2)    C(1)    Ti(1)   C(3)    -38.6(7) 1_555 1_555 1_555 1_555 yes
   C(2)    C(1)    Ti(1)   C(4)    -77.4(8) 1_555 1_555 1_555 1_555 yes
   C(2)    C(1)    Ti(1)   C(5)    -114(1)  1_555 1_555 1_555 1_555 yes
   C(2)    C(1)    C(5)    C(4)    0(1)     1_555 1_555 1_555 1_555 yes
   C(2)    C(3)    Ti(1)   C(4)    119(1)   1_555 1_555 1_555 1_555 yes
   C(2)    C(3)    Ti(1)   C(5)    82.6(9)  1_555 1_555 1_555 1_555 yes
   C(2)    C(3)    C(4)    C(5)    0(1)     1_555 1_555 1_555 1_555 yes
   C(3)    Ti(1)   C(1)    C(5)    76.0(8)  1_555 1_555 1_555 1_555 yes
   C(3)    Ti(1)   C(4)    C(5)    -115(1)  1_555 1_555 1_555 1_555 yes
   C(3)    Ti(1)   C(5)    C(4)    35.9(8)  1_555 1_555 1_555 1_555 yes
   C(3)    C(2)    Ti(1)   C(4)    -33.5(8) 1_555 1_555 1_555 1_555 yes
   C(3)    C(2)    Ti(1)   C(5)    -73.3(9) 1_555 1_555 1_555 1_555 yes
   C(3)    C(2)    C(1)    C(5)    0(1)     1_555 1_555 1_555 1_555 yes
   C(3)    C(4)    Ti(1)   C(5)    115(1)   1_555 1_555 1_555 1_555 yes
   C(4)    Ti(1)   C(1)    C(5)    37.2(7)  1_555 1_555 1_555 1_555 yes
   C(4)    C(3)    Ti(1)   C(5)    -37.3(9) 1_555 1_555 1_555 1_555 yes
   C(6)    Ti(2)   Ru(1)   C(11)   63.3(6)  1_555 1_555 1_555 1_555 yes
   C(6)    Ti(2)   Ru(1)   C(12)   22.5(6)  1_555 1_555 1_555 1_555 yes
   C(6)    Ti(2)   Ru(1)   C(13)   -17.5(6) 1_555 1_555 1_555 1_555 yes
   C(6)    Ti(2)   Ru(1)   C(14)   -51(1)   1_555 1_555 1_555 1_555 yes
   C(6)    Ti(2)   Ru(1)   C(15)   100.1(8) 1_555 1_555 1_555 1_555 yes
   C(6)    Ti(2)   Ru(2)   C(21)   -42.8(7) 1_555 1_555 1_555 1_555 yes
   C(6)    Ti(2)   Ru(2)   C(22)   -1.7(7)  1_555 1_555 1_555 1_555 yes
   C(6)    Ti(2)   Ru(2)   C(23)   31.6(8)  1_555 1_555 1_555 1_555 yes
   C(6)    Ti(2)   Ru(2)   C(24)   -114(1)  1_555 1_555 1_555 1_555 yes
   C(6)    Ti(2)   Ru(2)   C(25)   -83.7(7) 1_555 1_555 1_555 1_555 yes
   C(6)    Ti(2)   C(7)    C(8)    -116(1)  1_555 1_555 1_555 1_555 yes
   C(6)    Ti(2)   C(8)    C(7)    36.6(9)  1_555 1_555 1_555 1_555 yes
   C(6)    Ti(2)   C(8)    C(9)    -78.6(8) 1_555 1_555 1_555 1_555 yes
   C(6)    Ti(2)   C(9)    C(8)    77.6(8)  1_555 1_555 1_555 1_555 yes
   C(6)    Ti(2)   C(9)    C(10)   -37.3(8) 1_555 1_555 1_555 1_555 yes
   C(6)    Ti(2)   C(10)   C(9)    114(1)   1_555 1_555 1_555 1_555 yes
   C(6)    C(7)    Ti(2)   C(8)    116(1)   1_555 1_555 1_555 1_555 yes
   C(6)    C(7)    Ti(2)   C(9)    79.0(9)  1_555 1_555 1_555 1_555 yes
   C(6)    C(7)    Ti(2)   C(10)   37.2(9)  1_555 1_555 1_555 1_555 yes
   C(6)    C(7)    C(8)    C(9)    -1(1)    1_555 1_555 1_555 1_555 yes
   C(6)    C(10)   Ti(2)   C(7)    -37.1(9) 1_555 1_555 1_555 1_555 yes
   C(6)    C(10)   Ti(2)   C(8)    -77.3(9) 1_555 1_555 1_555 1_555 yes
   C(6)    C(10)   Ti(2)   C(9)    -114(1)  1_555 1_555 1_555 1_555 yes
   C(6)    C(10)   C(9)    C(8)    0(1)     1_555 1_555 1_555 1_555 yes
   C(7)    Ti(2)   Ru(1)   C(11)   85.8(8)  1_555 1_555 1_555 1_555 yes
   C(7)    Ti(2)   Ru(1)   C(12)   45.0(8)  1_555 1_555 1_555 1_555 yes
   C(7)    Ti(2)   Ru(1)   C(13)   4.9(8)   1_555 1_555 1_555 1_555 yes
   C(7)    Ti(2)   Ru(1)   C(14)   -29(1)   1_555 1_555 1_555 1_555 yes
   C(7)    Ti(2)   Ru(1)   C(15)   122.6(9) 1_555 1_555 1_555 1_555 yes
   C(7)    Ti(2)   Ru(2)   C(21)   -4.2(7)  1_555 1_555 1_555 1_555 yes
   C(7)    Ti(2)   Ru(2)   C(22)   36.9(7)  1_555 1_555 1_555 1_555 yes
   C(7)    Ti(2)   Ru(2)   C(23)   70.2(8)  1_555 1_555 1_555 1_555 yes
   C(7)    Ti(2)   Ru(2)   C(24)   -76(1)   1_555 1_555 1_555 1_555 yes
   C(7)    Ti(2)   Ru(2)   C(25)   -45.2(7) 1_555 1_555 1_555 1_555 yes
   C(7)    Ti(2)   C(6)    C(10)   115(1)   1_555 1_555 1_555 1_555 yes
   C(7)    Ti(2)   C(8)    C(9)    -115(1)  1_555 1_555 1_555 1_555 yes
   C(7)    Ti(2)   C(9)    C(8)    36.8(8)  1_555 1_555 1_555 1_555 yes
   C(7)    Ti(2)   C(9)    C(10)   -78.0(9) 1_555 1_555 1_555 1_555 yes
   C(7)    Ti(2)   C(10)   C(9)    77.6(8)  1_555 1_555 1_555 1_555 yes
   C(7)    C(6)    Ti(2)   C(8)    -36.2(8) 1_555 1_555 1_555 1_555 yes
   C(7)    C(6)    Ti(2)   C(9)    -77.3(9) 1_555 1_555 1_555 1_555 yes
   C(7)    C(6)    Ti(2)   C(10)   -115(1)  1_555 1_555 1_555 1_555 yes
   C(7)    C(6)    C(10)   C(9)    -1(1)    1_555 1_555 1_555 1_555 yes
   C(7)    C(8)    Ti(2)   C(9)    115(1)   1_555 1_555 1_555 1_555 yes
   C(7)    C(8)    Ti(2)   C(10)   77.4(9)  1_555 1_555 1_555 1_555 yes
   C(7)    C(8)    C(9)    C(10)   0(1)     1_555 1_555 1_555 1_555 yes
   C(8)    Ti(2)   Ru(1)   C(11)   -20(1)   1_555 1_555 1_555 1_555 yes
   C(8)    Ti(2)   Ru(1)   C(12)   -61(1)   1_555 1_555 1_555 1_555 yes
   C(8)    Ti(2)   Ru(1)   C(13)   -101(1)  1_555 1_555 1_555 1_555 yes
   C(8)    Ti(2)   Ru(1)   C(14)   -135(2)  1_555 1_555 1_555 1_555 yes
   C(8)    Ti(2)   Ru(1)   C(15)   16(1)    1_555 1_555 1_555 1_555 yes
   C(8)    Ti(2)   Ru(2)   C(21)   30.2(6)  1_555 1_555 1_555 1_555 yes
   C(8)    Ti(2)   Ru(2)   C(22)   71.2(6)  1_555 1_555 1_555 1_555 yes
   C(8)    Ti(2)   Ru(2)   C(23)   104.5(8) 1_555 1_555 1_555 1_555 yes
   C(8)    Ti(2)   Ru(2)   C(24)   -41(1)   1_555 1_555 1_555 1_555 yes
   C(8)    Ti(2)   Ru(2)   C(25)   -10.8(6) 1_555 1_555 1_555 1_555 yes
   C(8)    Ti(2)   C(6)    C(10)   79.2(9)  1_555 1_555 1_555 1_555 yes
   C(8)    Ti(2)   C(9)    C(10)   -114(1)  1_555 1_555 1_555 1_555 yes
   C(8)    Ti(2)   C(10)   C(9)    37.4(7)  1_555 1_555 1_555 1_555 yes
   C(8)    C(7)    Ti(2)   C(9)    -37.6(8) 1_555 1_555 1_555 1_555 yes
   C(8)    C(7)    Ti(2)   C(10)   -79.4(8) 1_555 1_555 1_555 1_555 yes
   C(8)    C(7)    C(6)    C(10)   1(1)     1_555 1_555 1_555 1_555 yes
   C(8)    C(9)    Ti(2)   C(10)   114(1)   1_555 1_555 1_555 1_555 yes
   C(9)    Ti(2)   Ru(1)   C(11)   -8.8(6)  1_555 1_555 1_555 1_555 yes
   C(9)    Ti(2)   Ru(1)   C(12)   -49.6(6) 1_555 1_555 1_555 1_555 yes
   C(9)    Ti(2)   Ru(1)   C(13)   -89.7(6) 1_555 1_555 1_555 1_555 yes
   C(9)    Ti(2)   Ru(1)   C(14)   -123(1)  1_555 1_555 1_555 1_555 yes
   C(9)    Ti(2)   Ru(1)   C(15)   27.9(7)  1_555 1_555 1_555 1_555 yes
   C(9)    Ti(2)   Ru(2)   C(21)   33(2)    1_555 1_555 1_555 1_555 yes
   C(9)    Ti(2)   Ru(2)   C(22)   74(2)    1_555 1_555 1_555 1_555 yes
   C(9)    Ti(2)   Ru(2)   C(23)   108(2)   1_555 1_555 1_555 1_555 yes
   C(9)    Ti(2)   Ru(2)   C(24)   -38(2)   1_555 1_555 1_555 1_555 yes
   C(9)    Ti(2)   Ru(2)   C(25)   -7(2)    1_555 1_555 1_555 1_555 yes
   C(9)    Ti(2)   C(6)    C(10)   38.0(8)  1_555 1_555 1_555 1_555 yes
   C(9)    C(8)    Ti(2)   C(10)   -37.8(7) 1_555 1_555 1_555 1_555 yes
   C(10)   Ti(2)   Ru(1)   C(11)   26.6(6)  1_555 1_555 1_555 1_555 yes
   C(10)   Ti(2)   Ru(1)   C(12)   -14.2(6) 1_555 1_555 1_555 1_555 yes
   C(10)   Ti(2)   Ru(1)   C(13)   -54.2(6) 1_555 1_555 1_555 1_555 yes
   C(10)   Ti(2)   Ru(1)   C(14)   -88(1)   1_555 1_555 1_555 1_555 yes
   C(10)   Ti(2)   Ru(1)   C(15)   63.4(7)  1_555 1_555 1_555 1_555 yes
   C(10)   Ti(2)   Ru(2)   C(21)   -73.4(7) 1_555 1_555 1_555 1_555 yes
   C(10)   Ti(2)   Ru(2)   C(22)   -32.4(7) 1_555 1_555 1_555 1_555 yes
   C(10)   Ti(2)   Ru(2)   C(23)   1.0(9)   1_555 1_555 1_555 1_555 yes
   C(10)   Ti(2)   Ru(2)   C(24)   -145(1)  1_555 1_555 1_555 1_555 yes
   C(10)   Ti(2)   Ru(2)   C(25)   -114.4(7) 1_555 1_555 1_555 1_555 yes
   C(11)   Ru(1)   Ru(2)   C(21)   -43(1)   1_555 1_555 1_555 1_555 yes
   C(11)   Ru(1)   Ru(2)   C(22)   -13(1)   1_555 1_555 1_555 1_555 yes
   C(11)   Ru(1)   Ru(2)   C(23)   26(1)    1_555 1_555 1_555 1_555 yes
   C(11)   Ru(1)   Ru(2)   C(24)   65(1)    1_555 1_555 1_555 1_555 yes
   C(11)   Ru(1)   Ru(2)   C(25)   96(1)    1_555 1_555 1_555 1_555 yes
   C(11)   Ru(1)   C(12)   C(13)   117.6(8) 1_555 1_555 1_555 1_555 yes
   C(11)   Ru(1)   C(12)   C(17)   -122(1)  1_555 1_555 1_555 1_555 yes
   C(11)   Ru(1)   C(13)   C(12)   -36.3(5) 1_555 1_555 1_555 1_555 yes
   C(11)   Ru(1)   C(13)   C(14)   79.8(6)  1_555 1_555 1_555 1_555 yes
   C(11)   Ru(1)   C(13)   C(18)   -157(1)  1_555 1_555 1_555 1_555 yes
   C(11)   Ru(1)   C(14)   C(13)   -79.3(6) 1_555 1_555 1_555 1_555 yes
   C(11)   Ru(1)   C(14)   C(15)   37.8(5)  1_555 1_555 1_555 1_555 yes
   C(11)   Ru(1)   C(14)   C(19)   156(1)   1_555 1_555 1_555 1_555 yes
   C(11)   Ru(1)   C(15)   C(14)   -115.7(8) 1_555 1_555 1_555 1_555 yes
   C(11)   Ru(1)   C(15)   C(20)   123(1)   1_555 1_555 1_555 1_555 yes
   C(11)   C(12)   Ru(1)   C(13)   -117.6(8) 1_555 1_555 1_555 1_555 yes
   C(11)   C(12)   Ru(1)   C(14)   -79.6(6) 1_555 1_555 1_555 1_555 yes
   C(11)   C(12)   Ru(1)   C(15)   -36.5(5) 1_555 1_555 1_555 1_555 yes
   C(11)   C(12)   C(13)   C(14)   -1(1)    1_555 1_555 1_555 1_555 yes
   C(11)   C(12)   C(13)   C(18)   -174.3(9) 1_555 1_555 1_555 1_555 yes
   C(11)   C(15)   Ru(1)   C(12)   35.7(5)  1_555 1_555 1_555 1_555 yes
   C(11)   C(15)   Ru(1)   C(13)   78.4(6)  1_555 1_555 1_555 1_555 yes
   C(11)   C(15)   Ru(1)   C(14)   115.7(8) 1_555 1_555 1_555 1_555 yes
   C(11)   C(15)   C(14)   C(13)   -3(1)    1_555 1_555 1_555 1_555 yes
   C(11)   C(15)   C(14)   C(19)   173.6(9) 1_555 1_555 1_555 1_555 yes
   C(12)   Ru(1)   Ru(2)   C(21)   -15.0(7) 1_555 1_555 1_555 1_555 yes
   C(12)   Ru(1)   Ru(2)   C(22)   15.8(4)  1_555 1_555 1_555 1_555 yes
   C(12)   Ru(1)   Ru(2)   C(23)   55.5(4)  1_555 1_555 1_555 1_555 yes
   C(12)   Ru(1)   Ru(2)   C(24)   94.2(5)  1_555 1_555 1_555 1_555 yes
   C(12)   Ru(1)   Ru(2)   C(25)   125.4(9) 1_555 1_555 1_555 1_555 yes
   C(12)   Ru(1)   C(11)   C(15)   -119.2(8) 1_555 1_555 1_555 1_555 yes
   C(12)   Ru(1)   C(11)   C(16)   120(1)   1_555 1_555 1_555 1_555 yes
   C(12)   Ru(1)   C(13)   C(14)   116.1(8) 1_555 1_555 1_555 1_555 yes
   C(12)   Ru(1)   C(13)   C(18)   -121(1)  1_555 1_555 1_555 1_555 yes
   C(12)   Ru(1)   C(14)   C(13)   -38.3(5) 1_555 1_555 1_555 1_555 yes
   C(12)   Ru(1)   C(14)   C(15)   78.8(6)  1_555 1_555 1_555 1_555 yes
   C(12)   Ru(1)   C(14)   C(19)   -162(1)  1_555 1_555 1_555 1_555 yes
   C(12)   Ru(1)   C(15)   C(14)   -80.0(6) 1_555 1_555 1_555 1_555 yes
   C(12)   Ru(1)   C(15)   C(20)   159(1)   1_555 1_555 1_555 1_555 yes
   C(12)   C(11)   Ru(1)   C(13)   37.9(5)  1_555 1_555 1_555 1_555 yes
   C(12)   C(11)   Ru(1)   C(14)   80.4(6)  1_555 1_555 1_555 1_555 yes
   C(12)   C(11)   Ru(1)   C(15)   119.2(8) 1_555 1_555 1_555 1_555 yes
   C(12)   C(11)   C(15)   C(14)   2(1)     1_555 1_555 1_555 1_555 yes
   C(12)   C(11)   C(15)   C(20)   172.9(9) 1_555 1_555 1_555 1_555 yes
   C(12)   C(13)   Ru(1)   C(14)   -116.1(8) 1_555 1_555 1_555 1_555 yes
   C(12)   C(13)   Ru(1)   C(15)   -78.2(6) 1_555 1_555 1_555 1_555 yes
   C(12)   C(13)   C(14)   C(15)   3(1)     1_555 1_555 1_555 1_555 yes
   C(12)   C(13)   C(14)   C(19)   -173.6(9) 1_555 1_555 1_555 1_555 yes
   C(13)   Ru(1)   Ru(2)   C(21)   -47.8(6) 1_555 1_555 1_555 1_555 yes
   C(13)   Ru(1)   Ru(2)   C(22)   -17.0(4) 1_555 1_555 1_555 1_555 yes
   C(13)   Ru(1)   Ru(2)   C(23)   22.7(4)  1_555 1_555 1_555 1_555 yes
   C(13)   Ru(1)   Ru(2)   C(24)   61.4(4)  1_555 1_555 1_555 1_555 yes
   C(13)   Ru(1)   Ru(2)   C(25)   92.6(8)  1_555 1_555 1_555 1_555 yes
   C(13)   Ru(1)   C(11)   C(15)   -81.3(6) 1_555 1_555 1_555 1_555 yes
   C(13)   Ru(1)   C(11)   C(16)   158(1)   1_555 1_555 1_555 1_555 yes
   C(13)   Ru(1)   C(12)   C(17)   120(1)   1_555 1_555 1_555 1_555 yes
   C(13)   Ru(1)   C(14)   C(15)   117.1(8) 1_555 1_555 1_555 1_555 yes
   C(13)   Ru(1)   C(14)   C(19)   -124(1)  1_555 1_555 1_555 1_555 yes
   C(13)   Ru(1)   C(15)   C(14)   -37.3(5) 1_555 1_555 1_555 1_555 yes
   C(13)   Ru(1)   C(15)   C(20)   -157(1)  1_555 1_555 1_555 1_555 yes
   C(13)   C(12)   Ru(1)   C(14)   37.9(5)  1_555 1_555 1_555 1_555 yes
   C(13)   C(12)   Ru(1)   C(15)   81.1(6)  1_555 1_555 1_555 1_555 yes
   C(13)   C(12)   C(11)   C(15)   0(1)     1_555 1_555 1_555 1_555 yes
   C(13)   C(12)   C(11)   C(16)   175.7(8) 1_555 1_555 1_555 1_555 yes
   C(13)   C(14)   Ru(1)   C(15)   -117.1(8) 1_555 1_555 1_555 1_555 yes
   C(13)   C(14)   C(15)   C(20)   -174.2(9) 1_555 1_555 1_555 1_555 yes
   C(14)   Ru(1)   Ru(2)   C(21)   -87.9(7) 1_555 1_555 1_555 1_555 yes
   C(14)   Ru(1)   Ru(2)   C(22)   -57.1(4) 1_555 1_555 1_555 1_555 yes
   C(14)   Ru(1)   Ru(2)   C(23)   -17.4(4) 1_555 1_555 1_555 1_555 yes
   C(14)   Ru(1)   Ru(2)   C(24)   21.2(4)  1_555 1_555 1_555 1_555 yes
   C(14)   Ru(1)   Ru(2)   C(25)   52.5(9)  1_555 1_555 1_555 1_555 yes
   C(14)   Ru(1)   C(11)   C(15)   -38.8(6) 1_555 1_555 1_555 1_555 yes
   C(14)   Ru(1)   C(11)   C(16)   -159(1)  1_555 1_555 1_555 1_555 yes
   C(14)   Ru(1)   C(12)   C(17)   158(1)   1_555 1_555 1_555 1_555 yes
   C(14)   Ru(1)   C(13)   C(18)   122(1)   1_555 1_555 1_555 1_555 yes
   C(14)   Ru(1)   C(15)   C(20)   -120(1)  1_555 1_555 1_555 1_555 yes
   C(14)   C(13)   Ru(1)   C(15)   37.9(5)  1_555 1_555 1_555 1_555 yes
   C(14)   C(13)   C(12)   C(17)   173.7(9) 1_555 1_555 1_555 1_555 yes
   C(14)   C(15)   C(11)   C(16)   -173.7(9) 1_555 1_555 1_555 1_555 yes
   C(15)   Ru(1)   Ru(2)   C(21)   -119.5(7) 1_555 1_555 1_555 1_555 yes
   C(15)   Ru(1)   Ru(2)   C(22)   -88.7(5) 1_555 1_555 1_555 1_555 yes
   C(15)   Ru(1)   Ru(2)   C(23)   -49.0(5) 1_555 1_555 1_555 1_555 yes
   C(15)   Ru(1)   Ru(2)   C(24)   -10.3(5) 1_555 1_555 1_555 1_555 yes
   C(15)   Ru(1)   Ru(2)   C(25)   20.9(9)  1_555 1_555 1_555 1_555 yes
   C(15)   Ru(1)   C(11)   C(16)   -120(1)  1_555 1_555 1_555 1_555 yes
   C(15)   Ru(1)   C(12)   C(17)   -158(1)  1_555 1_555 1_555 1_555 yes
   C(15)   Ru(1)   C(13)   C(18)   160(1)   1_555 1_555 1_555 1_555 yes
   C(15)   Ru(1)   C(14)   C(19)   118(1)   1_555 1_555 1_555 1_555 yes
   C(15)   C(11)   C(12)   C(17)   -175.7(9) 1_555 1_555 1_555 1_555 yes
   C(15)   C(14)   C(13)   C(18)   175.6(9) 1_555 1_555 1_555 1_555 yes
   C(16)   C(11)   C(12)   C(17)   0(1)     1_555 1_555 1_555 1_555 yes
   C(16)   C(11)   C(15)   C(20)   -3(1)    1_555 1_555 1_555 1_555 yes
   C(17)   C(12)   C(13)   C(18)   1(1)     1_555 1_555 1_555 1_555 yes
   C(18)   C(13)   C(14)   C(19)   -1(1)    1_555 1_555 1_555 1_555 yes
   C(19)   C(14)   C(15)   C(20)   2(1)     1_555 1_555 1_555 1_555 yes
   C(21)   Ru(2)   C(22)   C(23)   -117.0(8) 1_555 1_555 1_555 1_555 yes
   C(21)   Ru(2)   C(22)   C(27)   120(1)   1_555 1_555 1_555 1_555 yes
   C(21)   Ru(2)   C(23)   C(22)   37.5(5)  1_555 1_555 1_555 1_555 yes
   C(21)   Ru(2)   C(23)   C(24)   -80.3(6) 1_555 1_555 1_555 1_555 yes
   C(21)   Ru(2)   C(23)   C(28)   158(1)   1_555 1_555 1_555 1_555 yes
   C(21)   Ru(2)   C(24)   C(23)   79.1(6)  1_555 1_555 1_555 1_555 yes
   C(21)   Ru(2)   C(24)   C(25)   -39.1(5) 1_555 1_555 1_555 1_555 yes
   C(21)   Ru(2)   C(24)   C(29)   -159(1)  1_555 1_555 1_555 1_555 yes
   C(21)   Ru(2)   C(25)   C(24)   114.4(8) 1_555 1_555 1_555 1_555 yes
   C(21)   Ru(2)   C(25)   C(30)   -124(1)  1_555 1_555 1_555 1_555 yes
   C(21)   C(22)   Ru(2)   C(23)   117.0(8) 1_555 1_555 1_555 1_555 yes
   C(21)   C(22)   Ru(2)   C(24)   80.4(6)  1_555 1_555 1_555 1_555 yes
   C(21)   C(22)   Ru(2)   C(25)   37.7(5)  1_555 1_555 1_555 1_555 yes
   C(21)   C(22)   C(23)   C(24)   0.3(9)   1_555 1_555 1_555 1_555 yes
   C(21)   C(22)   C(23)   C(28)   168.6(8) 1_555 1_555 1_555 1_555 yes
   C(21)   C(25)   Ru(2)   C(22)   -37.0(5) 1_555 1_555 1_555 1_555 yes
   C(21)   C(25)   Ru(2)   C(23)   -78.3(6) 1_555 1_555 1_555 1_555 yes
   C(21)   C(25)   Ru(2)   C(24)   -114.4(8) 1_555 1_555 1_555 1_555 yes
   C(21)   C(25)   C(24)   C(23)   -0.6(9)  1_555 1_555 1_555 1_555 yes
   C(21)   C(25)   C(24)   C(29)   -174.3(8) 1_555 1_555 1_555 1_555 yes
   C(22)   Ru(2)   C(21)   C(25)   117.3(7) 1_555 1_555 1_555 1_555 yes
   C(22)   Ru(2)   C(21)   C(26)   -122(1)  1_555 1_555 1_555 1_555 yes
   C(22)   Ru(2)   C(23)   C(24)   -117.8(8) 1_555 1_555 1_555 1_555 yes
   C(22)   Ru(2)   C(23)   C(28)   121(1)   1_555 1_555 1_555 1_555 yes
   C(22)   Ru(2)   C(24)   C(23)   36.9(5)  1_555 1_555 1_555 1_555 yes
   C(22)   Ru(2)   C(24)   C(25)   -81.3(6) 1_555 1_555 1_555 1_555 yes
   C(22)   Ru(2)   C(24)   C(29)   157(1)   1_555 1_555 1_555 1_555 yes
   C(22)   Ru(2)   C(25)   C(24)   77.5(5)  1_555 1_555 1_555 1_555 yes
   C(22)   Ru(2)   C(25)   C(30)   -161(1)  1_555 1_555 1_555 1_555 yes
   C(22)   C(21)   Ru(2)   C(23)   -37.1(5) 1_555 1_555 1_555 1_555 yes
   C(22)   C(21)   Ru(2)   C(24)   -78.4(5) 1_555 1_555 1_555 1_555 yes
   C(22)   C(21)   Ru(2)   C(25)   -117.3(7) 1_555 1_555 1_555 1_555 yes
   C(22)   C(21)   C(25)   C(24)   0.8(10)  1_555 1_555 1_555 1_555 yes
   C(22)   C(21)   C(25)   C(30)   -167.9(8) 1_555 1_555 1_555 1_555 yes
   C(22)   C(23)   Ru(2)   C(24)   117.8(8) 1_555 1_555 1_555 1_555 yes
   C(22)   C(23)   Ru(2)   C(25)   80.5(6)  1_555 1_555 1_555 1_555 yes
   C(22)   C(23)   C(24)   C(25)   0.2(9)   1_555 1_555 1_555 1_555 yes
   C(22)   C(23)   C(24)   C(29)   174.1(7) 1_555 1_555 1_555 1_555 yes
   C(23)   Ru(2)   C(21)   C(25)   80.2(6)  1_555 1_555 1_555 1_555 yes
   C(23)   Ru(2)   C(21)   C(26)   -159(1)  1_555 1_555 1_555 1_555 yes
   C(23)   Ru(2)   C(22)   C(27)   -122(1)  1_555 1_555 1_555 1_555 yes
   C(23)   Ru(2)   C(24)   C(25)   -118.2(8) 1_555 1_555 1_555 1_555 yes
   C(23)   Ru(2)   C(24)   C(29)   120(1)   1_555 1_555 1_555 1_555 yes
   C(23)   Ru(2)   C(25)   C(24)   36.1(5)  1_555 1_555 1_555 1_555 yes
   C(23)   Ru(2)   C(25)   C(30)   157(1)   1_555 1_555 1_555 1_555 yes
   C(23)   C(22)   Ru(2)   C(24)   -36.6(5) 1_555 1_555 1_555 1_555 yes
   C(23)   C(22)   Ru(2)   C(25)   -79.3(6) 1_555 1_555 1_555 1_555 yes
   C(23)   C(22)   C(21)   C(25)   -0.7(10) 1_555 1_555 1_555 1_555 yes
   C(23)   C(22)   C(21)   C(26)   -172.8(8) 1_555 1_555 1_555 1_555 yes
   C(23)   C(24)   Ru(2)   C(25)   118.2(8) 1_555 1_555 1_555 1_555 yes
   C(23)   C(24)   C(25)   C(30)   168.8(8) 1_555 1_555 1_555 1_555 yes
   C(24)   Ru(2)   C(21)   C(25)   38.9(5)  1_555 1_555 1_555 1_555 yes
   C(24)   Ru(2)   C(21)   C(26)   159(1)   1_555 1_555 1_555 1_555 yes
   C(24)   Ru(2)   C(22)   C(27)   -159(1)  1_555 1_555 1_555 1_555 yes
   C(24)   Ru(2)   C(23)   C(28)   -120(1)  1_555 1_555 1_555 1_555 yes
   C(24)   Ru(2)   C(25)   C(30)   121(1)   1_555 1_555 1_555 1_555 yes
   C(24)   C(23)   Ru(2)   C(25)   -37.3(5) 1_555 1_555 1_555 1_555 yes
   C(24)   C(23)   C(22)   C(27)   -174.0(8) 1_555 1_555 1_555 1_555 yes
   C(24)   C(25)   C(21)   C(26)   172.9(8) 1_555 1_555 1_555 1_555 yes
   C(25)   Ru(2)   C(21)   C(26)   120(1)   1_555 1_555 1_555 1_555 yes
   C(25)   Ru(2)   C(22)   C(27)   157(1)   1_555 1_555 1_555 1_555 yes
   C(25)   Ru(2)   C(23)   C(28)   -158(1)  1_555 1_555 1_555 1_555 yes
   C(25)   Ru(2)   C(24)   C(29)   -120(1)  1_555 1_555 1_555 1_555 yes
   C(25)   C(21)   C(22)   C(27)   173.5(8) 1_555 1_555 1_555 1_555 yes
   C(25)   C(24)   C(23)   C(28)   -168.2(8) 1_555 1_555 1_555 1_555 yes
   C(26)   C(21)   C(22)   C(27)   1(1)     1_555 1_555 1_555 1_555 yes
   C(26)   C(21)   C(25)   C(30)   4(1)     1_555 1_555 1_555 1_555 yes
   C(27)   C(22)   C(23)   C(28)   -5(1)    1_555 1_555 1_555 1_555 yes
   C(28)   C(23)   C(24)   C(29)   5(1)     1_555 1_555 1_555 1_555 yes
   C(29)   C(24)   C(25)   C(30)   -4(1)    1_555 1_555 1_555 1_555 yes
#------------------------------------------------------------------------------
loop_
_geom_contact_atom_site_label_1
_geom_contact_atom_site_label_2
_geom_contact_distance
_geom_contact_site_symmetry_1
_geom_contact_site_symmetry_2
_geom_contact_publ_flag
 Ru(1)     Ru(2)     2.809(1)   1_555 1_555 ?
 Ru(1)     Ti(2)     2.904(2)   1_555 1_555 ?
 Ru(2)     Ti(2)     2.963(2)   1_555 1_555 ?
 Ti(1)     S(1)      2.539(3)   1_555 1_555 ?
 Ti(1)     S(2)      2.534(3)   1_555 1_555 ?
 Ti(1)     S(3)      2.570(3)   1_555 1_555 ?
 C(2)      C(25)     3.31(1)    1_555 1_455 ?
 C(2)      C(21)     3.40(1)    1_555 1_455 ?
 C(2)      C(24)     3.48(1)    1_555 1_455 ?
#------------------------------------------------------------------------------

_publ_contact_author_name           ' Masanobu Hidai'

_publ_contact_author_address
;
    Department of Chemistry and Biotechnology, Graduate School of Engineering, The University of Tokyo, Hongo, Bunkyo-ku, Tokyo 113-8656, Japan
;
_publ_contact_author_email            ' hidai@chembio.t.u-tokyo.ac.jp '
_publ_contact_author_fax              ' +81-3-5800-6945 '
_publ_contact_author_phone            ' +81-3-3812-2111 '
_publ_contact_letter
;
    -
;
_publ_requested_journal               ' Journal of the American Chemical Society'
_publ_requested_category              ' -'

_publ_requested_coeditor_name          ?

_publ_section_title
;
    Electron-Deficient Early-Late Heterobimetallic Sulfido Clusters.  Unusual Reactivities of Ti2Ru2S4 Cubane-Type Clusters with Four Cyclopentadienyl Coligands
;

_publ_section_title_footnote
;
    -
;
loop_
_publ_author_name
_publ_author_footnote
_publ_author_address' Shin-ichiro Kabashima '
;
  Department of Chemistry and Biotechnology, Graduate School of Engineering, The University of Tokyo, Hongo, Bunkyo-ku, Tokyo 113-8656, Japan
;

_publ_section_synopsis
;
    -
;

_publ_section_abstract
;
    -
;

_publ_section_comment
;
    -
;

_publ_section_acknowledgements
;
    -
;

_publ_section_experimental
;
    -
;

_publ_section_references
;
Molecular Structure Corporation, Rigaku Corporation. (1998). teXsan. 
Single Crystal Structure Analysis Software. Version 1.9.
MSC, 3200 Research Forest Drive, The Woodlands, TX 77381, USA.
Rigaku, 3-9-12 Akishima, Tokyo, Japan.
North, A.C.T., Phillips, D. C. & Mathews, F. S. (1968).
Acta Cryst. A24, 351-359.
;

_publ_section_table_legends
;
    -
;

_publ_section_figure_captions
;
    -
;

_publ_section_exptl_prep
;
    -
;

_publ_section_exptl_refinement
;
    -
;


data_[(TiCl3)(CpTi)(Cp*Ru)2S4].CH2Cl2(7.CH2Cl2)
#------------------------------------------------------------------------------
_audit_creation_date                  'Tue Oct  6 11:47:48 1998'
_audit_creation_method                'from TEXRAY.INF file'
_audit_update_record                   ?
#------------------------------------------------------------------------------
_computing_data_collection            'Rigaku/AFC Diffractometer Control'
_computing_cell_refinement            'Rigaku/AFC Diffractometer Control'
_computing_data_reduction             'teXsan'
_computing_structure_solution          'DIRDIF92 (PATTY)'
_computing_structure_refinement       'teXsan'
_computing_publication_material       'teXsan'
_computing_molecular_graphics          ?
#------------------------------------------------------------------------------
_chemical_compound_source              ?
_chemical_name_common                  ?
_chemical_formula_weight               953.02
_chemical_formula_analytical           ?
_chemical_formula_sum                  'C26 H37 Cl5 S4 Ru2 Ti2 '
_chemical_formula_moiety               '?'
_chemical_formula_structural           ?
_chemical_melting_point                ?
#------------------------------------------------------------------------------
_cell_length_a                         9.857(2)
_cell_length_b                         19.792(2)
_cell_length_c                         17.774(2)
_cell_angle_alpha                      90
_cell_angle_beta                       91.72(1)
_cell_angle_gamma                      90
_cell_volume                           3465.8(9)
_cell_formula_units_Z                  4
_cell_measurement_temperature          296.2
_cell_measurement_reflns_used          25
_cell_measurement_theta_min            19.4
_cell_measurement_theta_max            19.9
#------------------------------------------------------------------------------
_symmetry_cell_setting                 monoclinic
_symmetry_space_group_name_H-M        'P 21/n       '
_symmetry_Int_Tables_number            14
_symmetry_space_group_name_Hall        ?
loop_
_symmetry_equiv_pos_as_xyz
x,y,z
1/2-x,1/2+y,1/2-z
-x,-y,-z
1/2+x,1/2-y,1/2+z
#------------------------------------------------------------------------------
_exptl_crystal_description            'prismatic'
_exptl_crystal_colour                 'darkgreen'
_exptl_crystal_size_max                0.400
_exptl_crystal_size_mid                0.200
_exptl_crystal_size_min                0.100
_exptl_crystal_density_diffrn          1.826
_exptl_crystal_density_method         'not measured'
_exptl_crystal_F_000                   1896.00
_exptl_absorpt_coefficient_mu          1.943
_exptl_absorpt_correction_type         psi-scan
_exptl_absorpt_process_details        '(North, Phillips & Mathews, 1968)'
_exptl_absorpt_correction_T_min        0.943
_exptl_absorpt_correction_T_max        1.000
_exptl_special_details
;
 ?
;
#------------------------------------------------------------------------------
_diffrn_special_details
;
 ?
;
_diffrn_ambient_temperature            296.2
_diffrn_radiation_wavelength           0.7107
_diffrn_radiation_type                'Mo K\a'
_diffrn_radiation_source              'Rigaku rotating anode'
_diffrn_radiation_monochromator        graphite
_diffrn_radiation_detector            'scintillation counter'
_diffrn_measurement_device_type       'Rigaku AFC7R'
_diffrn_measurement_method             \w-2\q

_diffrn_standards_number              3
_diffrn_standards_interval_count      150
_diffrn_standards_decay_%             -3.21
loop_
_diffrn_standard_refln_index_h
_diffrn_standard_refln_index_k
_diffrn_standard_refln_index_l
     -1       1     -3
     -1      -1     -3
     -1      -3      0
_diffrn_reflns_number                  8397
_reflns_number_total                   7948
_reflns_number_gt                      4714
_reflns_observed_expression             >2.0sigma(I)
_diffrn_reflns_av_R_equivalents        0.036
_diffrn_reflns_av_sigmaI/netI          0.105
_diffrn_reflns_limit_h_min             0
_diffrn_reflns_limit_h_max             12
_diffrn_reflns_limit_k_min             0
_diffrn_reflns_limit_k_max             25
_diffrn_reflns_limit_l_min             -23
_diffrn_reflns_limit_l_max             23
_diffrn_reflns_theta_min               2.51
_diffrn_reflns_theta_max               27.49
_diffrn_reflns_reduction_process      'Lp corrections applied'
_diffrn_orient_matrix_UB_11            0.01277
_diffrn_orient_matrix_UB_12           -0.03594
_diffrn_orient_matrix_UB_13           -0.03869
_diffrn_orient_matrix_UB_21           -0.03070
_diffrn_orient_matrix_UB_22           -0.03493
_diffrn_orient_matrix_UB_23            0.03641
_diffrn_orient_matrix_UB_31           -0.09590
_diffrn_orient_matrix_UB_32            0.00640
_diffrn_orient_matrix_UB_33           -0.01859
#------------------------------------------------------------------------------
loop_
[truncated: 99,550 more chars]
